# Supplementary material for: Tertiary amine-directed and involved carbonylative cyclizations through Pd/Cu-cocatalyzed multiple C–X (X = H or N) bond cleavage
Source: PubMed Central journal article supplement — Chem Sci. 2019 Aug 19;10(40):9292–301. doi: 10.1039/c9sc03081f (PMC7003976; doi:10.1039/c9sc03081f), 2019-08-19

## Supporting Information

### Tertiary amine-directed and involved carbonylative cyclizations through Pd/Cu-cocatalyzed multiple C-X (X = H or N) bond cleavage

Qiu-Chao Mu,<sup>abc</sup> Yi-Xue Nie,<sup>bc</sup> Xing-Feng Bai,<sup>ab</sup> Jing Chen,<sup>\*a</sup> Lei Yang,<sup>ab</sup> Zheng Xu,<sup>\*b</sup> Li Li,<sup>b</sup>  
Chun-Gu Xia<sup>a</sup> and Li-Wen Xu<sup>\*ab</sup>

<sup>a</sup> State Key Laboratory for Oxo Synthesis and Selective Oxidation, Suzhou Research Institute (SRI),  
Lanzhou Institute of Chemical Physics (LICP), University of the Chinese Academy of Sciences  
(UCAS), Lanzhou 730000, P. R. China

<sup>b</sup> Key Laboratory of Organosilicon Chemistry and Material Technology of Ministry of Education,  
Hangzhou Normal University, Hangzhou 311121, P. R. China

\*[liwenxu@hznu.edu.cn](mailto:liwenxu@hznu.edu.cn), \*[zhengxu@hznu.edu.cn](mailto:zhengxu@hznu.edu.cn), \*[chenj@licp.cas.cn](mailto:chenj@licp.cas.cn)

<sup>c</sup> (Q.-C. Mu, Y.-X. Nie) These authors contributed equally.

#### Table of contents

|                                                                |     |
|----------------------------------------------------------------|-----|
| 1. General.....                                                | S2  |
| 2. Experimental Procedures and Compound Characterizations..... | S3  |
| 3. Mechanistic Studies.....                                    | S43 |
| 4. Reference .....                                             | S78 |
| 5. NMR Spectra.....                                            | S79 |

## 1. General

Unless specifically stated, all reagents were commercially obtained and where appropriate, purified prior to use. Unless other noted, all experiments were carried out in oven-dried Schlenk tube under a mixed CO/O<sub>2</sub> atmosphere with a balloon. THF, toluene and 1,4-dioxane, DMA were purified and dried according to the standard procedures. Reactions were monitored by thin layer chromatography (TLC) using silica gel plates. Flash column chromatography was performed over silica (300-400 mesh). Deuterated solvents were purchased from Cambridge Isotope Laboratories. The other regular chemicals were obtained from commercial suppliers with purity over 98% and used without further purification. Nuclear magnetic resonance spectra (<sup>1</sup>H NMR, <sup>13</sup>C NMR and <sup>19</sup>F NMR) were recorded using a Bruker 400 MHz or 500 MHz spectrometer. The chemical shifts were reported ppm relative to tetramethylsilane (TMS) with the solvent resonance employed as the internal standard (CHCl<sub>3</sub> at 7.26). <sup>13</sup>C NMR was recorded at 100 MHz: CDCl<sub>3</sub>, and 77.0 or 77.16 ppm are commonly used values. <sup>19</sup>F NMR spectra were recorded at 376 MHz. Multiplicities were given as: s (singlet); d (doublet); dd (doublets of doublet); t (triplet); q (quartet); m (multiplets). GC/MS data was collected using an Agilent 7890A series GC and 5975C Ms detector. High-resolution mass spectral (HRMS) data were recorded by an Bruker Daltonics micro TOF-spectrometer. Computational study was conducted using Gauss 09 with B3LYP and the LANL2DZ basis set for Pd, 6-31G(d,p) basis set for other atoms. Activation free energies are given in kcal/mol. Infrared spectra (FT-IR) were recorded using a BRUKER VERTEX 70 Spectrometer and analyzed as thin films, with absorption maxima ( $\nu_{\max}$ ) being quoted in wave numbers (cm<sup>-1</sup>). Melting points (m.p.) were recorded using a JM 628 X-4 melting point apparatus.

## 2. Experimental procedures and Compound characterizations

### 2.1 General procedure for the preparation of the 2<sup>1,2</sup>

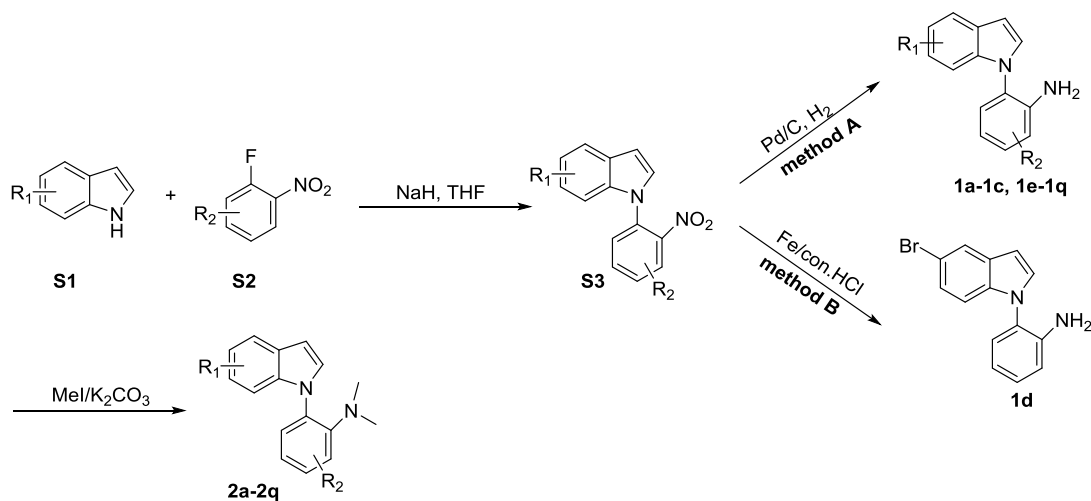

To the stirred solution of Indole **S1** (5 mmol) in dry THF (15 mL), was added NaH (1.5 equiv) at 0 °C under nitrogen atmosphere and the reaction mixture was stirred for 0.5 h at room temperature. **S2** (1.3 equiv) was added slowly and stirred for 24 h at 80 °C under nitrogen atmosphere. Upon completion of reaction, the reaction mixture was quenched with sat. aq. NH<sub>4</sub>Cl, and extracted with EtOAc. The combined organic layer was washed with brine and dried over Na<sub>2</sub>SO<sub>4</sub>, filtered and concentrated under reduce pressure go give crude product **S3**, which could be used without further purification.

**Method A:** To a stirred solution of **S3** in absolute ethanol (30 mL), 10% Pd/C (20 mol%) was added. The reaction mixture was stirred at room temperature under a hydrogen atmosphere using hydrogen balloon until the completion of reaction. The reaction mixture was filtered through Celite and rinsed with EtOAc. The filtrate was evaporated in vacuum to obtain the desired amines **1a-1c, 1e-1q**, which was used without further purification.

**Method B:** **S3** was dissolved in EtOH (60 mL) and water (15 mL). After adding concentrated HCl (0.1 mL) and iron powder (10.0 equiv) to the above solution, the resulting mixture was stirred vigorously at 100 °C under nitrogen atmosphere. Upon completion of the reaction, the reaction mixture was cooled to room temperature, diluted with water, and extracted with EtOAc. The combined organic layer was

washed with brine, dried with anhydrous  $\text{Na}_2\text{SO}_4$ , and concentrated under vacuum to give crude product **1d**, which was used without further purification.

To a stirred solution of **1a-1q** in absolute DMF (15 mL),  $\text{K}_2\text{CO}_3$  (2.5 equiv) was added. The reaction mixture was stirred for 1 h at room temperature under nitrogen atmosphere and MeI (2.2 equiv) was added. The reaction mixture was stirred at 40 °C until the completion of reaction. The reaction mixture was diluted with water, and extracted with EtOAc. The combined organic layer was washed with brine, dried with anhydrous  $\text{Na}_2\text{SO}_4$ , and concentrated under vacuum to give crude product **2a-2q**, which was purified by column chromatography with silica gel.

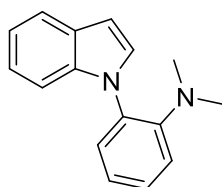

**2a**

**2-(1H-indol-1-yl)-N,N-dimethylaniline (2a)**<sup>3</sup>. Following the general procedure, the product was isolated by column chromatography with petroleum ether/DCM (10 : 1) as the eluent to give a colorless gummy (0.71 g, 60%).  $^1\text{H}$  NMR (400 MHz,  $\text{CDCl}_3$ )  $\delta$  7.59 (t,  $J$  = 4.0 Hz, 1H), 7.27-7.21 (m, 4H), 7.19-7.00 (m, 2H), 7.02 (d,  $J$  = 8.0 Hz, 1H), 6.95 (t,  $J$  = 8.0 Hz, 1H), 6.59 (d,  $J$  = 4.0 Hz, 1H), 2.30 (s, 6H).  $^{13}\text{C}$  NMR (100 MHz,  $\text{CDCl}_3$ )  $\delta$  148.9, 136.0, 130.3, 128.7, 128.6, 120.8, 120.7, 120.6, 119.9, 110.9, 103.0, 102.9, 41.9. HRMS (ESI-TOF) Calcd for  $\text{C}_{16}\text{H}_{16}\text{N}_2$   $[\text{M}+\text{H}]^+$ : 237.1313, found: 237.1387.

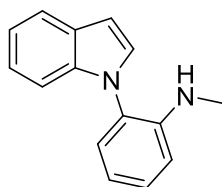

**2a-H**

**2-(1H-indol-1-yl)-N-methylaniline (2a-H)**. Following the general procedure, the product was isolated by column chromatography with petroleum ether/DCM (10 : 1) as the eluent to give a colorless gummy (0.45 g, 40%).  $^1\text{H}$  NMR (400 MHz,  $\text{CDCl}_3$ )  $\delta$  7.73-7.71 (m, 1H), 7.40-7.36 (m, 1H), 7.26-7.17 (m, 4H), 7.14-7.12 (m, 1H), 6.83-6.79 (m, 2H), 6.72 (d,  $J$  = 4.0 Hz, 1H), 3.60 (s, 1H), 2.78 (s, 3H).  $^{13}\text{C}$  NMR (100

MHz, CDCl<sub>3</sub>)  $\delta$  145.6, 136.5, 129.5, 128.8, 128.5, 128.4, 122.2, 120.9, 120.1, 116.5, 110.8, 110.7, 103.2, 30.2. HRMS (ESI-TOF) Calcd for C<sub>15</sub>H<sub>14</sub>N<sub>2</sub>Na [M+Na]<sup>+</sup>: 245.1049, found: 245.1060.

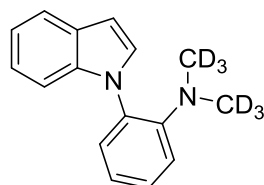

**2a-d<sub>6</sub>**  
>97%D

**2-(1H-indol-1-yl)-N,N-bis(methyl-d<sub>3</sub>)aniline (2a-d<sub>6</sub>)**. Following the general procedure, the product was isolated by column chromatography with petroleum ether/DCM (10 : 1) as the eluent to give a colorless gummy (0.74 g, 61%). <sup>1</sup>H NMR (400 MHz, CDCl<sub>3</sub>)  $\delta$  7.69-7.67 (m, 1H), 7.36-7.28 (m, 4H), 7.19-7.17 (m, 2H), 7.16 (d, *J* = 4.0 Hz, 1H), 7.05-7.01 (t, *J* = 8.0, 8.0 Hz, 1H), 6.69 (d, *J* = 4.0 Hz, 1H) HRMS (ESI-TOF) Calcd for C<sub>16</sub>H<sub>11</sub>D<sub>6</sub>N<sub>2</sub> [M+H]<sup>+</sup>: 243.1763, found: 243.1764.

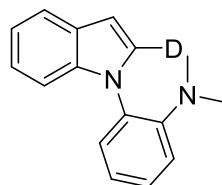

**2a-d<sub>1</sub>**  
>99%D

**2-(1H-indol-1-yl)-2-d-N,N-dimethylaniline (2a-d<sub>1</sub>)**. Following the general procedure, the product was isolated by column chromatography with petroleum ether/DCM (10 : 1) as the eluent to give a colorless gummy (0.45 g, 40%). <sup>1</sup>H NMR (400 MHz, CDCl<sub>3</sub>)  $\delta$  7.59-7.57 (m, 1H), 7.26-7.19 (m, 3H), 7.09-7.05 (m, 2H), 7.00 (d, *J* = 8.0 Hz, 1H), 6.93-6.89 (m, 1H), 6.58 (s, 1H), 2.29 (s, 6H). HRMS (ESI-TOF) Calcd for C<sub>16</sub>H<sub>16</sub>DN<sub>2</sub> [M+H]<sup>+</sup>: 238.1449, found: 238.1457.

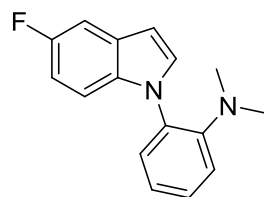

**2b**

**2-(5-fluoro-1H-indol-1-yl)-N,N-dimethylaniline (2b)**<sup>3</sup>. Following the general

procedure, the product was isolated by column chromatography with petroleum ether/DCM (10 : 1) as the eluent to give a colorless gummy (0.69 g, 55%).  $^1\text{H}$  NMR (400 MHz,  $\text{CDCl}_3$ )  $\delta$  7.27 (d,  $J = 4.0$  Hz, 1H), 7.23-7.19 (m, 3H), 7.18 (d,  $J = 8.0$  Hz, 1H), 7.07 (t,  $J = 4.0$  Hz, 1H), 6.99-6.88 (m, 1H), 6.83-6.78 (m, 1H), 6.52 (d,  $J = 4.0$  Hz, 1H), 2.27 (s, 6H).  $^{13}\text{C}$  NMR (100 MHz,  $\text{CDCl}_3$ )  $\delta$  159.3, 157.0, 148.8, 132.5, 130.2 (d,  $J = 3.0$  Hz), 128.9 (d,  $J = 11.0$  Hz), 128.6, 128.3, 120.9, 118.5, 111.7 (d,  $J = 9.0$  Hz), 110.3 (d,  $J = 20.0$  Hz), 105.5 (d,  $J = 23.0$  Hz), 102.9 (d,  $J = 5.0$  Hz). HRMS (ESI-TOF) Calcd for  $\text{C}_{16}\text{H}_{16}\text{FN}_2$   $[\text{M}+\text{H}]^+$ : 255.1292, found: 255.1300.

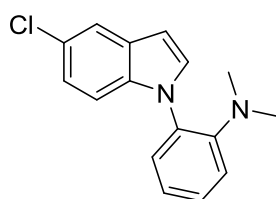

**2c**

**2-(5-chloro-1H-indol-1-yl)-N,N-dimethylaniline (2c)**<sup>3</sup>. Following the general procedure, the product was isolated by column chromatography with petroleum ether/DCM (10 : 1) as the eluent to give a colorless gummy (0.78 g, 58%).  $^1\text{H}$  NMR (400 MHz,  $\text{CDCl}_3$ )  $\delta$  7.55 (d,  $J = 4.0$  Hz, 1H), 7.28-7.26 (m, 2H), 7.20-7.18 (m, 1H), 7.10 (d,  $J = 8.0$  Hz, 1H), 7.05-7.03 (m, 2H), 6.95 (s, 1H), 6.54-6.53 (m, 1H), 2.30 (s, 6H).  $^{13}\text{C}$  NMR (100 MHz,  $\text{CDCl}_3$ )  $\delta$  148.7, 134.3, 129.9, 129.6, 128.6, 128.4, 125.6, 122.2, 121.0, 120.0, 118.6, 112.0, 102.6, 41.9. HRMS (ESI-TOF) Calcd for  $\text{C}_{16}\text{H}_{16}\text{ClN}_2$   $[\text{M}+\text{H}]^+$ : 271.0997, found: 271.1000.

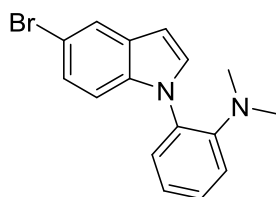

**2d**

**2-(5-bromo-1H-indol-1-yl)-N,N-dimethylaniline (2d)**. Following the general procedure, the product was isolated by column chromatography with petroleum ether/DCM (10 : 1) as the eluent to give a colorless gummy (0.71 g, 45%).  $^1\text{H}$  NMR (400 MHz,  $\text{CDCl}_3$ )  $\delta$  7.69 (s, 1H), 7.25-7.21 (m, 2H), 7.17-7.14 (m, 2H), 7.05-6.99 (m,

2H), 6.94-6.92 (m, 1H), 6.52 (d,  $J = 4.0$  Hz, 1H), 2.27 (s, 6H).  $^{13}\text{C}$  NMR (100 MHz,  $\text{CDCl}_3$ )  $\delta$  149.0, 134.8, 130.5, 130.1, 128.8, 128.7, 125.0, 123.3, 121.2, 118.8, 113.4, 112.7, 102.7, 42.1. HRMS (ESI-TOF) Calcd for  $\text{C}_{16}\text{H}_{16}\text{BrN}_2$   $[\text{M}+\text{H}]^+$ : 315.0491, found: 315.0502.

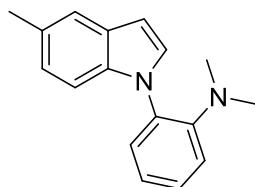

**2e**

*N,N*-dimethyl-2-(5-methyl-1*H*-indol-1-yl)-aniline (**2e**)<sup>3</sup>. Following the general procedure, the product was isolated by column chromatography with petroleum ether/DCM (10 : 1) as the eluent to give a colorless gummy (0.75 g, 60%).  $^1\text{H}$  NMR (400 MHz,  $\text{CDCl}_3$ )  $\delta$  7.35 (s, 1H), 7.21-7.16 (m, 3H), 7.09 (d,  $J = 8.0$  Hz, 1H), 6.97 (d,  $J = 8.0$  Hz, 1H), 6.91 (t,  $J = 8.0, 8.0$  Hz, 2H), 6.48 (s, 1H), 2.36 (s, 3H), 2.28 (s, 6H).  $^{13}\text{C}$  NMR (100 MHz,  $\text{CDCl}_3$ )  $\delta$  149.5, 134.8, 129.2, 129.0, 128.8, 128.7, 123.6, 120.9, 120.5, 118.4, 110.1, 102.6, 42.0, 21.6. HRMS (ESI-TOF) Calcd for  $\text{C}_{17}\text{H}_{19}\text{N}_2$   $[\text{M}+\text{H}]^+$ : 251.1543, found: 251.1548.

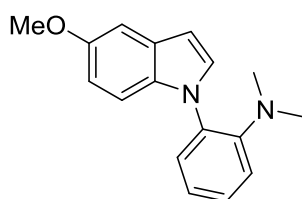

**2f**

2-(5-methoxy-1*H*-indol-1-yl)-*N,N*-dimethylaniline (**2f**)<sup>3</sup>. Following the general procedure, the product was isolated by column chromatography with petroleum ether/DCM (5 : 1) as the eluent to give a colorless gummy (0.70 g, 53%).  $^1\text{H}$  NMR (400 MHz,  $\text{CDCl}_3$ )  $\delta$  7.25-7.18 (m, 3H), 7.11 (d,  $J = 2.0$  Hz, 1H), 7.05 (s, 1H), 7.02 (d,  $J = 8.0$  Hz, 1H), 6.95-6.91 (m, 1H), 6.77 (t,  $J = 8.0, 4.0$  Hz, 1H), 6.52 (d,  $J = 4.0$  Hz, 1H), 3.79 (s, 3H), 2.32 (s, 6H).  $^{13}\text{C}$  NMR (100 MHz,  $\text{CDCl}_3$ )  $\delta$  154.3, 148.7, 131.2, 130.4, 129.1, 129.0, 128.5, 127.9, 120.8, 118.3, 112.0, 111.7, 102.5, 102.2, 55.8, 41.8. HRMS (ESI-TOF) Calcd for  $\text{C}_{17}\text{H}_{19}\text{N}_2\text{O}$   $[\text{M}+\text{H}]^+$ : 267.1492, found: 267.1500.

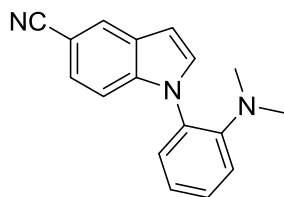

**2g**

**1-(2-(dimethylamino)phenyl)-1H-indole-5-carbonitrile (2g).** Following the general procedure, the product was isolated by column chromatography with petroleum ether/DCM (5 : 1) as the eluent to give a colorless semi-solid (0.50 g, 38%). <sup>1</sup>H NMR (400 MHz, CDCl<sub>3</sub>) δ 7.93 (s, 1H), 7.38 (d, *J* = 4.0 Hz, 1H), 7.33-7.27 (m, 2H), 7.22-7.16 (m, 2H), 7.06 (d, *J* = 8.0 Hz, 1H), 6.98 (t, *J* = 4.0, 8.0 Hz, 1H), 6.67 (s, 1H), 2.28 (s, 6H). <sup>13</sup>C NMR (100 MHz, CDCl<sub>3</sub>) δ 148.8, 137.4, 131.0, 128.9, 128.4, 128.3, 126.2, 124.9, 121.2, 118.8, 111.9, 103.7, 103.0, 41.9. HRMS (ESI-TOF) Calcd for C<sub>17</sub>H<sub>15</sub>N<sub>3</sub> [M+H]<sup>+</sup>: 262.1266, found: 262.1330.

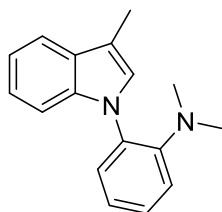

**2h**

***N,N*-dimethyl-2-(3-methyl-1H-indol-1-yl)aniline (2h).** Following the general procedure, the product was isolated by column chromatography with petroleum ether/DCM (10 : 1) as the eluent to give a colorless semi-solid (0.64 g, 51%). <sup>1</sup>H NMR (400 MHz, CDCl<sub>3</sub>) δ 7.53 (d, *J* = 8.0 Hz, 1H), 7.21-7.15 (m, 3H), 7.10-7.04 (m, 3H), 6.99 (d, *J* = 8.0 Hz, 1H), 6.91 (t, *J* = 4.0, 8.0 Hz, 1H), 2.31 (s, 9H). <sup>13</sup>C NMR (100 MHz, CDCl<sub>3</sub>) δ 148.8, 136.2, 129.1, 128.7, 127.7, 126.1, 121.8, 119.3, 118.7, 118.3, 112.1, 110.9, 41.9, 9.83. HRMS (ESI-TOF) Calcd for C<sub>17</sub>H<sub>19</sub>N<sub>2</sub> [M+H]<sup>+</sup>: 251.1543, found: 251.1548.



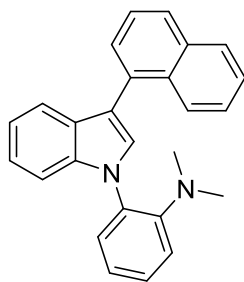

**2i**

***N,N*-dimethyl-2-(3-(naphthalen-1-yl)-1*H*-indol-1-yl)aniline (2i).** Following the general procedure, the product was isolated by column chromatography with petroleum ether/DCM (5 : 1) as the eluent to give a light brown semi-solid (0.54 g, 30%). <sup>1</sup>H NMR (400 MHz, CDCl<sub>3</sub>) δ 8.11 (d, *J* = 8.0 Hz, 1H), 7.85 (d, *J* = 8.0 Hz, 1H), 7.80 (d, *J* = 8.0 Hz, 1H), 7.60 (d, *J* = 8.0 Hz, 1H), 7.50-7.46 (m, 3H), 7.43-7.37 (m, 2H), 7.35-7.32 (m, 2H), 7.29-7.25 (m, 1H), 7.19-7.14 (m, 1H), 7.09 (t, *J* = 8.0, 4.0 Hz, 2H), 7.02 (t, *J* = 8.0, 8.0 Hz, 1H), 2.4 (s, 6H). <sup>13</sup>C NMR (100 MHz, CDCl<sub>3</sub>) δ 148.9, 134.1, 128.6, 128.3, 128.2, 127.7, 127.2, 126.6, 125.7, 122.4, 120.3, 120.2, 111.1, 42.1. HRMS (ESI-TOF) Calcd for C<sub>26</sub>H<sub>22</sub>N<sub>2</sub> [M+H]<sup>+</sup>: 363.1783, found:363.1857.

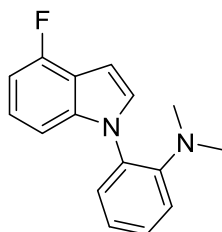

**2j**

**2-(4-fluoro-1*H*-indol-1-yl)-*N,N*-dimethylaniline (2j).** Following the general procedure, the product was isolated by column chromatography with petroleum ether/DCM (10 : 1) as the eluent to give a colorless gummy (0.57 g, 40%). <sup>1</sup>H NMR (400 MHz, CDCl<sub>3</sub>) δ 7.23-7.16 (m, 3H), 6.99-6.87 (m, 4H), 6.72-6.67 (m, 1H), 6.65 (d, *J* = 4.0 Hz, 1H), 2.27 (s, 6H). <sup>13</sup>C NMR (100 MHz, CDCl<sub>3</sub>) δ 157.5, 155.1, 148.9, 138.8 (d, *J* = 11.0 Hz), 128.7, 128.5, 122.4 (d, *J* = 8.0 Hz), 120.9, 118.6, 117.5, 107.1 (d, *J* = 3.0 Hz), 104.9 (d, *J* = 19.0 Hz), 99.0, 41.9. <sup>19</sup>F NMR (376 MHz, CDCl<sub>3</sub>): δ -122.5. HRMS (ESI-TOF) Calcd for C<sub>16</sub>H<sub>16</sub>FN<sub>2</sub> [M+H]<sup>+</sup>: 255.1292, found: 255.1298.

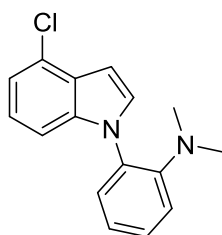

**2k**

**2-(4-chloro-1H-indol-1-yl)-N,N-dimethylaniline (2k).** Following the general procedure, the product was isolated by column chromatography with petroleum ether/DCM (10 : 1) as the eluent to give a colorless gummy (0.77 g, 53%). <sup>1</sup>H NMR (400 MHz, CDCl<sub>3</sub>) δ 7.26 (d, *J* = 4.0 Hz, 1H), 7.21 (t, *J* = 12.0, 12.0 Hz, 1H), 7.15 (d, *J* = 8.0 Hz, 1H), 7.05 (t, *J* = 8.0, 12.0 Hz, 2H), 6.98-6.94 (m, 2H), 6.91 (t, *J* = 8.0, 8.0 Hz, 1H), 6.67 (d, *J* = 4.0 Hz, 1H), 2.26 (s, 6H). <sup>13</sup>C NMR (100 MHz, CDCl<sub>3</sub>) δ 149.1, 137.1, 130.2, 129.6, 128.9, 128.8, 127.7, 126.2, 122.8, 121.3, 120.1, 118.9, 110.0, 101.8, 42.2. HRMS (ESI-TOF) Calcd for C<sub>16</sub>H<sub>16</sub>ClN<sub>2</sub> [M+H]<sup>+</sup>: 271.0997, found: 271.1000.

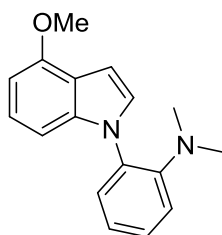

**2l**

**2-(4-methoxy-1H-indol-1-yl)-N,N-dimethylaniline (2l).** Following the general procedure, the product was isolated by column chromatography with petroleum ether/DCM (5 : 1) as the eluent to give a colorless gummy (0.93 g, 70%). <sup>1</sup>H NMR (400 MHz, CDCl<sub>3</sub>) δ 7.26 (t, *J* = 8.0, 8.0 Hz, 2H), 7.18 (s, 1H), 7.05 (t, *J* = 8.0, 8.0 Hz, 2H), 6.96 (d, *J* = 8.0, 1H), 6.84 (d, *J* = 8.0, 1H), 6.71 (d, *J* = 4.0 Hz, 1H), 6.51 (d, *J* = 8.0 Hz, 1H), 3.92 (s, 3H), 2.33 (s, 6H). <sup>13</sup>C NMR (100 MHz, CDCl<sub>3</sub>) δ 153.1, 137.5, 130.3, 128.8, 128.1, 127.3, 122.6, 119.0, 118.4, 104.3, 100.1, 99.8, 55.3, 41.9. HRMS (ESI-TOF) Calcd for C<sub>17</sub>H<sub>19</sub>N<sub>2</sub>O [M+H]<sup>+</sup>: 267.1492, found: 267.1499.

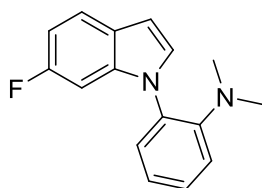

**2m**

**2-(6-fluoro-1H-indol-1-yl)-N,N-dimethylaniline (2m).** Following the general procedure, the product was isolated by column chromatography with petroleum ether/DCM (10 : 1) as the eluent to give a colorless gummy (0.79 g, 62%). <sup>1</sup>H NMR (400 MHz, CDCl<sub>3</sub>) δ 7.48-7.44 (m, 1H), 7.24-7.16 (m, 3H), 7.01 (d, *J* = 8.0 Hz, 1H), 6.93 (t, *J* = 8.0, 8.0 Hz, 1H), 6.86-6.79 (m, 1H), 6.55 (d, *J* = 4.0 Hz, 1H), 2.29 (s, 6H). <sup>13</sup>C NMR (100 MHz, CDCl<sub>3</sub>) δ 161.0, 158.7, 148.5, 138.7, 135.9 (d, *J* = 12.0 Hz), 128.9, 128.3, 125.0, 121.1 (d, *J* = 10.0 Hz), 118.3, 108.6 (d, *J* = 25.0 Hz), 102.9, 97.4 (d, *J* = 27.0 Hz), 41.7. <sup>19</sup>F NMR (376 MHz, CDCl<sub>3</sub>): δ -120.8. HRMS (ESI-TOF) Calcd for C<sub>16</sub>H<sub>16</sub>FN<sub>2</sub> [M+H]<sup>+</sup>: 255.1292, found: 255.1298.

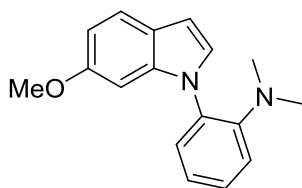

**2n**

**2-(6-methoxy-1H-indol-1-yl)-N,N-dimethylaniline (2n).** Following the general procedure, the product was isolated by column chromatography with petroleum ether/DCM (5 : 1) as the eluent to give a colorless gummy (0.60 g, 45%). <sup>1</sup>H NMR (400 MHz, CDCl<sub>3</sub>) δ 7.46 (d, *J* = 8.0 Hz, 1H), 7.27-7.23 (m, 2H), 7.15 (d, *J* = 4.0 Hz, 1H), 7.04 (d, *J* = 4.0 Hz, 1H), 6.97 (t, *J* = 8.0, 8.0 Hz, 1H), 6.76-6.73 (m, 1H), 6.67 (s, 1H), 6.53 (d, *J* = 4.0 Hz, 1H), 3.71 (s, 3H), 2.34 (s, 6H). <sup>13</sup>C NMR (100 MHz, CDCl<sub>3</sub>) δ 156.4, 136.7, 130.3, 128.7, 128.0, 127.6, 122.8, 121.1, 118.4, 109.9, 102.8, 94.4, 55.6, 41.8. HRMS (ESI-TOF) Calcd for C<sub>17</sub>H<sub>19</sub>N<sub>2</sub>O [M+H]<sup>+</sup>: 267.1492, found: 267.1498.

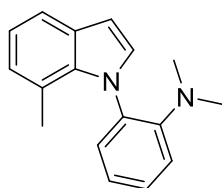

**2o**

***N,N*-dimethyl-2-(7-methyl-1*H*-indol-1-yl)-aniline (2o).** Following the general procedure, the product was isolated by column chromatography with petroleum ether/DCM (10 : 1) as the eluent to give a colorless gummy (0.42 g, 33%). <sup>1</sup>H NMR (400 MHz, CDCl<sub>3</sub>) δ 7.43 (d, *J* = 8.0 Hz, 1H), 7.24 (t, *J* = 8.0, 8.0 Hz, 1H), 7.11 (d, *J* = 8.0 Hz, 1H), 7.03 (d, *J* = 4.0 Hz, 1H), 6.96-6.81 (m, 4H), 6.54 (s, 1H), 2.33 (s, 6H), 1.97 (s, 3H). <sup>13</sup>C NMR (100 MHz, CDCl<sub>3</sub>) δ 149.9, 135.2, 132.4, 130.8, 130.3, 129.4, 128.8, 124.5, 122.3, 120.0, 119.9, 118.8, 117.7, 103.0, 42.1, 18.7. HRMS (ESI-TOF) Calcd for C<sub>17</sub>H<sub>18</sub>N<sub>2</sub> [M+H]<sup>+</sup>: 251.1548, found: 251.1545.

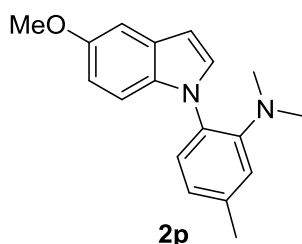

**2p**

**2-(5-methoxy-1*H*-indol-1-yl)-*N,N*,5-trimethylaniline (2p).** Following the general procedure, the product was isolated by column chromatography with petroleum ether/DCM (5 : 1) as the eluent to give a colorless gummy (0.35 g, 25%). <sup>1</sup>H NMR (400 MHz, CDCl<sub>3</sub>) δ 7.18 (d, *J* = 4.0 Hz, 1H), 7.06 (d, *J* = 8.0 Hz, 2H), 7.01 (s, 1H), 6.76-6.68 (m, 3H), 6.47 (d, *J* = 4.0 Hz, 1H), 3.74 (s, 3H), 2.28 (s, 3H), 2.26 (s, 6H). <sup>13</sup>C NMR (100 MHz, CDCl<sub>3</sub>) δ 154.4, 148.5, 137.9, 129.3, 129.0, 128.4, 128.0, 121.5, 119.0, 112.0, 111.8, 102.4, 102.2, 55.8, 41.9, 21.6. HRMS (ESI-TOF) Calcd for C<sub>18</sub>H<sub>20</sub>N<sub>2</sub>O [M+H]<sup>+</sup>: 281.1654, found: 281.1652.

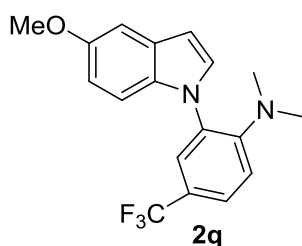

**2q**

## 2-(5-methoxy-1*H*-indol-1-yl)-*N,N*-dimethyl-4-(trifluoromethyl)aniline (2q).

Following the general procedure, the product was isolated by column chromatography with petroleum ether/DCM (5 : 1) as the eluent to give a colorless gummy (0.45 g, 27%). <sup>1</sup>H NMR (400 MHz, CDCl<sub>3</sub>) δ 7.31 (d, *J* = 8.0 Hz, 1H), 7.22-7.14 (m, 3H), 7.07 (s, 1H), 7.05 (d, *J* = 4.0 Hz, 1H), 6.78 (d, *J* = 8.0 Hz, 1H), 6.54 (s, 1H), 3.78 (s, 3H), 2.35 (s, 6H). <sup>13</sup>C NMR (100 MHz, CDCl<sub>3</sub>) δ 154.7, 148.8, 132.9, 130.8, 130.0, 129.7, 129.2, 128.8, 128.4, 125.4, 122.7, 117.2 (d, *J* = 3.0 Hz), 115.1, 112.4, 111.5, 103.6, 102.5, 55.7, 41.4. <sup>19</sup>F NMR (376 MHz, CDCl<sub>3</sub>): δ -62.4. HRMS (ESI-TOF) Calcd for C<sub>18</sub>H<sub>18</sub>F<sub>3</sub>N<sub>2</sub>O [M+H]<sup>+</sup>: 335.1366, found: 335.1350.

### 2.2 General procedure for the preparation of the 3

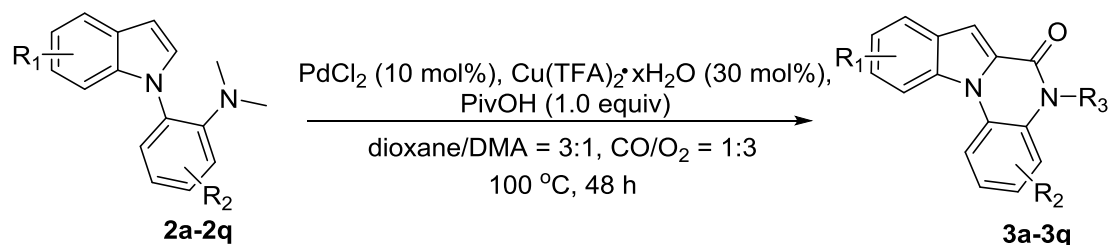

In an oven-dried Schlenk tube equipped with a stir-bar, **2a-2q** (0.5 mmol, 1.0 equiv), PdCl<sub>2</sub> (10 mol %), Cu(TFA)<sub>2</sub> · xH<sub>2</sub>O (30 mol %), PivOH (1.0 equiv) were combined. A balloon filled V(CO)/V(O<sub>2</sub>) = (1:3) (1 atm) was connected to the Schlenk tube via the side tube and purged for 3 times. Then dioxane/DMA = 3:1 (2.0 mL) were added to the tube via a syringe. The Schlenk tube was heated at 100 °C for 48 h, then cooled to room temperature. The reaction was quenched by aq. brine and extracted with EtOAc. The combined organic layer were washed with brine and dried over anhydrous Na<sub>2</sub>SO<sub>4</sub>, filtered and concentrated under reduce pressure. The residue was purified by column chromatography on silica gel to afford the corresponding products

### 3a-3q.

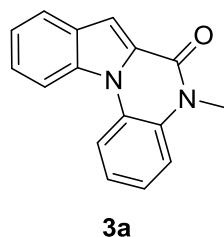

**5-methylindolo[1,2-*a*]quinoxalin-6(5*H*)-one (3a)**<sup>3,4</sup>. Following the general procedure, the product was isolated by column chromatography with petroleum

ether/EtOAc (4 : 1) as the eluent to give a brown solid (75 mg, 60%).  $^1\text{H}$  NMR (400 MHz,  $\text{CDCl}_3$ )  $\delta$  8.25-8.23 (m, 1H), 8.17 (d,  $J = 8.0$  Hz, 1H), 7.80 (d,  $J = 8.0$  Hz, 1H), 7.48 (s, 1H), 7.44-7.39 (m, 1H), 7.29-7.18 (m, 4H), 3.61 (s, 3H).  $^{13}\text{C}$  NMR (100 MHz,  $\text{CDCl}_3$ )  $\delta$  156.6, 134.2, 129.8, 129.2, 128.1, 125.3, 124.1, 123.2, 122.4, 115.5, 115.4, 114.2, 106.8, 28.9. HRMS (ESI-TOF) Calcd for  $\text{C}_{16}\text{H}_{13}\text{N}_2\text{O}$   $[\text{M}+\text{H}]^+$ : 249.1022, found: 249.1020.

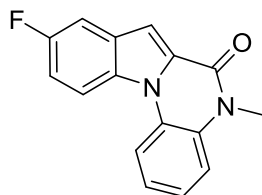

**3b**

**9-Fluoro-5-methylindolo[1,2-*a*]quinoxalin-6(5*H*)-one (3b)**<sup>3,4</sup>. Following the general procedure, the product was isolated by column chromatography with petroleum ether/EtOAc (4 : 1) as the eluent to give a brown solid (68 mg, 51%).  $^1\text{H}$  NMR (400 MHz,  $\text{CDCl}_3$ )  $\delta$  8.20-8.18 (m, 1H), 8.14-8.11 (m, 1H), 7.44-7.33 (m, 2H), 7.31-7.26 (m, 3H), 7.19-7.15 (m, 1H), 3.64 (s, 3H).  $^{13}\text{C}$  NMR (100 MHz,  $\text{CDCl}_3$ )  $\delta$  158.6, 156.2, 154.9, 129.6, 128.7, 128.6, 128.5, 128.2, 125.0, 123.2, 122.1, 114.5, 113.8, 106.4 (d,  $J = 22.0$  Hz), 105.2 (d,  $J = 5.0$  Hz), 27.7. HRMS (ESI-TOF) Calcd for  $\text{C}_{16}\text{H}_{11}\text{FN}_2\text{NaO}$   $[\text{M}+\text{Na}]^+$ : 289.0748, found: 289.0740.

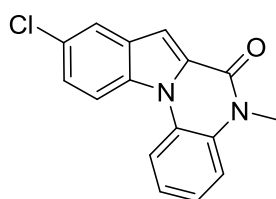

**3c**

**9-chloro-5-methylindolo[1,2-*a*]quinoxalin-6(5*H*)-one (3c)**<sup>3,4</sup>. Following the general procedure, the product was isolated by column chromatography with petroleum ether/EtOAc (4 : 1) as the eluent to give a brown solid (74 mg, 52%).  $^1\text{H}$  NMR (400 MHz,  $\text{CDCl}_3$ )  $\delta$  8.16 (t,  $J = 8.0, 4.0$  Hz, 1H), 8.07 (d,  $J = 8.0$  Hz, 1H), 7.72 (s, 1H), 7.39-7.19 (m, 6H), 3.58 (s, 3H).  $^{13}\text{C}$  NMR (100 MHz,  $\text{CDCl}_3$ )  $\delta$  156.1, 132.3, 130.1, 129.7, 129.1, 128.0, 126.1, 125.4, 124.5, 123.3, 122.2, 115.7, 115.2, 115.1, 105.9,

29.0. HRMS (ESI-TOF) Calcd for C<sub>16</sub>H<sub>12</sub>ClN<sub>2</sub>O [M+H]<sup>+</sup>: 283.0633, found: 283.0640.

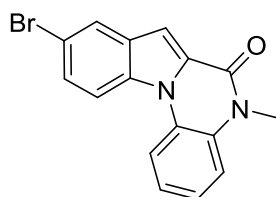

**3d**

**9-bromo-5-methylindolo[1,2-*a*]quinoxalin-6(5*H*)-one (3d).** Following the general procedure, the product was isolated by column chromatography with petroleum ether/EtOAc (4 : 1) as the eluent to give a brown solid (46 mg, 41%) (m.p. 226-228 °C). <sup>1</sup>H NMR (400 MHz, CDCl<sub>3</sub>) δ 8.14 (d, *J* = 4.0 Hz, 1H), 8.01 (d, *J* = 8.0 Hz, 1H), 7.88 (s, 1H), 7.47 (d, *J* = 8.0 Hz, 1H), 7.37 (s, 1H), 7.28 (d, *J* = 4.0 Hz, 3H), 3.62 (s, 3H). <sup>13</sup>C NMR (100 MHz, CDCl<sub>3</sub>) δ 156.4, 132.9, 131.0, 130.1, 129.2, 128.3, 126.4, 125.7, 124.9, 123.7, 116.0, 115.7, 115.6, 106.1, 29.3. IR (neat) 2962, 2920, 2851, 1660, 1619, 1519, 1450, 1397, 1262, 1221, 1102, 801, 779, 743, 725 cm<sup>-1</sup>. HRMS (ESI-TOF) Calcd for C<sub>16</sub>H<sub>12</sub>BrN<sub>2</sub>O [M+H]<sup>+</sup>: 327.0128, found: 327.0139.

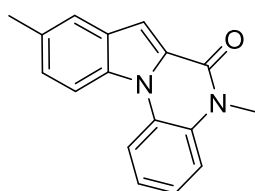

**3e**

**5,9-dimethylindolo[1,2-*a*]quinoxalin-6(5*H*)-one (3e)**<sup>3,4</sup>. Following the general procedure, the product was isolated by column chromatography with petroleum ether/EtOAc (4 : 1) as the eluent to give a brown solid (66 mg, 50%). <sup>1</sup>H NMR (400 MHz, CDCl<sub>3</sub>) δ 8.24 (d, *J* = 8.0, 1H), 8.07 (d, *J* = 8.0 Hz, 1H), 7.58 (s, 1H), 7.42 (s, 1H), 7.30-7.24 (m, 4H), 3.63 (s, 3H), 2.45 (s, 3H). <sup>13</sup>C NMR (100 MHz, CDCl<sub>3</sub>) δ 156.6, 132.6, 132.0, 129.8, 129.5, 128.1, 127.1, 126.7, 123.9, 123.2, 122.6, 115.5, 115.2, 113.8, 106.3, 28.9, 21.3. HRMS (ESI-TOF) Calcd for C<sub>17</sub>H<sub>14</sub>N<sub>2</sub>O [M+H]<sup>+</sup>: 263.1106, found: 263.1183.

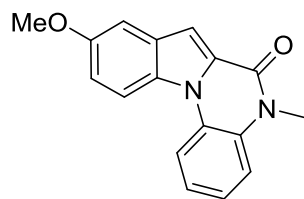

**3f**

**9-methoxy-5-methylindolo[1,2-*a*]quinoxalin-6(5*H*)-one (3f)**<sup>3,4</sup>. Following the general procedure, the product was isolated by column chromatography with petroleum ether/EtOAc (3 : 1) as the eluent to give a brown solid (86 mg, 62%). <sup>1</sup>H NMR (400 MHz, CDCl<sub>3</sub>) δ 8.12 (t, *J* = 4.0, 4.0 Hz, 1H), 8.00 (d, *J* = 12.0 Hz, 1H), 7.36 (s, 1H), 7.25-7.18 (m, 3H), 7.11 (s, 1H), 7.03-7.00 (m, 1H), 3.82 (s, 3H), 3.59 (s, 3H). <sup>13</sup>C NMR (100 MHz, CDCl<sub>3</sub>) δ 164.6, 156.3, 155.4, 130.0, 129.6, 129.3, 128.4, 126.4, 123.1, 116.2, 115.5, 115.0, 114.9, 106.2, 103.0, 55.5, 28.9. HRMS (ESI-TOF) Calcd for C<sub>17</sub>H<sub>15</sub>N<sub>2</sub>O<sub>2</sub> [M+H]<sup>+</sup>: 279.1128, found: 279.1135.

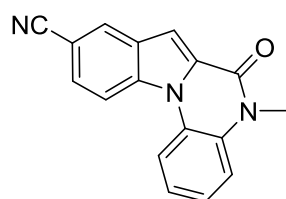

**3g**

**5-methyl-6-oxo-5,6-dihydroindolo[1,2-*a*]quinoxaline-9-carbonitrile (3g)**. Following the general procedure, the product was isolated by column chromatography with petroleum ether/EtOAc (3 : 1) as the eluent to give a brown solid (55 mg, 40%) (m.p. 269-271 °C). <sup>1</sup>H NMR (400 MHz, CDCl<sub>3</sub>) δ 8.27-8.20 (m, 2H), 8.14 (s, 1H), 7.63 (d, *J* = 8.0 Hz, 1H), 7.54 (s, 1H), 7.35-7.29 (m, 3H), 3.65 (s, 3H). <sup>13</sup>C NMR (100 MHz, CDCl<sub>3</sub>) δ 156.2, 135.4, 130.3, 129.0, 128.8, 127.5, 126.0, 125.7, 123.9, 119.6, 116.3, 116.0, 115.4, 107.3, 106.2, 29.9. IR (neat) 2960, 2923, 2852, 2220, 1729, 1656, 1604, 1504, 1455, 1420, 1297, 1260, 1100, 1029, 895, 802, 744 cm<sup>-1</sup>. HRMS (ESI-TOF) Calcd for C<sub>17</sub>H<sub>12</sub>N<sub>3</sub>O [M+H]<sup>+</sup>: 274.0975, found: 274.0973.



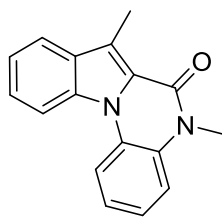

**3h**

**5,7-dimethylindolo[1,2-*a*]quinoxalin-6(5H)-one (3h).** Following the general procedure, the product was isolated by column chromatography with petroleum ether/EtOAc (4 : 1) as the eluent to give a light brown solid (50 mg, 38%) (m.p. 190-192 °C). <sup>1</sup>H NMR (400 MHz, CDCl<sub>3</sub>) δ 8.07 (t, *J* = 8.0, 8.0 Hz, 2H), 7.71 (d, *J* = 4.0 Hz, 1H), 7.38 (d, *J* = 8.0 Hz, 1H), 7.26 (t, *J* = 8.0, 8.0 Hz, 1H), 7.17 (d, *J* = 16.0 Hz, 3H), 3.50 (d, *J* = 4.0 Hz, 3H), 2.73 (d, *J* = 4.0 Hz, 3H). <sup>13</sup>C NMR (100 MHz, CDCl<sub>3</sub>) δ 157.8, 132.8, 130.0, 129.8, 126.8, 125.5, 123.5, 123.0, 122.9, 121.6, 120.9, 118.9, 115.1, 114.9, 113.9, 28.4, 9.8. IR (neat) 2917, 1652, 1507, 1451, 1420, 1381, 1304, 1257, 1080, 800, 729 cm<sup>-1</sup>. HRMS (ESI-TOF) Calcd for C<sub>17</sub>H<sub>15</sub>N<sub>2</sub>O [M+H]<sup>+</sup>: 263.1179, found: 263.1182.

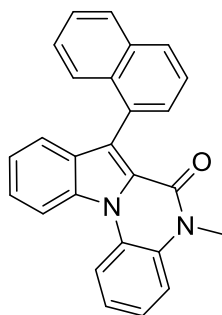

**3i**

**5-methyl-7-(naphthalene-1-yl)indolo[1,2-*a*]quinoxalin-6(5H)-one (3i).** Following the general procedure, the product was isolated by column chromatography with petroleum ether/EtOAc (3 : 1) as the eluent to give a light brown solid (81 mg, 43%) (m.p. 232-234 °C). <sup>1</sup>H NMR (400 MHz, CDCl<sub>3</sub>) δ 8.37 (d, *J* = 8.0 Hz, 1H), 8.29 (d, *J* = 8.0 Hz, 1H), 7.88 (t, *J* = 12.0, 8.0 Hz, 2H), 7.54-7.45 (m, 4H), 7.38-7.27 (m, 2H), 7.25-7.14 (m, 5H), 3.47 (s, 3H). <sup>13</sup>C NMR (100 MHz, CDCl<sub>3</sub>) δ 156.1, 133.4, 131.2, 128.4, 128.1, 127.9, 126.1, 125.7, 125.6, 125.4, 125.0, 124.1, 122.9, 122.4, 122.3, 115.4, 113.9, 28.6. IR (neat) 2961, 2920, 1720, 1655, 1592, 1448, 1420, 1301, 1255, 1081, 1057, 959, 862, 803, 778, 733 cm<sup>-1</sup>. HRMS (ESI-TOF) Calcd for C<sub>26</sub>H<sub>18</sub>N<sub>2</sub>NaO

[M+Na]<sup>+</sup>: 397.1311, found:397.1312.

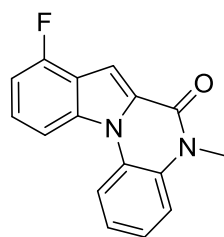

**3j**

**8-fluoro-5-methylindolo[1,2-*a*]quinoxalin-6(5*H*)-one (3j).** Following the general procedure, the product was isolated by column chromatography with petroleum ether/EtOAc (4 : 1) as the eluent to give a brown solid (65 mg, 49%) (m.p. 200-202 °C). <sup>1</sup>H NMR (400 MHz, CDCl<sub>3</sub>) δ 8.24 (d, *J* = 8.0 Hz, 1H), 7.96 (d, *J* = 12.0 Hz, 1H), 7.58 (s, 1H), 7.38-7.33 (m, 1H), 7.29-7.19 (m, 3H), 6.98 (t, *J* = 8.0, 8.0 Hz, 1H), 3.63 (s, 3H). <sup>13</sup>C NMR (100 MHz, CDCl<sub>3</sub>) δ 158.4, 156.2, 155.9, 136.1 (d, *J* = 10.0 Hz), 129.9, 126.3, 125.8, 124.7, 123.3, 115.7 (d, *J* = 20.0 Hz), 110.3 (d, *J* = 4.0 Hz), 107.1 (d, *J* = 18.0 Hz), 102.6, 29.0. <sup>19</sup>F NMR (376 MHz, CDCl<sub>3</sub>): δ -118.6. IR (neat) 2921, 2851, 1656, 1601, 1508, 1474, 1392, 1374, 1303, 1238, 1100, 1029, 814, 742, 732 cm<sup>-1</sup>. HRMS (ESI-TOF) Calcd for C<sub>16</sub>H<sub>11</sub>FN<sub>2</sub>O [M+H]<sup>+</sup>: 267.0934, found:267.0929.

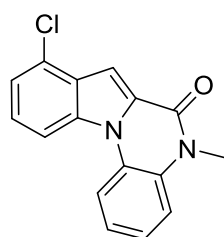

**3k**

**3-chloro-5-methylindolo[1,2-*a*]quinoxalin-6(5*H*)-one (3k).** Following the general procedure, the product was isolated by column chromatography with petroleum ether/EtOAc (4 : 1) as the eluent to give a brown solid (76 mg, 54%) (m.p. 178-180 °C). <sup>1</sup>H NMR (400 MHz, CDCl<sub>3</sub>) δ 8.21 (t, *J* = 4.0, 4.0 Hz, 1H), 8.07 (d, *J* = 8.0 Hz, 1H), 7.60 (s, 1H), 7.33-7.19 (m, 5H), 3.63 (s, 3H). <sup>13</sup>C NMR (100 MHz, CDCl<sub>3</sub>) δ 156.2, 134.5, 129.9, 128.4, 126.2, 125.6, 124.7, 123.4, 122.1, 115.7, 115.5, 112.7, 105.2, 29.0. IR (neat) 2919, 2850, 1661, 1596, 1502, 1429, 1368, 1297, 1257,

1191, 967, 811, 771, 743, 733  $\text{cm}^{-1}$ . HRMS (ESI-TOF) Calcd for  $\text{C}_{16}\text{H}_{11}\text{ClN}_2\text{O}$   $[\text{M}+\text{H}]^+$ : 283.0638, found:283.0636.

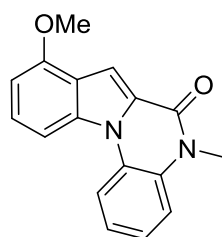

**3l**

**8-methoxy-5-methylindolo[1,2-*a*]quinoxalin-6(5*H*)-one (3l)**. Following the general procedure, the product was isolated by column chromatography with petroleum ether/EtOAc (3 : 1) as the eluent to give a brown solid (88 mg, 63%) (m.p. 193-195 °C).  $^1\text{H}$  NMR (400 MHz,  $\text{CDCl}_3$ )  $\delta$  8.22 (d,  $J = 4.0$  Hz, 1H), 7.73 (d,  $J = 8.0$  Hz, 1H), 7.63 (s, 1H), 7.24 (t,  $J = 4.0, 4.0$  Hz, 3H), 6.65 (d,  $J = 8.0$  Hz, 1H), 3.93 (s, 3H), 3.61 (s, 3H).  $^{13}\text{C}$  NMR (100 MHz,  $\text{CDCl}_3$ )  $\delta$  156.4, 154.5, 135.2, 129.9, 126.6, 126.2, 124.0, 122.9, 120.5, 115.3, 106.8, 104.2, 101.4, 55.3, 28.7. IR (neat) 2932, 1665, 1647, 1603, 1552, 1506, 1461, 1431, 1376, 1303, 1264, 1140, 1086, 1075, 769, 737  $\text{cm}^{-1}$ . HRMS (ESI-TOF) Calcd for  $\text{C}_{17}\text{H}_{14}\text{N}_2\text{O}_2$   $[\text{M}+\text{H}]^+$ : 279.1134, found:279.1127.

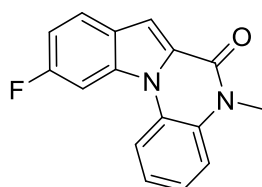

**3m**

**10-fluoro-5-methylindolo[1,2-*a*]quinoxalin-6(5*H*)-one (3m)**. Following the general procedure, the product was isolated by column chromatography with petroleum ether/EtOAc (4 : 1) as the eluent to give a brown solid (55 mg, 41%) (m.p. 233-235 °C).  $^1\text{H}$  NMR (400 MHz,  $\text{CDCl}_3$ )  $\delta$  7.97 (t,  $J = 4.0, 4.0$  Hz, 1H), 7.73-7.65 (m, 2H), 7.38 (s, 1H), 7.21-7.18 (m, 1H), 7.04-7.00 (m, 1H), 3.56 (s, 3H).  $^{13}\text{C}$  NMR (100 MHz,  $\text{CDCl}_3$ )  $\delta$  162.3, 159.9, 156.1, 133.5 (d,  $J = 12.0$  Hz), 129.8, 128.6 (d,  $J = 4.0$  Hz), 126.1, 125.5, 124.4, 124.0 (d,  $J = 11.0$  Hz), 123.1, 115.6, 114.9, 111.7 (d,  $J = 24.0$  Hz), 106.7, 100.8 (d,  $J = 28.0$  Hz), 28.8.  $^{19}\text{F}$  NMR (376 MHz,  $\text{CDCl}_3$ ):  $\delta$  -114.4.

IR (neat) 2961, 2922, 2851, 1657, 1610, 1560, 1488, 1393, 1298, 1258, 1142, 1097, 983, 821, 738, 724  $\text{cm}^{-1}$ . HRMS (ESI-TOF) Calcd for  $\text{C}_{16}\text{H}_{11}\text{FN}_2\text{O}_2$   $[\text{M}+\text{H}]^+$ : 267.0934, found:267.0932.

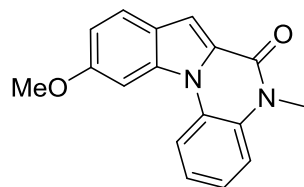

**3n**

**10-methoxy-5-methylindolo[1,2-*a*]quinoxalin-6(5*H*)-one (3n).** Following the general procedure, the product was isolated by column chromatography with petroleum ether/EtOAc (3 : 1) as the eluent to give a brown solid (90 mg, 65%) (m.p. 156-158 °C)..  $^1\text{H}$  NMR (400 MHz,  $\text{CDCl}_3$ )  $\delta$  8.14 (d,  $J = 8.0$  Hz, 1H), 7.68 (d,  $J = 8.0$  Hz, 1H), 7.56 (s, 1H), 7.43 (s, 1H), 7.25-7.19 (m, 1H), 6.97 (d,  $J = 8.0$  Hz, 1H), 3.90 (s, 3H), 3.60 (s, 3H).  $^{13}\text{C}$  NMR (100 MHz,  $\text{CDCl}_3$ )  $\delta$  156.6, 134.2, 129.8, 129.2, 128.0, 126.6, 125.3, 124.1, 123.2, 122.4, 115.6, 115.4, 114.1, 106.8, 28.9. IR (neat) 2917, 2829, 1655, 1608, 1561, 1490, 1426, 1300, 1270, 1218, 1123, 1031, 820, 800, 737, 724  $\text{cm}^{-1}$ . HRMS (ESI-TOF) Calcd for  $\text{C}_{17}\text{H}_{14}\text{N}_2\text{O}_2$   $[\text{M}+\text{H}]^+$ : 279.1134, found:279.1129.

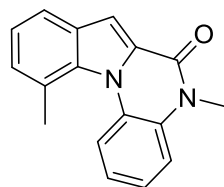

**3o**

**5,11-dimethylindolo[1,2-*a*]quinoxalin-6(5*H*)-one (3o).** Following the general procedure, the product was isolated by column chromatography with petroleum ether/EtOAc (4 : 1) as the eluent to give a brown solid (62 mg, 47%) (m.p. 136-138 °C)..  $^1\text{H}$  NMR (400 MHz,  $\text{CDCl}_3$ )  $\delta$  7.62 (t,  $J = 4.0, 4.0$  Hz, 1H), 7.44 (s, 1H), 7.41 (d,  $J = 8.0$  Hz, 1H), 7.26-7.14 (m, 5H), 3.58 (s, 3H), 2.55 (s, 3H).  $^{13}\text{C}$  NMR (100 MHz,  $\text{CDCl}_3$ )  $\delta$  158.2, 134.6, 130.7, 130.4, 129.9, 128.7, 126.3, 124.0, 123.9, 123.3, 122.1, 120.3, 119.8, 114.8, 108.3, 29.1, 22.2. IR (neat) 2921, 1622, 1504, 1452, 1403, 1301, 1261, 1098, 1050, 828, 778, 769, 729  $\text{cm}^{-1}$ . HRMS (ESI-TOF) Calcd for  $\text{C}_{17}\text{H}_{14}\text{N}_2\text{NaO}_2$   $[\text{M}+\text{Na}]^+$ : 285.0998, found:285.0988.

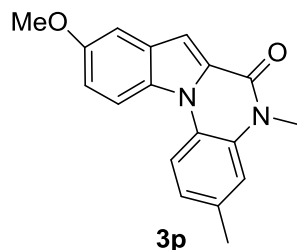

**9-methoxy-3,5-dimethylindolo[1,2-a]quinoxalin-6(5H)-one (3p).** Following the general procedure, the product was isolated by column chromatography with petroleum ether/EtOAc (3 : 1) as the eluent to give a brown solid (51 mg, 35%) (m.p. 204-206 °C). <sup>1</sup>H NMR (400 MHz, CDCl<sub>3</sub>) δ 8.06 (t, *J* = 12.0, 8.0 Hz, 2H), 7.38 (s, 1H), 7.16 (d, *J* = 4.0 Hz, 1H), 7.06(t, *J* = 8.0, 8.0 Hz, 3H), 3.84 (s, 3H), 3.61 (s, 3H), 3.39 (s, 3H). <sup>13</sup>C NMR (100 MHz, CDCl<sub>3</sub>) δ 156.5, 155.3, 133.8, 130.0, 129.6, 129.3, 128.3, 124.3, 123.7, 116.2, 116.1, 115.0, 114.8, 105.8, 103.0, 55.6, 28.9, 21.3. IR (neat) 2962, 2920, 2851, 1660, 1619, 1519, 1450, 1397, 1363, 1262, 1221, 1102, 1023, 801, 779, 743, 725 cm<sup>-1</sup>. HRMS (ESI-TOF) Calcd for C<sub>18</sub>H<sub>17</sub>N<sub>2</sub>O<sub>2</sub> [M+H]<sup>+</sup>: 293.1285, found:293.1280.

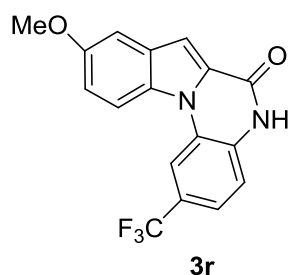

**9-methoxy-2-(trifluoromethyl)indolo[1,2-a]quinoxalin-6(5H)-one (3r).** Following the general procedure, the product was isolated by column chromatography with petroleum ether/EtOAc (2 : 1) as the eluent to give a light brown solid (50 mg, 30%). <sup>1</sup>H NMR (400 MHz, CDCl<sub>3</sub>) δ 8.26-8.20 (m, 2H), 7.38 (s, 1H), 8.13 (s, 1H), 7.62 (d, *J* = 8.0 Hz, 1H), 7.53 (s, 1H), 7.34 (s, 3H), 3.65 (s, 3H). <sup>13</sup>C NMR (100 MHz, CDCl<sub>3</sub>) δ 155.9, 135.1, 130.1, 128.7, 128.5, 127.2, 125.8 (d, *J* = 30.0 Hz), 123.6, 119.3, 116.0 (d, *J* = 24.0 Hz), 115.1, 107.0, 105.9, 99.9, 29.1. <sup>19</sup>F NMR (376 MHz, CDCl<sub>3</sub>): δ -100.0. IR (neat) 2925, 1664, 1620, 1454, 1401, 1343, 1288, 1257, 1109, 1086, 1037, 972, 837, 801, 725 cm<sup>-1</sup>. HRMS (ESI-TOF) Calcd for C<sub>17</sub>H<sub>12</sub>F<sub>3</sub>N<sub>2</sub>O<sub>2</sub> [M+H]<sup>+</sup>: 333.0851, found: 333.0853.

## 2.3 General procedure for the preparation of the 4

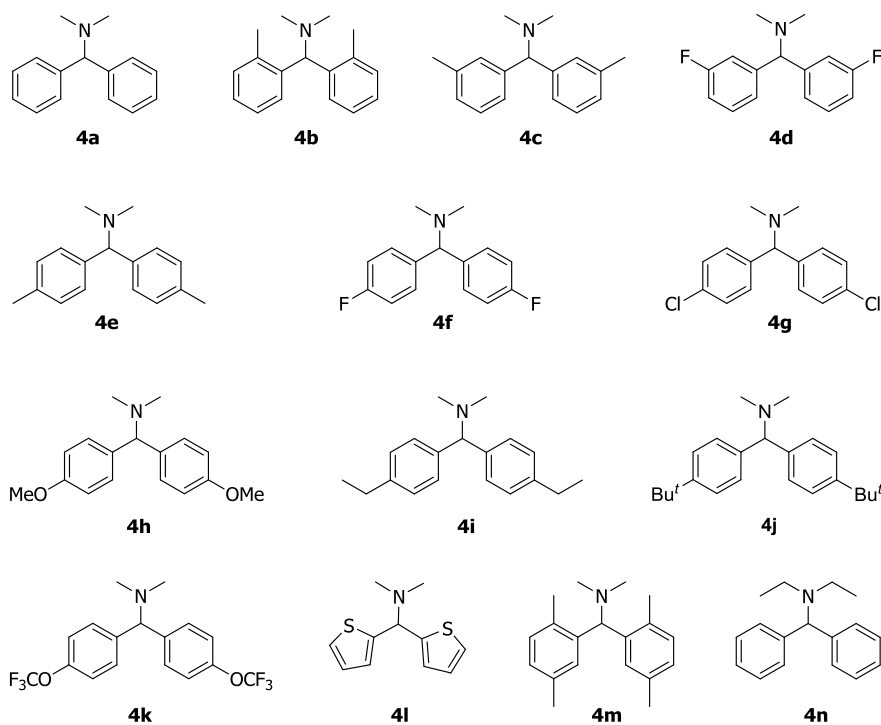

### Method C for the preparation of 4a, 4n

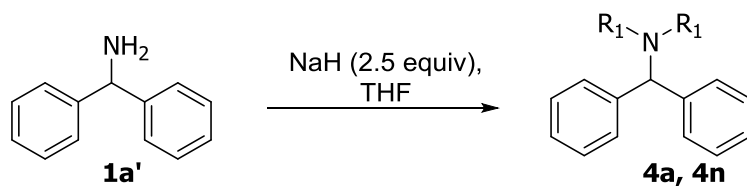

NaH (2.5 equiv) was added slowly to a cold solution of **1a'** (10 mmol, 1.0 equiv) in dry THF (15 mL) under N<sub>2</sub>, after being stirred at room temperature for 2 h, alkyl iodide (2.2 equiv) was then added. The mixture was heated to 30 °C and stirred for 12 h. After being stirred at 30 °C for 12 h, the reaction mixture was quenched with sat. aq. NH<sub>4</sub>Cl, and extracted with EtOAc. The combined organic layer was washed with brine and dried over Na<sub>2</sub>SO<sub>4</sub>, filtered and concentrated under reduce pressure to give crude product. The residue was purified by column chromatography on silica gel to afford the **4a** and **4n**.

### Method D for the preparation of 4b-4k, 4m<sup>5</sup>

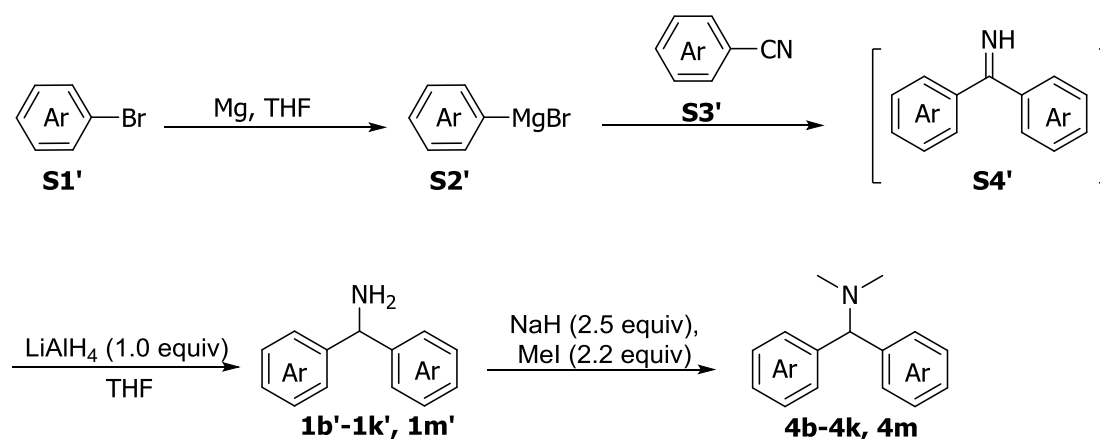

To a flame-dried 100 mL three-necked round-bottomed flask, magnesium (20 mmol, 2.0 equiv.) and a few crystals of iodine was added. Fill the flask with argon and equip with a refluxing condenser, THF (30 mL) was added through a syringe. Then added the corresponding aryl halide **S1'** (12 mmol, 1.2 equiv.) slowly. The mixture was slowly heated to reflux under an argon atmosphere and kept at reflux for 3 h. The resulting light brown solution was allowed cooling to room temperature and then the corresponding aryl nitrile **S3'** (10 mmol in 10 mL THF, 1.0 equiv.) was added. The reaction mixture was heated to reflux for 24 h and then cooled to 0 °C. To this mixture was transferred a suspension of  $\text{LiAlH}_4$  (10 mmol, 1.0 equiv) in THF (20 mL) and heated to reflux, which was maintained for 12 h. The reaction mixture was cooled to 0 °C, and carefully quenched by slow addition of water (1 mL), then 10 % aq NaOH (1 mL), and finally water (2 mL). The mixture was filtered through a Celite pad and washed with DCM. The combined organic layer was washed with brine and dried over  $\text{Na}_2\text{SO}_4$ , filtered and concentrated under reduce pressure to afford **1b'-1k', 1m'**, which could be used directly in the next step without further purification.

$\text{NaH}$  (2.5 equiv) was added slowly to a cold solution of **1b'-1k', 1m'** in dry THF (15 mL) under  $\text{N}_2$ , after being stirred at room temperature for 2 h,  $\text{MeI}$  (2.2 equiv) was then added. The mixture was heated to 30 °C and stirred for 12 h. After being stirred at 30 °C for 12 h, the reaction mixture was quenched with sat. aq.  $\text{NH}_4\text{Cl}$ , and extracted with EtOAc. The combined organic layer was washed with brine and dried over  $\text{Na}_2\text{SO}_4$ , filtered and concentrated under reduce pressure. The residue was purified by column chromatography on silica gel to afford the **4b'-4k', 4m'**.

### Method E for the preparation of **4I**<sup>5</sup>

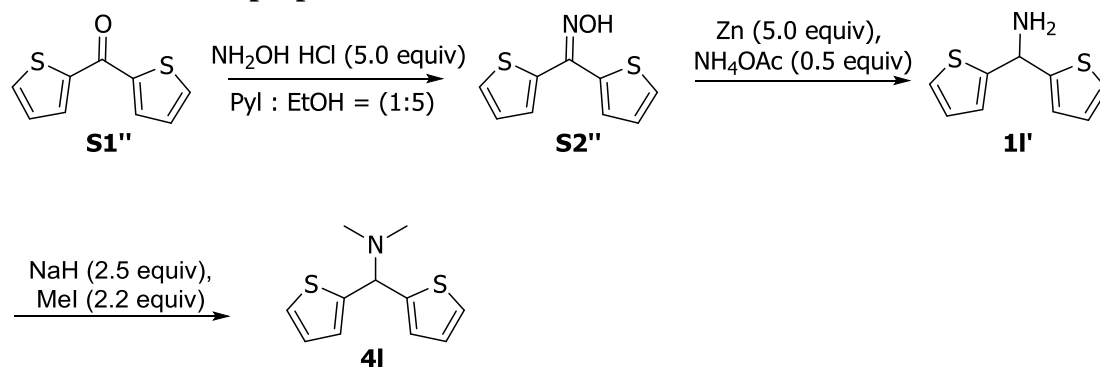

To a 100 mL pressure vessel was added the ketone **S1''** (10 mmol, 1.0 equiv), hydroxylamine hydrochloride (5.0 equiv), pyridine and EtOH (1:5). The flask was sealed and the solution was heated to reflux for 10 h. After completion, the solvent was removed under reduced pressure and the residue was partitioned between EtOAc and  $\text{H}_2\text{O}$ . The aqueous layer was extracted with EtOAc and washed with brine and dried over  $\text{Na}_2\text{SO}_4$ , filtered and concentrated under reduce pressure to give crude product **S2''**, which could be used directly in the next step without further purification.

To a stirred suspension of oxime **S2''** in EtOH and concentrated ammonia solution (1:4) was added  $\text{NH}_4\text{OAc}$  (0.5 equiv), followed by portion-wise addition of zinc powder (5.0 equiv). The mixture was heated to  $50^\circ\text{C}$  and once the vigorous bubbling stopped, the solution was heated to reflux for 8 h. The mixture was then cooled to room temperature and diluted with EtOAc, stirred for 30 min and filtered. The filtrate was transferred to a separation funnel, the organic layer was collected and the aqueous layer was extracted with EtOAc. The combined organic layer was dried over  $\text{Na}_2\text{SO}_4$ , concentrated under reduce pressure to give the crude amine **1I'**, which could be used directly in the next step without further purification.

$\text{NaH}$  (2.5 equiv) was added slowly to a cold solution of crude amine **1I'** in dry THF (15 mL) under  $\text{N}_2$ , after being stirred at room temperature for 2 h,  $\text{MeI}$  (2.2 equiv) was then added. The mixture was heated to  $30^\circ\text{C}$  and stirred for 12 h. After being stirred at  $30^\circ\text{C}$  for 12 h, the reaction mixture was quenched with sat. aq.  $\text{NH}_4\text{Cl}$ , and extracted with EtOAc. The combined organic layer was washed with brine and dried over  $\text{Na}_2\text{SO}_4$ , filtered and concentrated under reduce pressure to give crude product.



The residue was purified by column chromatography on silica gel to afford the **4l**.

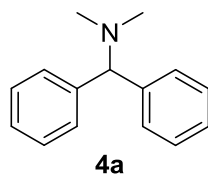

***N,N*-Dimethyl-1,1-diphenylmethanamine (4a)**<sup>6</sup>. Following the general procedure, the product was isolated by column chromatography with petroleum ether/EtOAc (20 : 1) as the eluent to give a white solid (1.05 g, 50%). <sup>1</sup>H NMR (400 MHz, CDCl<sub>3</sub>) δ 7.36 (d, *J* = 8.0 Hz, 4H), 7.20 (t, *J* = 8.0, 8.0 Hz, 4H), 7.10 (t, *J* = 8.0, 4.0 Hz, 3H), 3.98 (s, 1H), 2.12 (s, 6H). <sup>13</sup>C NMR (100 MHz, CDCl<sub>3</sub>) δ 143.4, 128.4, 127.7, 126.9, 78.0, 44.7. HRMS (ESI-TOF) Calcd for C<sub>15</sub>H<sub>18</sub>N [M+H]<sup>+</sup>: 212.1434, found: 212.1443.

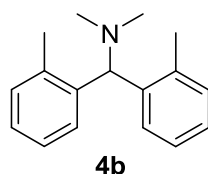

***N,N*-Dimethyl-1,1-di-*o*-tolylmethanamine (4b)**. Following the general procedure, the product was isolated by column chromatography with petroleum ether/EtOAc (20 : 1) as the eluent to give a pale yellow solid (0.96 g, 40%). <sup>1</sup>H NMR (400 MHz, CDCl<sub>3</sub>) δ 7.52 (d, *J* = 8.0 Hz, 2H), 7.09 (d, *J* = 4.0 Hz, 2H), 7.01 (t, *J* = 4.0 Hz, 4H), 4.51 (s, 1H), 2.27 (s, 6H), 2.15 (s, 6H). <sup>13</sup>C NMR (100 MHz, CDCl<sub>3</sub>) δ 140.5, 136.2, 130.3, 128.7, 128.6, 126.3, 126.0, 67.1, 44.2, 20.1. HRMS (ESI-TOF) Calcd for C<sub>17</sub>H<sub>21</sub>N [M+H]<sup>+</sup>: 240.1747, found: 240.1753.

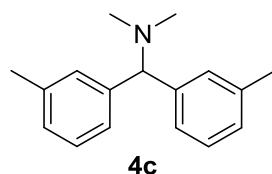

***N,N*-Dimethyl-1,1-di-*m*-tolylmethanamine (4c)**. Following the general procedure, the product was isolated by column chromatography with petroleum ether/EtOAc (20 : 1) as the eluent to give a pale yellow oil (1.02 g, 43%). <sup>1</sup>H NMR (400 MHz, CDCl<sub>3</sub>) δ 7.16 (d, *J* = 8.0 Hz, 4H), 7.09 (t, *J* = 8.0 Hz, 2H), 7.90 (d, *J* = 8.0 Hz, 2H), 3.88 (s, 1H), 2.22 (s, 6H), 2.11 (s, 6H). <sup>13</sup>C NMR (100 MHz, CDCl<sub>3</sub>) δ 143.4, 138.0, 128.3,

127.6, 124.8, 78.2, 44.9, 21.5. HRMS (ESI-TOF) Calcd for C<sub>17</sub>H<sub>22</sub>N [M+H]<sup>+</sup>: 240.1747, found: 240.1753.

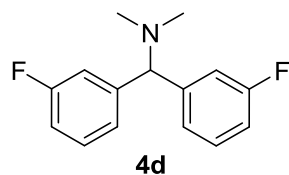

**1,1-bis(3-fluorophenyl)-N,N-dimethylmethanamine (4d)**. Following the general procedure, the product was isolated by column chromatography with petroleum ether/EtOAc (20 : 1) as the eluent to give a pale yellow oil (0.98 g, 40%). <sup>1</sup>H NMR (400 MHz, CDCl<sub>3</sub>) δ 7.18-7.14 (m, 2H), 7.10 (t, *J* = 8.0, 12.0 Hz, 4H), 6.83-6.79 (m, 2H), 3.99 (s, 1H), 2.11 (s, 6H). <sup>13</sup>C NMR (100 MHz, CDCl<sub>3</sub>) δ 164.2, 161.7, 145.5, 145.4, 130.0, 129.9, 123.3, 114.6, 114.3, 114.1, 113.9, 44.4. <sup>19</sup>F NMR (376 MHz, CDCl<sub>3</sub>) δ -112.8. HRMS (ESI-TOF) Calcd for C<sub>15</sub>H<sub>16</sub>F<sub>2</sub>N [M+H]<sup>+</sup>: 248.1245, found: 248.1255.

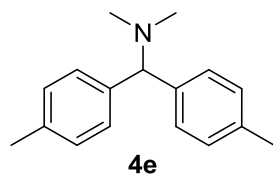

**N,N-Dimethyl-1,1-di-*p*-tolylmethanamine (4e)**<sup>7</sup>. Following the general procedure, the product was isolated by column chromatography with petroleum ether/EtOAc (20 : 1) as the eluent to give a pale yellow solid (1.26 g, 53%). <sup>1</sup>H NMR (400 MHz, CDCl<sub>3</sub>) δ 7.22 (d, *J* = 4.0 Hz, 4H), 7.00 (d, *J* = 8.0 Hz, 4H), 3.91 (s, 1H), 2.19 (s, 6H), 2.11 (s, 6H). <sup>13</sup>C NMR (100 MHz, CDCl<sub>3</sub>) δ 140.7, 136.3, 129.1, 127.5, 44.7, 21.0. HRMS (ESI-TOF) Calcd for C<sub>17</sub>H<sub>22</sub>N [M+H]<sup>+</sup>: 240.1747, found: 240.1756.

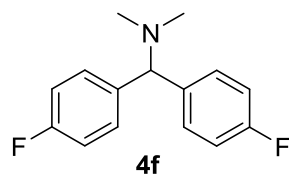

**1,1-bis(4-fluorophenyl)-N,N-dimethylmethanamine (4f)**<sup>8</sup>. Following the general procedure, the product was isolated by column chromatography with petroleum ether/EtOAc (20 : 1) as the eluent to give a pale yellow solid (1.23 g, 50%). <sup>1</sup>H NMR (400 MHz, CDCl<sub>3</sub>) δ 7.29-7.26 (m, 4H), 6.91-6.86. (t, *J* = 8.0, 12.0 Hz, 4H) 3.98 (s,

1H), 2.09 (s, 6H).  $^{13}\text{C}$  NMR (100 MHz,  $\text{CDCl}_3$ )  $\delta$  163.0, 160.5, 138.9, 138.9, 129.0, 115.4, 115.2, 44.5.  $^{19}\text{F}$  NMR (376 MHz,  $\text{CDCl}_3$ ):  $\delta$  -115.8. HRMS (ESI-TOF) Calcd for  $\text{C}_{15}\text{H}_{16}\text{F}_2\text{N}$   $[\text{M}+\text{H}]^+$ : 248.1245, found: 248.1255.

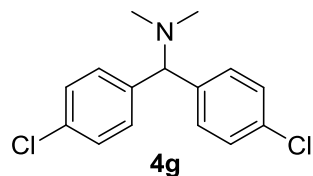

***N,N*-Dimethyl[bis(4-chlorophenyl)methyl]amine (4g)**<sup>9</sup>. Following the general procedure, the product was isolated by column chromatography with petroleum ether/EtOAc (20 : 1) as the eluent to give a pale white solid (1.54 g, 55%).  $^1\text{H}$  NMR (400 MHz,  $\text{CDCl}_3$ )  $\delta$  7.24 (d,  $J$  = 8.0 Hz, 4H), 7.17 (d,  $J$  = 8.0 Hz, 4H), 3.95 (s, 1H), 2.07 (s, 6H).  $^{13}\text{C}$  NMR (100 MHz,  $\text{CDCl}_3$ )  $\delta$  141.5, 132.7, 129.0, 128.9, 128.8, 128.7, 128.6, 44.4. HRMS (ESI-TOF) Calcd for  $\text{C}_{15}\text{H}_{16}\text{Cl}_2\text{N}$   $[\text{M}+\text{H}]^+$ : 280.0654, found: 280.0668.

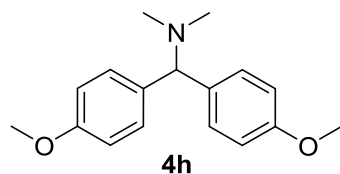

**1,1-bis(4-methoxyphenyl)-*N,N*-dimethylmethanamine (4h)**<sup>7</sup>. Following the general procedure, the product was isolated by column chromatography with petroleum ether/EtOAc (10 : 1) as the eluent to give a white solid (1.13 g, 42%).  $^1\text{H}$  NMR (400 MHz,  $\text{CDCl}_3$ )  $\delta$  7.24 (d,  $J$  = 8.0 Hz, 4H), 6.74 (d,  $J$  = 8.0 Hz, 4H), 3.90 (s, 1H), 3.67 (s, 6H), 2.10 (s, 6H).  $^{13}\text{C}$  NMR (100 MHz,  $\text{CDCl}_3$ )  $\delta$  158.4, 135.9, 128.6, 113.8, 76.5, 55.1, 44.6. HRMS (ESI-TOF) Calcd for  $\text{C}_{17}\text{H}_{22}\text{NO}_2$   $[\text{M}+\text{H}]^+$ : 272.1645, found: 272.1652.

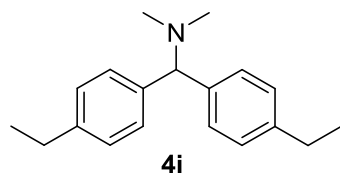

**1,1-bis(4-ethylphenyl)-*N,N*-dimethylmethanamine (4i)**. Following the general procedure, the product was isolated by column chromatography with petroleum ether/EtOAc (20 : 1) as the eluent to give a pale yellow oil (1.18 g, 45%).  $^1\text{H}$  NMR

(400 MHz, CDCl<sub>3</sub>)  $\delta$  7.25 (t,  $J$  = 4.0 Hz, 4H), 7.00 (d,  $J$  = 4.0 Hz, 4H), 3.91 (s, 1H), 2.50-2.45 (m, 4H), 2.09 (s, 6H), 1.10-1.06 (m, 6H). <sup>13</sup>C NMR (100 MHz, CDCl<sub>3</sub>)  $\delta$  142.6, 141.0, 127.9, 127.6, 44.8, 28.4, 15.4. HRMS (ESI-TOF) Calcd for C<sub>19</sub>H<sub>26</sub>N [M+H]<sup>+</sup>: 268.2060, found: 268.2071.

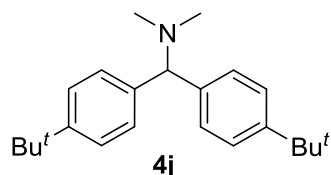

**1,1-bis(4-(*tert*-butyl)phenyl)-*N,N*-dimethylmethanamine (4j).** Following the general procedure, the product was isolated by column chromatography with petroleum ether/EtOAc (15 : 1) as the eluent to give a pale yellow solid (0.97 g, 30%). <sup>1</sup>H NMR (400 MHz, CDCl<sub>3</sub>)  $\delta$  7.28 (d,  $J$  = 8.0 Hz, 4H), 7.21(d,  $J$  = 8.0 Hz, 4H), 3.91 (s, 1H), 2.10 (s, 6H), 1.20 (s, 18H). <sup>13</sup>C NMR (100 MHz, CDCl<sub>3</sub>)  $\delta$  149.4, 140.5, 127.3, 125.2, 44.8, 34.3, 31.4, 31.3. HRMS (ESI-TOF) Calcd for C<sub>23</sub>H<sub>34</sub>N [M+H]<sup>+</sup>: 324.2686, found: 324.2688.

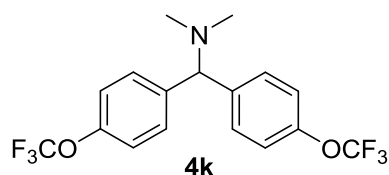

***N,N*-Dimethyl-1,1-bis(4-(trifluoromethoxy)phenyl)methanamine (4k).** Following the general procedure, the product was isolated by column chromatography with petroleum ether/EtOAc (10 : 1) as the eluent to give a pale yellow solid (1.25 g, 33%). <sup>1</sup>H NMR (400 MHz, CDCl<sub>3</sub>)  $\delta$  7.32 (d,  $J$  = 8.0 Hz, 4H), 7.03(d,  $J$  = 8.0 Hz, 4H), 4.00 (s, 1H), 2.05 (s, 6H). <sup>13</sup>C NMR (100 MHz, CDCl<sub>3</sub>)  $\delta$  148.2 (d,  $J$  = 2.0 Hz), 141.5, 128.9, 124.3 (d,  $J$  = 255.0 Hz), 121.3, 120.9, 119.2 (d,  $J$  = 256.0 Hz), 44.3. <sup>19</sup>F NMR (376 MHz, CDCl<sub>3</sub>)  $\delta$  -58.0. HRMS (ESI-TOF) Calcd for C<sub>17</sub>H<sub>16</sub>F<sub>6</sub>NO<sub>2</sub> [M+H]<sup>+</sup>: 380.1080, found: 380.1090.

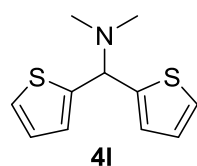

***N,N*-Dimethyl-1,1-di(4-(thiophen-2-yl)methanamine (4l).** Following the general

procedure, the product was isolated by column chromatography with petroleum ether/EtOAc (20 : 1) as the eluent to give a light brown solid (0.67 g, 30%).  $^1\text{H}$  NMR (400 MHz,  $\text{CDCl}_3$ )  $\delta$  7.19 (t,  $J = 4.0$  Hz, 2H), 6.88 (d,  $J = 4.0$  Hz, 4H), 4.96 (s, 1H), 2.20 (s, 6H).  $^{13}\text{C}$  NMR (100 MHz,  $\text{CDCl}_3$ )  $\delta$  144.6, 126.3, 126.1, 125.1, 66.0, 42.8. HRMS (ESI-TOF) Calcd for  $\text{C}_{11}\text{H}_{14}\text{NS}_2$   $[\text{M}+\text{H}]^+$ : 224.0562, found: 224.0572.

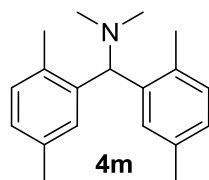

**1,1-bis(2,5-dimethylphenyl)-*N,N*-dimethylmethanamine (4m).** Following the general procedure, the product was isolated by column chromatography with petroleum ether/EtOAc (15 : 1) as the eluent to give a pale yellow solid (0.85 g, 32%).  $^1\text{H}$  NMR (400 MHz,  $\text{CDCl}_3$ )  $\delta$  7.33 (s, 2H), 6.90 (d,  $J = 8.0$  Hz, 2H), 6.83 (d,  $J = 8.0$  Hz, 2H), 4.44 (s, 1H), 2.23 (d,  $J = 8.0$  Hz, 12H), 2.15 (s, 6H).  $^{13}\text{C}$  NMR (100 MHz,  $\text{CDCl}_3$ )  $\delta$  140.2, 135.3, 133.0, 130.1, 129.0, 127.1, 67.0, 44.3, 21.2, 19.7. HRMS (ESI-TOF) Calcd for  $\text{C}_{19}\text{H}_{26}\text{N}$   $[\text{M}+\text{H}]^+$ : 268.2060, found: 268.2069.

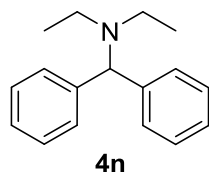

***N*-benzhydryl-*N*-ethylethanamine (4n)<sup>10</sup>.** Following the general procedure, the product was isolated by column chromatography with petroleum ether/EtOAc (20 : 1) as the eluent to give a pale yellow oil (0.59 g, 25%).  $^1\text{H}$  NMR (400 MHz,  $\text{CDCl}_3$ )  $\delta$  7.35 (d,  $J = 4.0$  Hz, 4H), 7.20-7.17 (m, 4H), 7.11 (t,  $J = 8.0$  Hz, 2H), 4.64 (s, 1H), 2.50 (d,  $J = 8.0$  Hz, 4H), 0.92 (t,  $J = 8.0, 4.0$  Hz, 6H).  $^{13}\text{C}$  NMR (100 MHz,  $\text{CDCl}_3$ )  $\delta$  143.3, 128.1, 128.0, 126.5, 71.2, 42.7, 10.9. HRMS (ESI-TOF) Calcd for  $\text{C}_{17}\text{H}_{22}\text{N}$   $[\text{M}+\text{H}]^+$ : 240.1747, found: 240.1759.

## 2.4 General procedure for the preparation of the 5

### Optimization of Reaction Conditions

**General optimization procedure:** In an oven-dried Schlenk tube equipped with a stir-bar, **4a** (0.1 mmol, 1.0 equiv), Pd catalyst (10 mol %), Cu salts (30 mol %), ligand

(30 mol %), additive (1.0 equiv) were combined. A balloon filled V(CO)/V(O<sub>2</sub>) (1 atm) was connected to the Schlenk tube via the side tube and purged for 3 times. Then solvent (1.2 mL) were added to the tube via a syringe. The reaction mixture was heated and determined by GC-MS. (**Caution:** the O<sub>2</sub> cylinder and CO cylinder should be stored separately. Damage to the cylinder such as a broken valve, can trigger a sudden and very rapid loss of containment. For CO in air, the explosion range is generally given as 12.5 % v/v to 74.2 % v/v CO with a minimum ignition temperature of ~605 °C).

**Table S1.** Screening of Pd catalyst in this reaction<sup>a</sup>

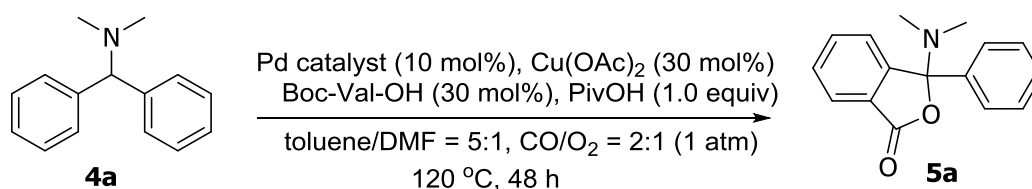

| Entry | Pd catalyst          | Yield (%) <sup>b</sup> |
|-------|----------------------|------------------------|
| 1     | none                 | ND <sup>c</sup>        |
| 2     | Pd(OAc) <sub>2</sub> | trace                  |
| 3     | Pd(TFA) <sub>2</sub> | trace                  |
| 4     | PdCl <sub>2</sub>    | 70                     |

<sup>a</sup>Experiments were performed with **4a** (0.1 mmol, 1.0 equiv), Pd catalyst (10 mol %), Cu(OAc)<sub>2</sub> (30 mol %), Boc-Val-OH (30 mol %), PivOH (1.0 equiv), toluene/DMF = 5:1 (1.2 mL), V(CO)/V(O<sub>2</sub>) = 2:1 (1 atm), 120 °C, 48 h. <sup>b</sup>Determined by GC-MS. <sup>c</sup>ND = not determined.

**Table S2.** Screening of Cu salts in this reaction<sup>a</sup>

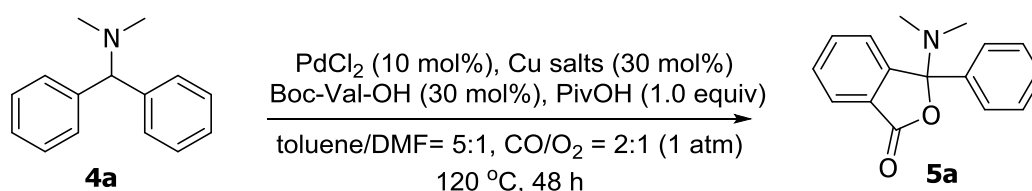

| Entry | Cu salts             | Yield (%) <sup>b</sup> |
|-------|----------------------|------------------------|
| 1     | none                 | ND <sup>c</sup>        |
| 2     | Cu(OAc) <sub>2</sub> | 70                     |

|   |                       |       |
|---|-----------------------|-------|
| 3 | CuCl <sub>2</sub>     | trace |
| 4 | CuBr <sub>2</sub>     | trace |
| 5 | CuF <sub>2</sub>      | trace |
| 6 | CuO                   | trace |
| 7 | CuSO <sub>4</sub>     | 35    |
| 8 | Cu(OTf) <sub>2</sub>  | trace |
| 9 | Cu(acac) <sub>2</sub> | 45    |

<sup>a</sup>Experiments were performed with **4a** (0.1 mmol, 1.0 equiv), PdCl<sub>2</sub> (10 mol %), Cu salts (30 mol %), Boc-Val-OH (30 mol %), PivOH (1.0 equiv), toluene/DMF = 5:1 (1.2 mL), V(CO)/V(O<sub>2</sub>) = 2:1 (1 atm), 120 °C, 48 h. <sup>b</sup>Determined by GC-MS. <sup>c</sup>ND = not determined.

**Table S3.** Screening of additives in this reaction<sup>a</sup>

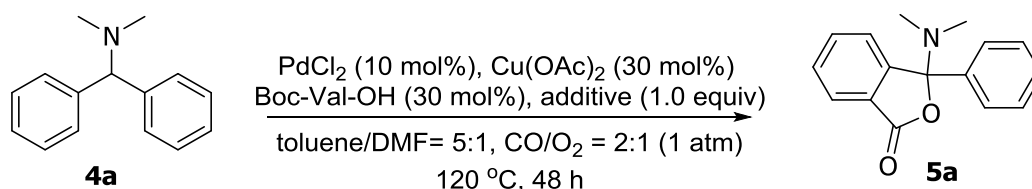

| Entry | Additive                        | Yield (%) <sup>b</sup> |
|-------|---------------------------------|------------------------|
| 1     | none                            | 42                     |
| 2     | PivOH                           | 70                     |
| 3     | Cs <sub>2</sub> CO <sub>3</sub> | ND <sup>c</sup>        |
| 4     | AcOH                            | 55                     |
| 5     | AdOH                            | 45                     |

<sup>a</sup> Experiments were performed with **4a** (0.1 mmol, 1.0 equiv), PdCl<sub>2</sub> (10 mol %), Cu(OAc)<sub>2</sub> (30 mol %), Boc-Val-OH (30 mol %), additive (1.0 equiv), toluene/DMF = 5:1 (1.2 mL), V(CO)/V(O<sub>2</sub>) = 2:1 (1 atm), 120 °C, 48 h. <sup>b</sup>Determined by GC-MS. <sup>c</sup>ND = not determined.

**Table S4.** Screening of oxidants in this reaction<sup>a</sup>

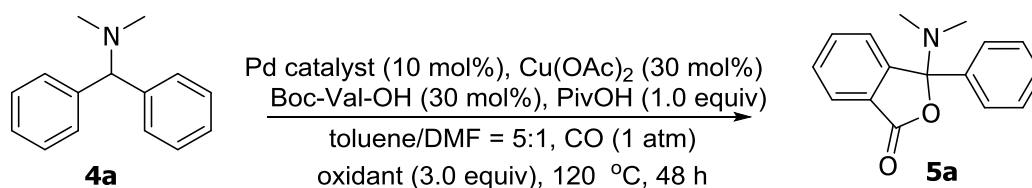

| Entry | Oxidant | Yield (%) <sup>b</sup> |
|-------|---------|------------------------|
| 1     | none    | 8                      |

|                |                                              |       |
|----------------|----------------------------------------------|-------|
| 2 <sup>c</sup> | O <sub>2</sub>                               | 70    |
| 3              | AgAc                                         | trace |
| 4              | Ag <sub>2</sub> CO <sub>3</sub>              | trace |
| 5              | m-CPBA                                       | trace |
| 6              | K <sub>2</sub> S <sub>2</sub> O <sub>8</sub> | trace |
| 7              | NFSI                                         | trace |
| 8              | BiCl <sub>3</sub>                            | trace |
| 9              | Mn(OAc) <sub>2</sub> 4H <sub>2</sub> O       | 15    |

<sup>a</sup>Experiments were performed with **4a** (0.1 mmol, 1.0 equiv), PdCl<sub>2</sub> (10 mol %), Cu(OAc)<sub>2</sub> (30 mol %), Boc-Val-OH (30 mol %), PivOH (1.0 equiv), toluene/DMF = 5:1 (1.2 mL), CO (1 atm), Oxidant (3.0 equiv), 120 °C, 48 h. <sup>b</sup>Determined by GC-MS. <sup>c</sup>V(CO)/V(O<sub>2</sub>) = 2:1 (1 atm).

**Table S5.** Screening of solvents in this reaction<sup>a</sup>

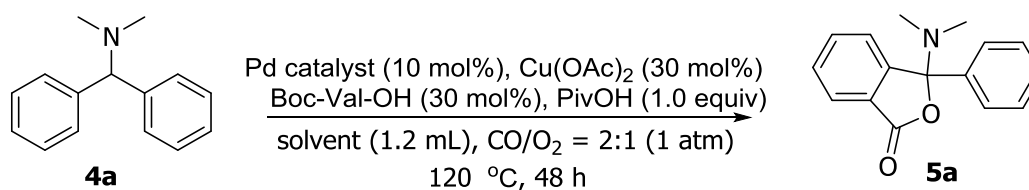

| Entry | Solvent               | Yield (%) <sup>b</sup> |
|-------|-----------------------|------------------------|
| 1     | Toluene/DMF = 5:1     | 70                     |
| 2     | Toluene               | trace                  |
| 3     | Toluene/Dioxane = 5:1 | 80                     |
| 4     | i-PrOH                | trace                  |
| 5     | Toluene/DMSO = 5:1    | 30                     |
| 6     | Toluene/DMA = 5:1     | 35                     |

<sup>a</sup>Experiments were performed with **4a** (0.1 mmol, 1.0 equiv), PdCl<sub>2</sub> (10 mol %), Cu(OAc)<sub>2</sub> (30 mol %), Boc-Val-OH (30 mol %), PivOH (1.0 equiv), Solvent (1.2 mL), V(CO)/V(O<sub>2</sub>) = 2:1 (1 atm), 120 °C, 48 h. <sup>b</sup>Determined by GC-MS.

**Table S6.** The effect of temperature on this reaction<sup>a</sup>

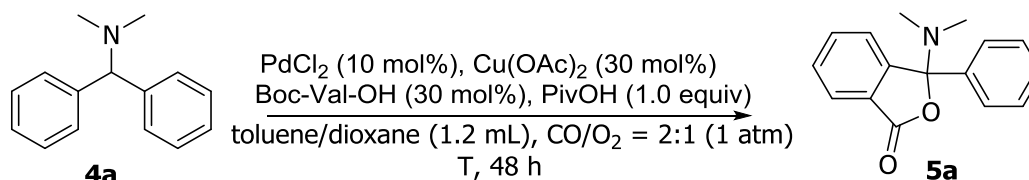

| Entry | T (°C) | Yield (%) <sup>b</sup> |
|-------|--------|------------------------|
| 1     | 120    | 80                     |
| 2     | 110    | 82                     |



|                |     |    |
|----------------|-----|----|
| 3 <sup>c</sup> | 100 | 90 |
| 4 <sup>c</sup> | 90  | 55 |
| 5 <sup>c</sup> | 80  | 45 |

<sup>a</sup>Experiments were performed with **4a** (0.1 mmol, 1.0 equiv), PdCl<sub>2</sub> (10 mol %), Cu(OAc)<sub>2</sub> (30 mol %), Boc-Val-OH (30 mol %), PivOH (1.0 equiv), toluene/dioxane = 5:1 (1.2 mL), V(CO)/V(O<sub>2</sub>) = 2:1 (1 atm), T, 48 h. <sup>b</sup>Determined by GC-MS. <sup>c</sup>60 h.

**Table S7.** Screening of Ligands in this reaction<sup>a</sup>

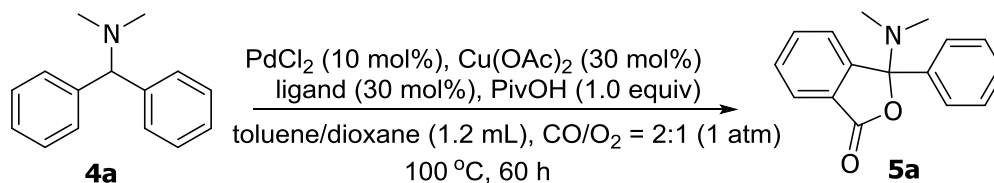

| Entry | Ligand      | Yield (%) <sup>b</sup> |
|-------|-------------|------------------------|
| 1     | none        | 35                     |
| 2     | Boc-Val-OH  | 90                     |
| 3     | Boc-Phe-OH  | 80                     |
| 4     | Fomc-Val-OH | 72                     |
| 5     | Ac-Leu-OH   | 76                     |

<sup>a</sup>Experiments were performed with **4a** (0.1 mmol, 1.0 equiv), PdCl<sub>2</sub> (10 mol %), Cu(OAc)<sub>2</sub> (30 mol %), ligand (30 mol %), PivOH (1.0 equiv), toluene/dioxane = 5:1 (1.2 mL), V(CO)/V(O<sub>2</sub>) = 2:1 (1 atm), 100 °C, 60 h. <sup>b</sup> Determined by GC-MS.

**Table S8.** The effect of the partial pressures ratio on this reaction<sup>a</sup>

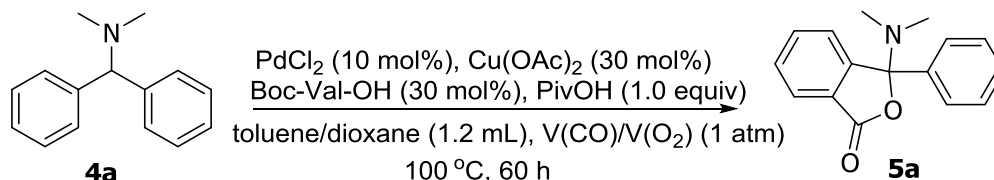

| Entry | Ratio of V(CO)/V(O <sub>2</sub> ) | Yield (%) <sup>b</sup> |
|-------|-----------------------------------|------------------------|
| 1     | 1:1                               | 46                     |
| 2     | 2:1                               | 90                     |
| 3     | 4:1                               | 35                     |

<sup>a</sup>Experiments were performed with **4a** (0.1 mmol, 1.0 equiv), PdCl<sub>2</sub> (10 mol %), Cu(OAc)<sub>2</sub> (30 mol %), Boc-Val-OH (30 mol %), PivOH (1.0 equiv), toluene/dioxane = 5:1 (1.2 mL), V(CO)/V(O<sub>2</sub>) (1 atm), 100 °C, 60 h. <sup>b</sup> Determined by GC-MS.

**Table S9.** The effect of the amount of H<sub>2</sub>O on this reaction<sup>a</sup>

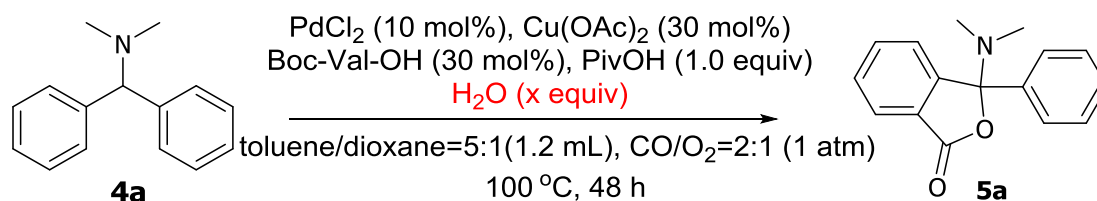

| Entry | Equivalent of additive H <sub>2</sub> O | Yield (%) <sup>b</sup> |
|-------|-----------------------------------------|------------------------|
| 1     | none                                    | 72                     |
| 2     | 5                                       | 37                     |
| 3     | 10                                      | 17                     |
| 4     | 15                                      | <10                    |

<sup>a</sup>Experiments were performed with **4a** (0.1 mmol, 1.0 equiv), PdCl<sub>2</sub> (10 mol %), Cu(OAc)<sub>2</sub> (30 mol %), Boc-Val-OH (30 mol %), PivOH (1.0 equiv), toluene/dioxane = 5:1 (1.2 mL), V(CO)/V(O<sub>2</sub>) = 2:1 (1 atm), H<sub>2</sub>O (x equiv), 100 °C, 48 h. <sup>b</sup>Determined by GC-MS.

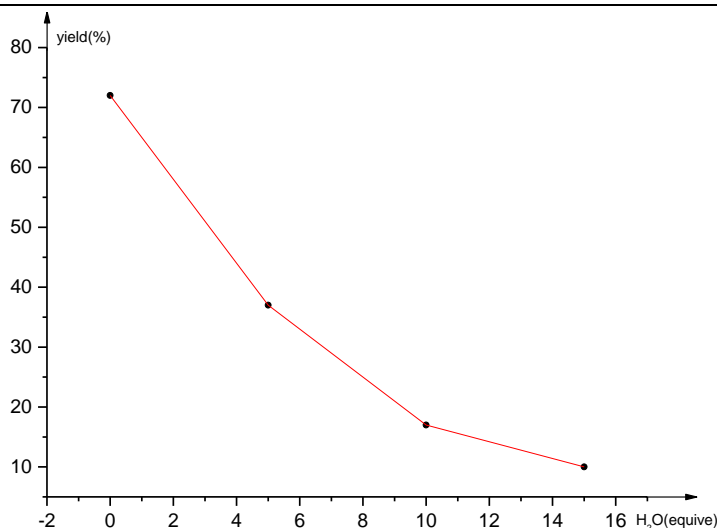

Figure S1. Yield of **5a** with assistance of H<sub>2</sub>O under the standard reaction conditions

### General Procedure for the preparation of the desired products **5**

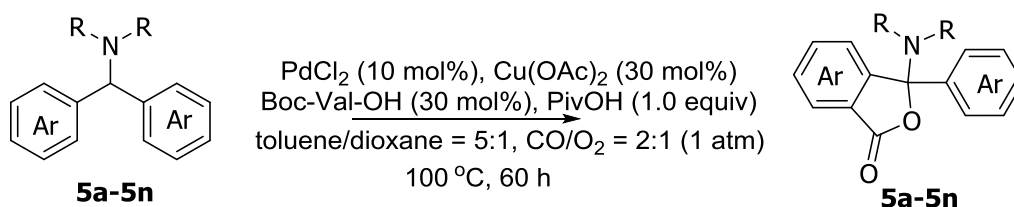

In an oven-dried Schlenk tube equipped with a stir-bar, **4a-4n** (0.5 mmol, 1.0 equiv), PdCl<sub>2</sub> (10 mol %), Cu(OAc)<sub>2</sub> (30 mol %), Boc-Val-OH (30 mol %), PivOH (1.0 equiv) were combined. A balloon filled V(CO)/V(O<sub>2</sub>) = (2:1) (1 atm) was connected to the Schlenk tube via the side tube and purged for 3 times. Then toluene/dioxane = 5:1 (3.0 mL) were added to the tube via a syringe. The Schlenk tube was heated at 100 °C for 60 h, then cooled to room temperature. The reaction was quenched by aq. brine and extracted with EtOAc. The combined organic layer were washed with brine and dried over anhydrous Na<sub>2</sub>SO<sub>4</sub>, filtered and concentrated under reduce pressure. The

residue was purified by column chromatography on silica gel to afford the corresponding products **5a-5n**.

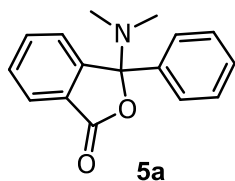

**3-(dimethylamino)-3-phenylisobenzofuran-1(3H)-one (5a)**. Following the general procedure, the product was isolated by column chromatography with petroleum ether/EtOAc (4 : 1) as the eluent to give a pale yellow solid (82 mg, 65%) (m.p. 74-76 °C). <sup>1</sup>H NMR (400 MHz, CDCl<sub>3</sub>) δ 7.76 (d, *J* = 8.0 Hz, 2H), 7.62 (d, *J* = 8.0 Hz, 2H), 7.52-7.35 (m, 3H), 7.28-7.19 (m, 3H), 2.23 (s, 6H). <sup>13</sup>C NMR (100 MHz, CDCl<sub>3</sub>) δ 169.9, 150.7, 140.3, 134.3, 129.6, 128.8, 128.5, 125.9, 125.6 (d, *J* = 2.0 Hz), 123.0, 107.1, 38.8. IR (neat) 1757, 1604, 1461, 1280, 1238, 1096, 1056, 865, 797, 768, 700 cm<sup>-1</sup>. HRMS (ESI-TOF) Calcd for C<sub>16</sub>H<sub>16</sub>NO<sub>2</sub> [M+H]<sup>+</sup>: 254.1185, found: 254.1176. The absolute configuration is assigned based on the X-ray crystallographic data of compound **5a**.

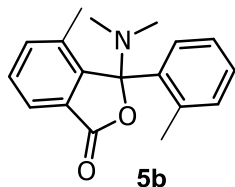

**3-(dimethylamino)-4-methyl-3-(*o*-tolyl)isobenzofuran-1(3H)-one (5b)**. Following the general procedure, the product was isolated by column chromatography with petroleum ether/EtOAc (4 : 1) as the eluent to give a light brown solid (63 mg, 45%) (m.p. 114-116 °C). <sup>1</sup>H NMR (400 MHz, CDCl<sub>3</sub>) δ 8.00 (d, *J* = 8.0 Hz, 1H), 7.69 (d, *J* = 4.0 Hz, 1H), 7.36 (t, *J* = 8.0 Hz, 1H), 7.24-7.19 (m, 2H), 7.15-7.12 (m, 1H), 6.99 (d, *J* = 8.0, 1H), 2.52 (s, 3H), 2.07 (s, 3H), 1.99 (s, 3H), 1.95 (s, 3H). <sup>13</sup>C NMR (100 MHz, CDCl<sub>3</sub>) δ 171.2, 146.0, 137.7, 136.6, 134.7, 134.4, 133.5, 131.5, 130.4, 128.9, 128.4, 125.5, 122.7, 108.5, 22.0, 18.2. IR (neat) 1759, 1457, 1278, 1219, 771 cm<sup>-1</sup>. HRMS (ESI-TOF) Calcd for C<sub>18</sub>H<sub>19</sub>NO<sub>2</sub> [M+H]<sup>+</sup> 282.1489, found: 282.1491.

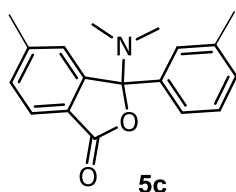

**3-(dimethylamino)-5-methyl-3-(*m*-tolyl)isobenzofuran-1(3*H*)-one (5c).** Following the general procedure, the product was isolated by column chromatography with petroleum ether/EtOAc (4 : 1) as the eluent to give a white solid (70 mg, 50%) (m.p. 143-146 °C). <sup>1</sup>H NMR (400 MHz, CDCl<sub>3</sub>) δ 7.64 (d, *J* = 8.0 Hz, 1H), 7.45 (t, *J* = 8.0, 12 Hz, 2H), 7.22-7.16 (m, 3H), 7.04 (d, *J* = 4.0 Hz, 1H), 2.34 (s, 3H), 2.27 (s, 3H), 2.24 (s, 6H). <sup>13</sup>C NMR (100 MHz, CDCl<sub>3</sub>) δ 169.9, 144.7, 136.3, 135.3, 133.3, 133.0, 132.2, 130.2, 129.0, 127.6, 127.1, 124.2, 121.4, 107.2, 20.7, 16.9. IR (neat) 1759, 1610, 1456, 1284, 1218, 1098, 1056, 929, 859, 773, 707 cm<sup>-1</sup>. HRMS (ESI-TOF) Calcd for C<sub>18</sub>H<sub>20</sub>NO<sub>2</sub> [M+H]<sup>+</sup>: 282.1489, found: 282.1500.

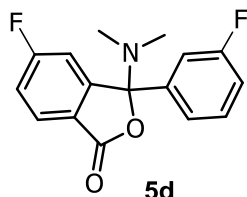

**3-(dimethylamino)-5-fluoro-3-(3-fluorophenyl)isobenzofuran-1(3*H*)-one (5d).** Following the general procedure, the product was isolated by column chromatography with petroleum ether/EtOAc (4 : 1) as the eluent to give a semi-solid (77 mg, 53%). <sup>1</sup>H NMR (400 MHz, CDCl<sub>3</sub>) δ 7.79-7.75 (m, 1H), 7.38 (d, *J* = 8.0 Hz, 1H), 7.32-7.19 (m, 2H), 7.12-7.08 (m, 2H), 6.96-6.92 (m, 1H), 2.24 (s, 6H). <sup>13</sup>C NMR (100 MHz, CDCl<sub>3</sub>) δ 168.4, 168.0, 165.4, 164.3, 161.9, 153.0 (d, *J* = 9.0 Hz), 142.4 (d, *J* = 7.0 Hz), 130.6, 128.1, 121.8, 121.3, 118.2, 118.0, 115.9, 115.7, 113.2, 110.4, 110.1, 105.2, 38.8, 29.6. IR (neat) 1767, 1606, 1483, 1289, 1262, 1218, 864, 772 cm<sup>-1</sup>. <sup>19</sup>F NMR (376 MHz, CDCl<sub>3</sub>) δ 101.7 (d, *J* = 7.5 Hz), -111.3. HRMS (ESI-TOF) Calcd for C<sub>18</sub>H<sub>20</sub>NO<sub>2</sub> [M+H]<sup>+</sup>: 290.0987, found: 290.0998.

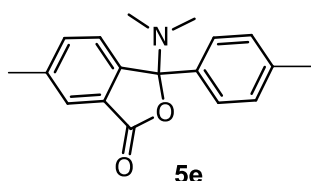

**3-(dimethylamino)-6-methyl-3-(*p*-tolyl)isobenzofuran-1(3*H*)-one (5e).** Following the general procedure, the product was isolated by column chromatography with petroleum ether/EtOAc (4 : 1) as the eluent to give a light brown solid (73 mg, 52%) (m.p. 122-124 °C). <sup>1</sup>H NMR (400 MHz, CDCl<sub>3</sub>) δ 7.62 (d, *J* = 8.0 Hz, 2H), 7.38 (d, *J* = 8.0 Hz, 1H), 7.17 (d, *J* = 8.0 Hz, 4H), 2.86 (s, 3H), 2.80 (s, 3H), 2.35 (s, 3H), 2.33 (s, 3H). <sup>13</sup>C NMR (100 MHz, CDCl<sub>3</sub>) δ 196.1, 170.8, 143.6, 141.9, 138.1, 134.7, 133.9, 130.2, 128.9, 128.8, 127.9, 38.9, 38.7, 34.7, 21.7, 21.4. IR (neat) 1725, 1641, 1606, 1501, 1450, 1398, 1277, 1219, 1179, 1070, 926, 771 cm<sup>-1</sup>. HRMS (ESI-TOF) Calcd for C<sub>18</sub>H<sub>19</sub>NNaO<sub>2</sub> [M+Na]<sup>+</sup>: 304.1308, found: 304.1320.

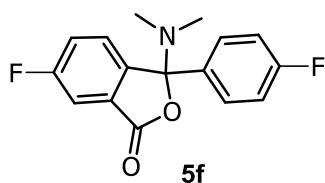

**3-(dimethylamino)-6-fluoro-3-(4-fluorophenyl)isobenzofuran-1(3*H*)-one (5f).**

Following the general procedure, the product was isolated by column chromatography with petroleum ether/EtOAc (4 : 1) as the eluent to give a semi-solid (71 mg, 49%). <sup>1</sup>H NMR (400 MHz, CDCl<sub>3</sub>) δ 7.58-7.54 (t, *J* = 8.0 Hz, 2H), 7.41-7.36 (m, 2H), 7.25-7.20 (m, 1H), 6.98-6.94 (t, *J* = 8.0 Hz, 2H), 2.23 (s, 6H). <sup>13</sup>C NMR (100 MHz, CDCl<sub>3</sub>) δ 168.6 (d, *J* = 3.0 Hz), 164.9, 164.2, 162.4, 161.8, 146.4 (d, *J* = 3.0 Hz), 136.1 (d, *J* = 3.0 Hz), 129.4, 128.2, 124.9, 122.7, 116.6, 110.5, 107.0, 39.0. IR (neat) 1764, 1698, 1507, 1489, 1285, 1227, 1078, 899, 786, 780 cm<sup>-1</sup>. <sup>19</sup>F NMR (376 MHz, CDCl<sub>3</sub>) δ 110.33 (d, *J* = 1060.3 Hz), -112.55 (d, *J* = 11.28 Hz). HRMS (ESI-TOF) Calcd for C<sub>18</sub>H<sub>20</sub>NO<sub>2</sub> [M+H]<sup>+</sup>: 290.0987, found: 290.0990.

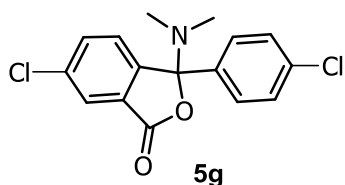

**6-chloro-3-(4-chlorophenyl)-3-(dimethylamino)isobenzofuran-1(3*H*)-one (5g).**

Following the general procedure, the product was isolated by column chromatography with petroleum ether/EtOAc (4 : 1) as the eluent to give a semi-solid (93 mg, 58%). <sup>1</sup>H NMR (400 MHz, CDCl<sub>3</sub>) δ 7.78-7.72 (m, 1H), 7.56-7.47 (m, 3H), 7.42-7.32 (m,

1H), 7.26-7.19 (m, 2H), 2.23 (s, 6H). <sup>13</sup>C NMR (100 MHz, CDCl<sub>3</sub>) δ 169.6, 168.1, 150.3, 148.4, 138.9, 138.4, 136.2, 134.8, 134.5, 129.2, 127.1, 125.5, 124.2, 123.0, 106.6, 38.3. IR (neat) 1763, 1595, 1464, 1281, 1241, 1094, 1066, 870, 829, 771 cm<sup>-1</sup>. HRMS (ESI-TOF) Calcd for C<sub>18</sub>H<sub>19</sub>NNaO<sub>2</sub> [M+Na]<sup>+</sup>: 322.0396, found: 322.0405.

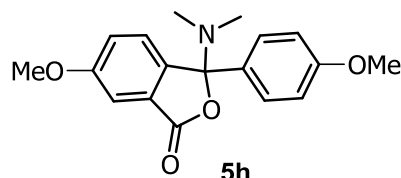

### 3-(dimethylamino)-6-methoxy-3-(4-methoxyphenyl)isobenzofuran-1(3H)-one

(5h). Following the general procedure, the product was isolated by column chromatography with petroleum ether/EtOAc (2 : 1) as the eluent to give a semi-solid (55 mg, 35%). <sup>1</sup>H NMR (400 MHz, CDCl<sub>3</sub>) δ 7.70 (d, *J* = 8.0 Hz, 2H), 7.46 (d, *J* = 12.0 Hz, 1H), 6.86 (t, *J* = 12.0, 4.0 Hz, 1H), 3.80 (d, *J* = 8.0 Hz, 6H), 2.89 (s, 3H), 2.80 (s, 3H). <sup>13</sup>C NMR (100 MHz, CDCl<sub>3</sub>) δ 194.3, 170.6, 163.2, 161.7, 140.3, 132.3, 130.3, 129.0, 113.4, 113.2, 112.8, 55.6, 55.4, 38.8, 34.7. IR (neat) 1636, 1598, 1312, 1283, 1252, 1167, 1064, 1028, 772 cm<sup>-1</sup>. HRMS (ESI-TOF) Calcd for C<sub>18</sub>H<sub>19</sub>NNaO<sub>4</sub> [M+Na]<sup>+</sup>: 336.1206, found: 336.1218.

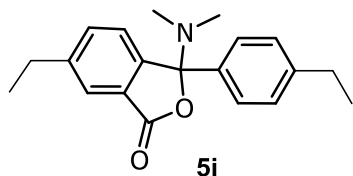

### 3-(dimethylamino)-6-ethyl-3-(4-ethylphenyl)isobenzofuran-1(3H)-one (5i).

Following the general procedure, the product was isolated by column chromatography with petroleum ether/EtOAc (4 : 1) as the eluent to give a light yellow solid (70 mg, 45%) (m.p. 122-124 °C). <sup>1</sup>H NMR (400 MHz, CDCl<sub>3</sub>) δ 7.66 (d, *J* = 8.0 Hz, 2H), 7.42 (d, *J* = 4.0 Hz, 1H), 7.20-7.17 (m, 4H), 2.88 (s, 3H), 2.81 (s, 3H), 2.69-2.61 (m, 4H), 1.23-1.17 (m, 6H). <sup>13</sup>C NMR (100 MHz, CDCl<sub>3</sub>) δ 196.1, 171.0, 149.8, 147.9, 138.2, 134.9, 134.2, 130.3, 127.7, 127.6, 126.7, 38.9, 34.7, 28.9, 28.7, 15.2, 15.0. IR (neat) 1640, 1605, 1501, 1454, 1392, 1277, 1177, 1066, 932, 846, 757 cm<sup>-1</sup>. HRMS (ESI-TOF) Calcd for C<sub>20</sub>H<sub>23</sub>NNaO<sub>2</sub> [M+Na]<sup>+</sup>: 332.1621, found: 332.1625.

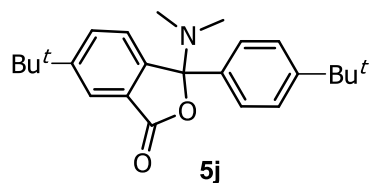

**6-(tert-butyl)-3-(4-tert-butylphenyl)-3-(dimethylamino)isobenzofuran-1(3H)-one (5j).** Following the general procedure, the product was isolated by column chromatography with petroleum ether/EtOAc (3 : 1) as the eluent to give a yellow semi-solid (79 mg, 43%). <sup>1</sup>H NMR (400 MHz, CDCl<sub>3</sub>) δ 7.68 (d, *J* = 8.0 Hz, 2H), 7.41-7.33 (m, 5H), 2.88 (s, 3H), 2.81 (s, 3H), 1.28 (s, 9H), 1.25 (s, 9H). <sup>13</sup>C NMR (100 MHz, CDCl<sub>3</sub>) δ 196.0, 171.3, 156.5, 154.8, 137.9, 134.6, 133.9, 130.1, 125.1, 124.3, 39.0, 38.6, 36.4, 35.1, 34.7, 31.4, 31.1, 31.0, 30.8, 27.8. IR (neat) 1769, 1641, 1604, 1469, 1393, 1277, 1216, 1107, 1068, 931, 848, 771, 689 cm<sup>-1</sup>. HRMS (ESI-TOF) Calcd for C<sub>24</sub>H<sub>32</sub>NO<sub>2</sub> [M+H]<sup>+</sup>: 366.2428, found: 366.2438.

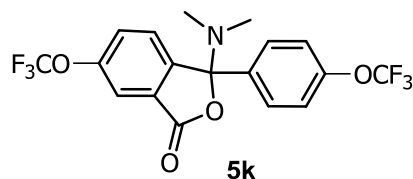

**3-(dimethylamino)-6-(trifluoromethoxy)-3-(4-(trifluoromethoxy)phenyl)isobenzofuran-1(3H)-one (5k).** Following the general procedure, the product was isolated by column chromatography with petroleum ether/EtOAc (3 : 1) as the eluent to give a yellow semi-solid (84 mg, 40%). <sup>1</sup>H NMR (400 MHz, CDCl<sub>3</sub>) δ 7.64 (t, *J* = 8.0, 4.0 Hz, 3H), 7.46 (d, *J* = 8.0 Hz, 1H), 7.39 (d, *J* = 8.0 Hz, 1H), 7.15 (t, *J* = 8.0 Hz, 2H), 2.24 (s, 6H). <sup>13</sup>C NMR (100 MHz, CDCl<sub>3</sub>) δ 167.9, 150.3, 149.5, 148.1, 138.3, 127.8 (d, *J* = 42.0 Hz), 124.5, 121.5 (d, *J* = 24.0 Hz), 117.5, 106.6, 38.8. IR (neat) 1769, 1258, 1218, 1169, 1085, 846, 771 cm<sup>-1</sup>. <sup>19</sup>F NMR (376 MHz, CDCl<sub>3</sub>) δ -57.8, -58.1. HRMS (ESI-TOF) Calcd for C<sub>18</sub>H<sub>14</sub>F<sub>6</sub>NO<sub>4</sub> [M+H]<sup>+</sup>: 422.0822, found: 422.0831.

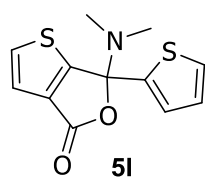

**6-(dimethylamino)-6-(thiophen-2-yl)thieno[2,3-*o*]furan-4(6H)-one (5l).** Following the general procedure, the product was isolated by column chromatography with

petroleum ether/EtOAc (4 : 1) as the eluent to give a brown semi-solid (27 mg, 20%).  $^1\text{H}$  NMR (400 MHz,  $\text{CDCl}_3$ )  $\delta$  7.85 (d,  $J = 4.0$  Hz, 1H), 7.64 (d,  $J = 4.0$  Hz, 1H), 7.58(d,  $J = 4.0$  Hz, 1H), 7.12-7.09 (m, 2H), 2.97 (s, 3H), 2.78 (s, 3H).  $^{13}\text{C}$  NMR (100 MHz,  $\text{CDCl}_3$ )  $\delta$  184.5, 171.9, 146.1, 143.5, 141.4, 136.2, 134.8 (d,  $J = 20.0$  Hz), 133.9, 131.2, 128.7, 128.6, 128.5, 36.7, 35.1, 26.4. IR (neat) 1714, 1624, 1528, 1412, 1354, 1278, 1114, 1055, 974, 858, 798  $\text{cm}^{-1}$ . HRMS (ESI-TOF) Calcd for  $\text{C}_{12}\text{H}_{11}\text{NNaO}_2\text{S}_2$   $[\text{M}+\text{Na}]^+$ : 288.0123, found: 288.0130.

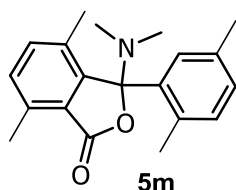

**3-(dimethylamino)-3-(2,5-dimethylphenyl)-4,7-dimethylisobenzofuran-1(3H)-on (5m).** Following the general procedure, the product was isolated by column chromatography with petroleum ether/EtOAc (4 : 1) as the eluent to give a pale yellow semi-solid (56 mg, 36%).  $^1\text{H}$  NMR (400 MHz,  $\text{CDCl}_3$ )  $\delta$  7.19 (s, 1H), 7.15-7.09 (m, 2H), 7.06 (d,  $J = 8.0$  Hz, 1H), 7.03 (d,  $J = 8.0$  Hz, 1H), 2.82 (s, 3H), 2.75 (s, 3H), 2.42 (s, 3H), 2.18 (s, 6H), 1.98 (s, 3H).  $^{13}\text{C}$  NMR (100 MHz,  $\text{CDCl}_3$ )  $\delta$  170.0, 138.8, 137.5, 136.0, 135.5, 135.1, 132.7, 131.5, 131.2, 131.0, 130.5, 38.0, 34.1, 29.7, 20.8, 20.5, 19.5, 18.5. IR (neat) 1635, 1219, 812, 771  $\text{cm}^{-1}$ . HRMS (ESI-TOF) Calcd for  $\text{C}_{20}\text{H}_{23}\text{NNaO}_2$   $[\text{M}+\text{Na}]^+$ : 332.1621, found: 332.1627.

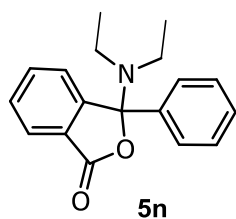

**3-(dimethylamino)-3-phenylisobenzofuran-1(3H)-on (5n).** Following the general procedure, the product was isolated by column chromatography with petroleum ether/EtOAc (4 : 1) as the eluent to give a pale yellow semi-solid (49 mg, 35%).  $^1\text{H}$  NMR (400 MHz,  $\text{CDCl}_3$ )  $\delta$  7.73 (d,  $J = 8.0$  Hz, 2H), 7.48-7.43 (m, 3H), 7.38-7.31 (m, 4H), 3.38-3.33 (m, 2H), 3.21-3.16 (m, 2H), 1.06-0.97 (m, 6H).  $^{13}\text{C}$  NMR (100 MHz,  $\text{CDCl}_3$ )  $\delta$  196.6, 169.9, 138.2, 137.1, 136.8, 133.0, 130.8, 130.2, 129.8, 128.2, 128.1,



126.7, 43.2, 38.8, 13.7, 12.1. IR (neat) 1663, 1628, 1437, 1283, 1219, 1079, 933, 771, 702  $\text{cm}^{-1}$ . HRMS (ESI-TOF) Calcd for  $\text{C}_{18}\text{H}_{20}\text{NO}_2$   $[\text{M}+\text{H}]^+$ : 282.1489, found: 282.1498.

## 2.5 Gram-scale synthesis of **5a**

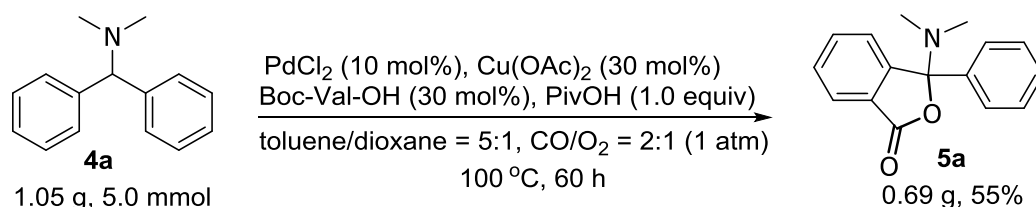

In an oven-dried Schlenk tube equipped with a stir-bar, **4a** (1.05 g, 5 mmol, 1.0 equiv),  $\text{PdCl}_2$  (10 mol %),  $\text{Cu}(\text{OAc})_2$  (30 mol %), Boc-Val-OH (30 mol %), PivOH (1.0 equiv) were combined. A balloon filled  $V(\text{CO})/V(\text{O}_2) = 2:1$  (1 atm) was connected to the Schlenk tube via the side tube and purged for 3 times. Then toluene/dioxane = 5:1 (18 mL) were added to the tube via a syringe. The Schlenk tube was heated at  $100\text{ }^\circ\text{C}$  for 60 h, then cooled to room temperature. The reaction was quenched by aq. brine and extracted with EtOAc. The combined organic layer were washed with brine and dried over anhydrous  $\text{Na}_2\text{SO}_4$ , filtered and concentrated under reduce pressure. The residue was purified by column chromatography on silica gel to afford **5a** (0.69 g, 55%).

## 2.6 General procedure for the preparation of **6a**

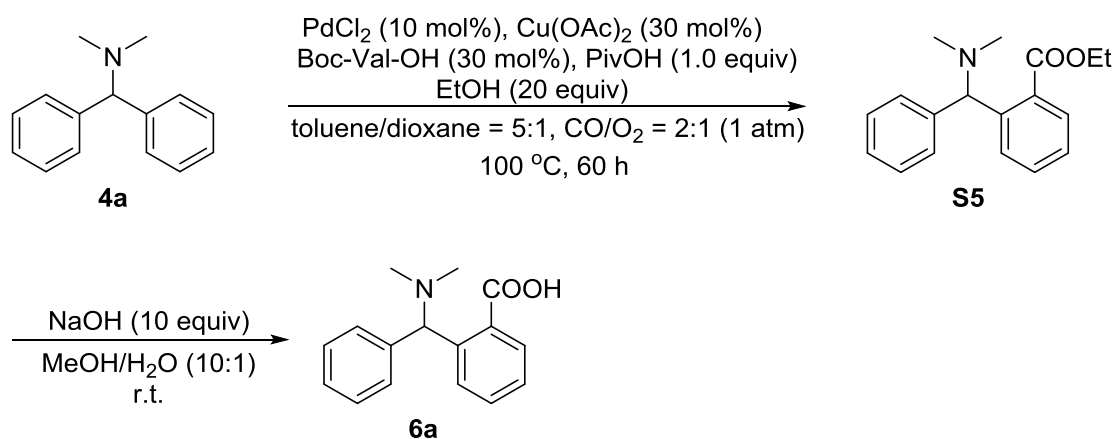

In an oven-dried Schlenk tube equipped with a stir-bar, Amide **4a** (2.0 mmol, 1.0 equiv),  $\text{PdCl}_2$  (10 mol %),  $\text{Cu}(\text{OAc})_2$  (30 mol %), Boc-Val-OH (30 mol %), PivOH (1.0 equiv) were combined. A balloon filled  $V(\text{CO})/V(\text{O}_2) = 2:1$  (1 atm) was

connected to the Schlenk tube via the side tube and purged for 3 times. Then toluene/dioxane = 5:1 (6.0 mL) and EtOH (20 equiv) were added to the tube via a syringe. The Schlenk tube was heated at 100 °C for 60 h, then cooled to room temperature. The reaction was quenched by aq. brine and extracted with EtOAc. The combined organic layer were washed with brine and dried over anhydrous Na<sub>2</sub>SO<sub>4</sub>, filtered and concentrated under reduce pressure to afford **S5**, which could be used directly in the next step without further purification.

To a mixture of crude **S5** in MeOH/H<sub>2</sub>O (10:1, 20 mL) was added NaOH (10 equiv). The reaction mixture was stirred at room temperature until completion of **S5** determined by GC-MS. The solvent was concentrated under reduce pressure, and diluted with H<sub>2</sub>O, washed with EtOAc, the aqueous phase was acidified to PH 5-6 by aq. HCl (1N). The aqueous suspension was extracted with EtOAc and the combined organic layer was washed with brine and dried over anhydrous Na<sub>2</sub>SO<sub>4</sub>, filtered and concentrated under reduce pressure to afford **6a**, which could be used directly in the next step without further purification.

**2-((dimethylamino)(phenyl)methyl)benzoic acid (6a)**. <sup>1</sup>H NMR (400 MHz, CDCl<sub>3</sub>) δ 8.19 (d, *J* = 4.0 Hz, 1H), 7.55 (d, *J* = 8.0 Hz, 2H), 7.46 (t, *J* = 8.0, 4.0 Hz, 1H), 7.32-7.26 (m, 5H), 5.32 (s, 1H), 2.54 (s, 6H). MS (ESI) Calcd for C<sub>18</sub>H<sub>20</sub>NO<sub>2</sub> [M+H]<sup>+</sup>: 256, found: 256.

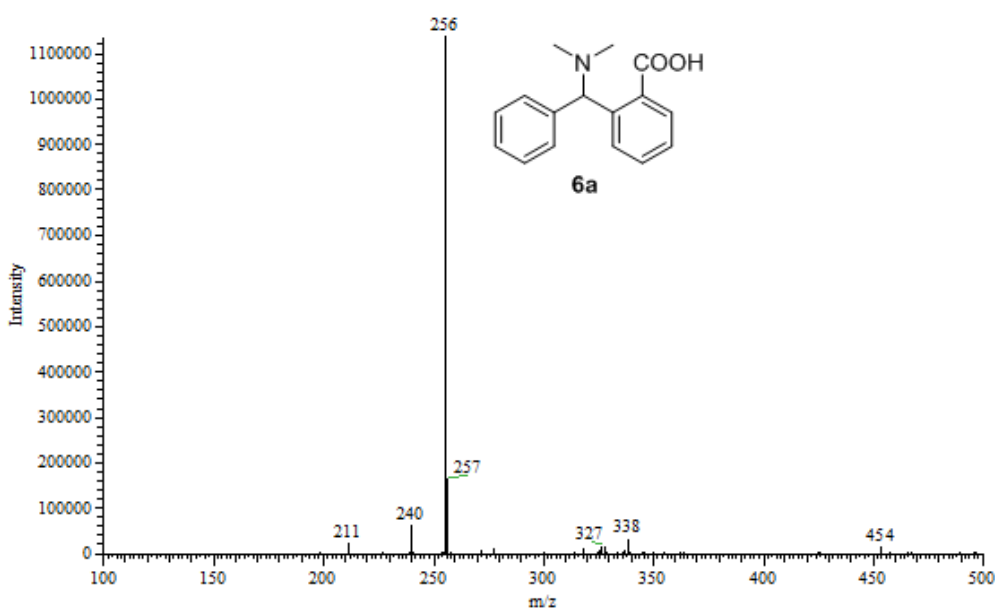

**Figure S2**



**Note:** The value of  $K_H/K_D$  was calculated from the  $^1\text{H}$  NMR spectra above which should be the mixture of compound **3a** and **3a-d<sub>3</sub>**. As a result,  $K_H/K_D = 1.68/(3-1.68) = 1.3$

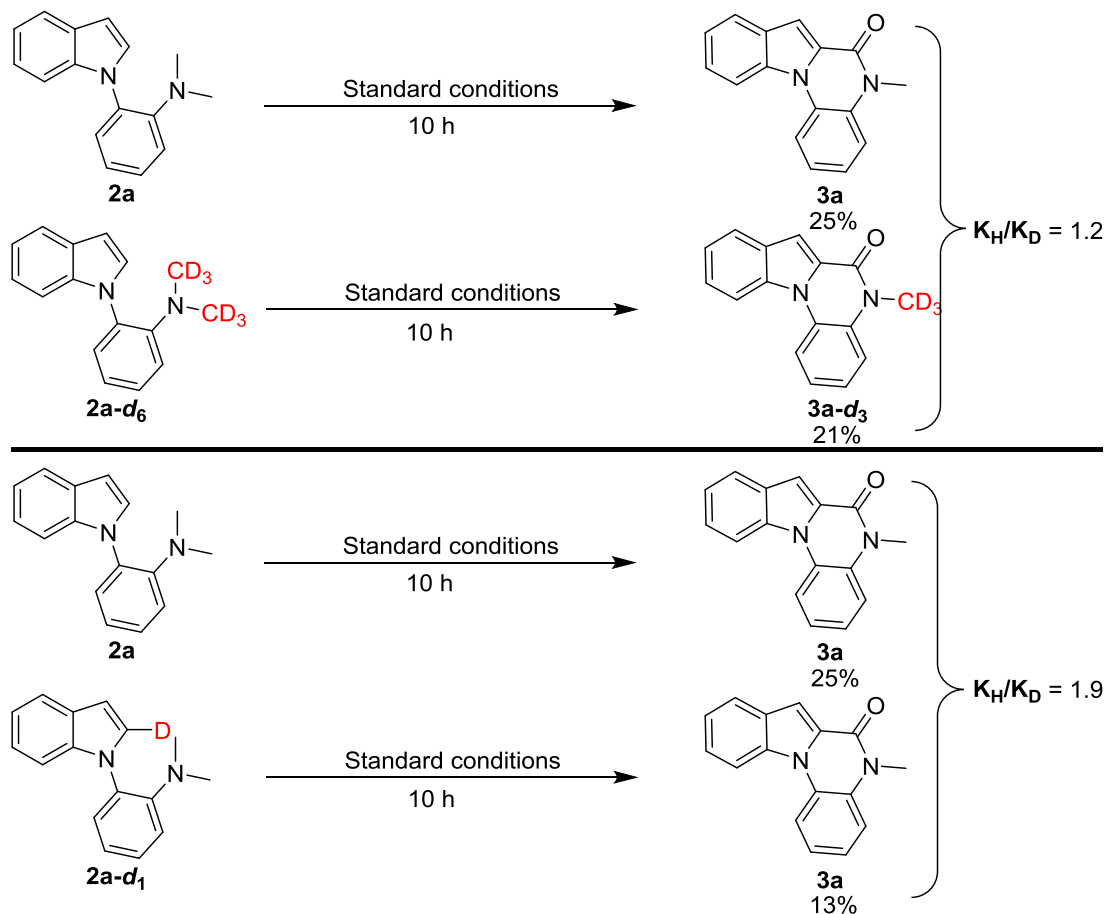

**Note:** The value of  $K_H/K_D$  was calculated from GC-MS yield.

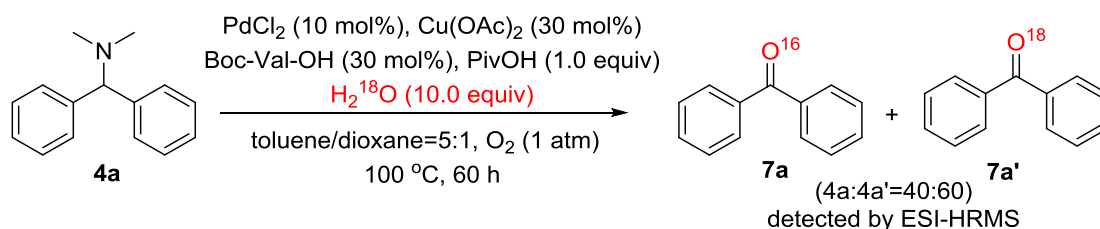

In an oven-dried Schlenk tube equipped with a stir-bar, **4a** (0.2 mmol, 1.0 equiv),  $\text{PdCl}_2$  (10 mol %),  $\text{Cu}(\text{OAc})_2$  (30 mol %),  $\text{Boc-Val-OH}$  (30 mol %),  $\text{PivOH}$  (1.0 equiv),  $\text{H}_2^{18}\text{O}$  (10.0 equiv) were combined. A balloon filled with  $\text{O}_2$  (1 atm) was connected to the Schlenk tube via the side tube and purged for 3 times. Then toluene/dioxane = 5:1 (3.0 mL) were added to the tube via a syringe. The Schlenk

tube was heated at 100 °C for 60 h, then cooled to room temperature. The reaction was quenched by aq. brine and extracted with EtOAc. The combined organic layer were washed with brine and dried over anhydrous Na<sub>2</sub>SO<sub>4</sub>, filtered and concentrated under reduce pressure. The residue was purified by column chromatography on silica gel to afford **7a(7a')**. The HRMS reveals the presence of <sup>18</sup>O incorporated product **7a** along with **7a'** as shown below.

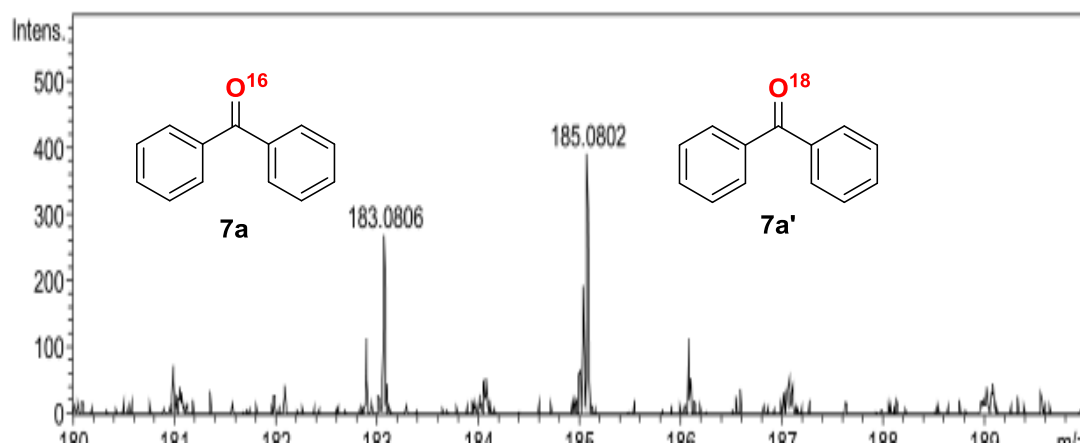

**Figure S3**

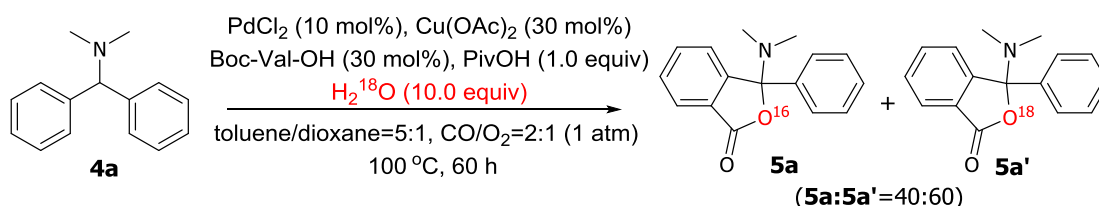

In an oven-dried Schlenk tube equipped with a stir-bar, **4a** (0.2 mmol, 1.0 equiv), PdCl<sub>2</sub> (10 mol %), Cu(OAc)<sub>2</sub> (30 mol %), Boc-Val-OH (30 mol %), PivOH (1.0 equiv), H<sub>2</sub><sup>18</sup>O (10.0 equiv) were combined. A balloon filled V(CO)/V(O<sub>2</sub>) = 2:1 (1 atm) was connected to the Schlenk tube via the side tube and purged for 3 times. Then toluene/dioxane = 5:1 (3.0 mL) were added to the tube via a syringe. The Schlenk tube was heated at 100 °C for 60 h, then cooled to room temperature. The reaction was quenched by aq. brine and extracted with EtOAc. The combined organic layer were washed with brine and dried over anhydrous Na<sub>2</sub>SO<sub>4</sub>, filtered and concentrated under reduce pressure. The residue was purified by column chromatography on silica gel to afford **5a(5a')**. The HRMS reveals the presence of <sup>18</sup>O incorporated product **5a** along with **5a'** as shown below.

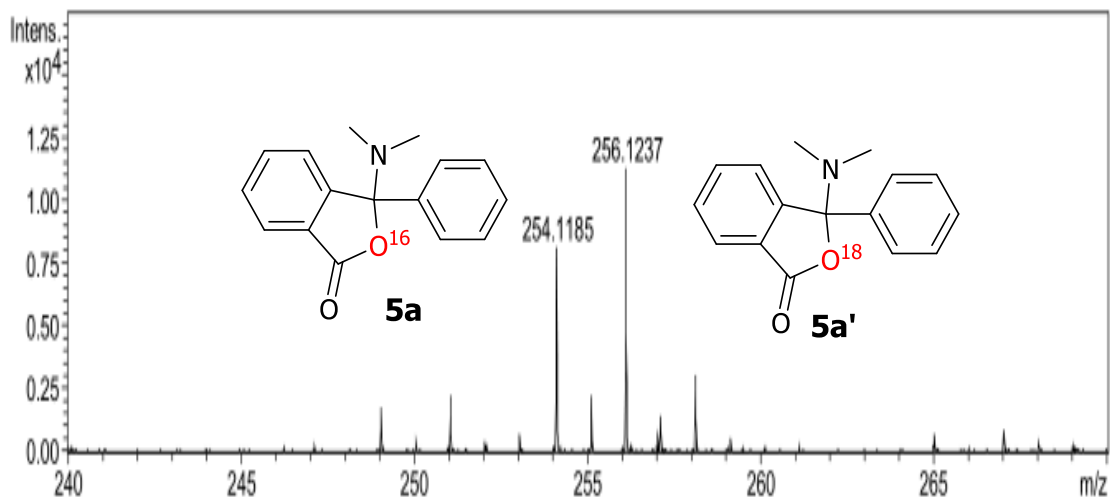

**Figure S4**

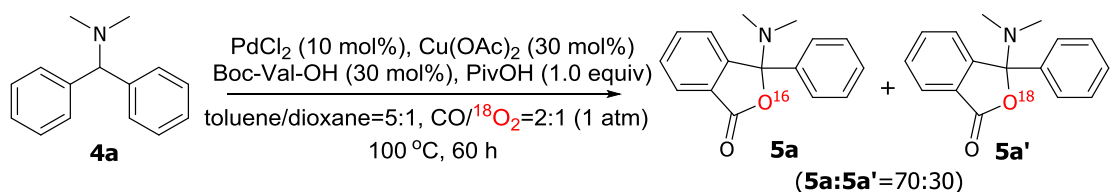

In an oven-dried Schlenk tube equipped with a stir-bar, **4a** (0.5 mmol, 1.0 equiv), PdCl<sub>2</sub> (10 mol %), Cu(OAc)<sub>2</sub> (30 mol %), Boc-Val-OH (30 mol %), PivOH (1.0 equiv) were combined. A balloon filled V(CO)/V(<sup>18</sup>O<sub>2</sub>) = 2:1 (1 atm) was connected to the Schlenk tube via the side tube and purged for 3 times. Then toluene/dioxane = 5:1, (3.0 mL) were added to the tube via a syringe. The Schlenk tube was heated at 100 °C for 60 h, then cooled to room temperature. The reaction was quenched by aq. brine and extracted with EA. The combined organic layer were washed with brine and dried over anhydrous Na<sub>2</sub>SO<sub>4</sub>, filtered and concentrated under reduce pressure. The residue was purified by column chromatography on silica gel to afford **5a(5a')**. The HRMS reveals the presence of <sup>18</sup>O incorporated product **5a** along with **5a'** as shown below.

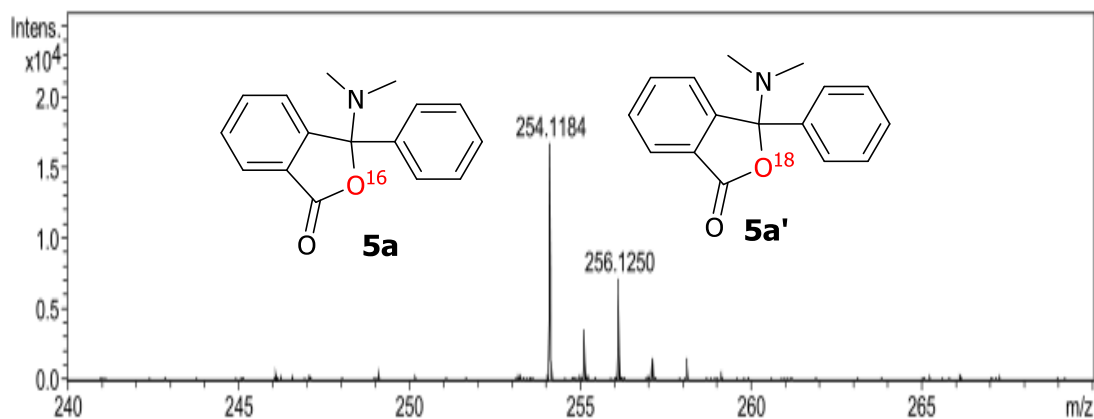

Figure S5

### 3.2 KIE Experiments

#### Preparation of deuterated 4a

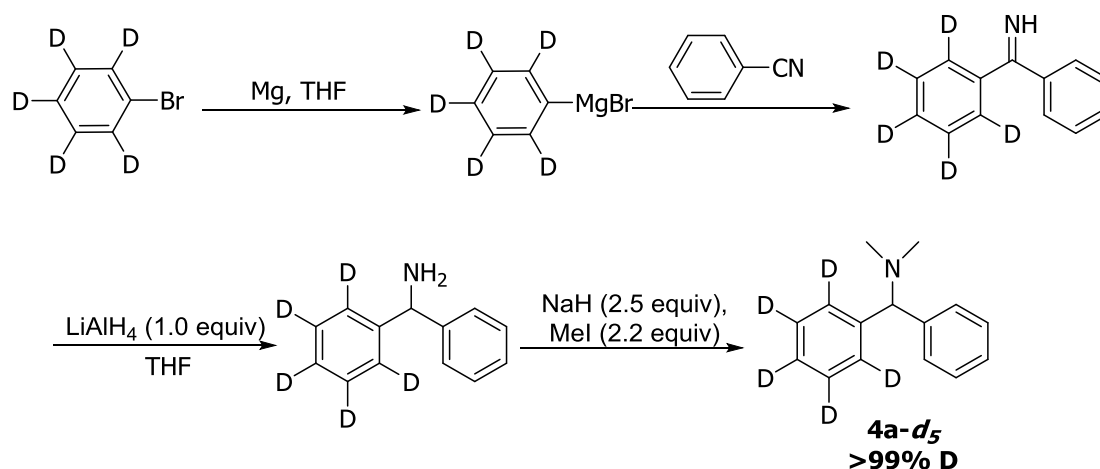

#### *N,N*-Dimethyl-1-phenyl-1-(phenyl-*d*<sub>5</sub>)methanamine (**4a-d<sub>5</sub>**)

Following the general procedure, **4a-d<sub>5</sub>** was obtained in 45% yield as a pale yellow solid (petroleum ether : ethyl acetate = 20 : 1), TLC  $R_f = 0.5$  (PE/EA = 20/1).  $^1\text{H}$  NMR (400 MHz,  $\text{CDCl}_3$ )  $\delta$  7.38-7.34 (m, 2H), 7.21-7.17 (m, 2H), 7.11-7.09 (m, 1H), 4.01 (d,  $J = 8.0$  Hz, 1H), 2.14 (t,  $J = 4.0$  Hz, 6H). HRMS (ESI-TOF) Calcd for  $\text{C}_{15}\text{H}_{12}\text{D}_5\text{N}$   $[\text{M}+\text{H}]^+$ : 217.1676, found: 217.1749.

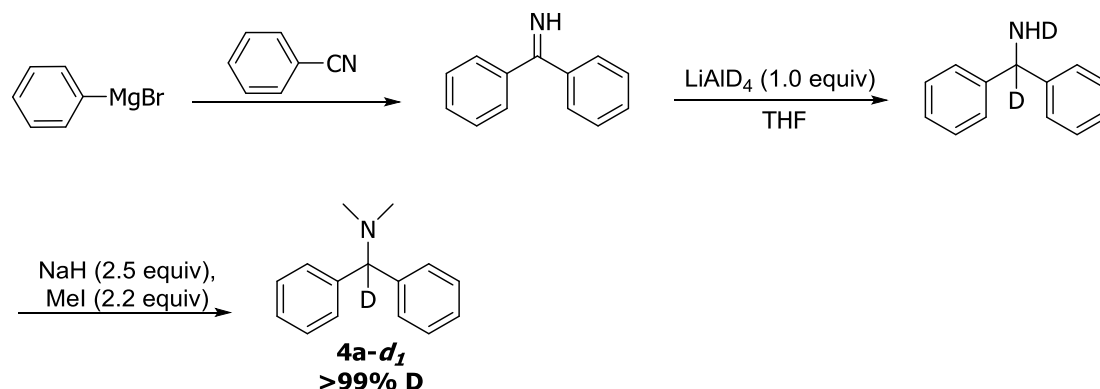

#### *N,N*-Dimethyl-1,1-diphenylmethanamine-*d* (**4a-d<sub>1</sub>**)

Following the general procedure, **4a-d<sub>5</sub>** was obtained in 55% yield as a pale yellow solid (petroleum ether : ethyl acetate = 20 : 1), TLC  $R_f = 0.5$  (PE/EA = 20/1).  $^1\text{H}$  NMR (400 MHz,  $\text{CDCl}_3$ )  $\delta$  7.37-7.21 (m, 4H), 7.19-7.17 (m, 4H), 7.11-7.07 (m, 2H), 2.13 (s, 6H). HRMS (ESI-TOF) Calcd for  $\text{C}_{15}\text{H}_{16}\text{DN}$   $[\text{M}+\text{H}]^+$ : 213.1424, found: 213.1497.

#### Intramolecular KIE experiment

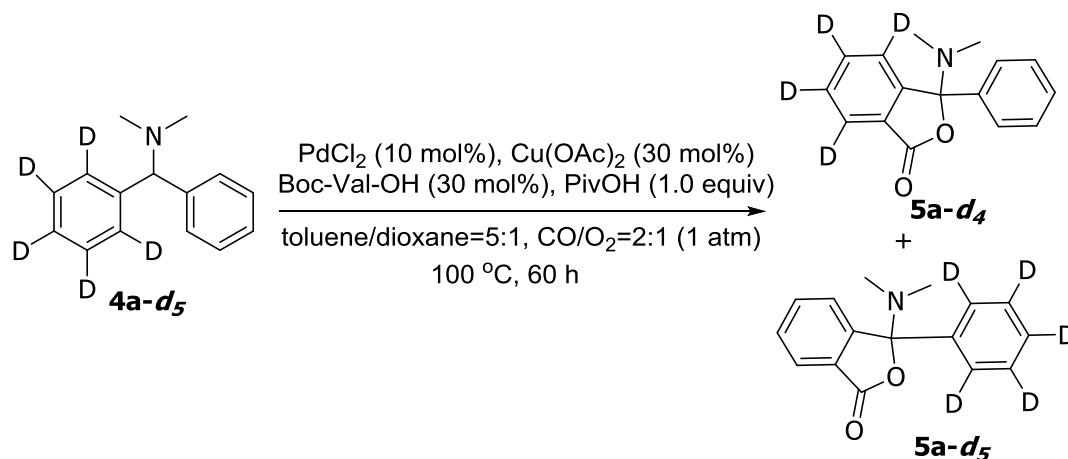

The intramolecular KIE experiment was first conducted. Following the general procedure D. **4a-d<sub>5</sub>** (1.0 mmol, 1.0 equiv),  $\text{PdCl}_2$  (10 mol %),  $\text{Cu(OAc)}_2$  (30 mol %),  $\text{Boc-Val-OH}$  (30 mol %),  $\text{PivOH}$  (1.0 equiv) were combined. A balloon filled  $V(\text{CO})/V(\text{O}_2) = 2:1$  (1 atm) was connected to the Schlenk tube via the side tube and purged for 3 times. Then toluene/dioxane = 5:1 (6.0 mL) were added to the tube via a syringe. The Schlenk tube was heated at 100 °C for 60 h. The **5a-d<sub>5</sub>**(**5a-d<sub>4</sub>**) was obtained and analyzed by  $^1\text{H}$  NMR to reveal the ratio of **5a-d<sub>5</sub>** and **5a-d<sub>4</sub>** to be 4:1 (KIE) (Figure S6).

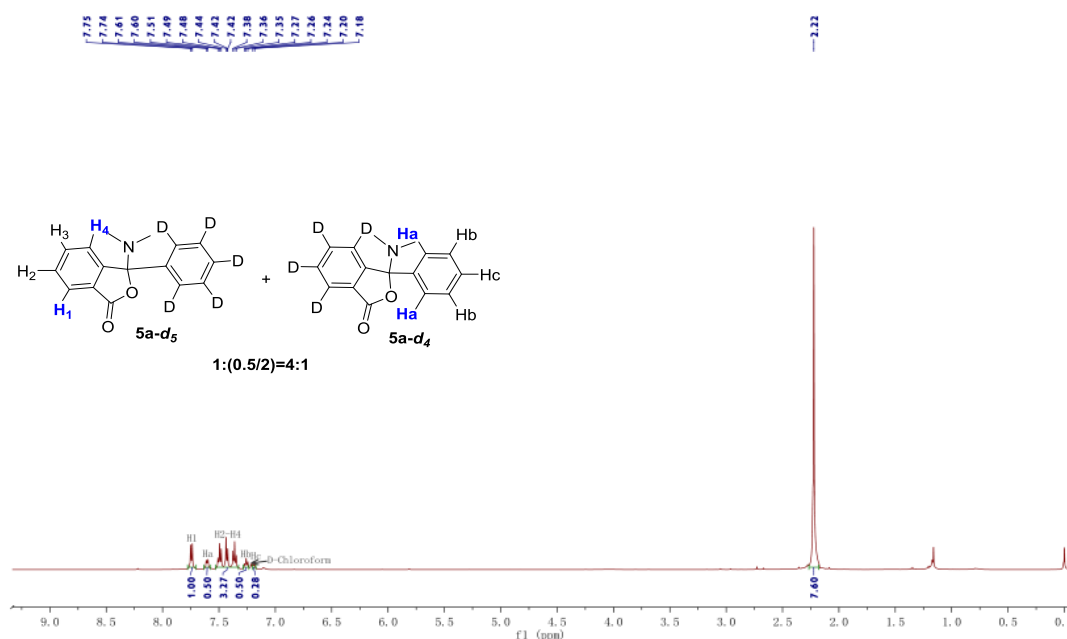

Figure S6

KIE for two parallel reactions



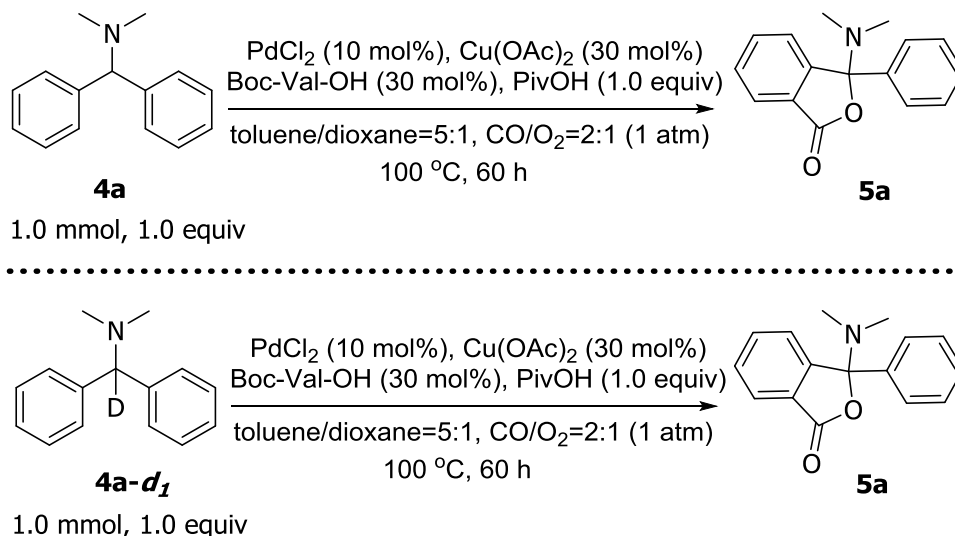

Furthermore, two parallel reactions of **4a** and **4a-d<sub>1</sub>** respectively were performed to determine the corresponding **KIE** value. Following the general procedure, **4a/4a-d<sub>1</sub>** (1.0 mmol, 1.0 equiv), PdCl<sub>2</sub> (10 mol %), Cu(OAc)<sub>2</sub> (30 mol %), Boc-Val-OH (30 mol %), PivOH (1.0 equiv) were combined. A balloon filled V(CO)/V(O<sub>2</sub>) = 2:1 (1 atm) was connected to the Schlenk tube via the side tube and purged for 3 times. Then toluene/dioxane = 5:1 (6.0 mL) were added to the tube via a syringe. The Schlenk tube was heated at 100 °C. Each reaction was sampled at the following indicated points and analyzed by GC-MS. The GC-MS yields were calculated after calibrating the response of GC-MS.

**Table S10 KIE-H**

| <b>SM</b> | Time (h)        | 1  | 2  | 3  | 5  | 7  | 9  | 11 | 13 | 15 | 17 |
|-----------|-----------------|----|----|----|----|----|----|----|----|----|----|
| <b>4a</b> | Yield of 3a (%) | <5 | <5 | <5 | 13 | 18 | 21 | 25 | 29 | 32 | 35 |

**Table S11 KIE-D**

| <b>SM</b>               | Time (h)        | 1  | 2  | 3  | 5  | 7  | 9  | 11 | 13 | 15 | 17 |
|-------------------------|-----------------|----|----|----|----|----|----|----|----|----|----|
| <b>4a-d<sub>1</sub></b> | Yield of 3a (%) | <5 | <5 | <5 | 10 | 11 | 15 | 17 | 21 | 23 | 27 |

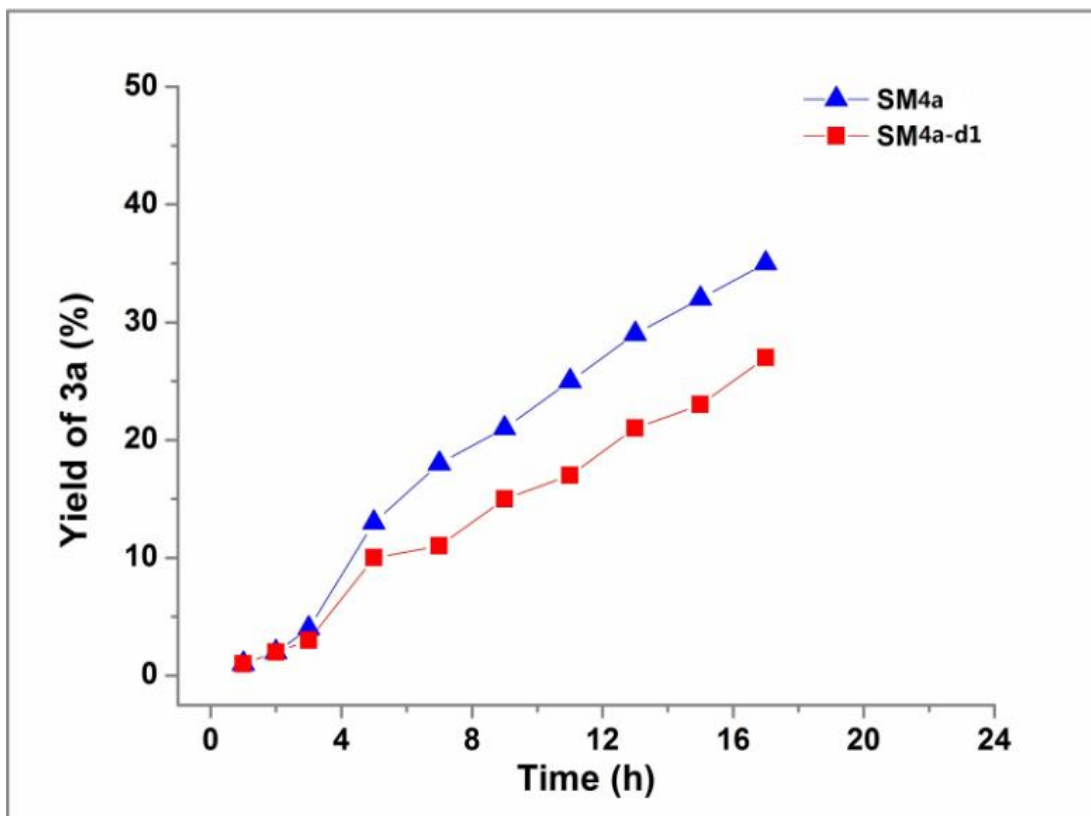

Figure S7

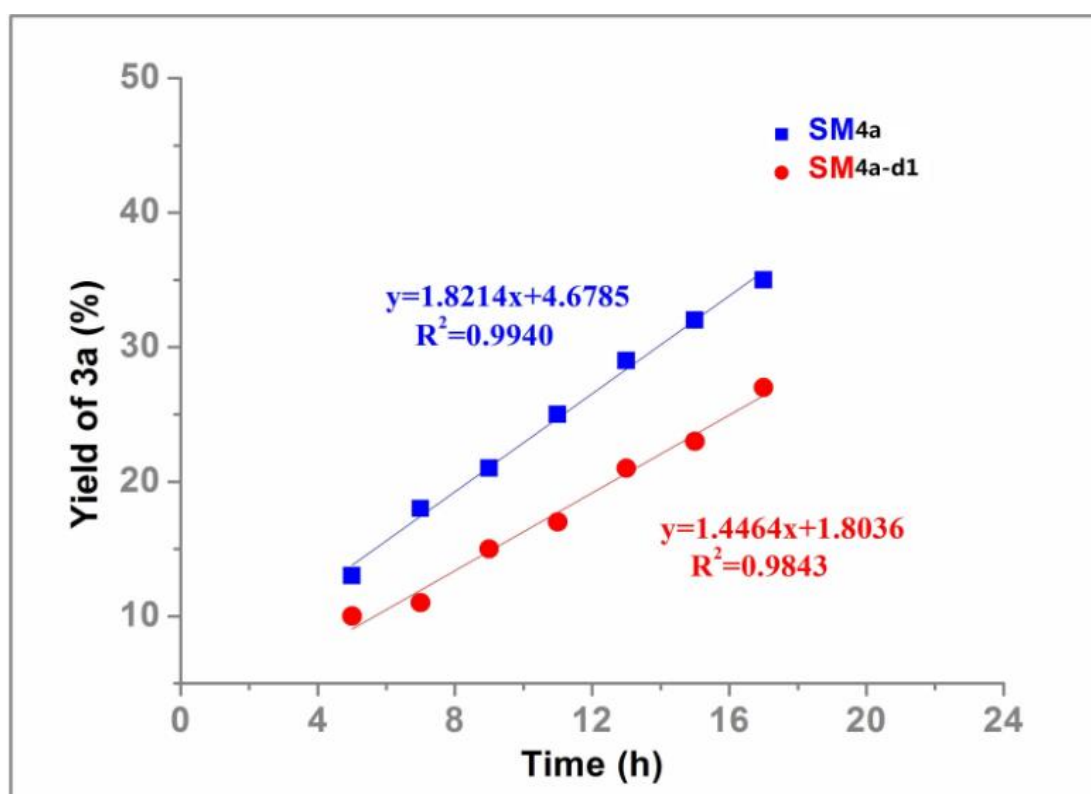

$KIE = 1.8214/1.14464 = 1.3$

Figure S8

### 3.3 Computational studies

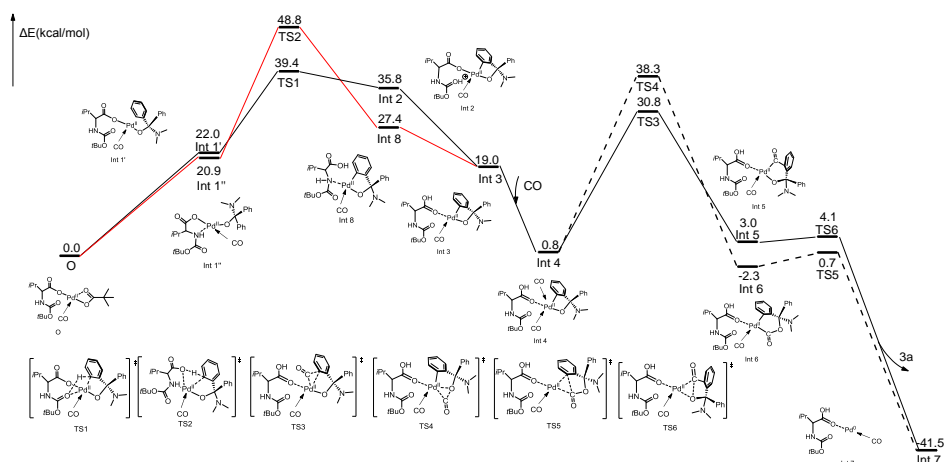

**Figure S9. Zero-point energy profiles for migratory insertion with two molecules CO**

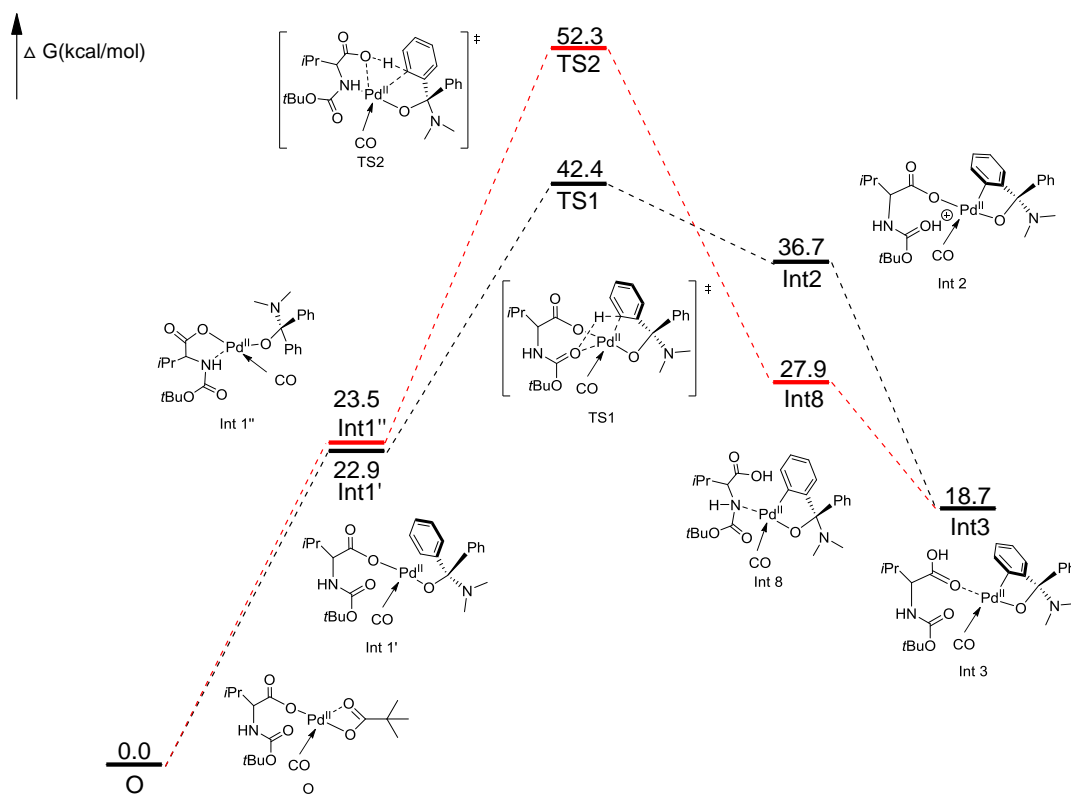

**Figure S10. The free energy profile [kcal/mol] for C(sp<sup>2</sup>)-H activation of Pd(II) complex**

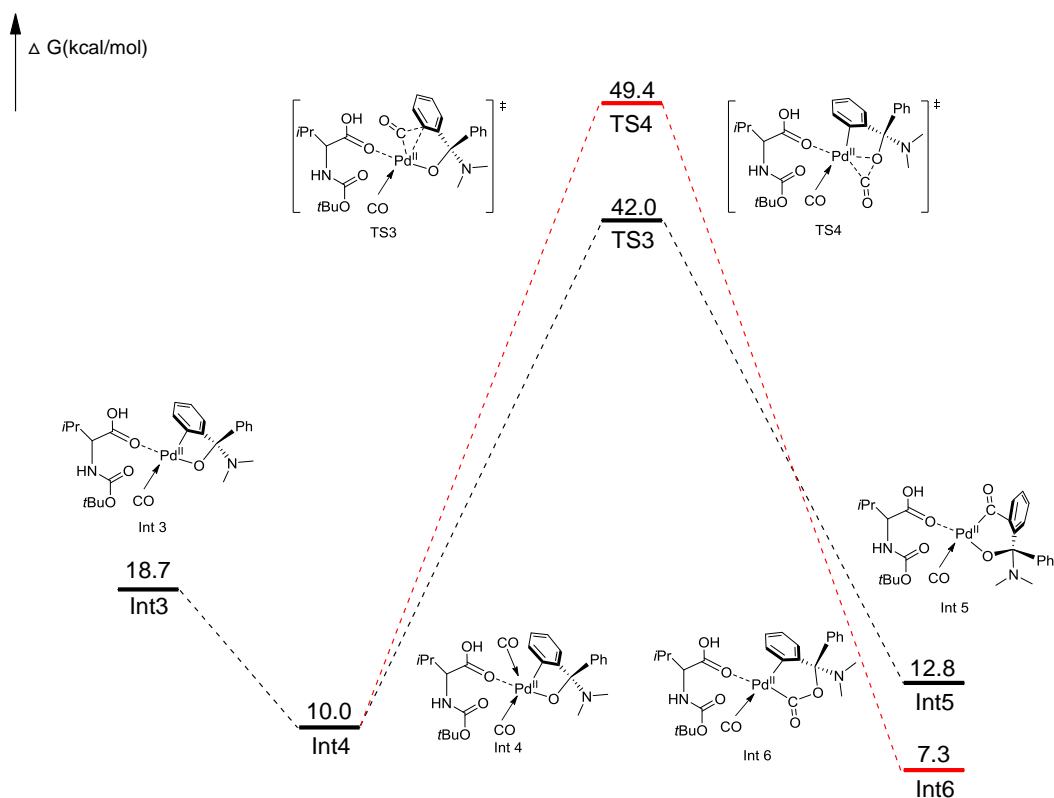

Figure S11. The free energy profile [kcal/mol] for Migratory insertion step

Table S12.

| geometry | $\Delta E^{[d]}$ | $\Delta H^{[d]}$ | $\Delta S^{[e]}$ | $\Delta G^{[d]}$ |
|----------|------------------|------------------|------------------|------------------|
| CO       |                  |                  |                  |                  |
| 3a       |                  |                  |                  |                  |
| PIOH     |                  |                  |                  |                  |
| A        |                  |                  |                  |                  |
| O        | 0.0              | 0.0              | 0.0              | 0.0              |
| Int 1'   | 22.0             | 22.2             | -2.3             | 22.9             |
| Int 1''  | 20.9             | 20.6             | -9.7             | 23.5             |
| Int 2    | 35.8             | 35.9             | -2.7             | 36.7             |
| Int 3    | 19.0             | 19.4             | 2.3              | 18.7             |
| Int 3'   | 6.2              | 6.1              | -10.1            | 9.1              |
| Int 4    | 0.8              | 1.0              | -30.2            | 10.0             |
| Int 5    | 3.0              | 2.8              | -33.5            | 12.8             |
| Int 6    | -2.3             | -2.5             | -32.9            | 7.3              |
| Int 7    | -41.5            | -42.7            | 5.4              | -44.3            |
| Int 8    | 27.4             | 27.6             | -1.0             | 27.9             |
| TS1      | 39.4             | 39               | -11.4            | 42.4             |
| TS2      | 48.8             | 48.4             | -13.1            | 52.3             |
| TS3      | 30.8             | 30.4             | -38.9            | 42.0             |
| TS4      | 38.3             | 38               | -38.2            | 49.4             |
| TS5      | 0.7              | 0.1              | -35.2            | 10.6             |
| TS6      | 4.1              | 3.5              | -38.2            | 14.9             |

[a] Basis set (BS) refers to the standard 6-31G(d,p) basis for C, H, O, N atoms and LANL2DZ valence basis set in combination with the corresponding effective core potential for Pd. [b] Relative activation energy and reaction parameters were calculated based on those of free O. [c] Parameters for all the transition state (TSs) should read as those with double dagger like  $\Delta E^\ddagger$ ,  $\Delta H^\ddagger$ ,  $\Delta S^\ddagger$ , and  $\Delta G^\ddagger$ . [d] In kcal/mol. [e] In kcal/(mol K).

### B3-LYP geometries for all the optimized compounds and transition states.

#### CO

|   |            |            |             |
|---|------------|------------|-------------|
| O | 0.00000000 | 0.00000000 | 0.48768500  |
| C | 0.00000000 | 0.00000000 | -0.65024600 |

#### PiVOH

|   |             |             |             |
|---|-------------|-------------|-------------|
| C | -0.57318700 | -0.01018000 | -0.00000200 |
| C | -0.97253300 | -0.80515100 | -1.26353200 |
| H | -0.68907500 | -0.26895100 | -2.17524400 |
| H | -0.49631300 | -1.78836500 | -1.28175200 |
| H | -2.05819100 | -0.94624400 | -1.28131000 |
| C | -1.25095200 | 1.36799500  | -0.00010600 |
| H | -2.33894800 | 1.24669800  | -0.00011000 |
| H | -0.96691100 | 1.94861900  | 0.88142900  |
| H | -0.96688600 | 1.94849500  | -0.88171200 |
| C | -0.97256000 | -0.80495900 | 1.26363500  |
| H | -0.49636100 | -1.78818100 | 1.28200900  |
| H | -0.68911300 | -0.26863200 | 2.17527800  |
| H | -2.05822100 | -0.94603300 | 1.28141900  |
| C | 0.94406900  | 0.18603000  | 0.00000100  |
| O | 1.52732200  | 1.24831200  | -0.00000700 |
| O | 1.61654700  | -0.99556300 | 0.00000900  |
| H | 2.56005100  | -0.76180700 | 0.00000600  |

#### 3a

|   |             |             |             |
|---|-------------|-------------|-------------|
| C | 3.19751500  | -2.03036100 | -0.51122800 |
| C | 2.26688300  | -2.02704400 | -1.56138500 |
| C | 1.15210300  | -1.18403400 | -1.54252800 |
| C | 0.99284000  | -0.33779000 | -0.44876900 |
| C | 1.91777100  | -0.34411800 | 0.58709400  |
| C | 3.03057800  | -1.18233000 | 0.58252900  |
| H | 4.05083500  | -2.70011400 | -0.55445100 |
| H | 2.41476200  | -2.69488100 | -2.40505700 |
| H | 0.43568000  | -1.19328700 | -2.35710500 |
| H | 3.73399000  | -1.16336500 | 1.40874100  |
| C | -0.11351600 | 0.66589400  | -0.12906200 |
| C | -1.44530000 | -0.06317400 | 0.08759600  |

|          |             |             |             |
|----------|-------------|-------------|-------------|
| C        | -1.86951400 | -0.44854700 | 1.36306000  |
| C        | -2.22165000 | -0.41612500 | -1.02529700 |
| C        | -3.05041400 | -1.17620800 | 1.52172400  |
| H        | -1.28518400 | -0.16696100 | 2.23082500  |
| C        | -3.40043400 | -1.14236700 | -0.86349600 |
| H        | -1.90487100 | -0.09783600 | -2.01303500 |
| C        | -3.81799100 | -1.52789400 | 0.41178900  |
| H        | -3.37051400 | -1.46427200 | 2.51879900  |
| H        | -3.99441600 | -1.40385700 | -1.73454900 |
| H        | -4.73641100 | -2.09346300 | 0.53861700  |
| N        | -0.23484200 | 1.71000400  | -1.11305900 |
| C        | 1.02573000  | 2.33338100  | -1.52534000 |
| H        | 1.72903300  | 1.58133000  | -1.88481000 |
| H        | 0.81563800  | 3.02108800  | -2.34934100 |
| H        | 1.50498500  | 2.90722800  | -0.71665900 |
| C        | -1.22388000 | 2.74085800  | -0.77089100 |
| H        | -2.17140700 | 2.28056200  | -0.49042900 |
| H        | -0.89016700 | 3.38450900  | 0.05634700  |
| H        | -1.39416600 | 3.36732500  | -1.65151000 |
| O        | 0.33401700  | 1.21837200  | 1.17564800  |
| C        | 1.50580200  | 0.65030900  | 1.60371700  |
| O        | 2.04435300  | 0.95703700  | 2.63909700  |
| <b>A</b> |             |             |             |
| C        | 3.47658000  | -1.76075600 | -0.28638800 |
| C        | 2.95593000  | -0.99144400 | -1.32859400 |
| C        | 1.85183800  | -0.16750900 | -1.11265000 |
| C        | 1.25326500  | -0.09180100 | 0.15278700  |
| C        | 1.77666800  | -0.87436600 | 1.18989000  |
| C        | 2.88100000  | -1.69992800 | 0.97317800  |
| H        | 4.33603900  | -2.40271400 | -0.45602000 |
| H        | 3.41117700  | -1.03067700 | -2.31425100 |
| H        | 1.45389300  | 0.43602600  | -1.92110700 |
| H        | 1.30611300  | -0.84267400 | 2.16675700  |
| H        | 3.27215800  | -2.29865100 | 1.79089700  |
| C        | -0.00630700 | 0.76520000  | 0.40256500  |
| C        | -1.23841700 | -0.11381100 | 0.12171200  |
| C        | -1.55136900 | -0.48067500 | -1.19449600 |
| C        | -2.03438500 | -0.59659400 | 1.16474500  |
| C        | -2.64100400 | -1.30679300 | -1.46151000 |
| H        | -0.94324900 | -0.10571800 | -2.01061500 |
| C        | -3.12465100 | -1.42775200 | 0.89569100  |
| H        | -1.79976600 | -0.31509000 | 2.18357600  |
| C        | -3.43287000 | -1.78620700 | -0.41542700 |
| H        | -2.87106600 | -1.57759500 | -2.48812900 |

|          |             |             |             |
|----------|-------------|-------------|-------------|
| H        | -3.73426200 | -1.79282100 | 1.71759100  |
| H        | -4.28077400 | -2.43268300 | -0.62269300 |
| N        | -0.00912500 | 1.94531000  | -0.47088900 |
| C        | 1.12426600  | 2.84556800  | -0.24151300 |
| H        | 2.06861400  | 2.30041900  | -0.27817200 |
| H        | 1.14129000  | 3.60231200  | -1.03156800 |
| H        | 1.06268800  | 3.37945900  | 0.72347400  |
| C        | -1.25401500 | 2.72057400  | -0.41324700 |
| H        | -2.10934600 | 2.09511200  | -0.66755000 |
| H        | -1.43015900 | 3.16506200  | 0.57892000  |
| H        | -1.19290600 | 3.52973500  | -1.14739700 |
| O        | -0.07928500 | 1.12558200  | 1.79312400  |
| H        | 0.78853300  | 1.46643500  | 2.04705500  |
| <b>O</b> |             |             |             |
| Pd       | -1.13435500 | -0.67313800 | -0.91506500 |
| O        | -0.12181600 | 0.61011000  | -2.08824900 |
| C        | 0.69766000  | 1.54275700  | -1.63031300 |
| O        | 1.33645800  | 2.24134400  | -2.40099700 |
| C        | 0.84965500  | 1.75573600  | -0.10733900 |
| H        | 0.23217500  | 1.04685200  | 0.45117300  |
| N        | 2.23585400  | 1.49361300  | 0.26832600  |
| C        | 2.69218200  | 0.22293800  | 0.47976800  |
| O        | 1.97236000  | -0.76901900 | 0.55891300  |
| O        | 4.03463900  | 0.24350500  | 0.61784900  |
| C        | 4.80452800  | -0.98295200 | 0.88517800  |
| C        | 4.64818600  | -1.96731100 | -0.27836100 |
| H        | 5.32520300  | -2.81529800 | -0.13319400 |
| H        | 3.62701200  | -2.34307400 | -0.34296600 |
| H        | 4.90901200  | -1.48266900 | -1.22435400 |
| C        | 6.24106100  | -0.45884500 | 0.96165300  |
| H        | 6.52996000  | 0.01522900  | 0.01925100  |
| H        | 6.34099000  | 0.27808300  | 1.76371600  |
| H        | 6.93079500  | -1.28435700 | 1.16067000  |
| C        | 4.37449400  | -1.58950400 | 2.22478000  |
| H        | 4.45947600  | -0.84564000 | 3.02321200  |
| H        | 3.34483300  | -1.94553300 | 2.18148200  |
| H        | 5.02919000  | -2.43097900 | 2.47377700  |
| C        | 0.44867800  | 3.19832100  | 0.27969400  |
| H        | 1.15093600  | 3.86484700  | -0.23977800 |
| C        | -0.96763600 | 3.53000100  | -0.21506700 |
| H        | -1.03654300 | 3.48388000  | -1.30564100 |
| H        | -1.70746900 | 2.83603100  | 0.19930900  |
| H        | -1.24606400 | 4.54338600  | 0.09159100  |
| C        | 0.57111200  | 3.42010900  | 1.79345500  |

|              |             |             |             |
|--------------|-------------|-------------|-------------|
| H            | 1.57056200  | 3.17381000  | 2.16195300  |
| H            | 0.36264700  | 4.46504500  | 2.04518300  |
| H            | -0.14969600 | 2.79778400  | 2.33776600  |
| H            | 2.92610400  | 2.16807800  | -0.03443400 |
| C            | -4.56273000 | -0.57938500 | 1.12102900  |
| C            | -5.66005300 | 0.00271800  | 0.20159300  |
| H            | -5.38210200 | 0.99390500  | -0.16431100 |
| H            | -5.83797700 | -0.64548700 | -0.66262000 |
| H            | -6.59770800 | 0.08679800  | 0.76006800  |
| C            | -4.34459200 | 0.36018900  | 2.33181200  |
| H            | -5.27481200 | 0.44086200  | 2.90323400  |
| H            | -3.56959900 | -0.02753200 | 3.00109100  |
| H            | -4.05137500 | 1.36103200  | 2.00494800  |
| C            | -4.94272400 | -1.99095400 | 1.59696900  |
| H            | -5.09260500 | -2.66969900 | 0.75275600  |
| H            | -4.16729900 | -2.41967900 | 2.23703000  |
| H            | -5.87497500 | -1.94435500 | 2.16878800  |
| C            | -3.26376600 | -0.61682500 | 0.33838500  |
| O            | -2.80137200 | 0.43227300  | -0.23141100 |
| O            | -2.56846600 | -1.69085000 | 0.22380700  |
| O            | 1.00622800  | -2.75100300 | -1.60312800 |
| C            | 0.23301800  | -1.96751900 | -1.32144400 |
| <b>Int1'</b> |             |             |             |
| Pd           | -0.17553700 | -0.47963700 | 0.70048600  |
| O            | 2.83819000  | -3.06844200 | 1.95920500  |
| C            | 2.24172000  | -2.25538400 | 1.26483900  |
| O            | 0.95006000  | -2.05683100 | 1.38596300  |
| C            | 3.00623000  | -1.43243200 | 0.18881700  |
| H            | 2.39115800  | -1.38463700 | -0.71378100 |
| N            | 3.11626000  | -0.04573700 | 0.64364600  |
| C            | 2.75264200  | 1.01194900  | -0.14598200 |
| O            | 2.09098800  | 0.91127900  | -1.17316600 |
| O            | 3.20985700  | 2.15998600  | 0.40082400  |
| C            | 2.85870900  | 3.47510700  | -0.16872500 |
| C            | 1.34644300  | 3.69394000  | -0.06195800 |
| H            | 1.09289500  | 4.69026100  | -0.43857000 |
| H            | 0.79195900  | 2.95048200  | -0.63591600 |
| H            | 1.02614200  | 3.63862900  | 0.98338000  |
| C            | 3.61639000  | 4.44168500  | 0.74517800  |
| H            | 3.29397900  | 4.32533700  | 1.78388100  |
| H            | 4.69363600  | 4.25802100  | 0.69517800  |
| H            | 3.42653400  | 5.47413300  | 0.43740900  |
| C            | 3.36784100  | 3.58403700  | -1.60998900 |
| H            | 4.43614400  | 3.34929000  | -1.65360300 |



|   |             |             |             |
|---|-------------|-------------|-------------|
| H | 2.83032800  | 2.90489500  | -2.27120700 |
| H | 3.23220300  | 4.61022900  | -1.96661000 |
| C | 4.37412700  | -2.06044400 | -0.16689300 |
| H | 4.90871100  | -2.22214700 | 0.77773500  |
| C | 4.17438400  | -3.43279000 | -0.82938900 |
| H | 3.61689000  | -4.10826600 | -0.17788900 |
| H | 3.63764400  | -3.33296000 | -1.78240700 |
| H | 5.14173500  | -3.89632500 | -1.04890000 |
| C | 5.20878600  | -1.14283400 | -1.07258100 |
| H | 5.44037800  | -0.18607800 | -0.59516200 |
| H | 6.15934900  | -1.62386000 | -1.32538700 |
| H | 4.68416200  | -0.92737800 | -2.01104800 |
| H | 3.74475300  | 0.15819700  | 1.40885600  |
| C | -1.06185300 | -3.62305900 | -1.59204800 |
| C | -2.39374300 | -3.40083900 | -1.21683000 |
| C | -2.86263500 | -2.11722600 | -0.95212100 |
| C | -2.02027600 | -1.00025100 | -1.08335300 |
| C | -0.66495500 | -1.23049800 | -1.46370600 |
| C | -0.20543500 | -2.54120300 | -1.71707500 |
| H | -0.70730400 | -4.63107000 | -1.78183200 |
| H | -3.07233200 | -4.24344700 | -1.11827100 |
| H | -3.89085700 | -1.97867400 | -0.64296300 |
| H | 0.82624400  | -2.68962400 | -2.01933300 |
| C | -2.45343000 | 0.45090000  | -0.72563700 |
| C | -3.75736200 | 0.43644800  | 0.11015300  |
| C | -5.00649800 | 0.28777000  | -0.51221500 |
| C | -3.71335800 | 0.55612400  | 1.50212800  |
| C | -6.17875500 | 0.24417000  | 0.24327100  |
| H | -5.04859700 | 0.22496200  | -1.59474300 |
| C | -4.88601000 | 0.51325300  | 2.26029500  |
| C | -6.12250300 | 0.35360000  | 1.63480400  |
| H | -7.13711800 | 0.13084400  | -0.25627800 |
| H | -4.83120400 | 0.61209700  | 3.34098400  |
| H | -7.03475500 | 0.32200300  | 2.22377700  |
| N | -2.70834000 | 1.26617600  | -1.91820900 |
| C | -1.76868400 | 1.18375900  | -3.03375900 |
| H | -1.69312200 | 0.16353500  | -3.41210900 |
| H | -2.15995700 | 1.80178500  | -3.84815300 |
| H | -0.75898600 | 1.55256900  | -2.78956200 |
| C | -2.98742400 | 2.67411800  | -1.60663900 |
| H | -3.67678800 | 2.74860600  | -0.76545300 |
| H | -2.07780400 | 3.24047800  | -1.35844000 |
| H | -3.45798900 | 3.14185500  | -2.47817500 |
| O | -1.38485700 | 0.98210500  | 0.03452400  |

|              |             |             |             |
|--------------|-------------|-------------|-------------|
| O            | 0.48934500  | 0.99276300  | 3.32197800  |
| C            | 0.23767900  | 0.45878700  | 2.34840000  |
| H            | -0.01444200 | -0.39553100 | -1.71937000 |
| H            | -2.75517600 | 0.70300000  | 1.98503300  |
| <b>Int 2</b> |             |             |             |
| Pd           | 0.72536600  | 1.37813300  | -0.58580800 |
| O            | -2.95801600 | 2.79127300  | -2.04680800 |
| C            | -2.21315200 | 2.04772100  | -1.41966300 |
| O            | -1.01100400 | 1.70763800  | -1.76185700 |
| C            | -2.80835500 | 1.42592500  | -0.10963900 |
| H            | -3.88125700 | 1.31575700  | -0.27370500 |
| N            | -2.23762900 | 0.07337000  | 0.05047200  |
| C            | -2.88577200 | -1.06214200 | 0.10044800  |
| O            | -2.27166400 | -2.21746800 | -0.05318000 |
| O            | -4.16647200 | -1.04780900 | 0.34065800  |
| C            | -5.09431800 | -2.22928900 | 0.19782100  |
| C            | -4.75642000 | -3.26166500 | 1.27230700  |
| H            | -5.51874600 | -4.04651000 | 1.25927300  |
| H            | -3.78434400 | -3.72535200 | 1.10213800  |
| H            | -4.76397000 | -2.80038500 | 2.26390000  |
| C            | -6.45203700 | -1.57850900 | 0.45689000  |
| H            | -6.48242900 | -1.12599200 | 1.45141500  |
| H            | -6.66239900 | -0.80520100 | -0.28641800 |
| H            | -7.23635700 | -2.33808300 | 0.39827100  |
| C            | -5.00318500 | -2.77803800 | -1.22532500 |
| H            | -5.16773300 | -1.98231600 | -1.95762000 |
| H            | -4.04138400 | -3.25380500 | -1.42051000 |
| H            | -5.78716500 | -3.52863100 | -1.36292400 |
| C            | -2.56659200 | 2.28777300  | 1.15522000  |
| H            | -1.47864100 | 2.34346700  | 1.30347900  |
| C            | -3.10747200 | 3.71227600  | 0.95998000  |
| H            | -2.66759100 | 4.20559200  | 0.09144700  |
| H            | -4.19297800 | 3.69979800  | 0.81006600  |
| H            | -2.89777100 | 4.31436900  | 1.84977800  |
| C            | -3.18376200 | 1.63909900  | 2.40341300  |
| H            | -2.77925800 | 0.64005800  | 2.59289600  |
| H            | -2.97897300 | 2.24968400  | 3.28838400  |
| H            | -4.27219900 | 1.55314300  | 2.30268500  |
| H            | -1.22116300 | 0.02885200  | -0.09012200 |
| C            | 0.17805100  | -2.69792600 | -2.02132400 |
| C            | 1.13232100  | -3.37016100 | -1.24945600 |
| C            | 1.93891100  | -2.65745000 | -0.36127600 |
| C            | 1.78759200  | -1.27335600 | -0.20950400 |
| C            | 0.79228300  | -0.59674900 | -0.94370300 |

|              |             |             |             |
|--------------|-------------|-------------|-------------|
| C            | 0.00996500  | -1.31099700 | -1.86801100 |
| H            | -0.41787300 | -3.24129900 | -2.75104600 |
| H            | 1.26415500  | -4.44280300 | -1.36010600 |
| H            | 2.70302300  | -3.17633600 | 0.20868000  |
| H            | -0.70645600 | -0.77080600 | -2.48334800 |
| C            | 2.68018500  | -0.40621000 | 0.68257300  |
| C            | 4.15476000  | -0.63296200 | 0.26204300  |
| C            | 4.92050400  | -1.67923300 | 0.79622100  |
| C            | 4.72846000  | 0.18949200  | -0.71424100 |
| C            | 6.22825100  | -1.89949100 | 0.36011300  |
| H            | 4.48898300  | -2.30034500 | 1.57439200  |
| C            | 6.03458100  | -0.03286500 | -1.15333400 |
| C            | 6.78983700  | -1.07878300 | -0.61967800 |
| H            | 6.81014500  | -2.71009100 | 0.79135800  |
| H            | 6.46439100  | 0.61634100  | -1.91170900 |
| H            | 7.80771700  | -1.24942400 | -0.95967800 |
| N            | 2.52936900  | -0.80048300 | 2.10449400  |
| C            | 1.14790100  | -0.89386500 | 2.56695400  |
| H            | 0.58814700  | -1.61775800 | 1.96967300  |
| H            | 1.14927300  | -1.24722800 | 3.60385200  |
| H            | 0.61245100  | 0.07156600  | 2.54127900  |
| C            | 3.27973600  | 0.08055200  | 3.00685900  |
| H            | 4.31654200  | 0.16444300  | 2.67863500  |
| H            | 2.85381500  | 1.09392900  | 3.05783100  |
| H            | 3.27242000  | -0.35405200 | 4.01268400  |
| O            | 2.36253500  | 0.95367100  | 0.47267200  |
| O            | 1.11122100  | 4.47539400  | 0.07341400  |
| C            | 0.92178400  | 3.37706500  | -0.15935500 |
| H            | -1.39877800 | -2.11605000 | -0.51810800 |
| H            | 4.14026100  | 1.00828700  | -1.11158400 |
| <b>Int 3</b> |             |             |             |
| Pd           | 0.90102700  | 1.18558400  | -0.58425100 |
| O            | -3.19269900 | 1.78106300  | -2.11936000 |
| C            | -2.24071100 | 1.47975600  | -1.23591800 |
| O            | -1.06660100 | 1.41646200  | -1.59766200 |
| C            | -2.79153200 | 1.18552300  | 0.16229200  |
| H            | -3.85754800 | 1.41181300  | 0.13572700  |
| N            | -2.66152400 | -0.24345000 | 0.39943600  |
| C            | -3.66133700 | -1.18491000 | 0.26447500  |
| O            | -3.44435900 | -2.38061800 | 0.34102100  |
| O            | -4.86158300 | -0.59597500 | 0.06642500  |
| C            | -6.08747100 | -1.40576400 | -0.07271000 |
| C            | -6.33568300 | -2.20080800 | 1.21269900  |
| H            | -7.30150300 | -2.71194200 | 1.14586200  |

|   |             |             |             |
|---|-------------|-------------|-------------|
| H | -5.55383100 | -2.94388100 | 1.37016500  |
| H | -6.36678000 | -1.52823200 | 2.07571600  |
| C | -7.16691500 | -0.33945900 | -0.27266000 |
| H | -7.21640900 | 0.32881900  | 0.59210000  |
| H | -6.95770000 | 0.26080300  | -1.16301300 |
| H | -8.14401200 | -0.81506100 | -0.39755400 |
| C | -5.97848400 | -2.30863400 | -1.30552600 |
| H | -5.75288500 | -1.71160100 | -2.19497700 |
| H | -5.19890400 | -3.05926700 | -1.17445300 |
| H | -6.93385100 | -2.81663200 | -1.47192800 |
| C | -2.11249200 | 2.04451800  | 1.25506300  |
| H | -1.04550100 | 1.77994500  | 1.26677700  |
| C | -2.24249300 | 3.54034100  | 0.92930600  |
| H | -1.78105100 | 3.80233500  | -0.02929000 |
| H | -3.29472200 | 3.84597100  | 0.89045900  |
| H | -1.75160800 | 4.14120300  | 1.70041800  |
| C | -2.70946100 | 1.72618200  | 2.63174900  |
| H | -2.61622500 | 0.66524000  | 2.87475800  |
| H | -2.19350900 | 2.29981900  | 3.40771900  |
| H | -3.77284000 | 1.99181900  | 2.67018300  |
| H | -1.73102800 | -0.64507700 | 0.44606000  |
| C | 0.07888300  | -3.04587900 | -0.97138200 |
| C | 1.14006200  | -3.58555100 | -0.24335900 |
| C | 2.10792300  | -2.74629000 | 0.31072700  |
| C | 2.01269400  | -1.35857500 | 0.16636000  |
| C | 0.92073600  | -0.81260100 | -0.53560600 |
| C | -0.02359900 | -1.65882800 | -1.12670800 |
| H | -0.67197600 | -3.69498500 | -1.41261200 |
| H | 1.22050900  | -4.66143500 | -0.11544300 |
| H | 2.94604400  | -3.16923600 | 0.85592500  |
| H | -0.84357000 | -1.25041500 | -1.71034100 |
| C | 3.05207100  | -0.37006600 | 0.68399300  |
| C | 4.40559500  | -0.66958300 | -0.00839800 |
| C | 5.28081900  | -1.64420100 | 0.49315500  |
| C | 4.75175300  | -0.00321800 | -1.18912400 |
| C | 6.46807800  | -1.94842200 | -0.17422700 |
| H | 5.03331300  | -2.14339300 | 1.42412900  |
| C | 5.93741700  | -0.30976800 | -1.85945000 |
| C | 6.80022100  | -1.28487000 | -1.35689400 |
| H | 7.13622500  | -2.70246500 | 0.23389600  |
| H | 6.18907100  | 0.21920000  | -2.77516300 |
| H | 7.72411600  | -1.52172800 | -1.87758600 |
| N | 3.22724700  | -0.49485100 | 2.14258800  |
| C | 1.98542100  | -0.47124900 | 2.91211300  |

|   |             |             |             |
|---|-------------|-------------|-------------|
| H | 1.29721700  | -1.24024700 | 2.55726700  |
| H | 2.22031300  | -0.68396200 | 3.96085400  |
| H | 1.47198300  | 0.50485100  | 2.87315600  |
| C | 4.16108000  | 0.49048300  | 2.69722500  |
| H | 5.09496500  | 0.49052000  | 2.13373400  |
| H | 3.75281500  | 1.51290100  | 2.68724800  |
| H | 4.38671300  | 0.21814500  | 3.73435500  |
| O | 2.64517800  | 0.94756400  | 0.32786300  |
| O | 1.63642700  | 4.29808400  | -0.51148600 |
| C | 1.25603200  | 3.22467700  | -0.55612400 |
| H | 4.08600300  | 0.76308700  | -1.56781000 |
| H | -2.76370000 | 1.90489300  | -2.98581300 |

**Int 4**

|    |             |             |             |
|----|-------------|-------------|-------------|
| Pd | 0.65658500  | -0.81807900 | -0.73550000 |
| O  | -2.23067400 | 0.77390300  | -2.08759100 |
| C  | -2.91283300 | 1.53895000  | -1.43762200 |
| O  | -3.90610500 | 2.26919700  | -1.98652800 |
| C  | -2.75922000 | 1.81318600  | 0.06207700  |
| H  | -3.72671000 | 2.16827500  | 0.42805100  |
| N  | -2.40259900 | 0.59183300  | 0.76392600  |
| C  | -3.19265800 | -0.52656200 | 0.80976600  |
| O  | -2.79408800 | -1.61769700 | 1.19566100  |
| O  | -4.44462000 | -0.23999400 | 0.39083300  |
| C  | -5.49675800 | -1.27230200 | 0.34971100  |
| C  | -5.76157200 | -1.80716100 | 1.76022000  |
| H  | -6.62261000 | -2.48303700 | 1.73882600  |
| H  | -4.89639600 | -2.34957800 | 2.14182800  |
| H  | -5.99360900 | -0.98309000 | 2.44216000  |
| C  | -6.70304700 | -0.48868900 | -0.17375600 |
| H  | -6.96851100 | 0.31840300  | 0.51513900  |
| H  | -6.48156100 | -0.04773400 | -1.14997100 |
| H  | -7.56592700 | -1.15282300 | -0.27887700 |
| C  | -5.09793300 | -2.38079800 | -0.62978300 |
| H  | -4.86795100 | -1.95520600 | -1.61182600 |
| H  | -4.22712600 | -2.92785400 | -0.26807800 |
| H  | -5.93045900 | -3.08154700 | -0.74928000 |
| C  | -1.68350000 | 2.90242300  | 0.33043200  |
| H  | -0.71831100 | 2.47727000  | 0.02240600  |
| C  | -1.92597600 | 4.17790100  | -0.49017000 |
| H  | -1.86701200 | 4.00099700  | -1.56758900 |
| H  | -2.91041100 | 4.60821000  | -0.27475600 |
| H  | -1.16984300 | 4.92722600  | -0.23757700 |
| C  | -1.62228900 | 3.23184600  | 1.83007000  |
| H  | -1.43974600 | 2.34473200  | 2.44126600  |

|              |             |             |             |
|--------------|-------------|-------------|-------------|
| H            | -0.81841300 | 3.94836200  | 2.02523600  |
| H            | -2.56293700 | 3.68460400  | 2.16580200  |
| H            | -1.41771900 | 0.39392800  | 0.89723100  |
| C            | 0.90689600  | -1.08681200 | 3.61167700  |
| C            | 2.00764600  | -0.26269800 | 3.84444300  |
| C            | 2.67917100  | 0.32650200  | 2.77103000  |
| C            | 2.26367800  | 0.09038100  | 1.45774100  |
| C            | 1.15064700  | -0.73969000 | 1.22992000  |
| C            | 0.47038300  | -1.32459200 | 2.30237600  |
| H            | 0.37490900  | -1.53967400 | 4.44406800  |
| H            | 2.33692700  | -0.06665600 | 4.86129400  |
| H            | 3.51078200  | 1.00454000  | 2.94140900  |
| H            | -0.41837400 | -1.92585700 | 2.14150400  |
| C            | 2.93692700  | 0.67936300  | 0.21798800  |
| C            | 4.14772600  | -0.21420900 | -0.16866000 |
| C            | 4.21678900  | -0.80439900 | -1.43404700 |
| C            | 5.20056300  | -0.43839900 | 0.72972900  |
| C            | 5.29951100  | -1.61244200 | -1.79149600 |
| H            | 3.42027100  | -0.60533300 | -2.14065900 |
| C            | 6.28360100  | -1.24235300 | 0.37570900  |
| H            | 5.17628900  | 0.01953900  | 1.71225200  |
| C            | 6.33639800  | -1.83801300 | -0.88700800 |
| H            | 5.33305800  | -2.05945000 | -2.78178900 |
| H            | 7.08734900  | -1.40566900 | 1.08876800  |
| H            | 7.17844200  | -2.46738500 | -1.16147000 |
| N            | 3.42185800  | 2.04273200  | 0.47881200  |
| C            | 2.35947900  | 2.98679800  | 0.82904400  |
| H            | 1.72772100  | 2.57419200  | 1.61743800  |
| H            | 2.81744700  | 3.90761200  | 1.20761000  |
| H            | 1.71983300  | 3.24760500  | -0.02868400 |
| C            | 4.25605100  | 2.61702500  | -0.57941900 |
| H            | 5.10586300  | 1.96897800  | -0.79471700 |
| H            | 3.70265700  | 2.79139700  | -1.51600600 |
| H            | 4.64410000  | 3.58005700  | -0.23025300 |
| O            | 1.97403500  | 0.68798500  | -0.82397400 |
| O            | 0.27320000  | -0.21587000 | -3.89857700 |
| C            | 0.35552900  | -0.50326300 | -2.80302200 |
| H            | -3.90760700 | 2.06421700  | -2.93739300 |
| C            | -0.43864100 | -2.41681000 | -0.53271200 |
| O            | -0.94944200 | -3.43511100 | -0.47419800 |
| <b>Int 5</b> |             |             |             |
| Pd           | 0.40460300  | 1.13754100  | -0.90862500 |
| O            | -1.82094200 | 1.49948600  | -1.23562000 |
| C            | -2.82950000 | 1.61660000  | -0.55178100 |

|   |             |             |             |
|---|-------------|-------------|-------------|
| O | -3.91891900 | 2.21701500  | -1.04038500 |
| C | -3.00701700 | 1.14799400  | 0.89504000  |
| H | -4.06858800 | 1.26265800  | 1.12947600  |
| N | -2.64718000 | -0.24972400 | 1.03450200  |
| C | -3.35913300 | -1.30297500 | 0.50511200  |
| O | -3.00584000 | -2.46473500 | 0.60558400  |
| O | -4.47614400 | -0.84779800 | -0.10210100 |
| C | -5.41782000 | -1.77438500 | -0.76338900 |
| C | -6.00717700 | -2.74194700 | 0.26723300  |
| H | -6.79517000 | -3.33883700 | -0.20300200 |
| H | -5.24214700 | -3.41326000 | 0.65756800  |
| H | -6.45254200 | -2.18737500 | 1.09928500  |
| C | -6.49184500 | -0.82365500 | -1.29727200 |
| H | -6.97904700 | -0.28779600 | -0.47735300 |
| H | -6.05138300 | -0.08693000 | -1.97503300 |
| H | -7.25313400 | -1.38809900 | -1.84330900 |
| C | -4.70752500 | -2.50060600 | -1.90919200 |
| H | -4.26769400 | -1.77982300 | -2.60534400 |
| H | -3.91641100 | -3.14858300 | -1.53195800 |
| H | -5.43203100 | -3.10900500 | -2.46008800 |
| C | -2.17562000 | 2.02862900  | 1.86502200  |
| H | -1.11585100 | 1.83588000  | 1.64164900  |
| C | -2.44632700 | 3.52439200  | 1.64240200  |
| H | -2.15973100 | 3.85632300  | 0.63947000  |
| H | -3.50628800 | 3.76213300  | 1.78707600  |
| H | -1.87090500 | 4.11843000  | 2.35826300  |
| C | -2.45688300 | 1.63659700  | 3.32288500  |
| H | -2.27233000 | 0.57581100  | 3.50874800  |
| H | -1.81854400 | 2.21519200  | 3.99753500  |
| H | -3.50007500 | 1.84648300  | 3.58686200  |
| H | -1.71631700 | -0.49181100 | 1.34462800  |
| C | 0.81748100  | -3.28999500 | 1.97570600  |
| C | 2.00393400  | -2.82900600 | 2.55472500  |
| C | 2.67723600  | -1.74122900 | 2.00550800  |
| C | 2.18146000  | -1.06070800 | 0.88368000  |
| C | 0.98182700  | -1.52389800 | 0.31566100  |
| C | 0.31287900  | -2.64433100 | 0.85492100  |
| H | 0.29181200  | -4.14314800 | 2.39398900  |
| H | 2.40927300  | -3.32182100 | 3.43433900  |
| H | 3.60231100  | -1.39765600 | 2.45264000  |
| H | -0.61712600 | -2.96530900 | 0.39820100  |
| C | 3.02231200  | 0.08417800  | 0.25183200  |
| C | 4.26690900  | -0.62729300 | -0.36578000 |
| C | 5.42193900  | -0.89709100 | 0.38090700  |

|              |             |             |             |
|--------------|-------------|-------------|-------------|
| C            | 4.21460800  | -1.05440000 | -1.69796100 |
| C            | 6.49856600  | -1.57622900 | -0.19231000 |
| H            | 5.48155000  | -0.55193500 | 1.40755900  |
| C            | 5.28750300  | -1.74063700 | -2.26857700 |
| H            | 3.32959400  | -0.83126600 | -2.28198900 |
| C            | 6.43474400  | -2.00559800 | -1.51880100 |
| H            | 7.38930000  | -1.76761400 | 0.40056900  |
| H            | 5.22693300  | -2.06492900 | -3.30415400 |
| H            | 7.27137000  | -2.53710100 | -1.96402600 |
| N            | 3.47835400  | 0.98755200  | 1.34645200  |
| C            | 2.40599500  | 1.52434600  | 2.17862600  |
| H            | 1.80691200  | 0.71942700  | 2.60865500  |
| H            | 2.85064800  | 2.09099500  | 3.00444700  |
| H            | 1.72864700  | 2.20755800  | 1.63367300  |
| C            | 4.29614100  | 2.09631500  | 0.84624000  |
| H            | 5.10025200  | 1.72187800  | 0.21217600  |
| H            | 3.71346700  | 2.82470200  | 0.26139000  |
| H            | 4.74509400  | 2.61736300  | 1.69930000  |
| O            | 2.39870100  | 0.75650400  | -0.78078200 |
| O            | 1.40703700  | 4.18528800  | -1.44031900 |
| C            | 0.84932200  | 3.21175300  | -1.23969300 |
| H            | -3.71418600 | 2.49253900  | -1.95175400 |
| C            | 0.27901600  | -0.84051600 | -0.80158300 |
| O            | -0.45211200 | -1.37133400 | -1.60191900 |
| <b>Int 6</b> |             |             |             |
| Pd           | 0.52397500  | 1.44087000  | -0.84501000 |
| O            | -1.97076000 | 1.40467700  | -0.35083200 |
| C            | -2.89070800 | 1.37728400  | 0.45066700  |
| O            | -3.81612200 | 2.34696200  | 0.50303900  |
| C            | -3.12755400 | 0.27886500  | 1.48996600  |
| H            | -4.16637600 | 0.36072000  | 1.81655100  |
| N            | -2.92794500 | -1.03180000 | 0.89806000  |
| C            | -3.76970900 | -1.59188700 | -0.03771100 |
| O            | -3.47984500 | -2.58646600 | -0.68197100 |
| O            | -4.92689700 | -0.89716000 | -0.11098200 |
| C            | -6.01818300 | -1.32352400 | -1.00839600 |
| C            | -6.50954000 | -2.71715600 | -0.60564300 |
| H            | -7.39183900 | -2.97920500 | -1.19841800 |
| H            | -5.73701200 | -3.46799700 | -0.77295400 |
| H            | -6.79529000 | -2.72957200 | 0.45093100  |
| C            | -7.09240000 | -0.26591400 | -0.74392200 |
| H            | -7.40870100 | -0.28765800 | 0.30305900  |
| H            | -6.71072300 | 0.73459600  | -0.96756600 |
| H            | -7.96674200 | -0.45376600 | -1.37383400 |



|   |             |             |             |
|---|-------------|-------------|-------------|
| C | -5.54511500 | -1.27011400 | -2.46439100 |
| H | -5.16661700 | -0.27168800 | -2.70613200 |
| H | -4.75742800 | -2.00103900 | -2.64753900 |
| H | -6.38742800 | -1.48305800 | -3.13043400 |
| C | -2.19206800 | 0.46580200  | 2.71671300  |
| H | -1.16523000 | 0.30424100  | 2.35968000  |
| C | -2.27897800 | 1.88616600  | 3.29488700  |
| H | -1.95457500 | 2.65048300  | 2.58205300  |
| H | -3.30263900 | 2.12712000  | 3.60268500  |
| H | -1.63709700 | 1.96888700  | 4.17691200  |
| C | -2.51083500 | -0.58189500 | 3.79287000  |
| H | -2.46016400 | -1.59894400 | 3.39770600  |
| H | -1.80080800 | -0.49961100 | 4.62164100  |
| H | -3.51763600 | -0.42734100 | 4.19861900  |
| H | -1.97223300 | -1.35803500 | 0.80524100  |
| C | -0.03322900 | -2.76162700 | -0.55687000 |
| C | 1.11751600  | -3.25462900 | 0.05978100  |
| C | 2.18813200  | -2.39994900 | 0.31652800  |
| C | 2.11967600  | -1.03613100 | -0.01455200 |
| C | 0.94598000  | -0.52089900 | -0.57856500 |
| C | -0.10839300 | -1.40228600 | -0.87503300 |
| H | -0.87468700 | -3.40996200 | -0.78308500 |
| H | 1.19326600  | -4.30605200 | 0.32240100  |
| H | 3.08871600  | -2.80111400 | 0.76724800  |
| H | -1.00954700 | -1.03037500 | -1.35446100 |
| C | 3.34033500  | -0.13663100 | 0.25740100  |
| C | 4.64948000  | -0.91693800 | 0.01126400  |
| C | 5.13757500  | -1.10435500 | -1.28868300 |
| C | 5.33095500  | -1.51264900 | 1.07964600  |
| C | 6.28498500  | -1.86527100 | -1.51122600 |
| H | 4.62335500  | -0.64475100 | -2.12460000 |
| C | 6.48033500  | -2.27377200 | 0.85592800  |
| H | 4.95231800  | -1.37101000 | 2.08612500  |
| C | 6.96215700  | -2.45283900 | -0.44063600 |
| H | 6.65163900  | -1.99609500 | -2.52544700 |
| H | 6.99765200  | -2.72485600 | 1.69828600  |
| H | 7.85676400  | -3.04361500 | -0.61626300 |
| N | 3.34501000  | 0.43171100  | 1.58436600  |
| C | 2.08387900  | 0.75102800  | 2.24017100  |
| H | 1.40590700  | -0.10189400 | 2.20383800  |
| H | 2.29827300  | 0.97444000  | 3.29120500  |
| H | 1.56637700  | 1.62361000  | 1.80496300  |
| C | 4.33915900  | 1.48572100  | 1.79774400  |
| H | 5.27986300  | 1.22469300  | 1.31252700  |

|              |             |             |             |
|--------------|-------------|-------------|-------------|
| H            | 4.01240700  | 2.46059000  | 1.40412100  |
| H            | 4.52126600  | 1.59216000  | 2.87258200  |
| O            | 3.44022600  | 0.93535900  | -0.77865100 |
| O            | -0.04131700 | 4.54748000  | -1.32136300 |
| C            | 0.12993500  | 3.43691900  | -1.12763700 |
| H            | -3.58251400 | 3.00834200  | -0.17179600 |
| C            | 2.45519300  | 1.65424000  | -1.32448900 |
| O            | 2.71517900  | 2.52327200  | -2.12514900 |
| <b>Int 7</b> |             |             |             |
| Pd           | 3.55216100  | -0.44347200 | -0.01606600 |
| O            | 1.37536100  | -0.18074400 | 0.09693000  |
| C            | 0.63891700  | 0.56029400  | -0.53703300 |
| O            | 1.13862000  | 1.32159300  | -1.51287100 |
| C            | -0.84563200 | 0.68933800  | -0.21922800 |
| H            | -1.40043400 | 0.75039200  | -1.16379500 |
| N            | -1.25677300 | -0.50726600 | 0.48291600  |
| C            | -2.52410500 | -1.03401900 | 0.50167800  |
| O            | -2.80327200 | -2.07107600 | 1.07455200  |
| O            | -3.37584600 | -0.23711800 | -0.19129800 |
| C            | -4.80078900 | -0.59914900 | -0.33202600 |
| C            | -5.46691500 | -0.63832200 | 1.04671800  |
| H            | -6.54337000 | -0.79802200 | 0.92823300  |
| H            | -5.05579600 | -1.44286900 | 1.65635600  |
| H            | -5.32185200 | 0.31333500  | 1.56817800  |
| C            | -5.35540800 | 0.55301000  | -1.17300200 |
| H            | -5.22554500 | 1.50900400  | -0.65694300 |
| H            | -4.84677100 | 0.60778800  | -2.14017900 |
| H            | -6.42351900 | 0.40284700  | -1.35469300 |
| C            | -4.92886500 | -1.93012500 | -1.07930000 |
| H            | -4.40712700 | -1.88027800 | -2.04043200 |
| H            | -4.51377400 | -2.74978400 | -0.49276500 |
| H            | -5.98521400 | -2.13710100 | -1.27833200 |
| C            | -1.14522000 | 2.00183700  | 0.58798300  |
| H            | -2.21216800 | 1.90760800  | 0.81884200  |
| C            | -0.36288600 | 2.06944600  | 1.90475500  |
| H            | -0.50621500 | 1.16229600  | 2.49787000  |
| H            | 0.71222900  | 2.19853900  | 1.73493300  |
| H            | -0.70559500 | 2.91847200  | 2.50394800  |
| C            | -0.95890600 | 3.27251700  | -0.25377900 |
| H            | -1.49640600 | 3.21363600  | -1.20945700 |
| H            | -1.35725200 | 4.13937800  | 0.28145100  |
| H            | 0.09741200  | 3.48565800  | -0.45379400 |
| H            | -0.54360500 | -1.06183000 | 0.93573700  |
| O            | 6.52691500  | -0.83187200 | -0.10462900 |

|              |             |             |             |
|--------------|-------------|-------------|-------------|
| C            | 5.38280900  | -0.68289500 | -0.06831200 |
| H            | 0.44079100  | 1.83366500  | -1.94875200 |
| <b>Int 8</b> |             |             |             |
| Pd           | 0.03191900  | 0.02436700  | 0.42728100  |
| O            | -2.88946100 | -2.09540600 | 2.40630600  |
| C            | -2.28696300 | -2.06708800 | 1.36006900  |
| O            | -1.15234200 | -2.77667200 | 1.20091400  |
| C            | -2.89294300 | -1.34729300 | 0.14060800  |
| H            | -3.68764800 | -0.73321400 | 0.56196900  |
| N            | -1.94511100 | -0.40899200 | -0.56385500 |
| C            | -2.46547800 | 0.88133600  | -0.96085400 |
| O            | -2.23406300 | 1.33140100  | -2.06054000 |
| O            | -3.15919600 | 1.43359400  | 0.02824700  |
| C            | -3.79131300 | 2.78097600  | -0.12364300 |
| C            | -4.82968600 | 2.72710600  | -1.24571400 |
| H            | -5.37056900 | 3.67780600  | -1.27899200 |
| H            | -4.36058000 | 2.56200400  | -2.21628200 |
| H            | -5.55856300 | 1.93257700  | -1.05813100 |
| C            | -4.45327700 | 2.98190200  | 1.23916600  |
| H            | -5.19187900 | 2.19923200  | 1.43395600  |
| H            | -3.70971600 | 2.96400600  | 2.04027200  |
| H            | -4.96197400 | 3.94976900  | 1.26154300  |
| C            | -2.70471000 | 3.82739700  | -0.37633800 |
| H            | -1.95985200 | 3.81199900  | 0.42440000  |
| H            | -2.20612600 | 3.66261000  | -1.33198400 |
| H            | -3.16355200 | 4.82082400  | -0.38869300 |
| C            | -3.49865400 | -2.37448800 | -0.85800100 |
| H            | -2.65802300 | -2.91768900 | -1.31570600 |
| C            | -4.38345200 | -3.40424200 | -0.13617700 |
| H            | -3.82361400 | -3.99830500 | 0.58996000  |
| H            | -5.20454500 | -2.91292200 | 0.39670400  |
| H            | -4.81935600 | -4.09175400 | -0.86705100 |
| C            | -4.29360400 | -1.67331700 | -1.97191800 |
| H            | -3.69558200 | -0.96246100 | -2.54986200 |
| H            | -4.68489100 | -2.41486700 | -2.67463300 |
| H            | -5.14969600 | -1.13195800 | -1.55223000 |
| H            | -1.60794800 | -0.81826700 | -1.43264500 |
| C            | 1.46973400  | -2.96491800 | -2.44829300 |
| C            | 2.82507700  | -2.97712100 | -2.12628300 |
| C            | 3.31450100  | -2.10611600 | -1.15161600 |
| C            | 2.45936900  | -1.22720600 | -0.48264400 |
| C            | 1.07926300  | -1.22361500 | -0.78065700 |
| C            | 0.60598900  | -2.09189900 | -1.77535500 |
| H            | 1.07916600  | -3.62865100 | -3.21493700 |

|            |             |             |             |
|------------|-------------|-------------|-------------|
| H          | 3.50083000  | -3.66054200 | -2.63264800 |
| H          | 4.36734600  | -2.11778500 | -0.88740100 |
| H          | -0.44374900 | -2.11966100 | -2.06546000 |
| C          | 2.94395400  | -0.20838800 | 0.54873400  |
| C          | 3.65438700  | 0.94030300  | -0.21711600 |
| C          | 4.95314900  | 0.78050200  | -0.72315800 |
| C          | 2.99508800  | 2.15134100  | -0.44770200 |
| C          | 5.56909600  | 1.80090200  | -1.44722600 |
| H          | 5.49158500  | -0.13975500 | -0.52334200 |
| C          | 3.60787100  | 3.17281000  | -1.17773700 |
| H          | 2.00148700  | 2.28989100  | -0.03880800 |
| C          | 4.89619000  | 3.00204300  | -1.68346800 |
| H          | 6.57841100  | 1.65840100  | -1.82450500 |
| H          | 3.07644500  | 4.10612700  | -1.34541700 |
| H          | 5.37451100  | 3.79651400  | -2.24966400 |
| N          | 3.89286800  | -0.81552000 | 1.49248000  |
| C          | 3.35936300  | -1.98504300 | 2.19655800  |
| H          | 2.98391200  | -2.72308700 | 1.48585900  |
| H          | 4.17067700  | -2.44738400 | 2.76890000  |
| H          | 2.54657500  | -1.72845300 | 2.89244300  |
| C          | 4.44853400  | 0.12653500  | 2.47058900  |
| H          | 4.85957300  | 1.00263000  | 1.96828700  |
| H          | 3.70308000  | 0.46421700  | 3.20644600  |
| H          | 5.26169100  | -0.37081400 | 3.01052900  |
| O          | 1.82015900  | 0.29317000  | 1.25391700  |
| O          | -0.94944000 | 1.96098600  | 2.75204900  |
| C          | -0.69680600 | 1.27845700  | 1.87578900  |
| H          | -0.63331300 | -2.51218200 | 0.41897400  |
| <b>TS1</b> |             |             |             |
| Pd         | -0.34993000 | -1.44217700 | -0.70238300 |
| O          | 3.73173900  | -1.79225300 | -1.76070700 |
| C          | 2.75014900  | -1.45685500 | -1.10910800 |
| O          | 1.54632300  | -1.36478600 | -1.60271100 |
| C          | 3.00460400  | -1.06313200 | 0.38512900  |
| H          | 3.94658800  | -0.51174200 | 0.38765700  |
| N          | 1.95420600  | -0.15126700 | 0.87204800  |
| C          | 1.84487700  | 1.12504600  | 0.47370500  |
| O          | 0.71137800  | 1.67290400  | 0.29209100  |
| O          | 2.98895300  | 1.75711000  | 0.31323600  |
| C          | 3.10367200  | 3.16907300  | -0.15910000 |
| C          | 2.42127000  | 4.09621000  | 0.84804000  |
| H          | 2.61752900  | 5.13555600  | 0.56671900  |
| H          | 1.34237400  | 3.93956300  | 0.87031300  |
| H          | 2.82588000  | 3.93532000  | 1.85178700  |

|   |             |             |             |
|---|-------------|-------------|-------------|
| C | 4.61926200  | 3.37265200  | -0.16282200 |
| H | 5.03204800  | 3.23042300  | 0.83962200  |
| H | 5.10356100  | 2.66632400  | -0.84248200 |
| H | 4.85298300  | 4.38856700  | -0.49340100 |
| C | 2.52913800  | 3.29347900  | -1.57052500 |
| H | 2.98875100  | 2.55790400  | -2.23740700 |
| H | 1.44720800  | 3.16025100  | -1.58227000 |
| H | 2.75751500  | 4.29091000  | -1.95887100 |
| C | 3.13595600  | -2.27193500 | 1.34518000  |
| H | 2.16631400  | -2.79375400 | 1.35261700  |
| C | 4.20537600  | -3.26762200 | 0.87282400  |
| H | 4.01040800  | -3.63678800 | -0.13478300 |
| H | 5.19423400  | -2.79608400 | 0.86017600  |
| H | 4.24733600  | -4.11862600 | 1.56056200  |
| C | 3.43165000  | -1.80559600 | 2.77992600  |
| H | 2.66696900  | -1.12231800 | 3.15954400  |
| H | 3.48478800  | -2.66522500 | 3.45569200  |
| H | 4.39676800  | -1.28711700 | 2.82522900  |
| H | 1.04404500  | -0.58690700 | 1.00488800  |
| C | -2.00869000 | 2.01857000  | 3.76584400  |
| C | -2.69360200 | 2.64891100  | 2.72362900  |
| C | -2.96016600 | 1.95989000  | 1.54065800  |
| C | -2.54837500 | 0.62969400  | 1.38050800  |
| C | -1.87020700 | 0.00365300  | 2.43090000  |
| C | -1.60038200 | 0.69305000  | 3.61615400  |
| H | -1.79936400 | 2.55625200  | 4.68644600  |
| H | -3.01993500 | 3.67981500  | 2.83187300  |
| H | -3.49379600 | 2.45741900  | 0.73688200  |
| H | -1.58018200 | -1.03392700 | 2.30811500  |
| H | -1.07744000 | 0.18997700  | 4.42544400  |
| C | -2.83892100 | -0.14687900 | 0.07331400  |
| C | -2.27409900 | 0.65762900  | -1.10184400 |
| C | -3.02875900 | 1.50835100  | -1.90889700 |
| C | -0.89638200 | 0.44986800  | -1.38308600 |
| C | -2.44396100 | 2.11055900  | -3.02654400 |
| H | -4.07852700 | 1.66073700  | -1.67739900 |
| C | -0.35040800 | 1.01067100  | -2.56088400 |
| C | -1.11061300 | 1.85271900  | -3.36768300 |
| H | -3.04190100 | 2.76738400  | -3.65333700 |
| H | 0.68283100  | 0.78705900  | -2.81146100 |
| H | -0.67975600 | 2.29737800  | -4.26022000 |
| N | -4.29281100 | -0.33210100 | -0.07783400 |
| C | -4.99298900 | -0.80896300 | 1.11806400  |
| H | -4.82792000 | -0.13536100 | 1.95915500  |

|   |             |             |             |
|---|-------------|-------------|-------------|
| H | -6.06643600 | -0.82283000 | 0.90194600  |
| H | -4.69398500 | -1.82588600 | 1.41760500  |
| C | -4.64928100 | -1.18402400 | -1.22035900 |
| H | -4.12031600 | -0.86534400 | -2.11971800 |
| H | -4.41526200 | -2.24361900 | -1.04794000 |
| H | -5.72491300 | -1.08801100 | -1.40414200 |
| O | -2.20475300 | -1.41102900 | 0.07702100  |
| O | -0.18405700 | -4.46529900 | 0.11770100  |
| C | -0.17547300 | -3.35683700 | -0.14445400 |
| H | -0.05994000 | 0.95413000  | -0.35320200 |

**TS2**

|    |            |             |             |
|----|------------|-------------|-------------|
| Pd | 0.06158100 | 0.19335500  | -0.14162100 |
| O  | 1.32146200 | -2.46667500 | -2.22248800 |
| C  | 1.45523200 | -2.28425000 | -1.01544000 |
| O  | 0.71148500 | -2.73481900 | -0.05121400 |
| C  | 2.65619600 | -1.42374300 | -0.51868400 |
| H  | 3.02802600 | -0.80944500 | -1.33938700 |
| N  | 2.09852400 | -0.48284400 | 0.52657800  |
| C  | 2.83650100 | 0.66415000  | 0.97416800  |
| O  | 2.84150900 | 0.99257100  | 2.14118300  |
| O  | 3.40995600 | 1.28671000  | -0.05413400 |
| C  | 4.17135500 | 2.55704500  | 0.13585300  |
| C  | 5.35669500 | 2.31877800  | 1.07362700  |
| H  | 5.96546400 | 3.22743400  | 1.11496700  |
| H  | 5.02384300 | 2.07778600  | 2.08348100  |
| H  | 5.98790200 | 1.50697000  | 0.70124100  |
| C  | 4.64465400 | 2.86574100  | -1.28472100 |
| H  | 5.27821300 | 2.06026100  | -1.66632800 |
| H  | 3.79503900 | 2.98907800  | -1.96162700 |
| H  | 5.22498900 | 3.79271200  | -1.28724100 |
| C  | 3.22553500 | 3.64129600  | 0.65673100  |
| H  | 2.37839700 | 3.77629500  | -0.02224700 |
| H  | 2.85233800 | 3.39719800  | 1.65204600  |
| H  | 3.76503300 | 4.59189700  | 0.71116900  |
| C  | 3.76958100 | -2.34745700 | 0.03854200  |
| H  | 3.28827600 | -2.97715300 | 0.80018900  |
| C  | 4.28735100 | -3.26549500 | -1.08314200 |
| H  | 3.48216200 | -3.82699700 | -1.56060500 |
| H  | 4.78914600 | -2.67949000 | -1.86210200 |
| H  | 5.01452000 | -3.97728100 | -0.67961500 |
| C  | 4.94434700 | -1.60362000 | 0.69260100  |
| H  | 4.64562300 | -1.01463200 | 1.56485900  |
| H  | 5.69245500 | -2.32478200 | 1.03756800  |
| H  | 5.43589100 | -0.93551500 | -0.02328300 |

|            |             |             |             |
|------------|-------------|-------------|-------------|
| H          | 1.86126400  | -1.02399400 | 1.35568700  |
| C          | -1.57872500 | -1.73687100 | 3.45943600  |
| C          | -2.93149000 | -1.51623000 | 3.18829200  |
| C          | -3.34542100 | -1.07779700 | 1.92880800  |
| C          | -2.42279000 | -0.87499200 | 0.90131300  |
| C          | -1.04266600 | -1.15671200 | 1.14238500  |
| C          | -0.65016800 | -1.54882600 | 2.44351000  |
| H          | -1.26010800 | -2.06660600 | 4.44352800  |
| H          | -3.67237300 | -1.67287700 | 3.96758900  |
| H          | -4.39421500 | -0.86608000 | 1.75596500  |
| H          | 0.39071000  | -1.79510400 | 2.63197300  |
| C          | -2.81478400 | -0.22956900 | -0.43633100 |
| C          | -4.02960000 | 0.72030100  | -0.23037900 |
| C          | -5.33971200 | 0.25709300  | -0.41499100 |
| C          | -3.83450700 | 2.03958700  | 0.19694500  |
| C          | -6.43020700 | 1.09743400  | -0.18092800 |
| H          | -5.48839800 | -0.76272400 | -0.75287100 |
| C          | -4.92508300 | 2.87844400  | 0.43050300  |
| H          | -2.82305600 | 2.40262000  | 0.33354700  |
| C          | -6.22736500 | 2.41178000  | 0.24236300  |
| H          | -7.43882900 | 0.72279800  | -0.33362600 |
| H          | -4.75548000 | 3.90084400  | 0.75749500  |
| H          | -7.07552500 | 3.06651800  | 0.42225300  |
| N          | -3.16540300 | -1.21887300 | -1.44753000 |
| C          | -2.42199200 | -2.48040900 | -1.49723500 |
| H          | -2.41501400 | -2.96788600 | -0.52149700 |
| H          | -2.94381200 | -3.14714300 | -2.19229800 |
| H          | -1.38396300 | -2.38382800 | -1.84720800 |
| C          | -3.29252000 | -0.64921100 | -2.79122100 |
| H          | -3.85699300 | 0.28417900  | -2.75976300 |
| H          | -2.31645600 | -0.44502300 | -3.25601500 |
| H          | -3.83421400 | -1.35845800 | -3.42621900 |
| O          | -1.74339700 | 0.63785700  | -0.81889600 |
| O          | 0.96258800  | 2.23806800  | -2.31759200 |
| C          | 0.71819900  | 1.48847500  | -1.49679100 |
| H          | -0.30593500 | -1.84322700 | 0.37343600  |
| <b>TS3</b> |             |             |             |
| Pd         | 0.58007800  | -0.95978800 | -0.47964400 |
| O          | -1.99006100 | -0.05628000 | -2.11940700 |
| C          | -2.67574400 | 0.90945600  | -1.85307800 |
| O          | -3.59691800 | 1.39894000  | -2.70759800 |
| C          | -2.60193700 | 1.72186400  | -0.55842200 |
| H          | -3.57273300 | 2.20977500  | -0.42773100 |
| N          | -2.34613300 | 0.84716000  | 0.57413700  |

|   |             |             |             |
|---|-------------|-------------|-------------|
| C | -3.15025900 | -0.19700200 | 0.95352100  |
| O | -2.82144200 | -1.03658300 | 1.77981900  |
| O | -4.33402100 | -0.13619200 | 0.30488100  |
| C | -5.37364700 | -1.16113900 | 0.50960700  |
| C | -5.84698500 | -1.14128100 | 1.96620500  |
| H | -6.69442800 | -1.82433500 | 2.08474700  |
| H | -5.04800300 | -1.44979000 | 2.64067700  |
| H | -6.17983200 | -0.13634500 | 2.24449400  |
| C | -6.48526900 | -0.69354500 | -0.43299900 |
| H | -6.84077000 | 0.30099800  | -0.14840000 |
| H | -6.12181700 | -0.64603000 | -1.46353700 |
| H | -7.32930900 | -1.38831500 | -0.39262900 |
| C | -4.83936600 | -2.53369800 | 0.08764400  |
| H | -4.45087800 | -2.49159400 | -0.93480100 |
| H | -4.04253100 | -2.86542500 | 0.75371000  |
| H | -5.65144700 | -3.26745300 | 0.11457100  |
| C | -1.48964800 | 2.80673500  | -0.63666500 |
| H | -0.52642600 | 2.27862200  | -0.68491900 |
| C | -1.61443500 | 3.67846400  | -1.89501800 |
| H | -1.48860200 | 3.10242100  | -2.81567200 |
| H | -2.58770800 | 4.18040300  | -1.94154100 |
| H | -0.83848300 | 4.44965200  | -1.88399700 |
| C | -1.52053700 | 3.68471000  | 0.62479200  |
| H | -1.41301800 | 3.10021000  | 1.54231100  |
| H | -0.70570700 | 4.41455400  | 0.59358000  |
| H | -2.46426700 | 4.23965600  | 0.69021000  |
| H | -1.39130900 | 0.75997600  | 0.89508800  |
| C | 0.52702200  | 0.50791800  | 3.78262200  |
| C | 1.58234300  | 1.41164900  | 3.66173000  |
| C | 2.33077000  | 1.47615400  | 2.48252900  |
| C | 2.07033900  | 0.63113600  | 1.40098200  |
| C | 1.06945400  | -0.35613600 | 1.58799000  |
| C | 0.26851100  | -0.38506400 | 2.74253700  |
| H | -0.08225500 | 0.47877700  | 4.68053800  |
| H | 1.81031600  | 2.09193400  | 4.47791700  |
| H | 3.11312400  | 2.21788600  | 2.35605600  |
| H | -0.53882200 | -1.10475900 | 2.82848200  |
| C | 2.69496900  | 0.86226600  | -0.01684400 |
| C | 3.74395900  | -0.25425300 | -0.26180500 |
| C | 3.79370800  | -0.88478800 | -1.51037600 |
| C | 4.66116900  | -0.63941100 | 0.72528700  |
| C | 4.73235100  | -1.88626500 | -1.76604900 |
| H | 3.09056500  | -0.56273300 | -2.27095300 |
| C | 5.59866500  | -1.64270200 | 0.47301100  |



|   |             |             |             |
|---|-------------|-------------|-------------|
| H | 4.64302600  | -0.15368900 | 1.69653600  |
| C | 5.63574900  | -2.27177100 | -0.77358700 |
| H | 4.76043200  | -2.36338000 | -2.74230900 |
| H | 6.29899300  | -1.93435300 | 1.25106900  |
| H | 6.36324500  | -3.05466000 | -0.96907900 |
| N | 3.38639400  | 2.18292800  | -0.01448900 |
| C | 2.44050100  | 3.30108400  | -0.10291000 |
| H | 1.65223600  | 3.19826200  | 0.64496400  |
| H | 2.98112100  | 4.23305000  | 0.09921900  |
| H | 1.96189600  | 3.37536700  | -1.08970400 |
| C | 4.41599100  | 2.35150800  | -1.04218600 |
| H | 5.21963800  | 1.62592300  | -0.91435100 |
| H | 4.02359700  | 2.26352800  | -2.06875100 |
| H | 4.84702600  | 3.35236600  | -0.93226300 |
| O | 1.66664200  | 0.83982500  | -0.95019600 |
| O | -0.21805200 | -2.69352700 | -2.92847300 |
| C | 0.07768900  | -2.04172100 | -2.03809000 |
| H | -3.54397800 | 0.85573000  | -3.51272600 |
| C | 0.99045800  | -2.05935100 | 0.99191700  |
| O | 1.36469900  | -3.03062300 | 1.51237800  |

**TS4**

|    |             |             |             |
|----|-------------|-------------|-------------|
| Pd | -0.11332400 | -1.38422500 | 0.26999600  |
| O  | 1.43826000  | 0.04387700  | 1.32204900  |
| C  | 2.25978700  | 0.93476200  | 1.47897700  |
| O  | 2.84043100  | 1.13600600  | 2.66785700  |
| C  | 2.74123900  | 1.92295500  | 0.41668000  |
| H  | 3.76670800  | 2.19015000  | 0.68694700  |
| N  | 2.73592600  | 1.30835300  | -0.89406600 |
| C  | 3.51472100  | 0.23111200  | -1.24964200 |
| O  | 3.33149000  | -0.41240400 | -2.26985900 |
| O  | 4.48337800  | 0.02446900  | -0.32912500 |
| C  | 5.49361700  | -1.03757600 | -0.50999600 |
| C  | 6.30643100  | -0.76949700 | -1.78011400 |
| H  | 7.12555400  | -1.49241900 | -1.84936900 |
| H  | 5.68311900  | -0.85815500 | -2.67019700 |
| H  | 6.74207900  | 0.23414200  | -1.74876800 |
| C  | 6.36359500  | -0.88204400 | 0.73932100  |
| H  | 6.82183900  | 0.11065500  | 0.77192700  |
| H  | 5.76641600  | -1.01642900 | 1.64615600  |
| H  | 7.16048200  | -1.63126700 | 0.73615600  |
| C  | 4.80999000  | -2.40816000 | -0.53397600 |
| H  | 4.20149200  | -2.54639100 | 0.36575000  |
| H  | 4.17336700  | -2.51308000 | -1.41257300 |
| H  | 5.57036100  | -3.19550100 | -0.55153600 |

|   |             |             |             |
|---|-------------|-------------|-------------|
| C | 1.87569700  | 3.21913400  | 0.39082000  |
| H | 0.88314200  | 2.92913700  | 0.01918400  |
| C | 1.70254100  | 3.85270100  | 1.77870700  |
| H | 1.16113600  | 3.20598400  | 2.47409700  |
| H | 2.67131600  | 4.09521600  | 2.22918500  |
| H | 1.13398700  | 4.78271400  | 1.68704900  |
| C | 2.48751400  | 4.23202500  | -0.58976100 |
| H | 2.61935800  | 3.80957300  | -1.58835900 |
| H | 1.84015300  | 5.11024900  | -0.67316400 |
| H | 3.46774800  | 4.57090600  | -0.23440600 |
| H | 1.87145400  | 1.36104100  | -1.42016800 |
| C | -0.54892400 | 1.48631700  | -2.88979500 |
| C | -1.69230300 | 2.19053900  | -2.50140600 |
| C | -2.46309000 | 1.74958100  | -1.42581500 |
| C | -2.10345800 | 0.60835400  | -0.68855600 |
| C | -0.91012600 | -0.02086600 | -1.04778000 |
| C | -0.15951000 | 0.35343600  | -2.16647100 |
| H | 0.02332500  | 1.79643300  | -3.76018200 |
| H | -2.00590600 | 3.06722800  | -3.06144000 |
| H | -3.37514800 | 2.27724600  | -1.17160500 |
| H | 0.71342300  | -0.21696600 | -2.47377600 |
| C | -2.98431700 | 0.00660900  | 0.45870900  |
| C | -4.46908600 | -0.00678000 | -0.01495300 |
| C | -5.02290400 | -1.17754700 | -0.54254600 |
| C | -5.28357200 | 1.13377200  | 0.06985100  |
| C | -6.34132500 | -1.20246200 | -1.00262600 |
| H | -4.41748900 | -2.07359600 | -0.57148800 |
| C | -6.60322300 | 1.11001000  | -0.38420300 |
| H | -4.87984700 | 2.03028500  | 0.52903500  |
| C | -7.13706600 | -0.05855900 | -0.93066700 |
| H | -6.74948100 | -2.12385000 | -1.41034800 |
| H | -7.21675600 | 2.00381100  | -0.30223500 |
| H | -8.16439900 | -0.07997200 | -1.28447900 |
| N | -2.92618700 | 0.94022500  | 1.63599500  |
| C | -1.59592000 | 1.36452700  | 2.04036200  |
| H | -1.07829300 | 1.85657600  | 1.21420900  |
| H | -1.69405600 | 2.09153200  | 2.85555500  |
| H | -0.95836500 | 0.53906000  | 2.40737300  |
| C | -3.62308200 | 0.37691800  | 2.79662700  |
| H | -4.62520300 | 0.05158700  | 2.51406600  |
| H | -3.09460900 | -0.48525100 | 3.23185200  |
| H | -3.71890600 | 1.15417900  | 3.56398500  |
| O | -2.55273600 | -1.26262500 | 0.76873000  |
| O | 1.26806400  | -3.67784800 | 1.97642800  |

|            |             |             |             |
|------------|-------------|-------------|-------------|
| C          | 0.77060700  | -2.82975700 | 1.39772000  |
| H          | 2.45238200  | 0.50111400  | 3.29528200  |
| C          | -1.53199400 | -2.30960900 | -0.71283600 |
| O          | -2.36647600 | -2.85410200 | -1.29068200 |
| <b>TS5</b> |             |             |             |
| Pd         | 0.35801400  | 1.58487900  | -0.61088400 |
| O          | -2.05111700 | 1.46284100  | 0.44374300  |
| C          | -2.93057000 | 1.07097000  | 1.18850500  |
| O          | -3.87379100 | 1.89498300  | 1.67691300  |
| C          | -3.09192200 | -0.36644200 | 1.68898700  |
| H          | -4.12869900 | -0.48301700 | 2.01424500  |
| N          | -2.82401600 | -1.31100500 | 0.61999500  |
| C          | -3.60213900 | -1.44480700 | -0.50648600 |
| O          | -3.25688900 | -2.09427400 | -1.48104700 |
| O          | -4.76991300 | -0.78132900 | -0.35577500 |
| C          | -5.80074800 | -0.79690600 | -1.41159000 |
| C          | -6.28272100 | -2.23124600 | -1.64857300 |
| H          | -7.12434000 | -2.22300000 | -2.34865800 |
| H          | -5.48526100 | -2.84799000 | -2.06359900 |
| H          | -6.62659600 | -2.67766900 | -0.71011000 |
| C          | -6.91084100 | 0.05999500  | -0.79845300 |
| H          | -7.28582800 | -0.39268900 | 0.12416500  |
| H          | -6.53845500 | 1.06129200  | -0.56317200 |
| H          | -7.74355100 | 0.15445100  | -1.50147600 |
| C          | -5.24886100 | -0.14894500 | -2.68513500 |
| H          | -4.87854700 | 0.85868600  | -2.47078200 |
| H          | -4.43656800 | -0.74230600 | -3.10507300 |
| H          | -6.04744400 | -0.06598200 | -3.42926300 |
| C          | -2.14621100 | -0.64324700 | 2.89086400  |
| H          | -1.11925500 | -0.58106400 | 2.50289900  |
| C          | -2.30021800 | 0.40372700  | 4.00414400  |
| H          | -2.03758800 | 1.41237200  | 3.67220400  |
| H          | -3.32888300 | 0.43221700  | 4.38024700  |
| H          | -1.64457800 | 0.15280800  | 4.84335200  |
| C          | -2.38072100 | -2.05772900 | 3.44135200  |
| H          | -2.27737500 | -2.82029800 | 2.66622300  |
| H          | -1.66138700 | -2.27789500 | 4.23628400  |
| H          | -3.38714400 | -2.14470400 | 3.86734000  |
| H          | -1.85894200 | -1.57553300 | 0.46013300  |
| C          | 0.10044500  | -2.63298000 | -0.83652200 |
| C          | 1.13215400  | -3.10972600 | -0.02016300 |
| C          | 2.15404300  | -2.25438900 | 0.38897100  |
| C          | 2.12844000  | -0.90360900 | 0.01750500  |
| C          | 1.05681400  | -0.40118100 | -0.72487300 |

|            |             |             |             |
|------------|-------------|-------------|-------------|
| C          | 0.07186600  | -1.28445100 | -1.20234600 |
| H          | -0.68477700 | -3.29480700 | -1.19027700 |
| H          | 1.16154500  | -4.15766700 | 0.26472700  |
| H          | 2.98688300  | -2.64441700 | 0.96423200  |
| H          | -0.73668700 | -0.93132100 | -1.83510300 |
| C          | 3.31836200  | 0.03148900  | 0.29821900  |
| C          | 4.63209200  | -0.66770100 | -0.10633500 |
| C          | 5.08430600  | -0.63202800 | -1.43181700 |
| C          | 5.35530500  | -1.40976500 | 0.83745800  |
| C          | 6.23560400  | -1.32820500 | -1.80189300 |
| H          | 4.54425900  | -0.04923300 | -2.16926000 |
| C          | 6.50855600  | -2.10227400 | 0.46456700  |
| H          | 5.01402600  | -1.42588700 | 1.86722100  |
| C          | 6.95210200  | -2.06583900 | -0.85784100 |
| H          | 6.57485700  | -1.28790200 | -2.83312700 |
| H          | 7.06072100  | -2.66694800 | 1.21084500  |
| H          | 7.84981600  | -2.60364200 | -1.14947800 |
| N          | 3.38675600  | 0.48301500  | 1.66541200  |
| C          | 2.12822900  | 0.81980200  | 2.32336600  |
| H          | 1.43640400  | -0.02298400 | 2.28263900  |
| H          | 2.34033800  | 1.03700900  | 3.37520100  |
| H          | 1.62827500  | 1.70095000  | 1.88473600  |
| C          | 4.39063500  | 1.52713600  | 1.89814400  |
| H          | 5.32994100  | 1.26454200  | 1.41074000  |
| H          | 4.06828800  | 2.50830600  | 1.51841500  |
| H          | 4.57176700  | 1.61222100  | 2.97446000  |
| O          | 3.20070400  | 1.17498600  | -0.63766500 |
| O          | -0.12769900 | 4.66185900  | -0.70688400 |
| C          | 0.01886600  | 3.52709100  | -0.65584900 |
| H          | -3.67966000 | 2.78469900  | 1.33370500  |
| C          | 2.15550200  | 1.24390600  | -1.50818500 |
| O          | 2.29950700  | 1.50756400  | -2.67152700 |
| <b>TS6</b> |             |             |             |
| Pd         | 0.50250500  | 1.30847600  | -0.93969100 |
| O          | -1.84374900 | 1.39544000  | -1.12834100 |
| C          | -2.82140800 | 1.54690900  | -0.41022000 |
| O          | -3.87291900 | 2.27145800  | -0.81245000 |
| C          | -2.99893700 | 0.97081800  | 0.99702700  |
| H          | -4.04993800 | 1.10618000  | 1.26434200  |
| N          | -2.69430900 | -0.44830900 | 1.00617000  |
| C          | -3.45685300 | -1.41634800 | 0.39469800  |
| O          | -3.12159300 | -2.58782100 | 0.32819500  |
| O          | -4.59649400 | -0.87677000 | -0.08848200 |
| C          | -5.60436000 | -1.70619500 | -0.77998100 |

|   |             |             |             |
|---|-------------|-------------|-------------|
| C | -6.14925900 | -2.76910400 | 0.17821500  |
| H | -6.97591800 | -3.30316900 | -0.30124600 |
| H | -5.37466500 | -3.48773800 | 0.44659200  |
| H | -6.53215600 | -2.29999300 | 1.09013000  |
| C | -6.68370100 | -0.68031100 | -1.13295100 |
| H | -7.10063200 | -0.22867500 | -0.22796800 |
| H | -6.26727400 | 0.11765600  | -1.75436400 |
| H | -7.49509300 | -1.16398300 | -1.68449600 |
| C | -4.99305500 | -2.31717600 | -2.04438300 |
| H | -4.57182100 | -1.53347700 | -2.68184700 |
| H | -4.20636100 | -3.02938100 | -1.79527700 |
| H | -5.77223700 | -2.83513800 | -2.61263600 |
| C | -2.11299400 | 1.72869900  | 2.02087600  |
| H | -1.06609900 | 1.52529600  | 1.75137000  |
| C | -2.33727700 | 3.24647400  | 1.94567500  |
| H | -2.06836300 | 3.66038700  | 0.96898100  |
| H | -3.38386900 | 3.50336900  | 2.14430500  |
| H | -1.72131000 | 3.75238500  | 2.69475500  |
| C | -2.36915700 | 1.21077100  | 3.44370000  |
| H | -2.21353700 | 0.13237400  | 3.52517600  |
| H | -1.69596700 | 1.70517300  | 4.15079000  |
| H | -3.39798600 | 1.42581900  | 3.75547100  |
| H | -1.75471700 | -0.74743600 | 1.23307300  |
| C | 0.44749500  | -2.97261400 | 1.89169900  |
| C | 1.57543700  | -2.57107500 | 2.61678800  |
| C | 2.43239800  | -1.59490000 | 2.10813100  |
| C | 2.16076800  | -0.98284400 | 0.88073300  |
| C | 1.02575000  | -1.38434800 | 0.16806300  |
| C | 0.17327900  | -2.38987400 | 0.65669800  |
| H | -0.21230900 | -3.74251200 | 2.28003500  |
| H | 1.79351200  | -3.02942400 | 3.57738800  |
| H | 3.31801900  | -1.30180800 | 2.66147500  |
| H | -0.69812200 | -2.69466800 | 0.08568700  |
| C | 3.09271600  | 0.03311000  | 0.18898600  |
| C | 4.33729800  | -0.78311500 | -0.27335100 |
| C | 5.40448900  | -1.03920200 | 0.59814700  |
| C | 4.37809900  | -1.31821100 | -1.56596300 |
| C | 6.48887400  | -1.81474600 | 0.18567000  |
| H | 5.38873800  | -0.60570500 | 1.59238400  |
| C | 5.46065900  | -2.09888600 | -1.97548400 |
| H | 3.56178700  | -1.10705600 | -2.24628500 |
| C | 6.51973000  | -2.35209200 | -1.10251900 |
| H | 7.31152800  | -1.99662500 | 0.87239800  |
| H | 5.47639700  | -2.50600800 | -2.98298400 |

|   |             |             |             |
|---|-------------|-------------|-------------|
| H | 7.36280600  | -2.95771800 | -1.42356500 |
| N | 3.53327100  | 1.05979400  | 1.15778000  |
| C | 2.48637300  | 1.70294600  | 1.94488700  |
| H | 1.87902200  | 0.96219900  | 2.46845800  |
| H | 2.96084100  | 2.34045300  | 2.69944000  |
| H | 1.81062600  | 2.34241300  | 1.34887800  |
| C | 4.38966400  | 2.07857100  | 0.54556100  |
| H | 5.18634500  | 1.60754900  | -0.03151100 |
| H | 3.83646900  | 2.75402200  | -0.12552500 |
| H | 4.84916400  | 2.67922800  | 1.33827600  |
| O | 2.48624700  | 0.53338800  | -0.96150100 |
| O | 1.03843200  | 4.41777500  | -1.40736500 |
| C | 0.70144300  | 3.35507200  | -1.15199900 |
| H | -3.66752600 | 2.60711400  | -1.70319700 |
| C | 0.68408100  | -0.69850200 | -1.09981100 |
| O | 0.29924600  | -1.15651500 | -2.13926900 |

#### 4. Reference

- (1) A. K. Verma; R. R. Jha; V. K. Sankar; T. Aggarwal; R. P. Singh and R. Chandra, *Eur. J. Org. Chem.*, 2011, **34**, 6998.
- (2) X. Wang; N. Li; Z. Li and H. Rao, *J. Org. Chem.*, 2017, **82**, 10158.
- (3) A. Gogoi; P. Sau; W. Ali; S. Guin and B. K. Patel, *Eur. J. Org. Chem.*, 2016, **7**, 1449.
- (4) L. Kong; Y. Sun; Z. Zheng; R. Tang; M. Wang and Y. Li, *Org. Lett.*, 2018, **20**, 5251.
- (5) L. Chu; X. -C. Wang; C. E. Moore; A. L. Rheingole and J. -Q. Yu, *J. Am. Chem. Soc.*, 2013, **135**, 16344.
- (6) T. Murai and F. Asai, *J. Am. Chem. Soc.*, 2009, **1129**, 780.
- (7) O. Tomashenko; V. Sokolov; A. Tomashevskiy; H. A. Buchholz; U. Welz-Biermann; V. Chaplinski and A. D. Meijer, *Eur. J. Org. Chem.*, 2008, 5107.
- (8) Heinz, C.; Lutz, J. P.; Simmons, E. M.; Miller, M. M.; Ewing, W. R.; Doyle, A. G. *J. Am. Chem. Soc.* **2018**, *140*, 2292.
- (9) T. Murai and K. Ui, and Narengerile, *J. Org. Chem.*, 2009, **74**, 5703.
- (10) G. L. Larson and J. L. Fry, *Organic Reactions* 2008, 1-737.

## 5. NMR Spectra

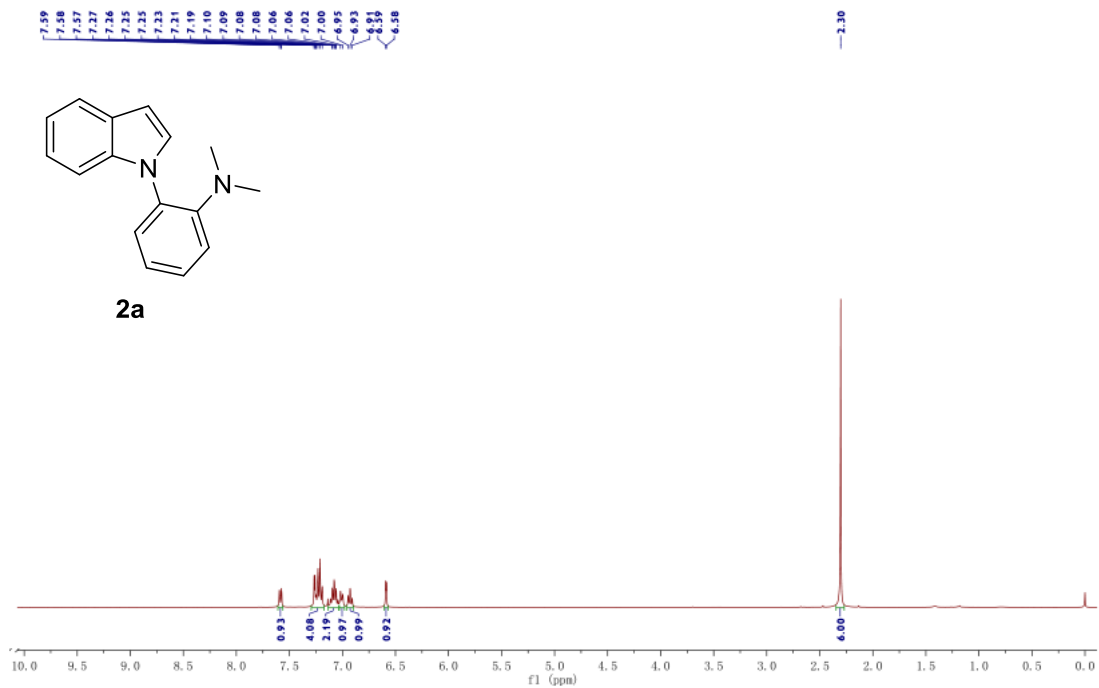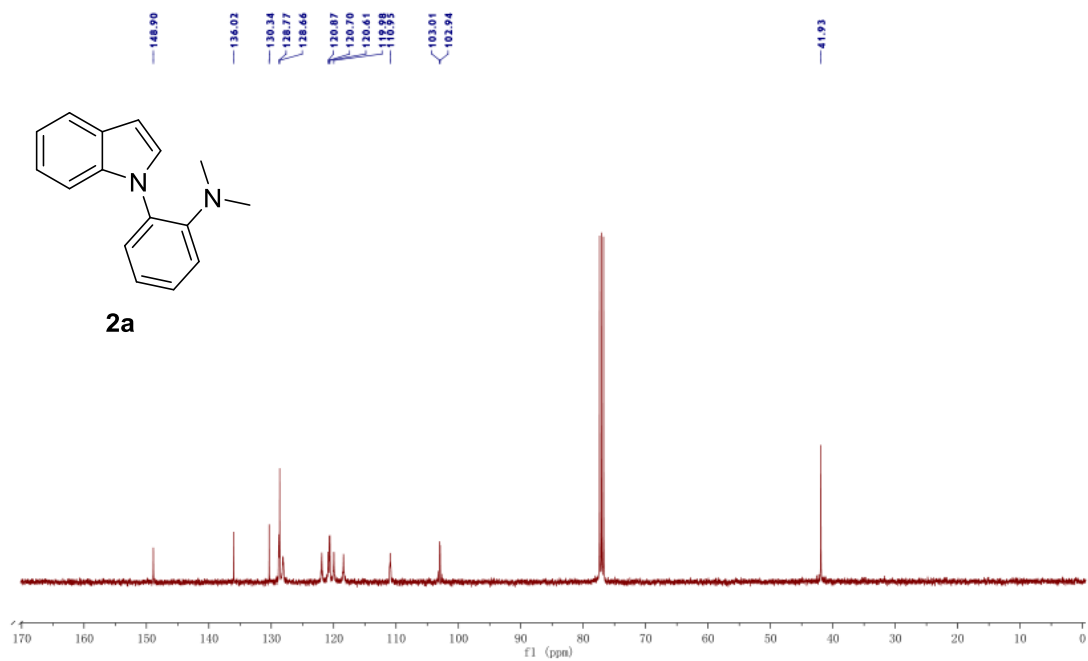

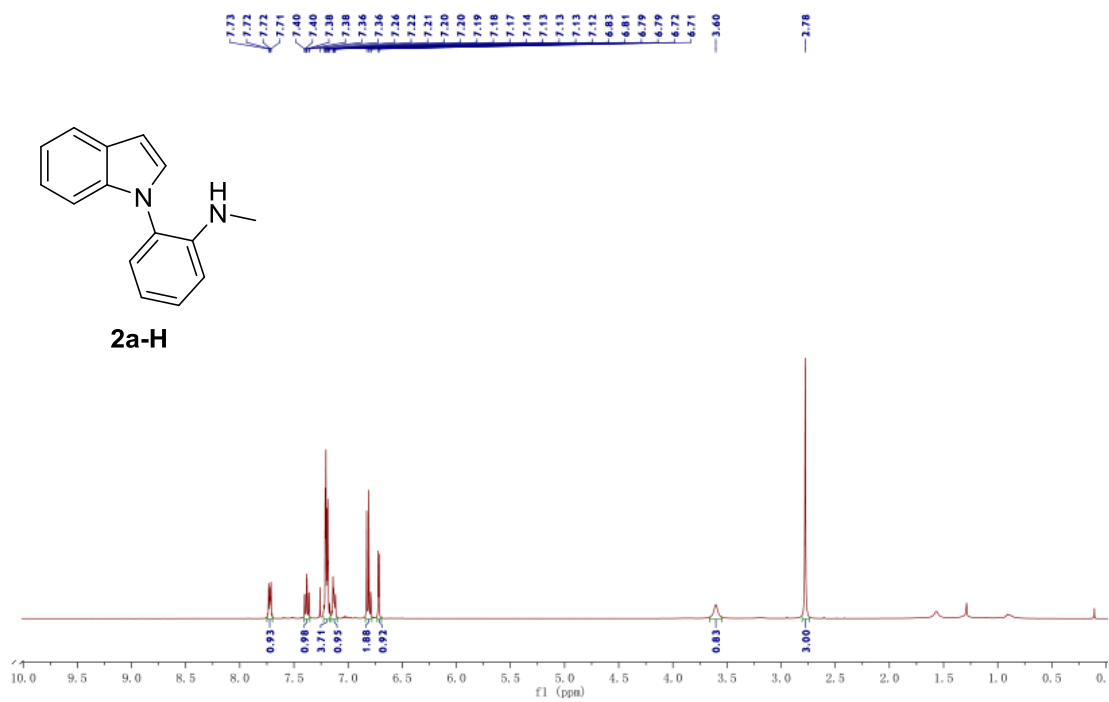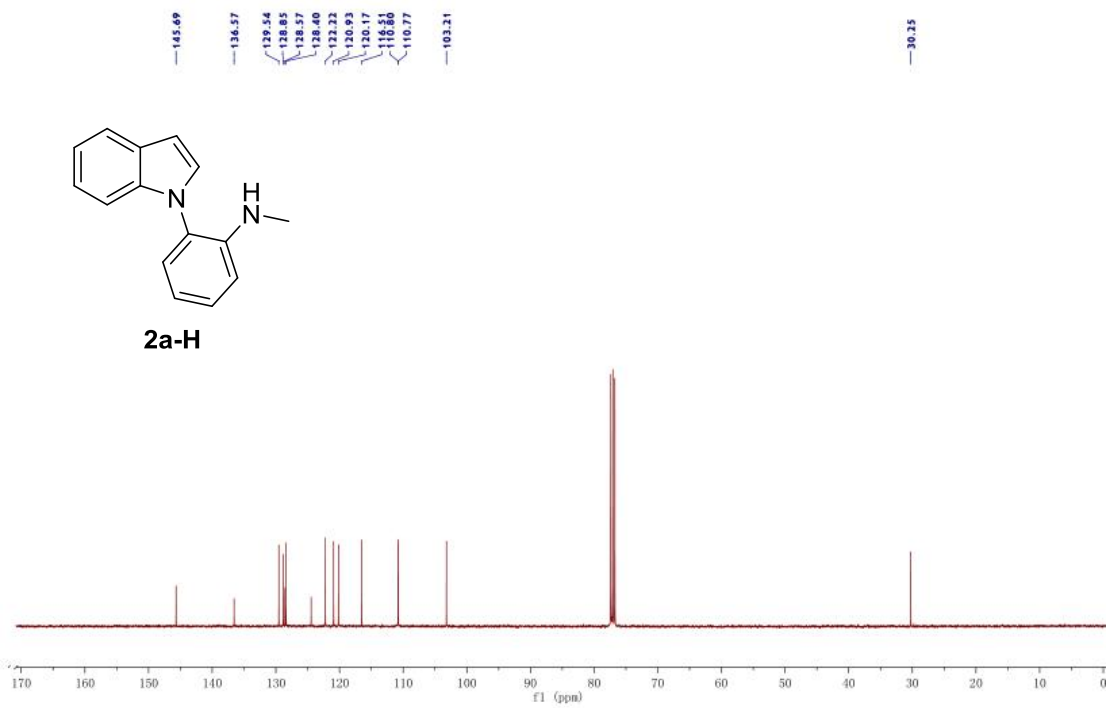



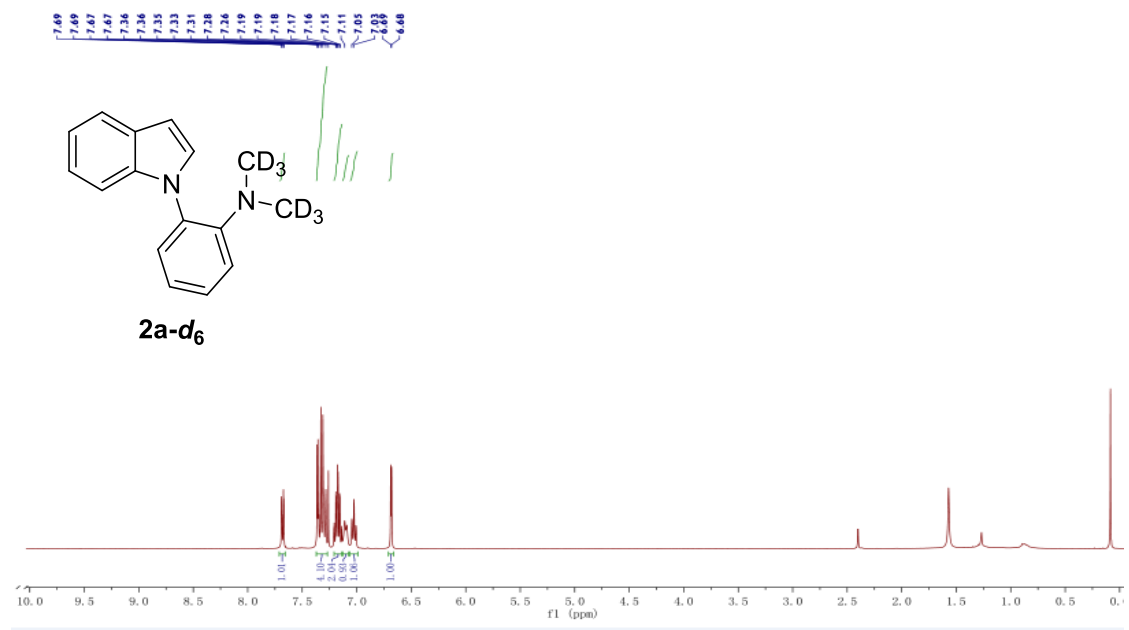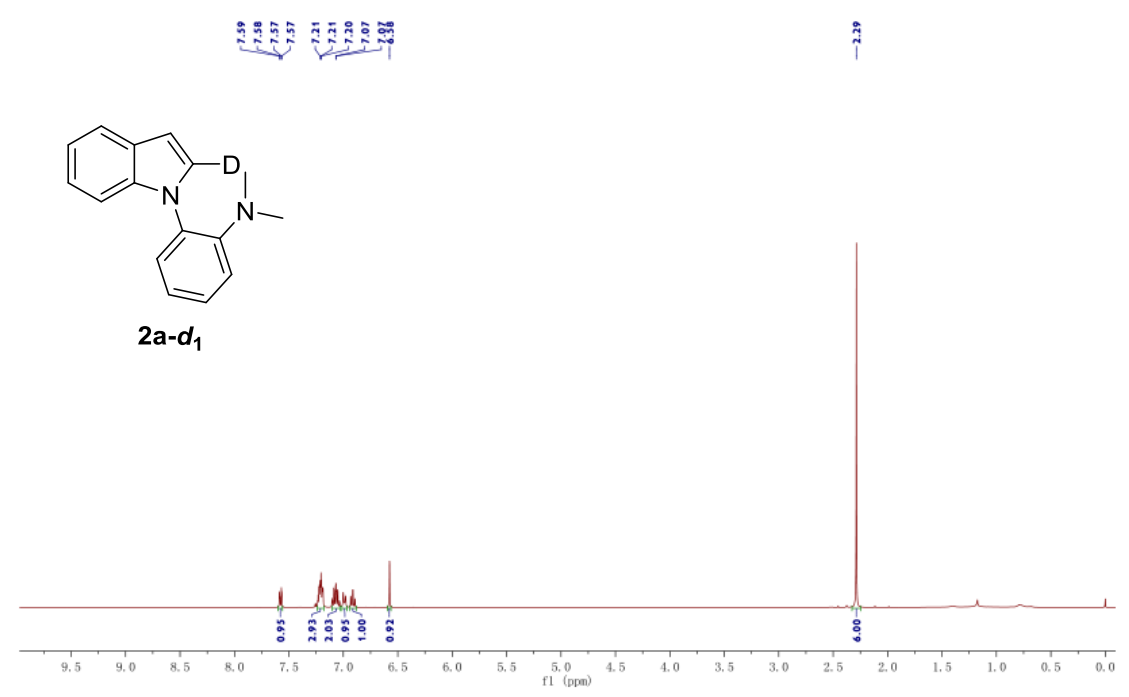

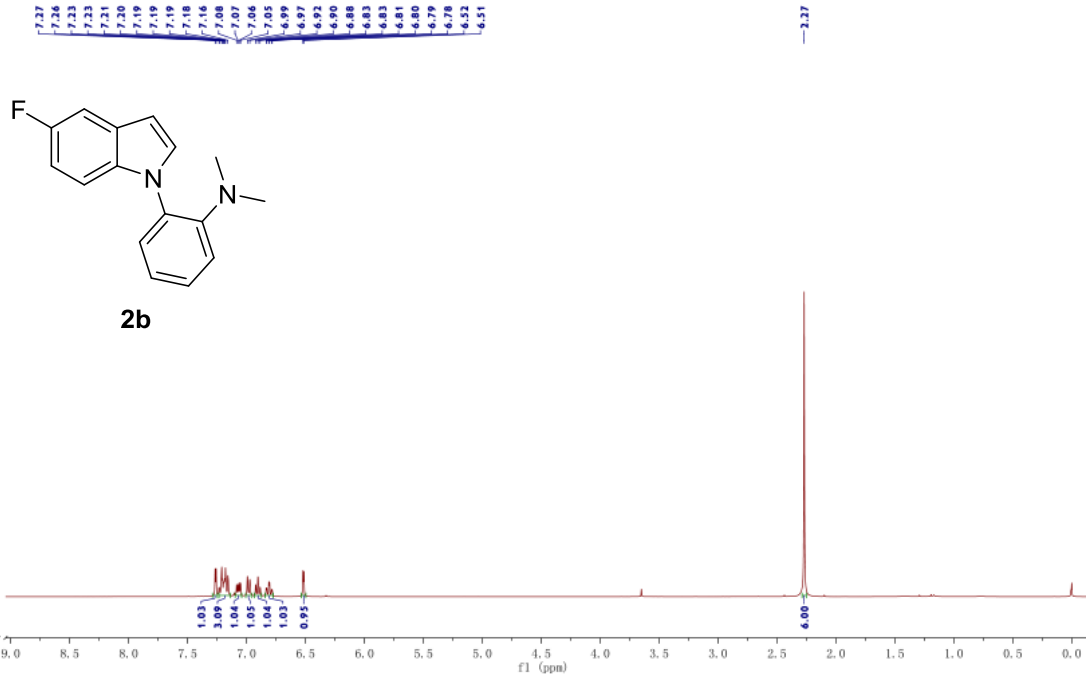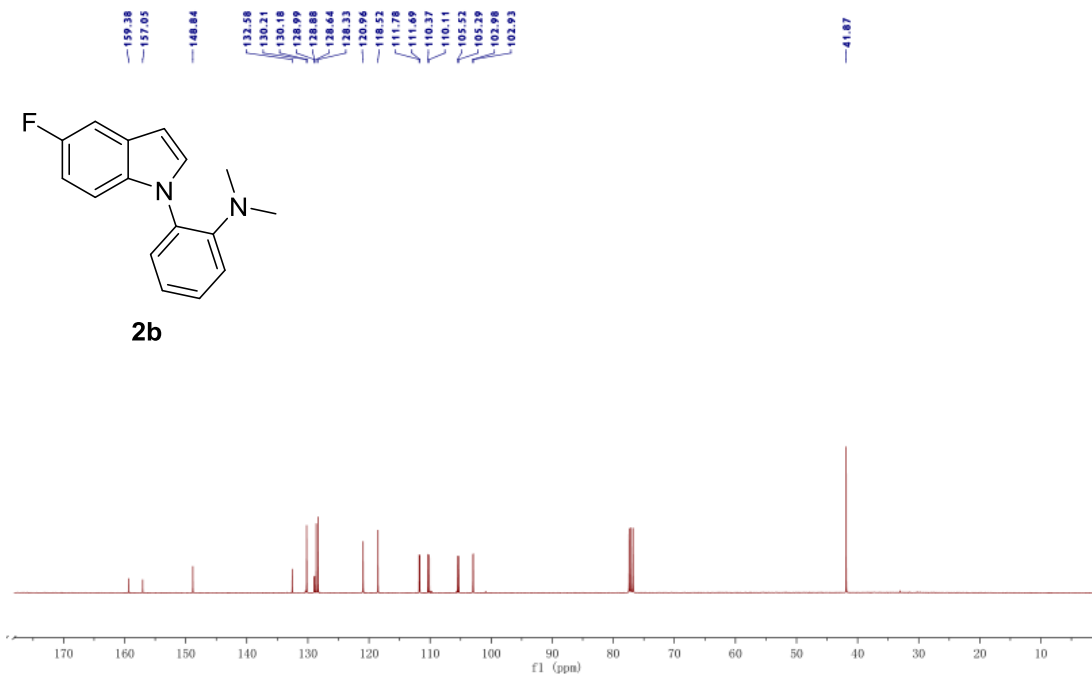

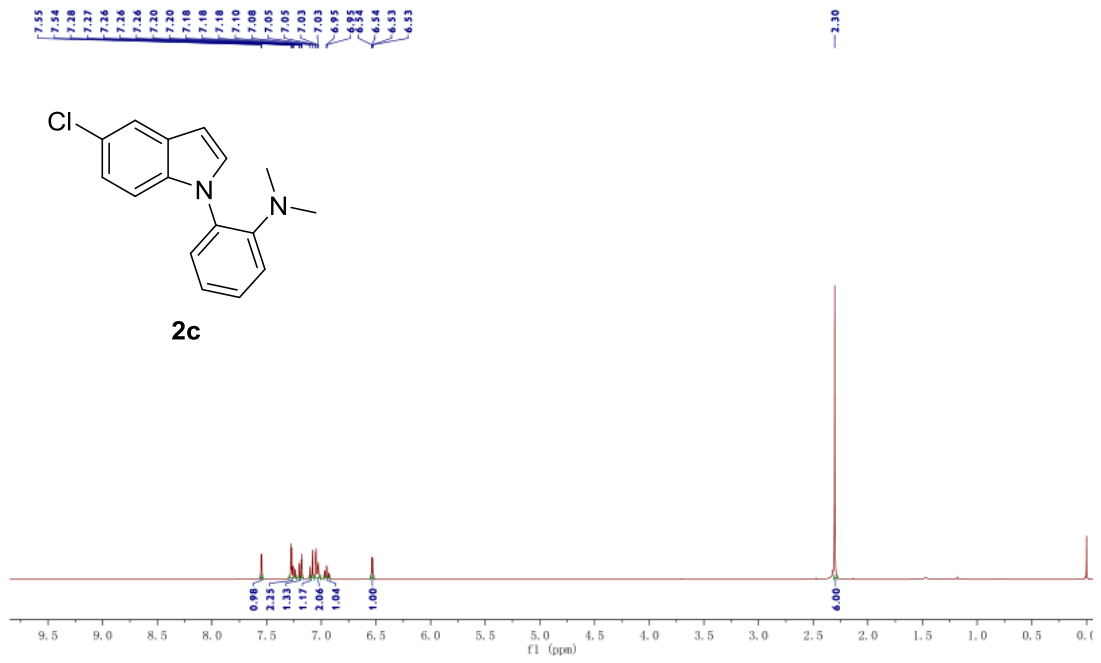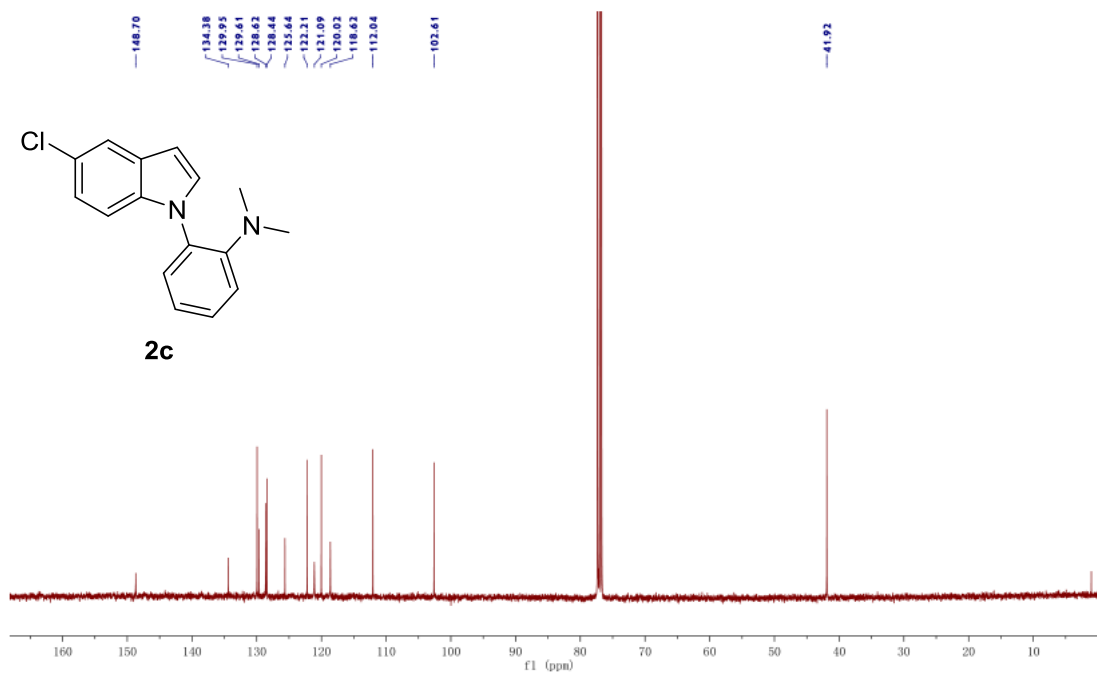

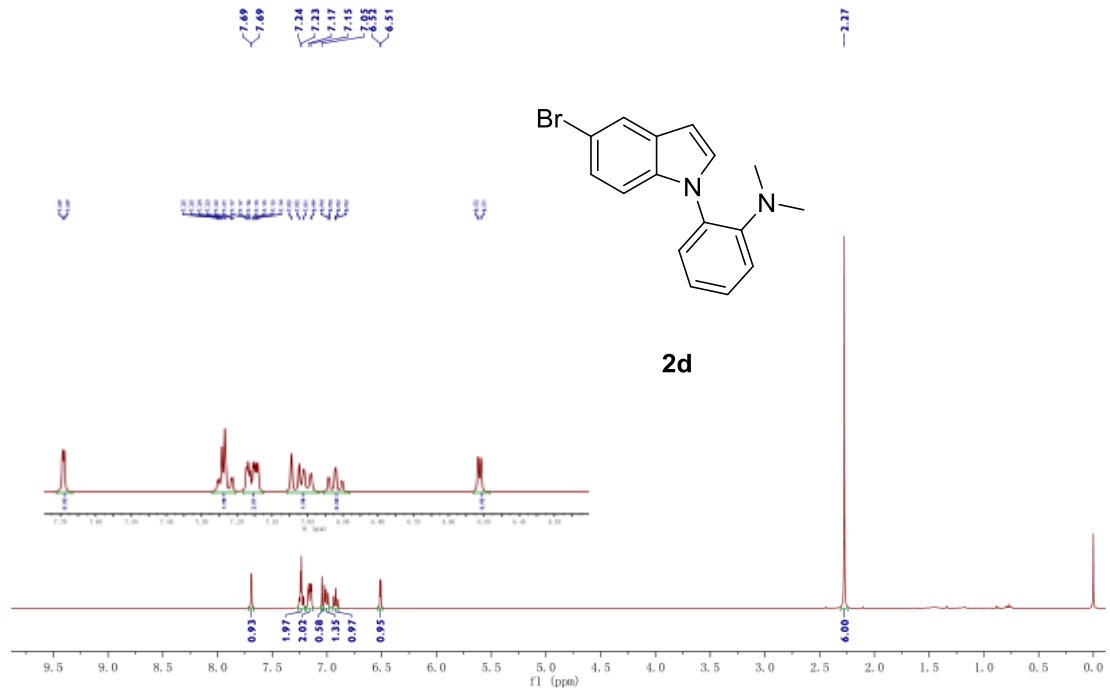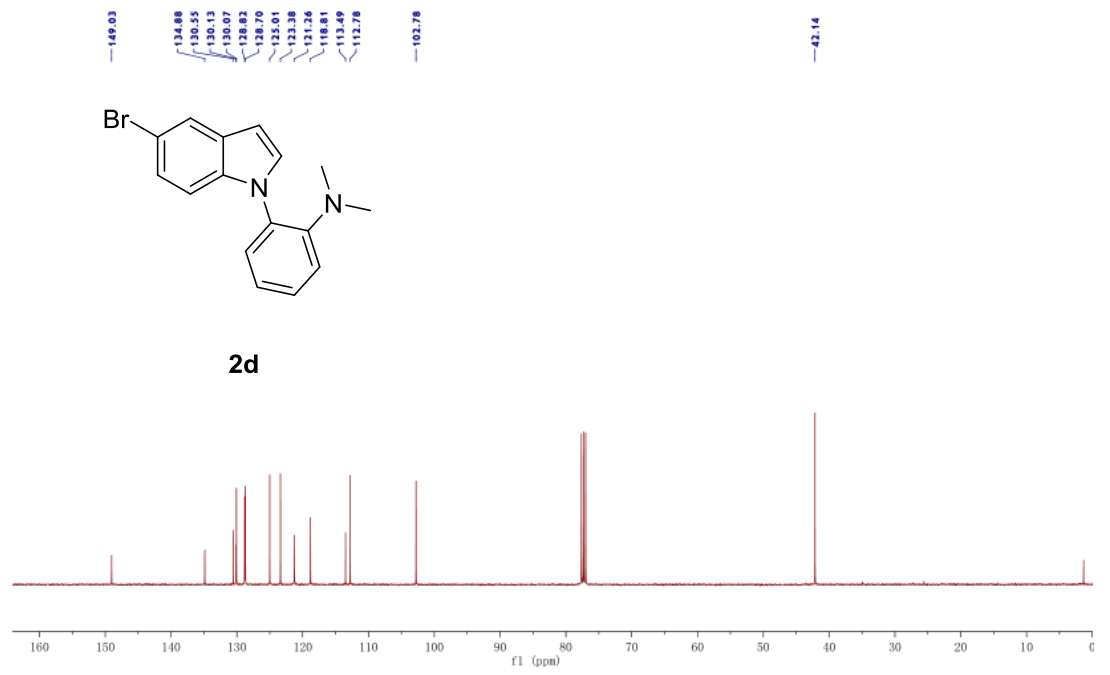

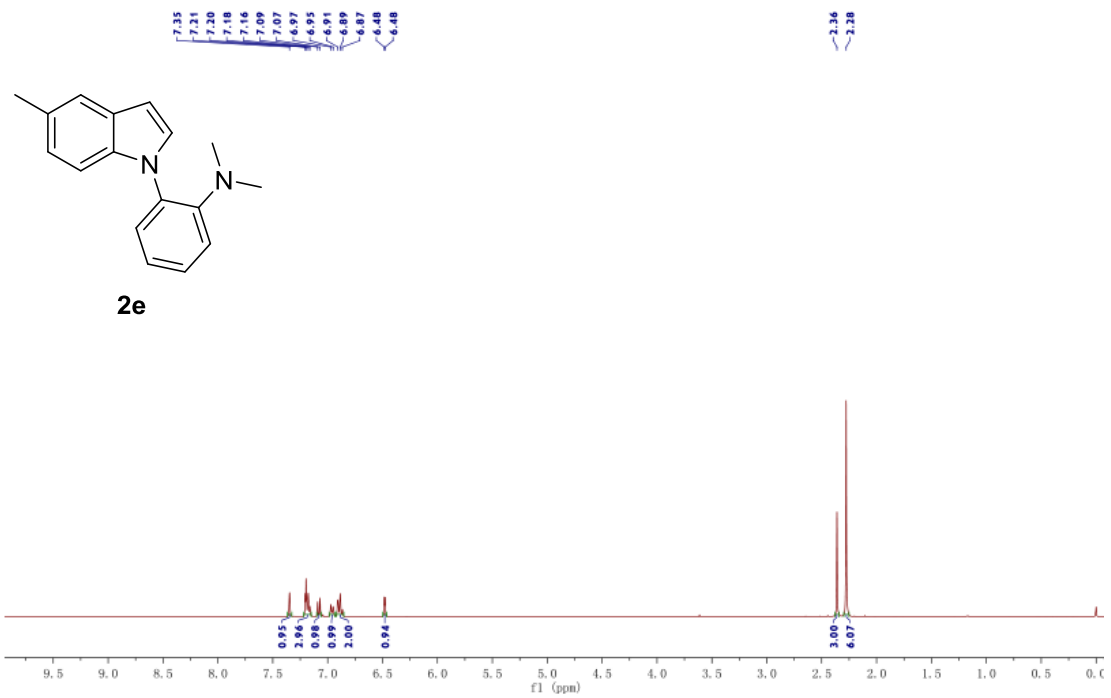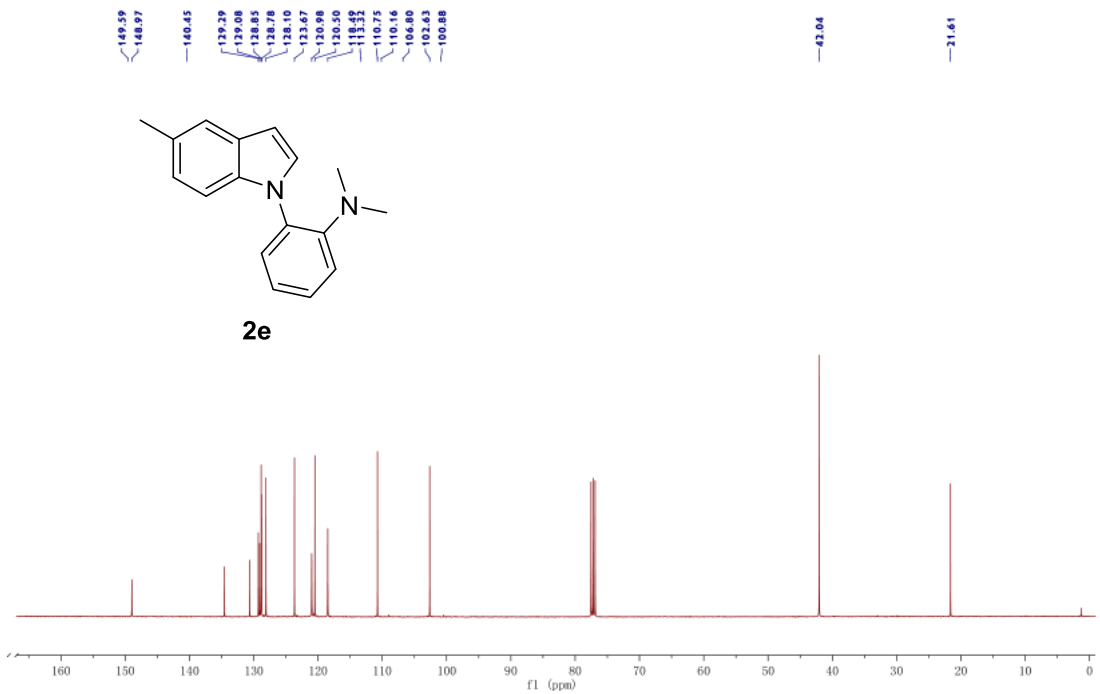

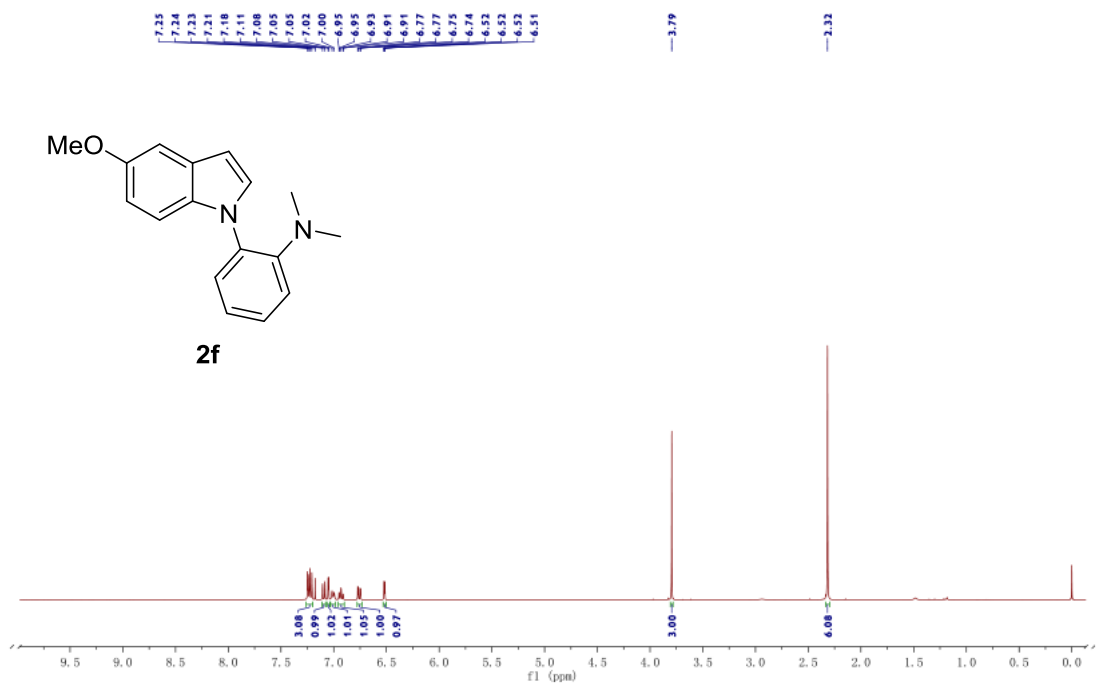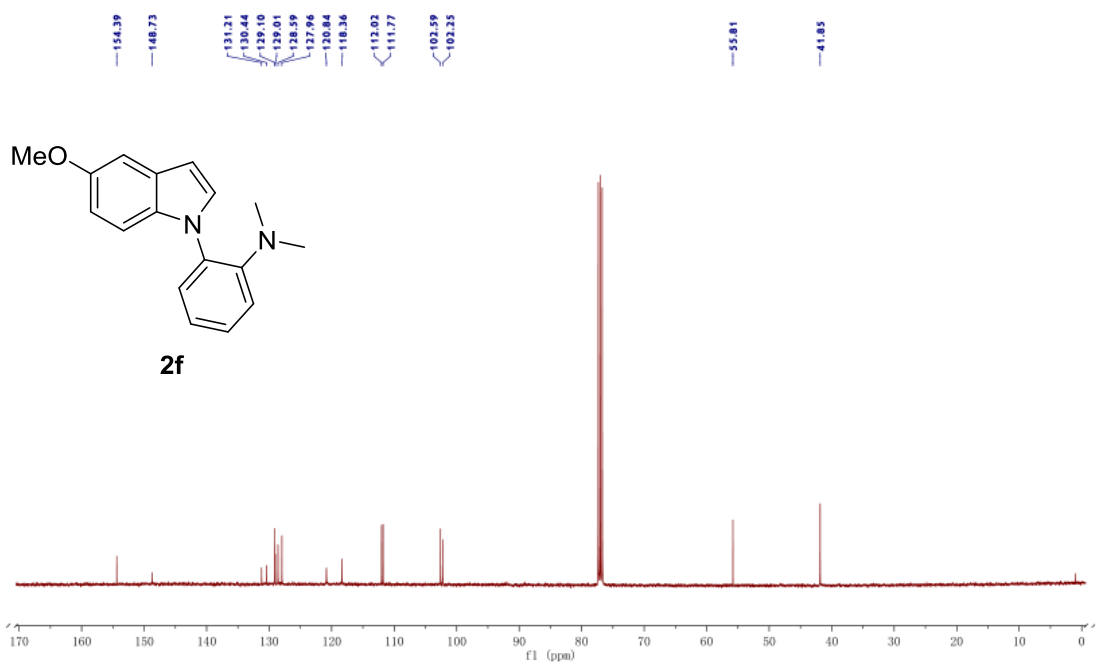

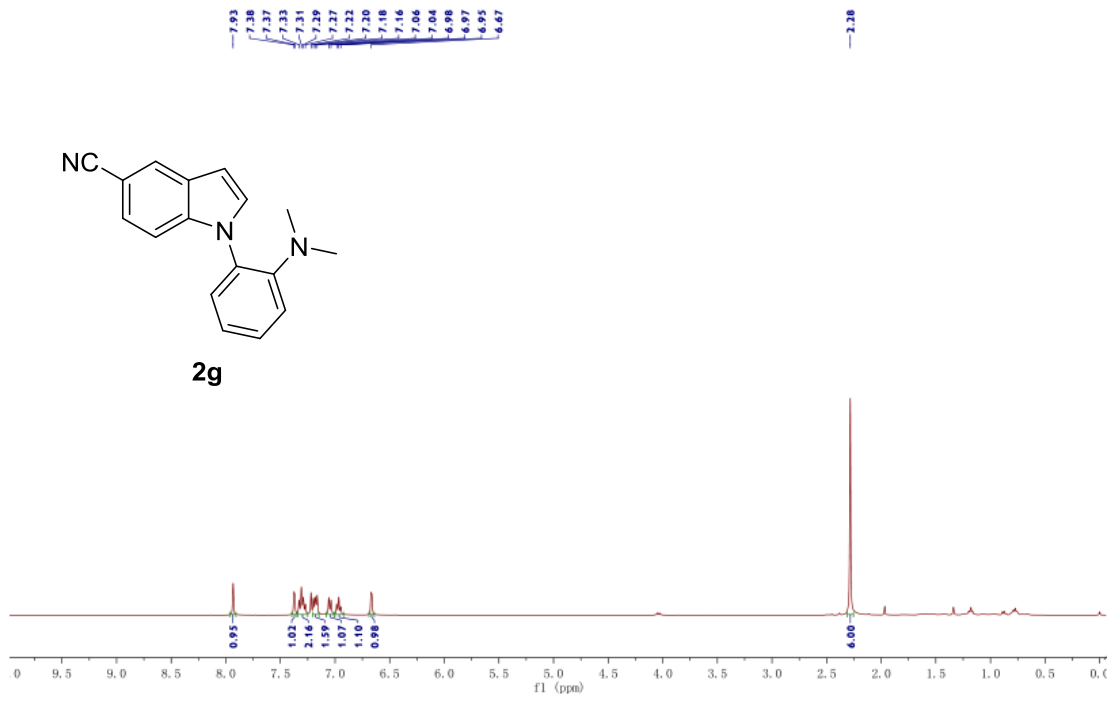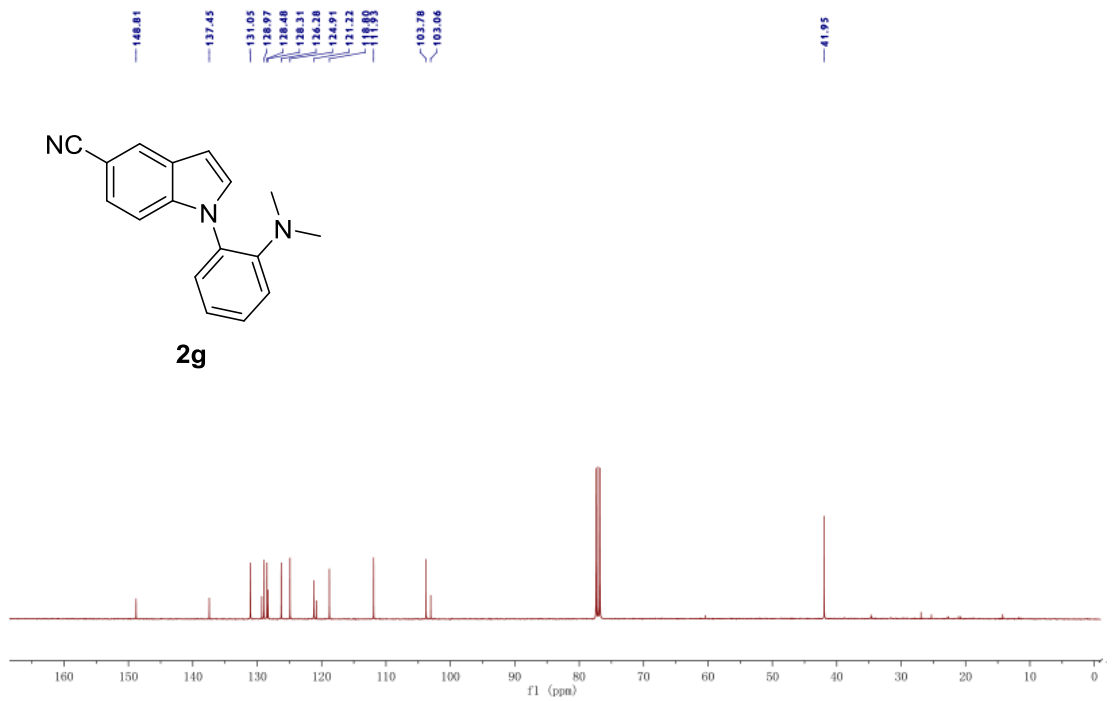

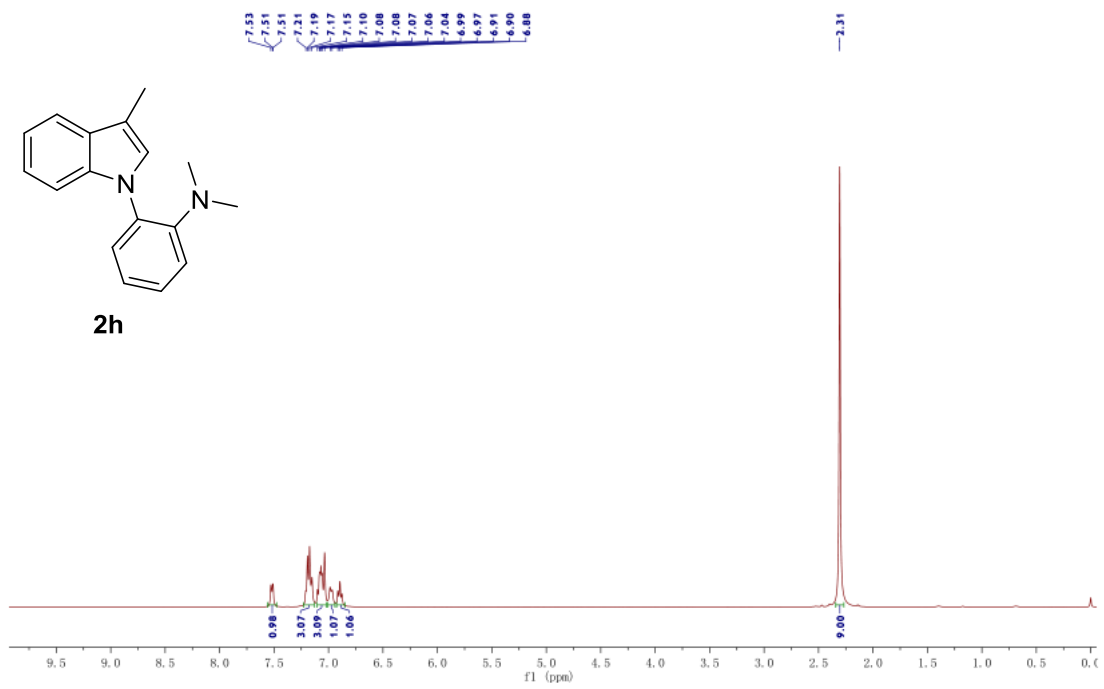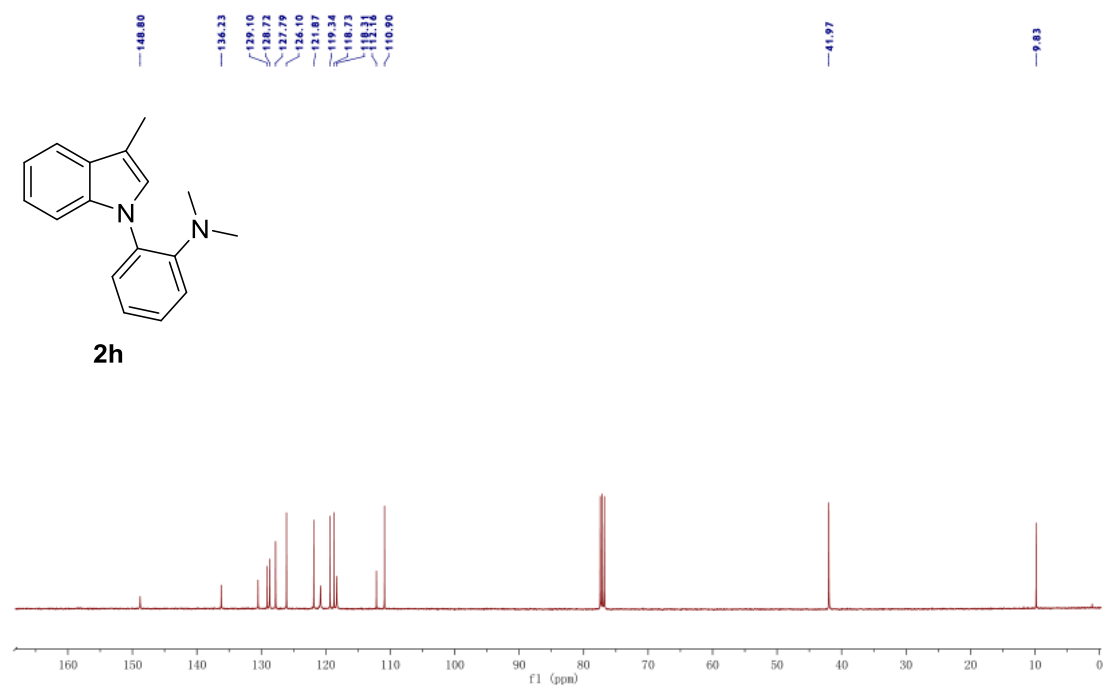



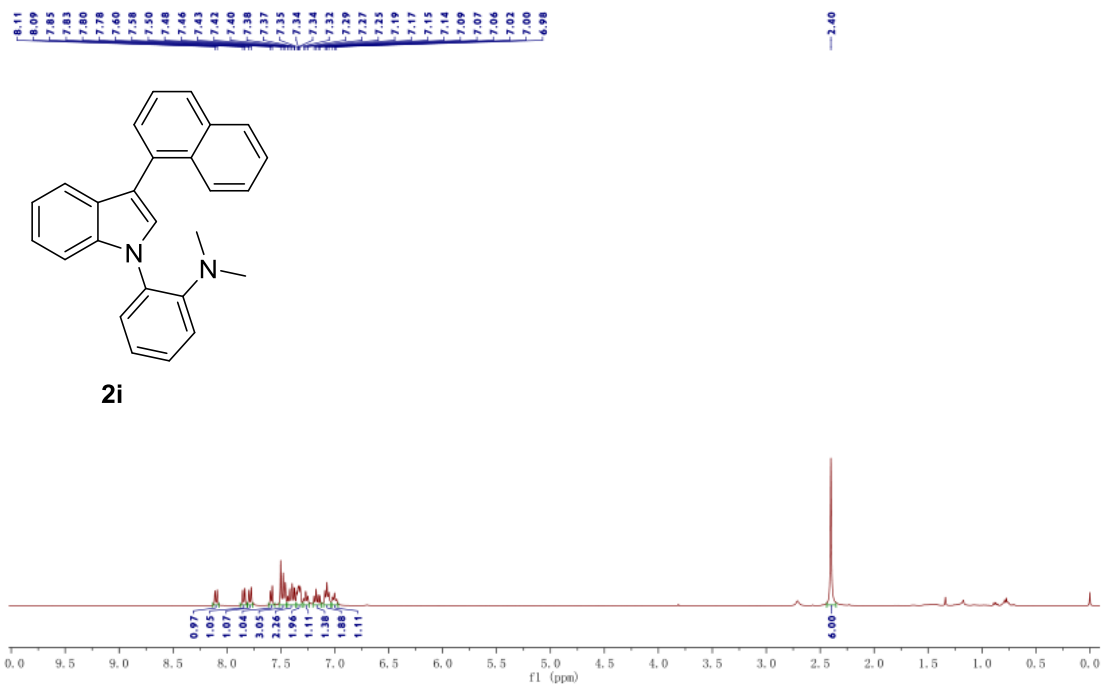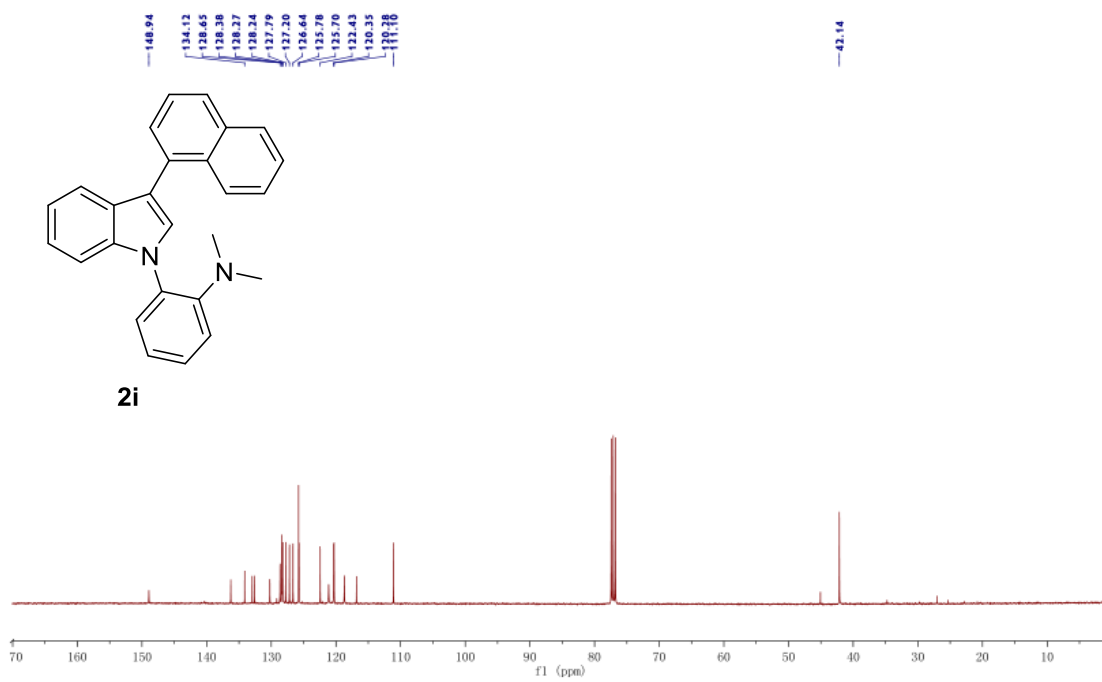

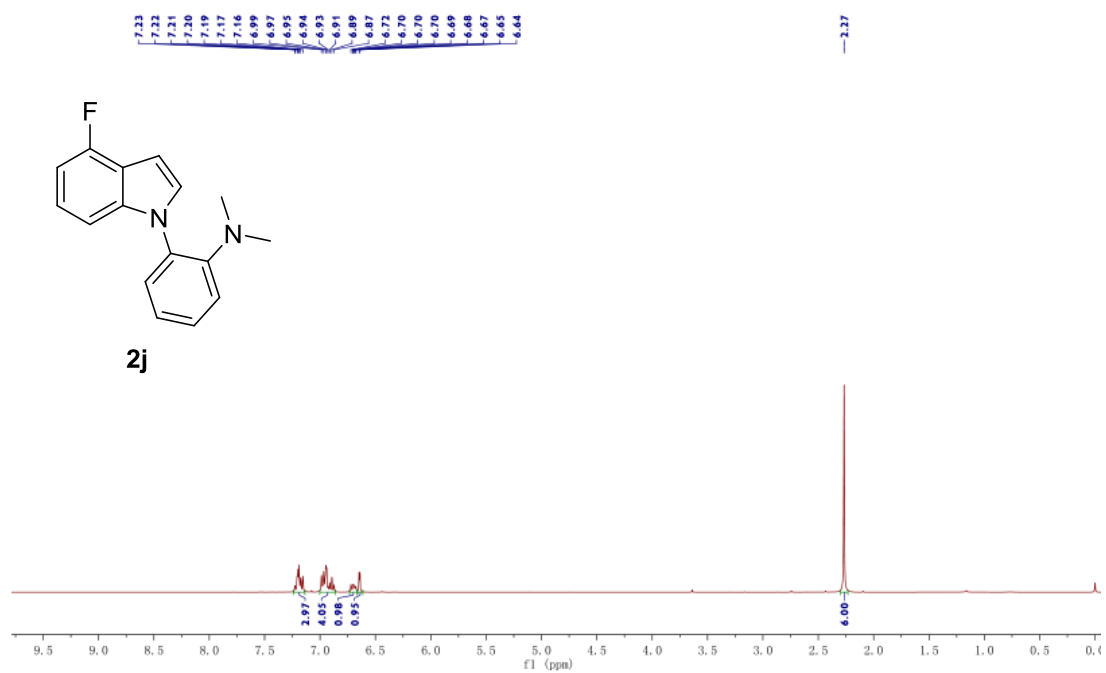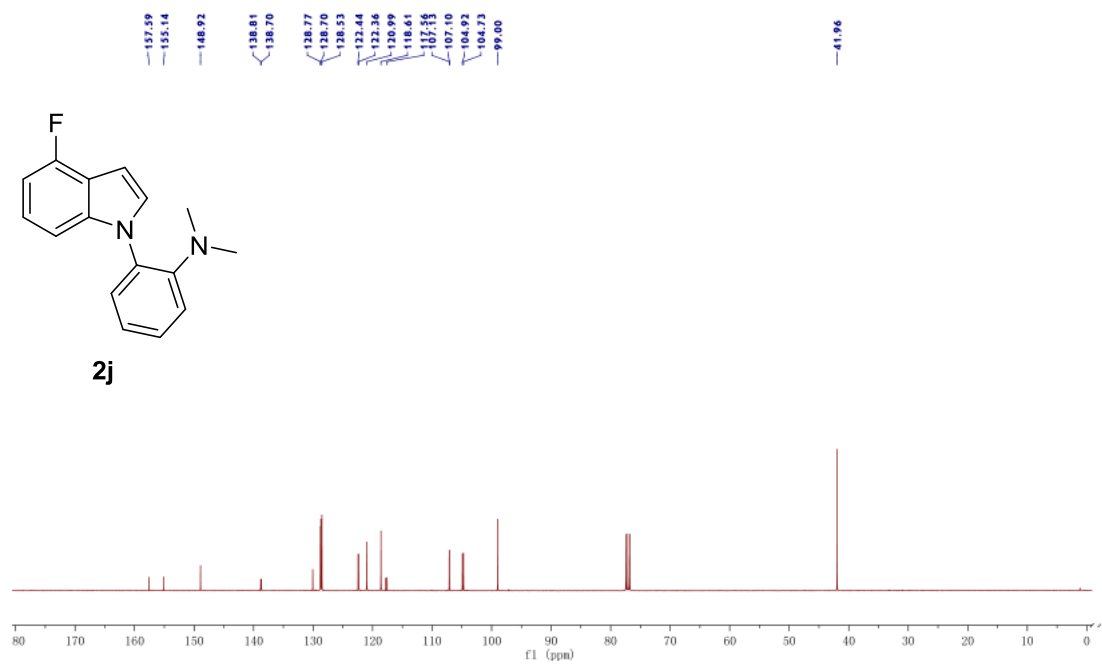

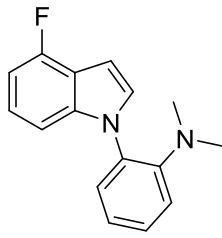

2j

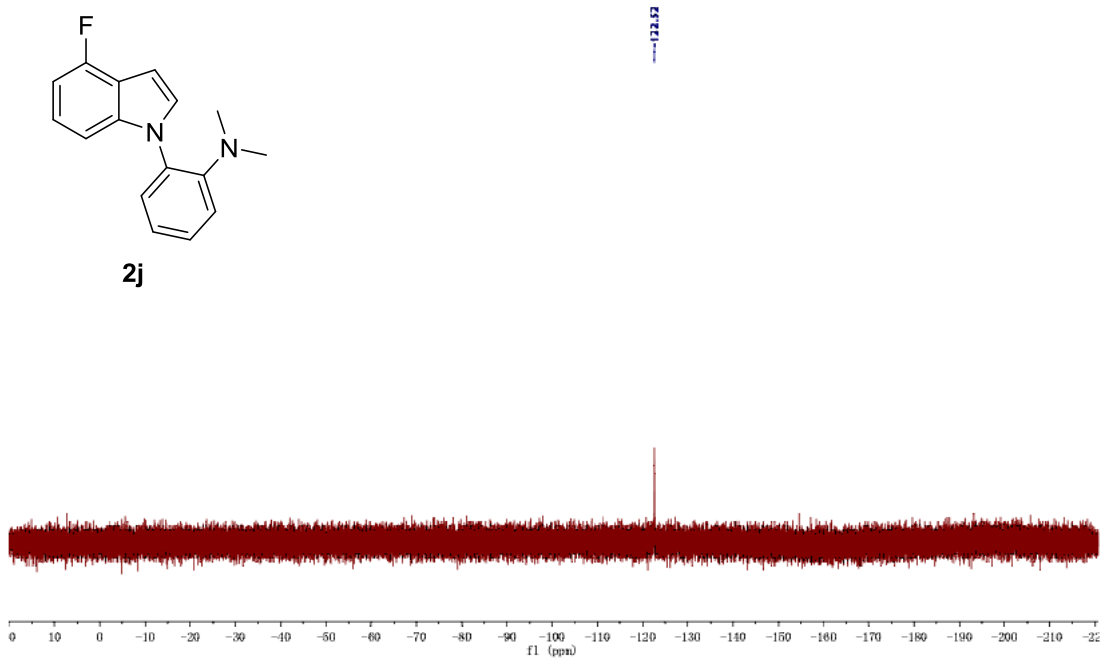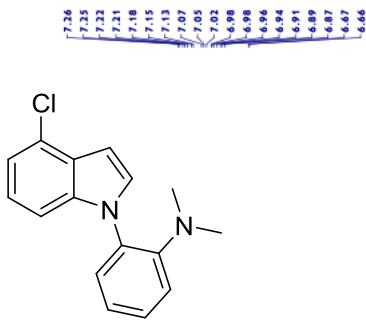

2k

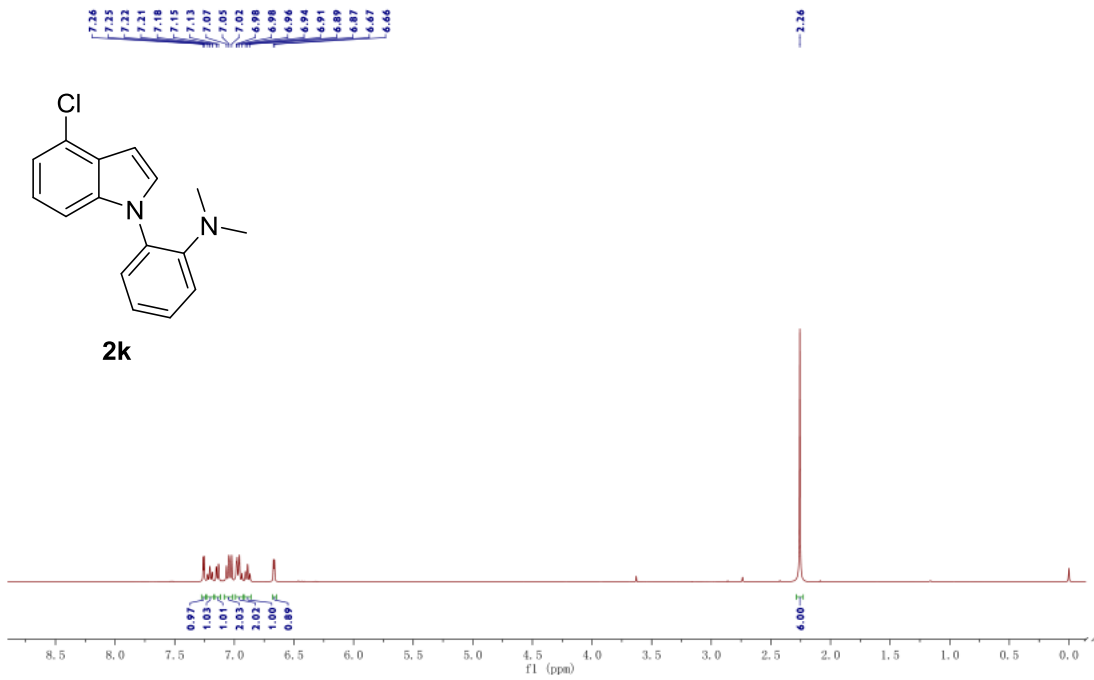

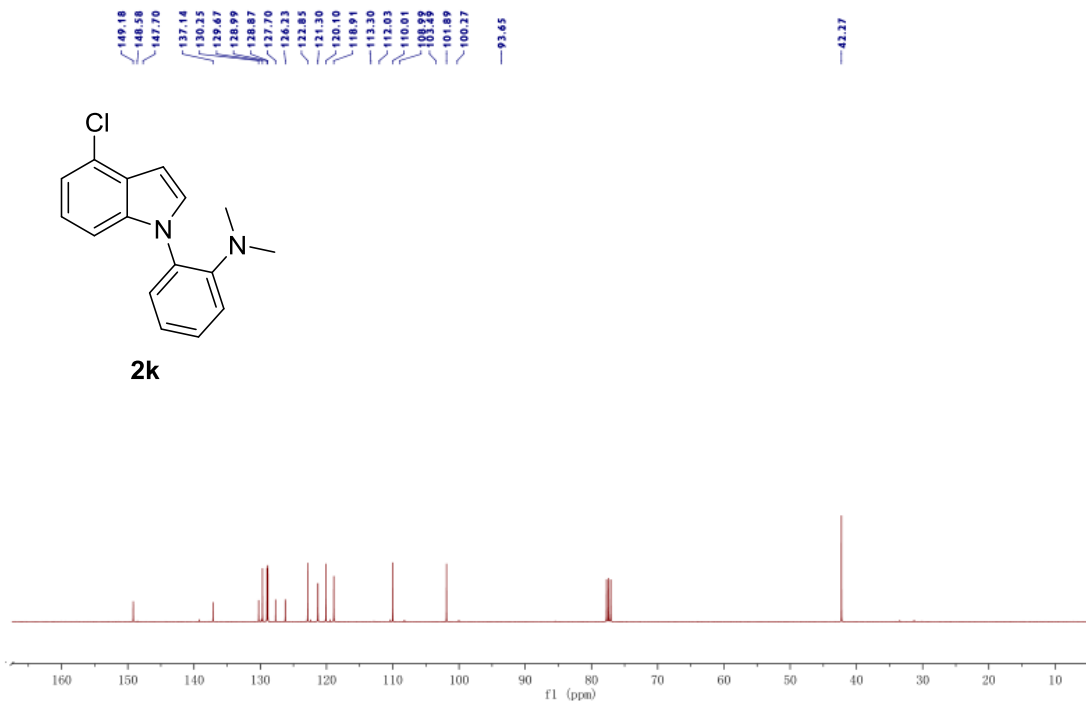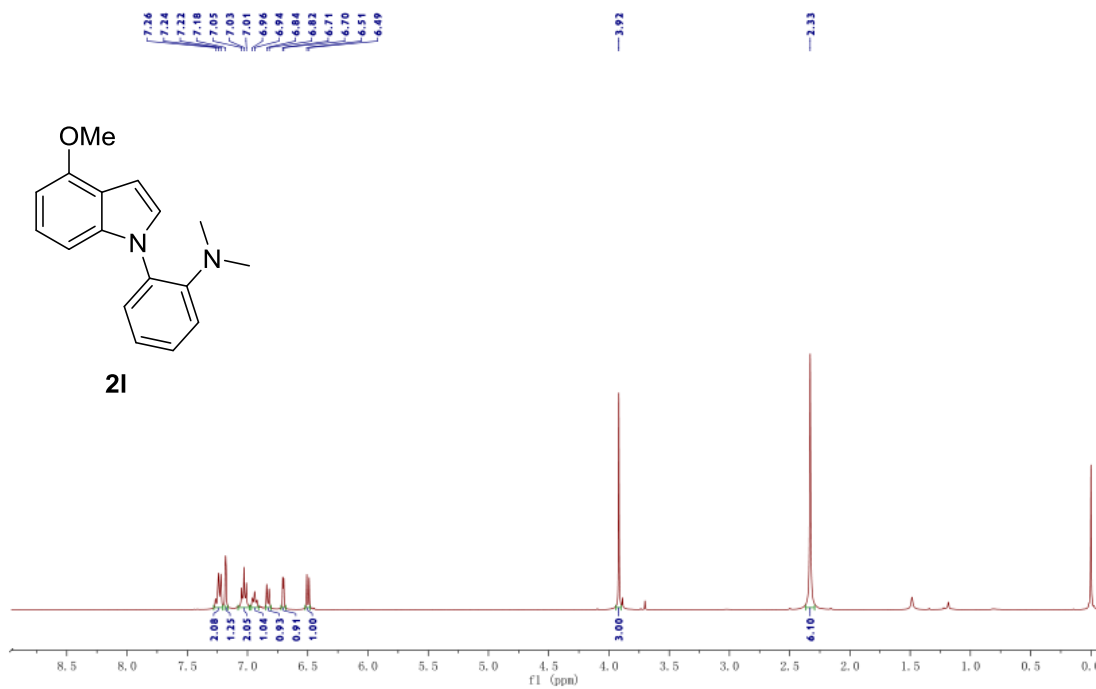

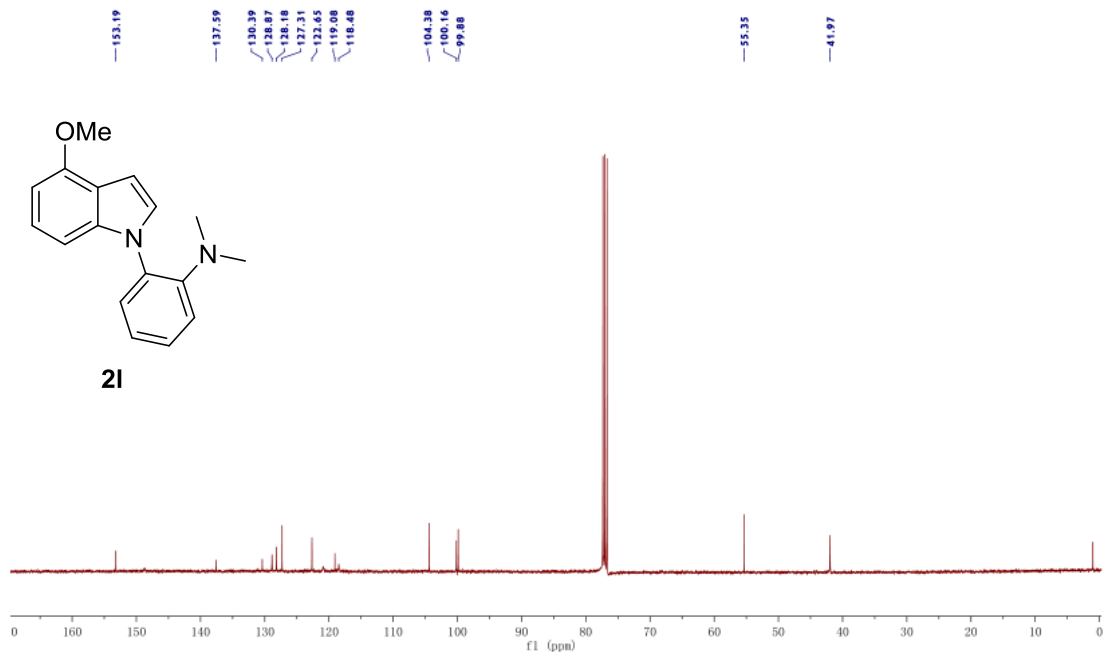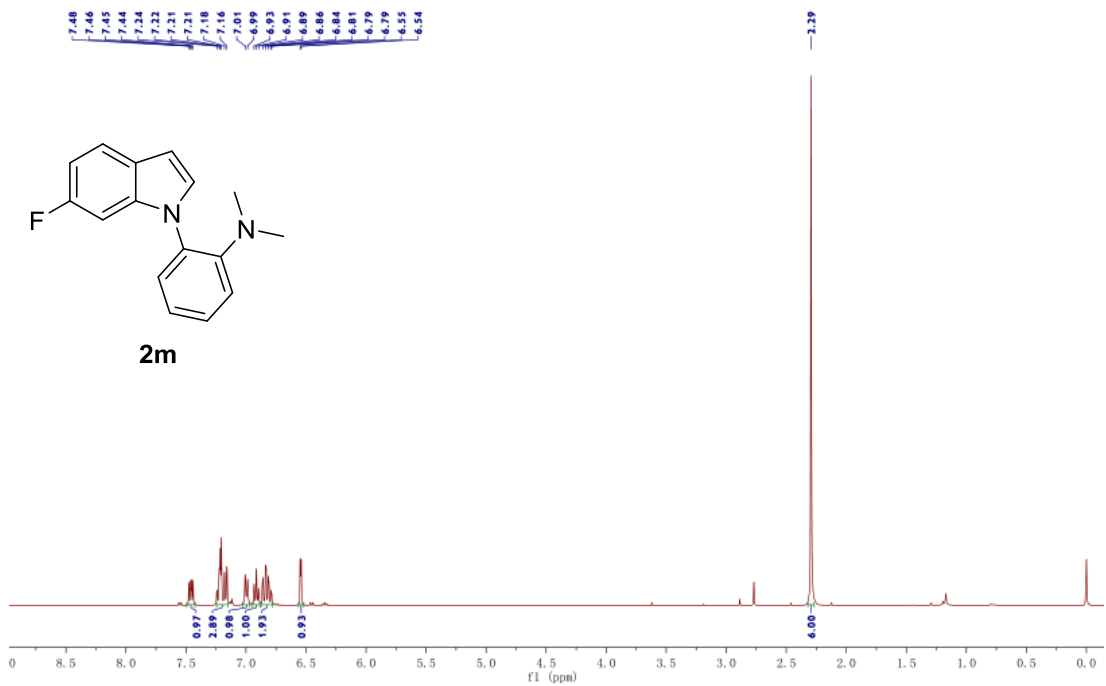

161.05  
158.70  
148.56  
148.04  
138.76  
135.99  
135.87  
128.96  
128.92  
128.37  
128.24  
121.15  
121.05  
119.39  
112.35  
109.88  
108.66  
108.41  
102.91  
97.44  
97.17  
84.97  
41.73

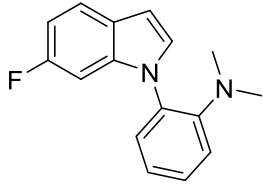

2m

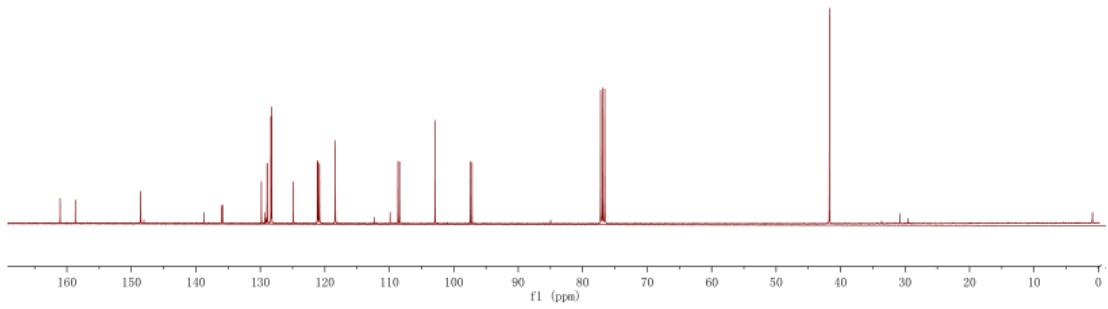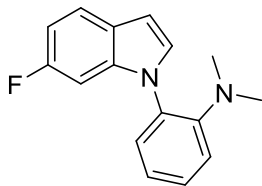

2m

126.89

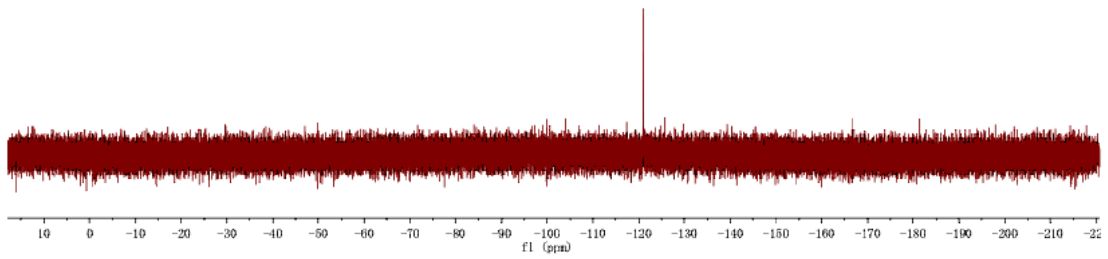

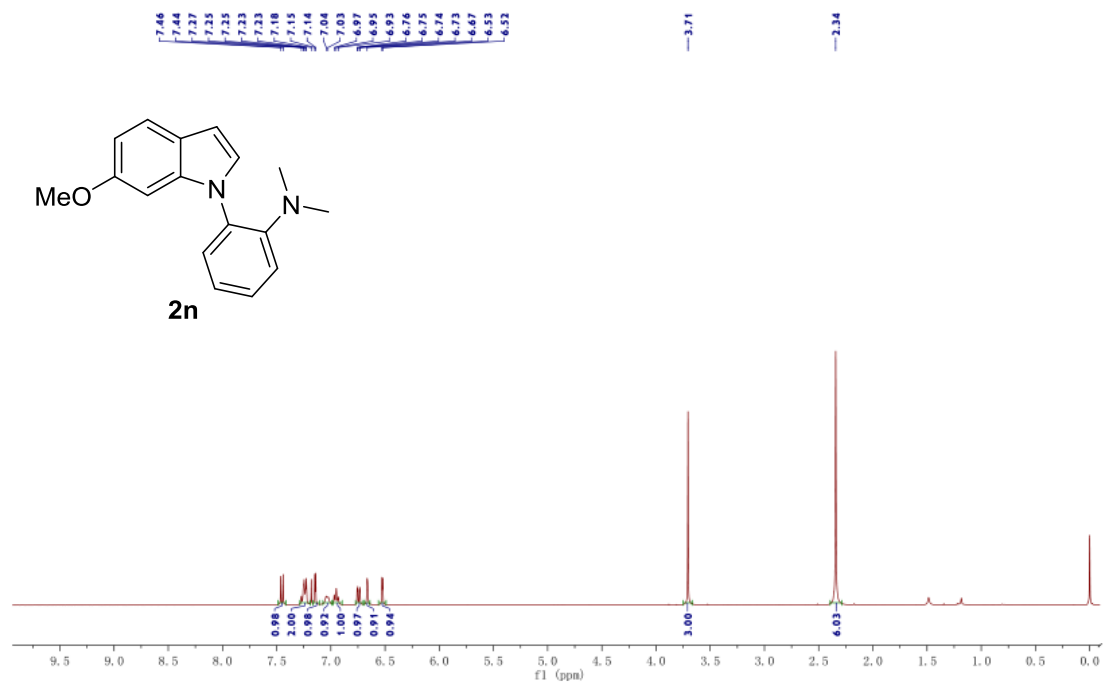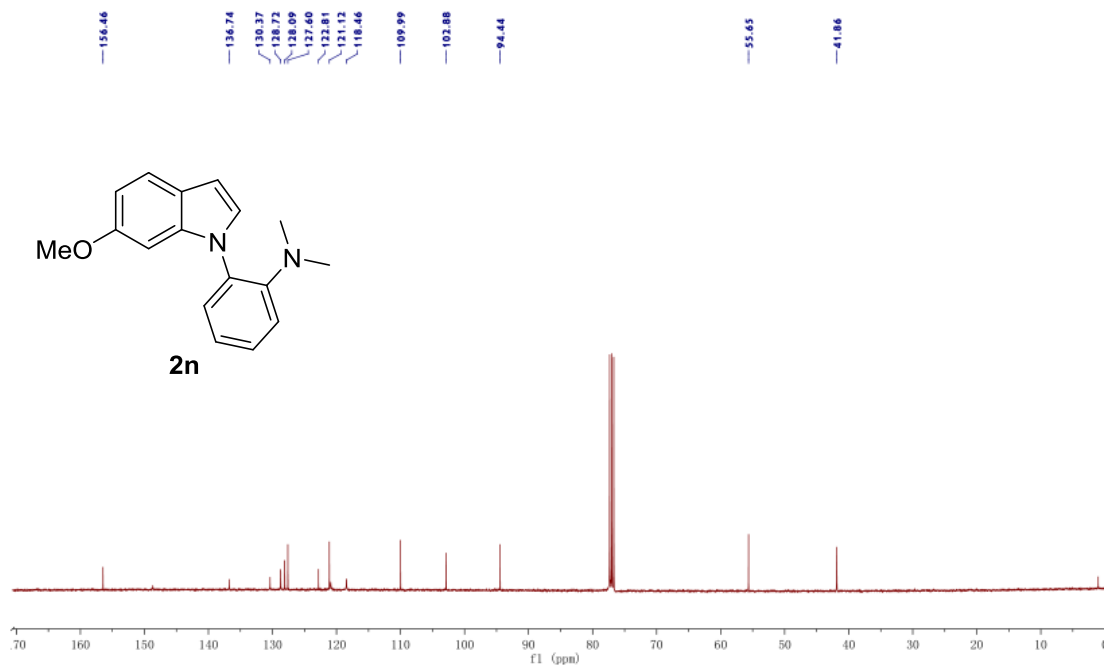

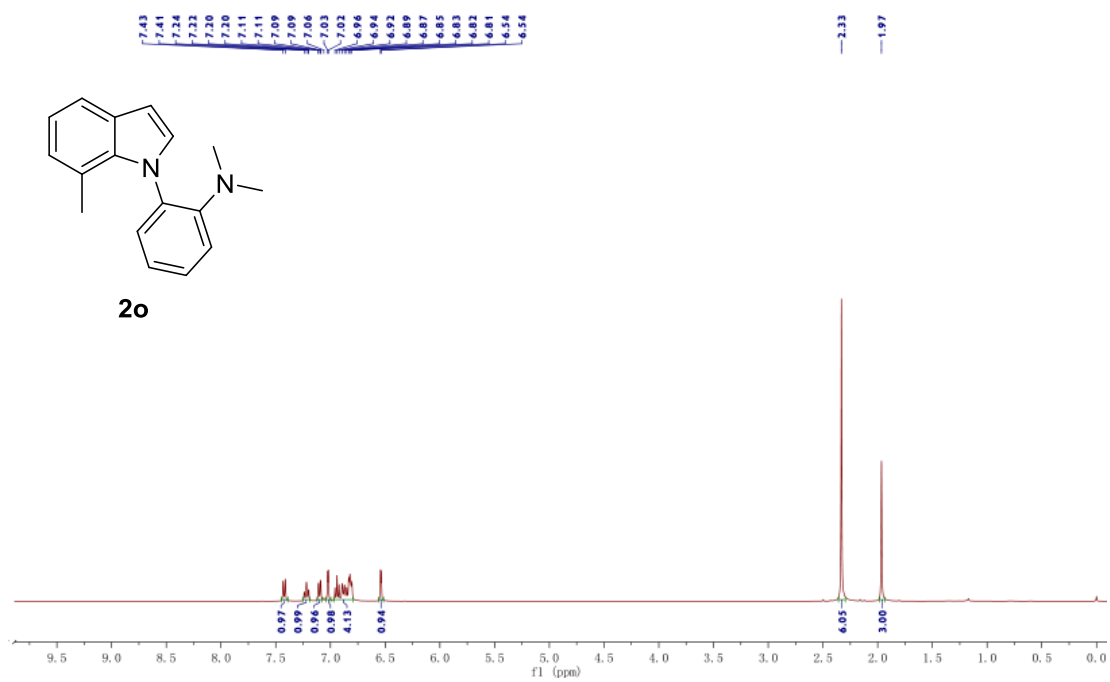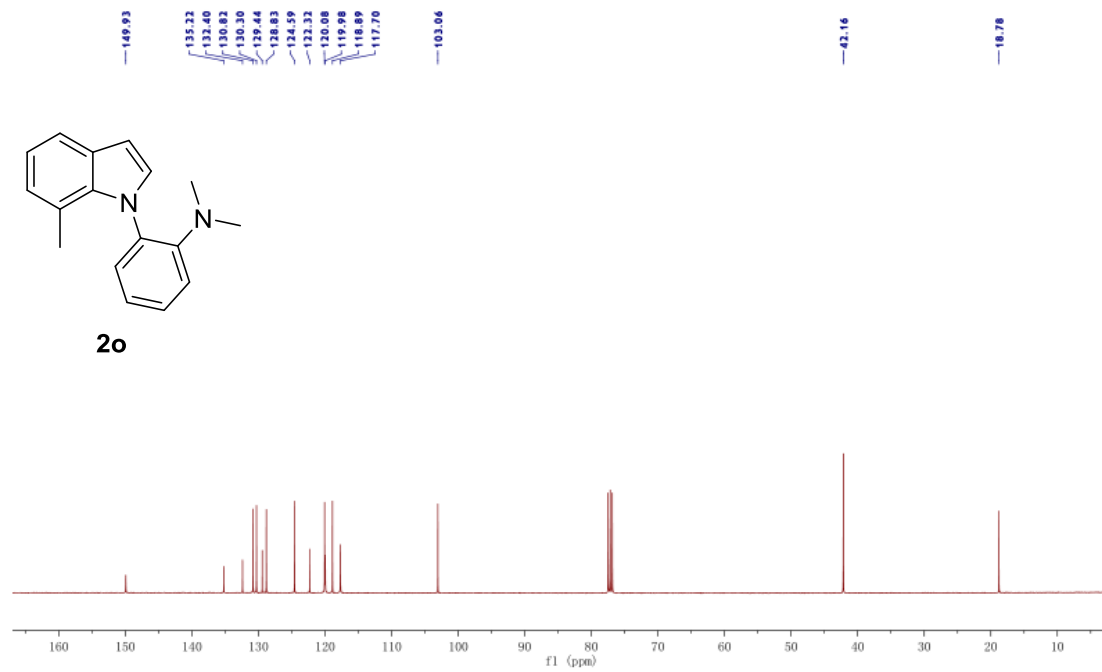



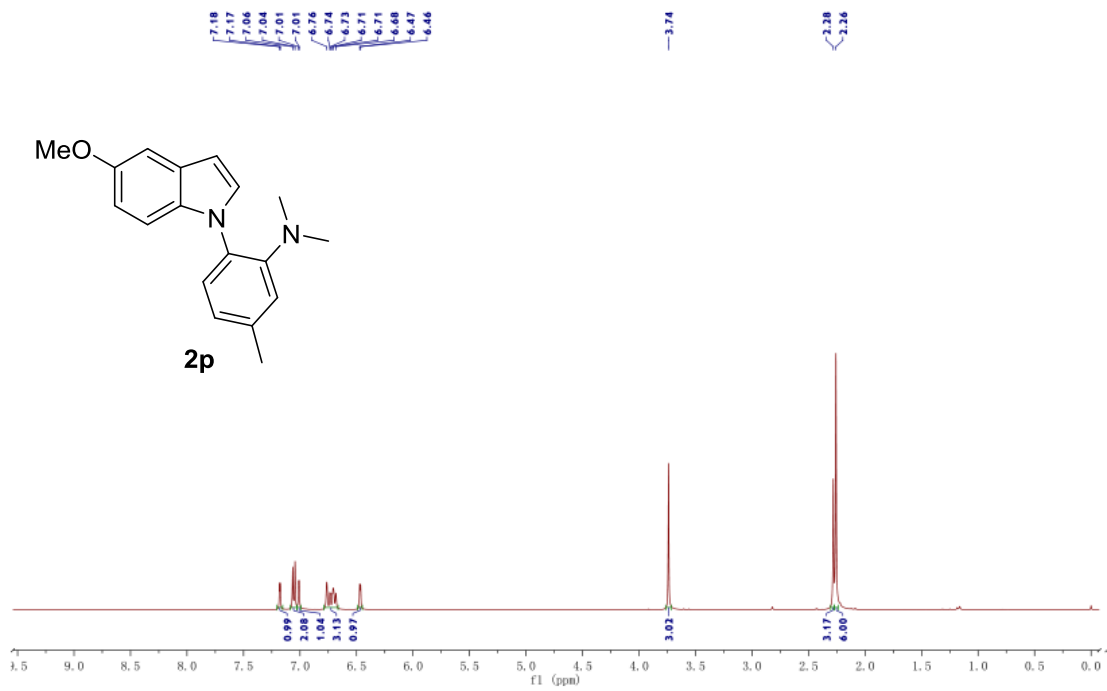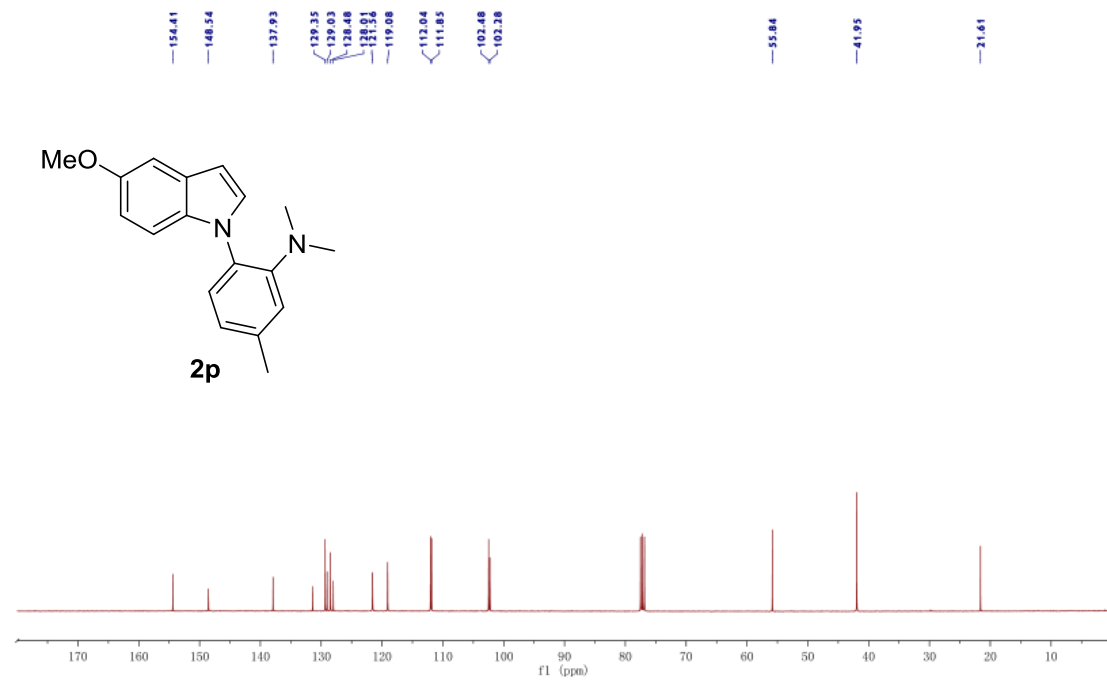

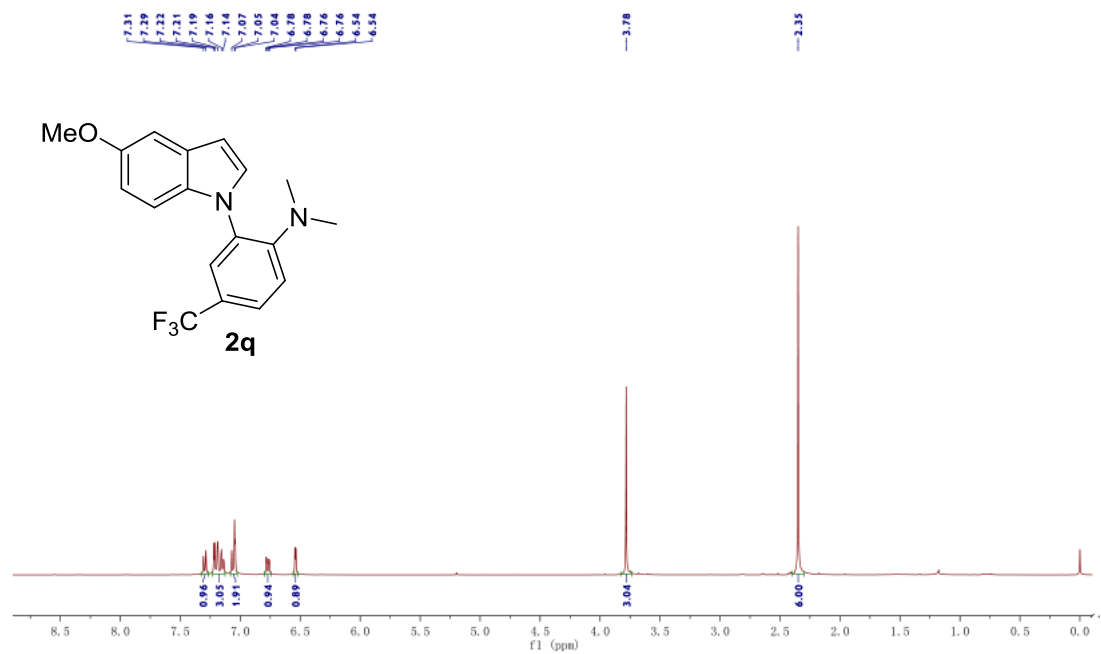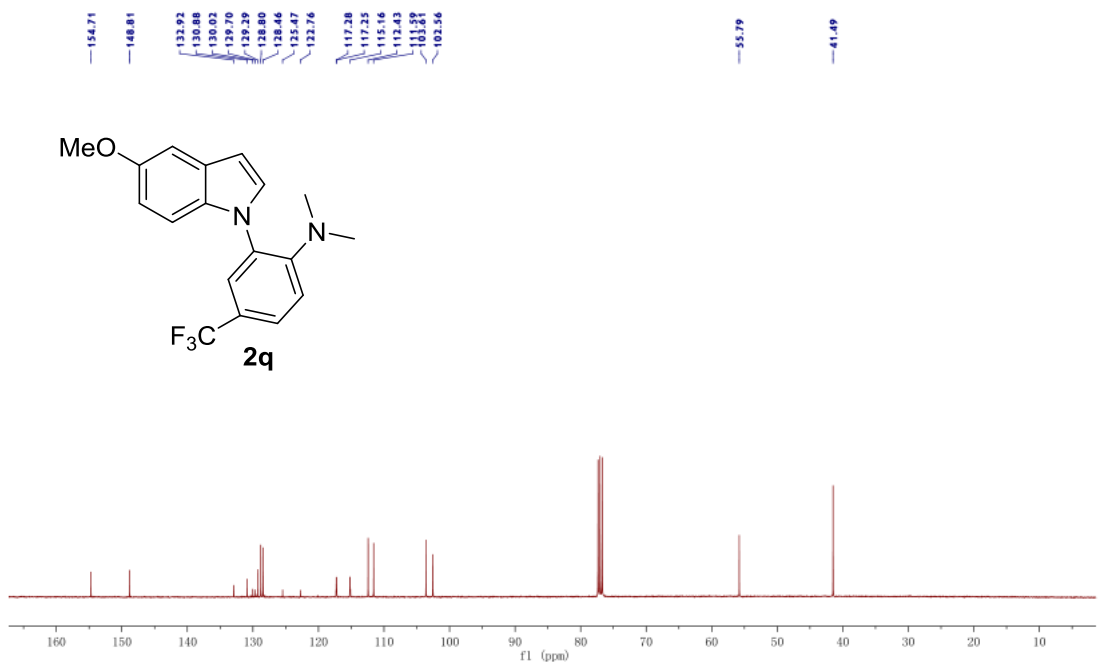

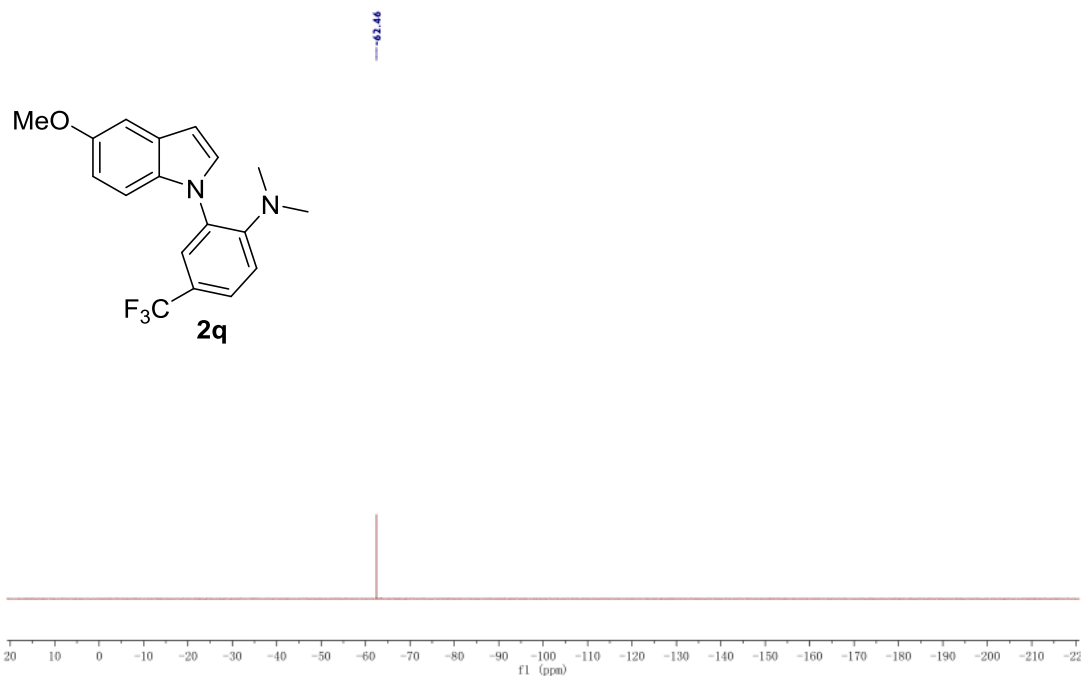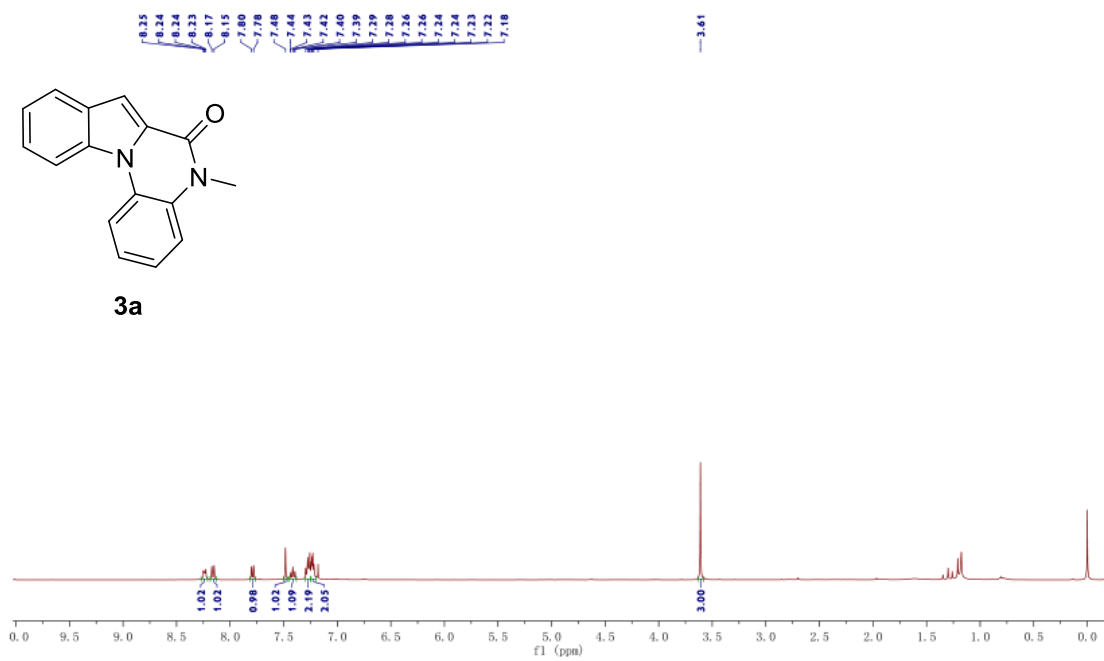

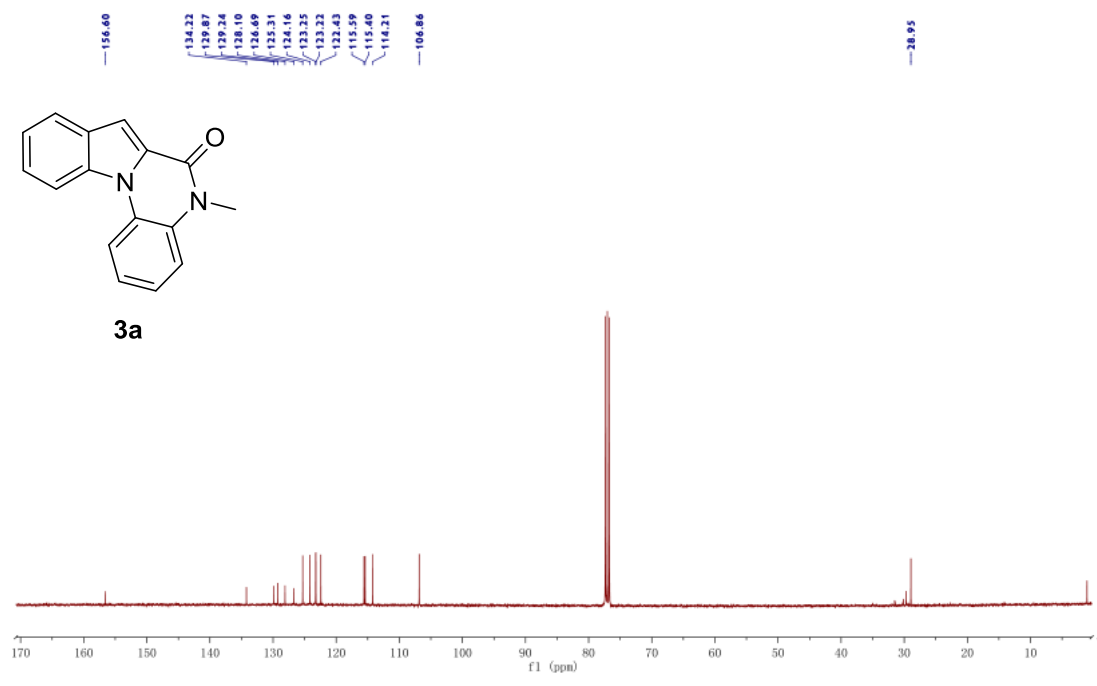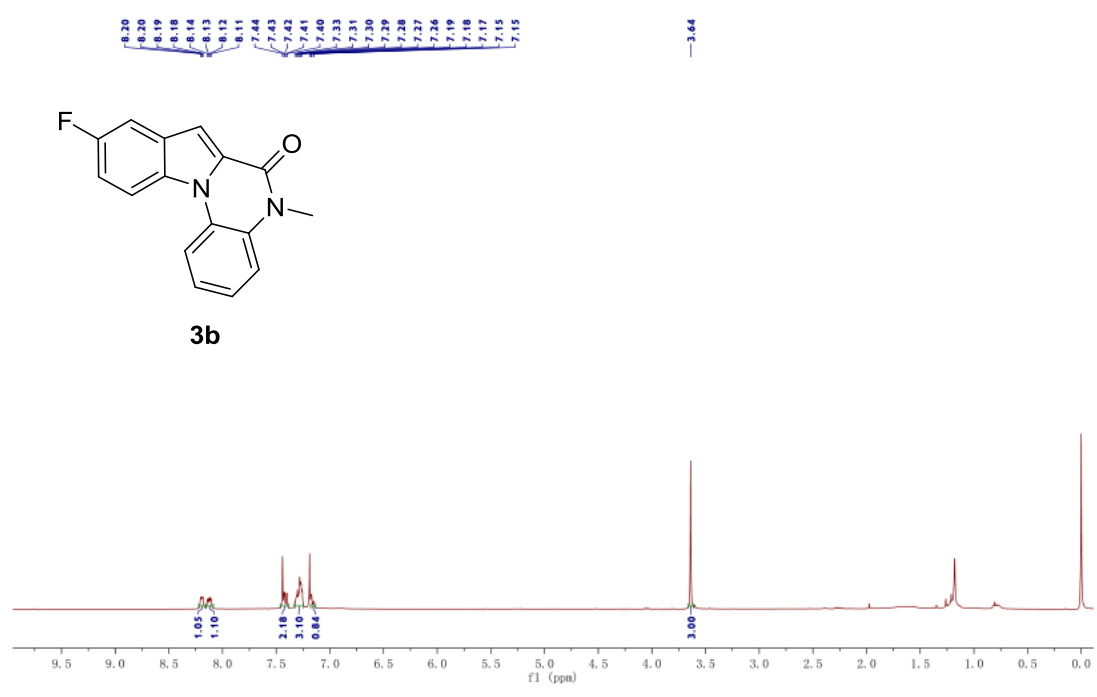

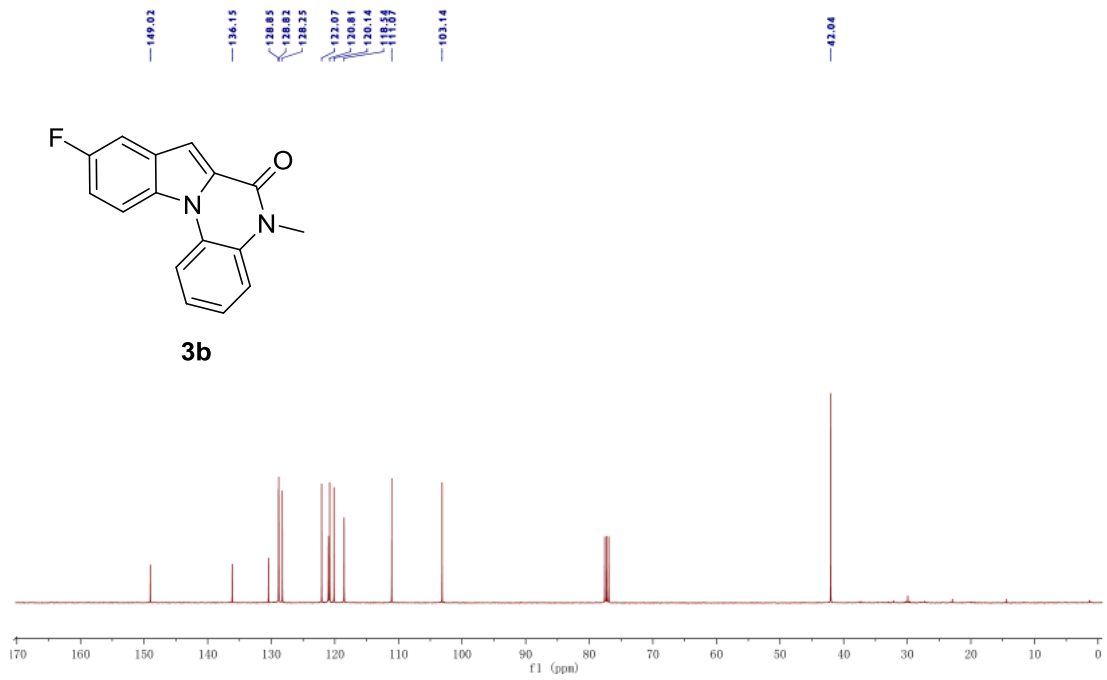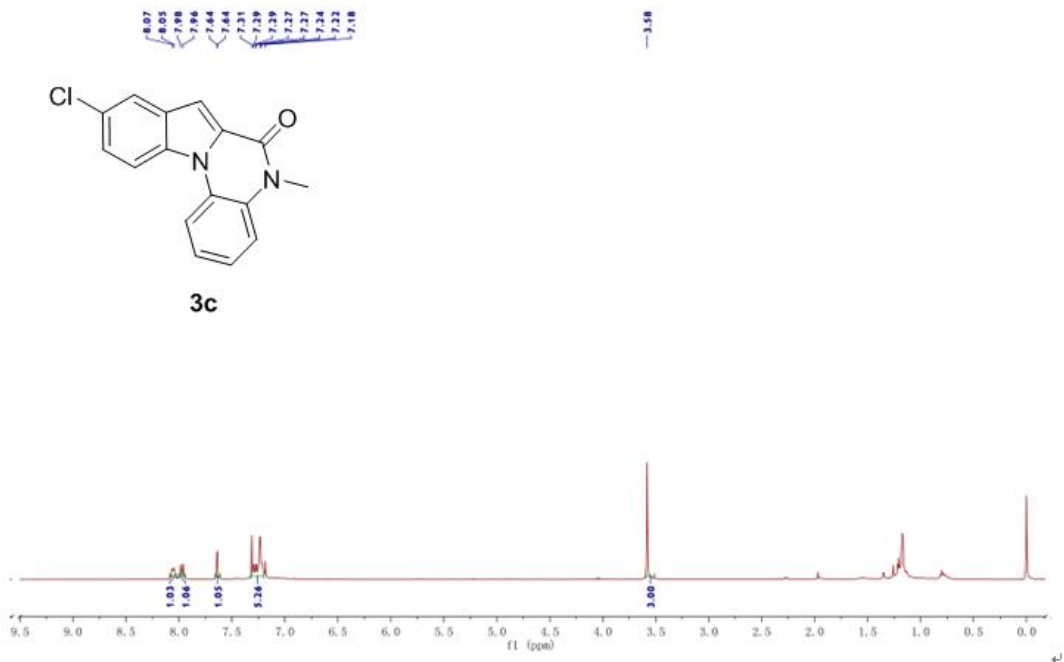

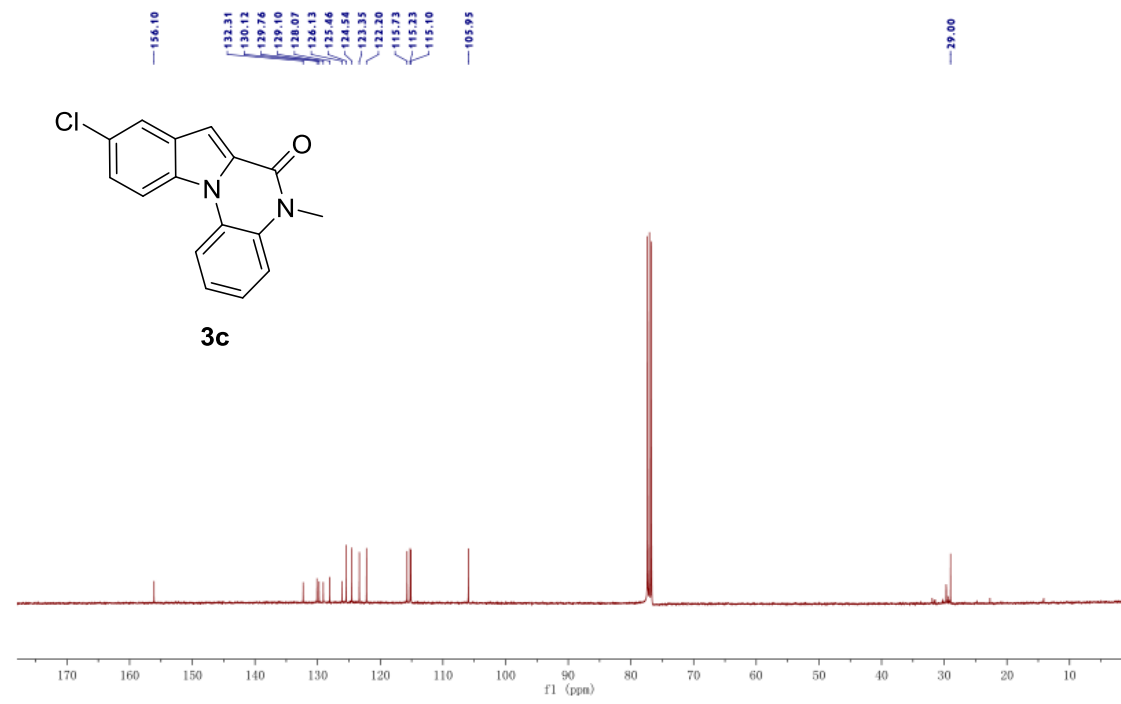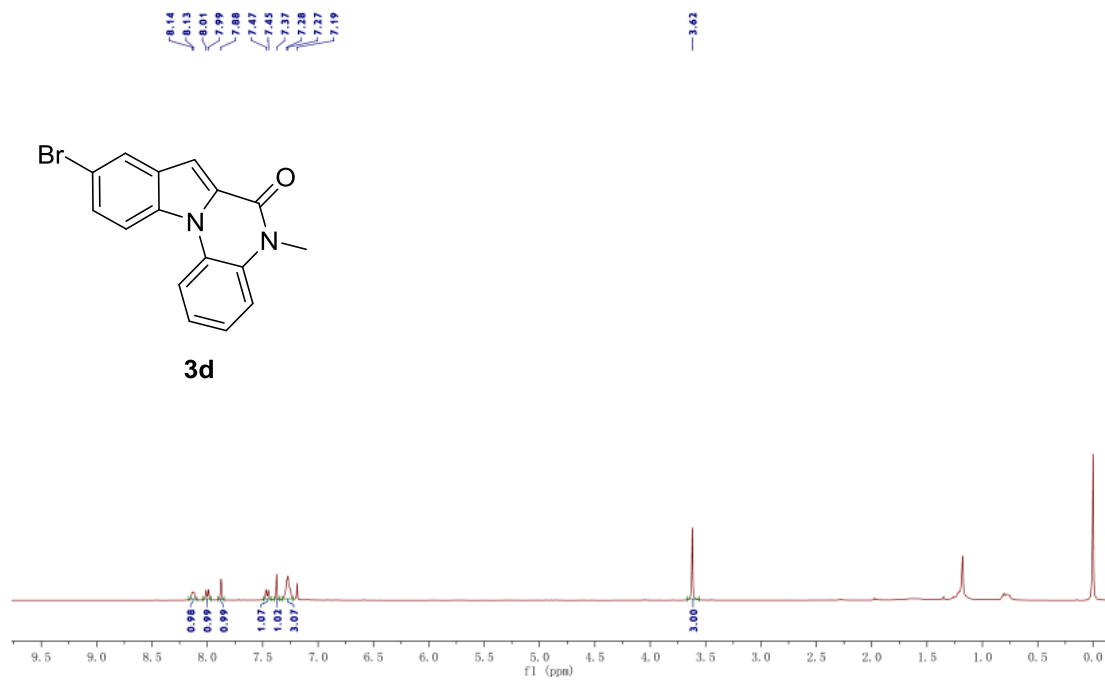

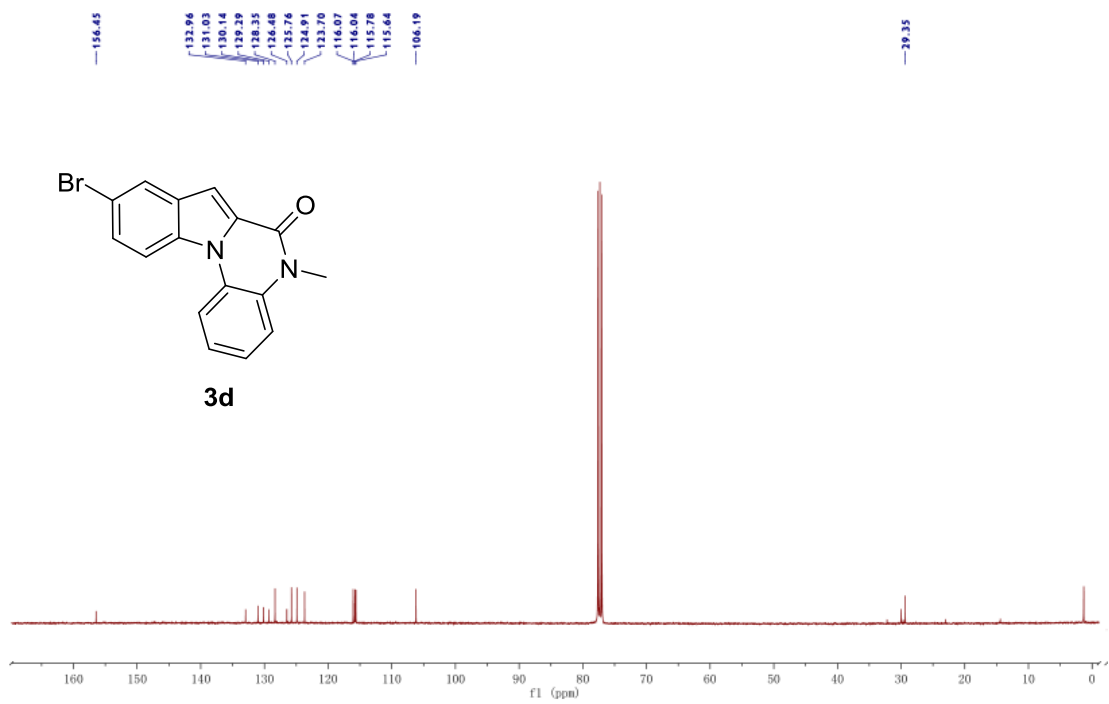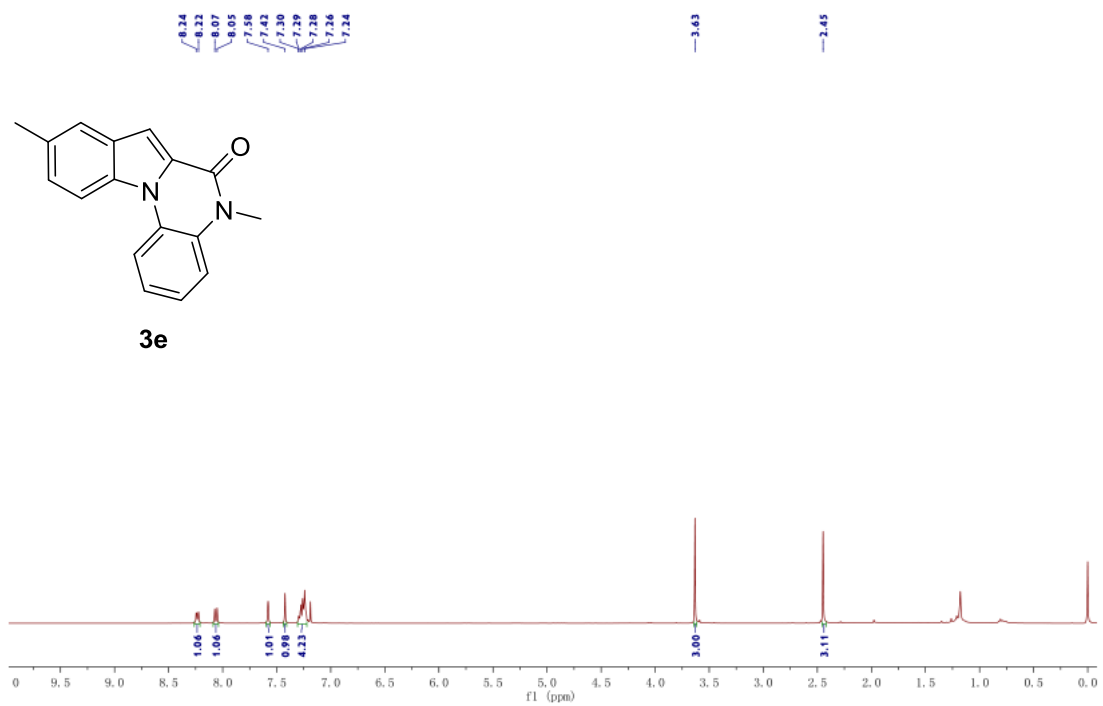

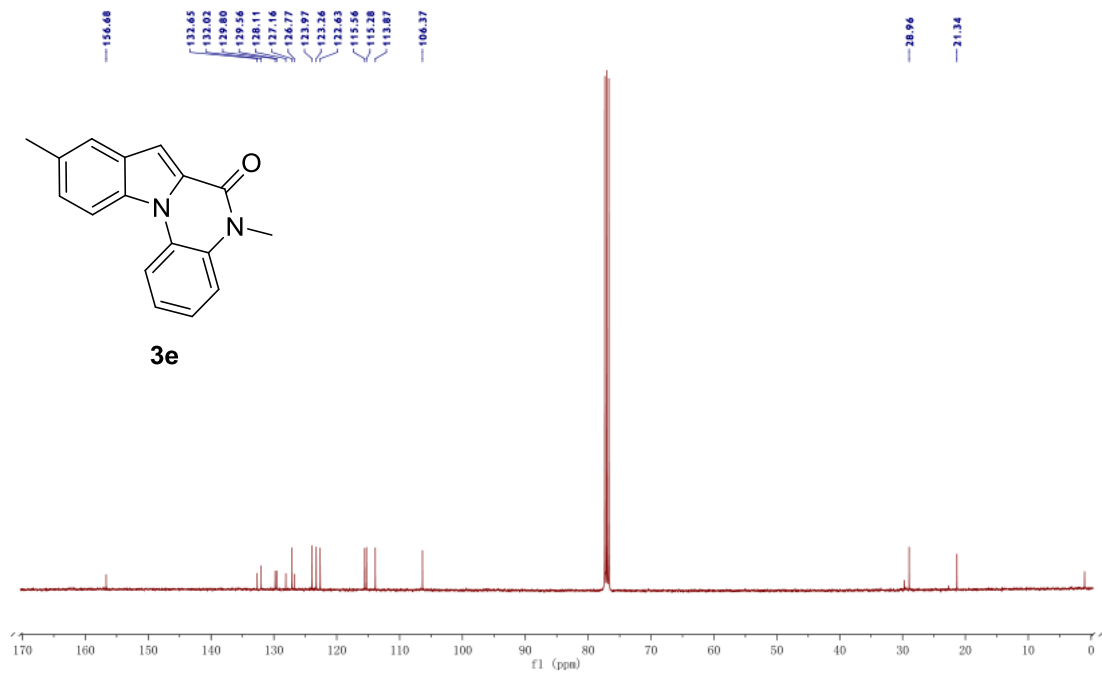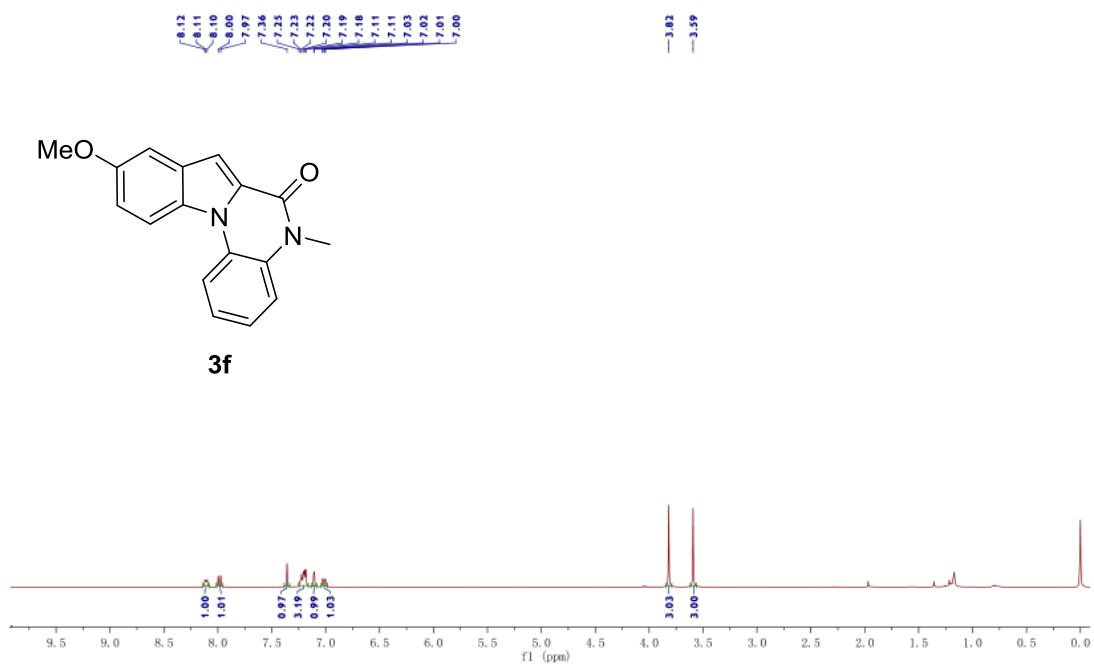



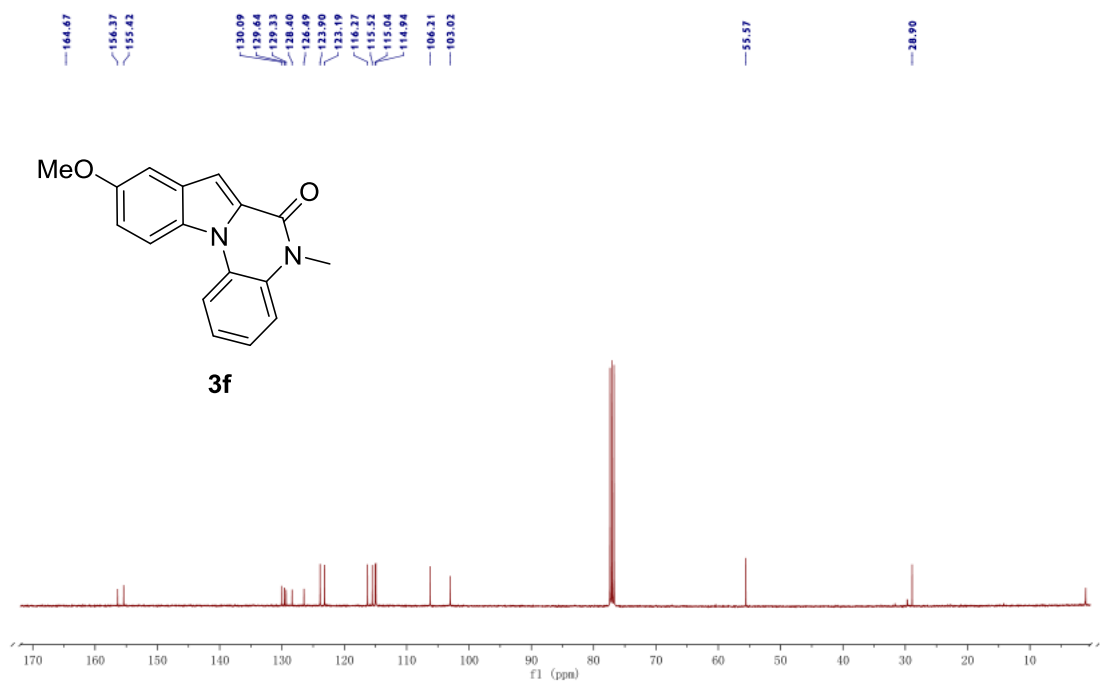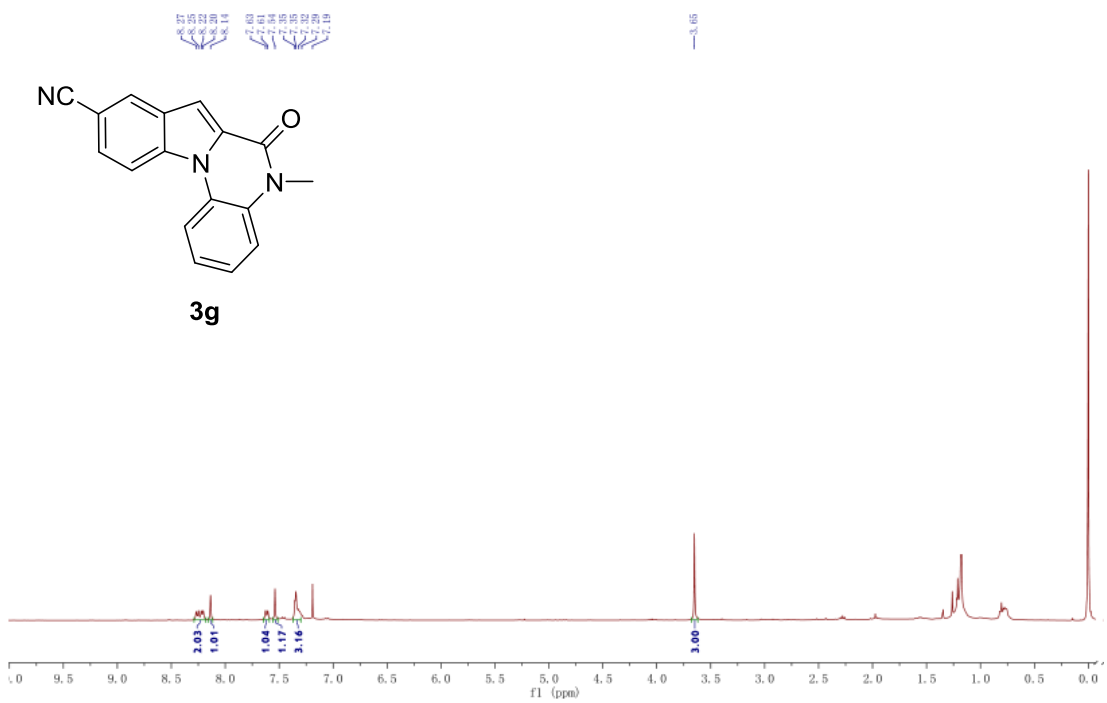

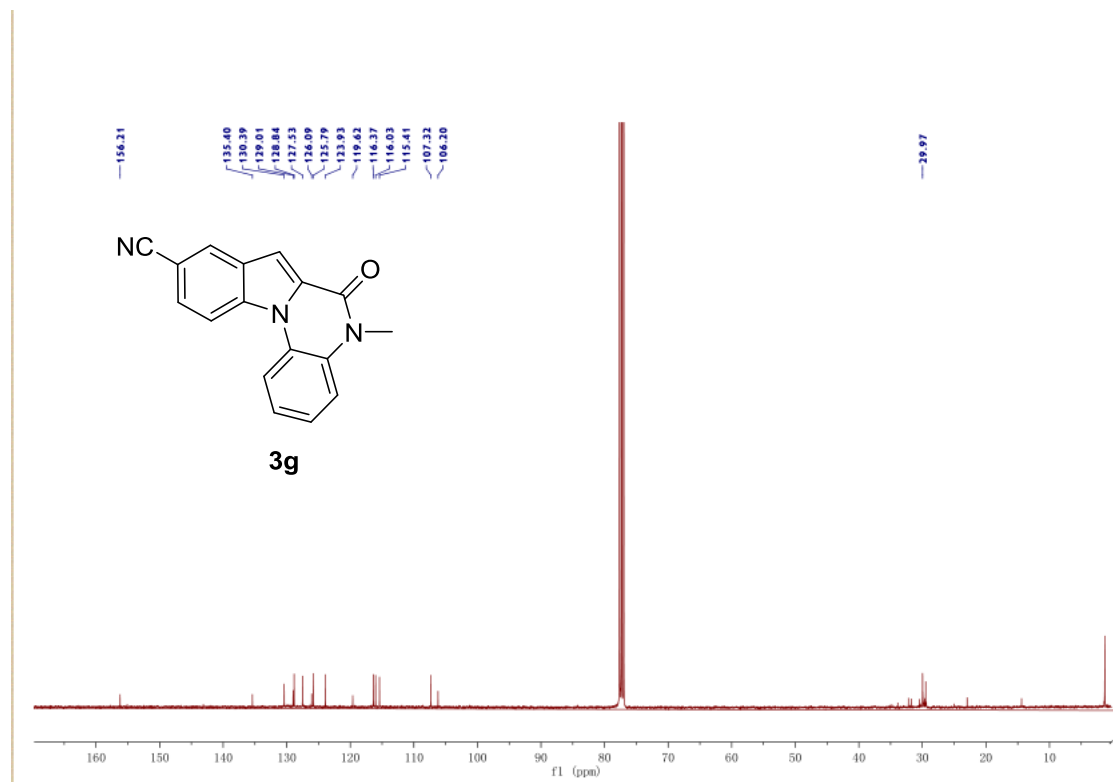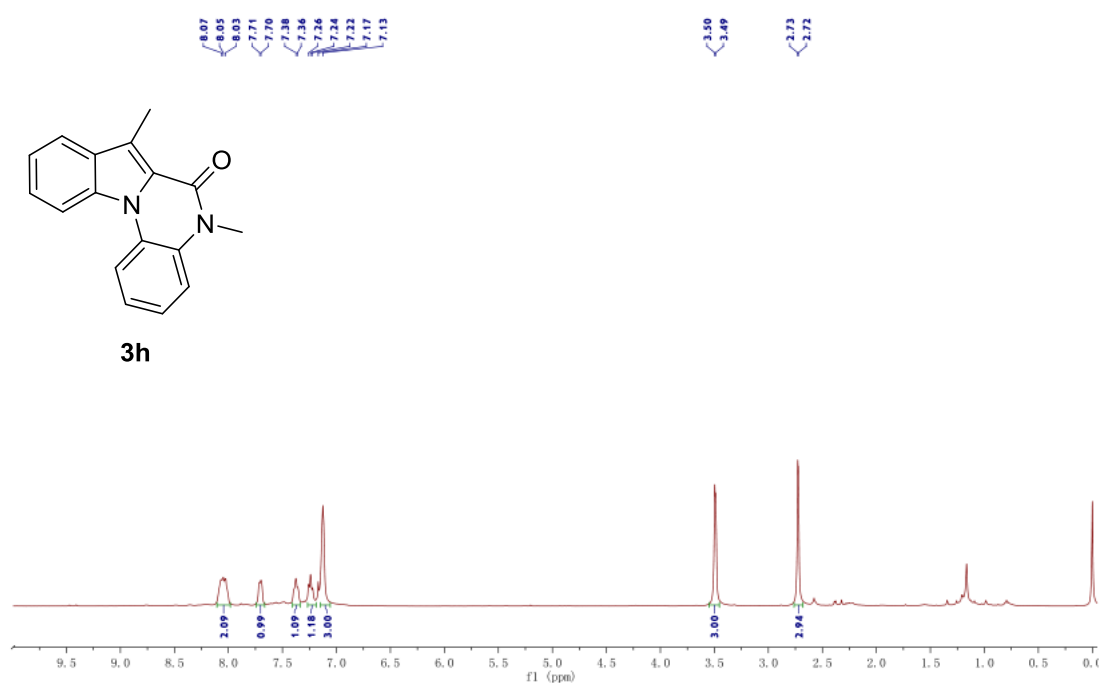

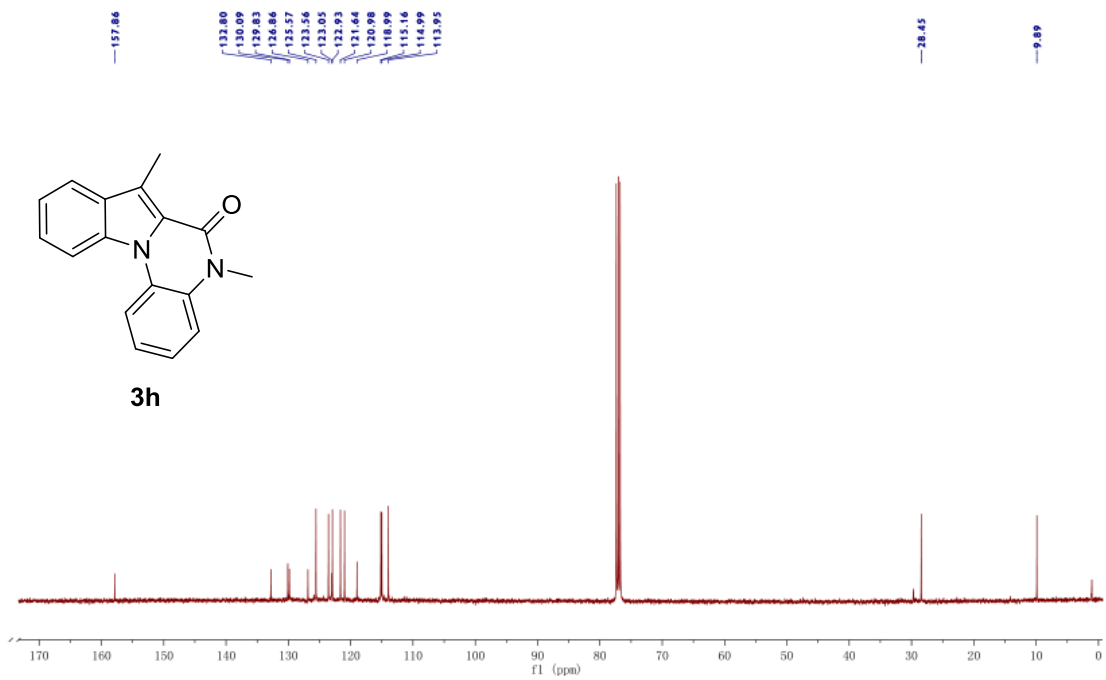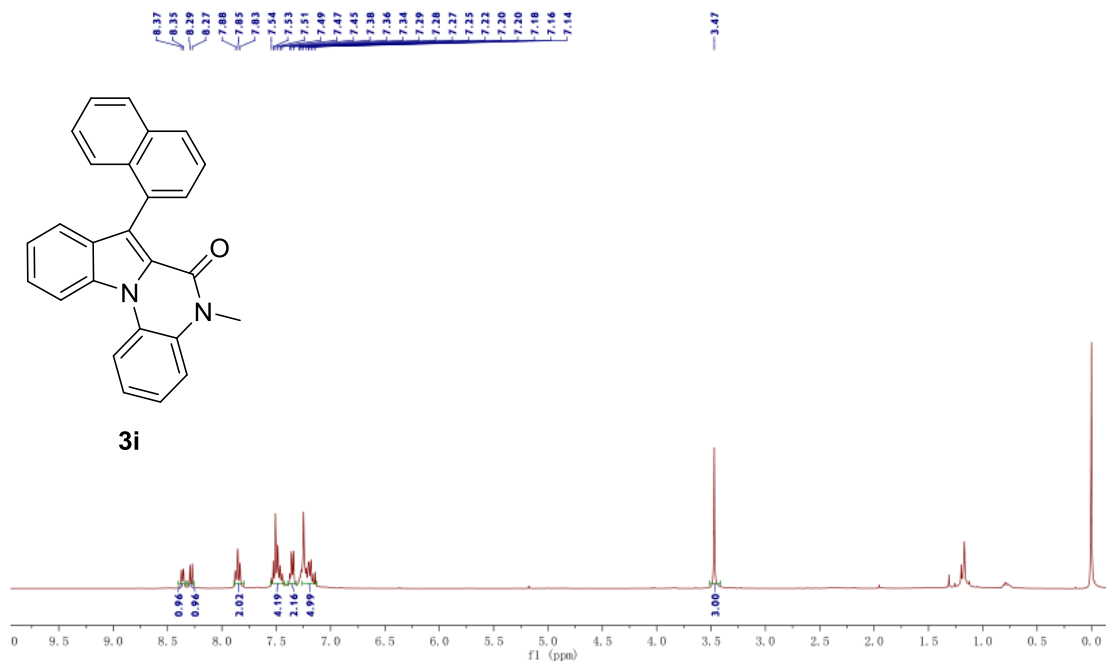

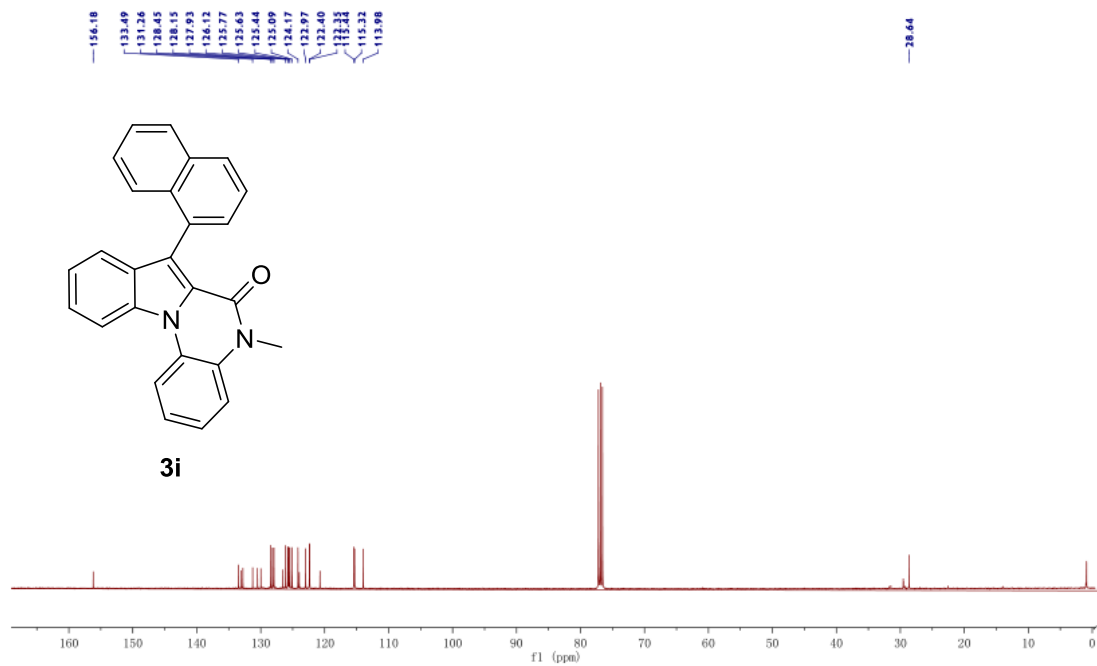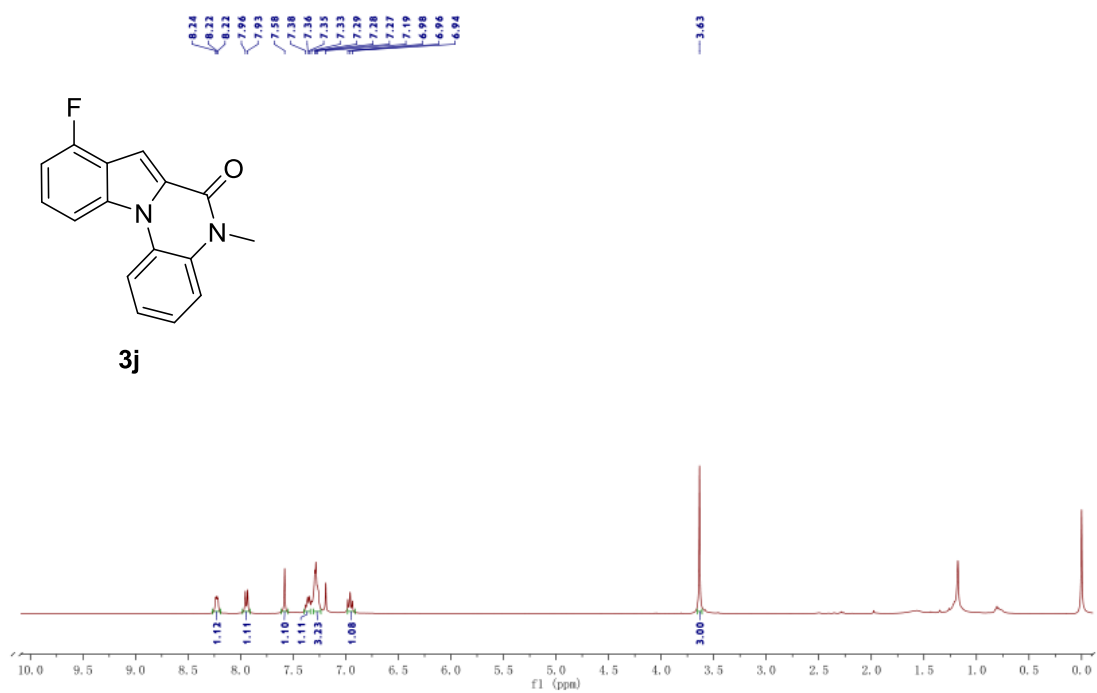

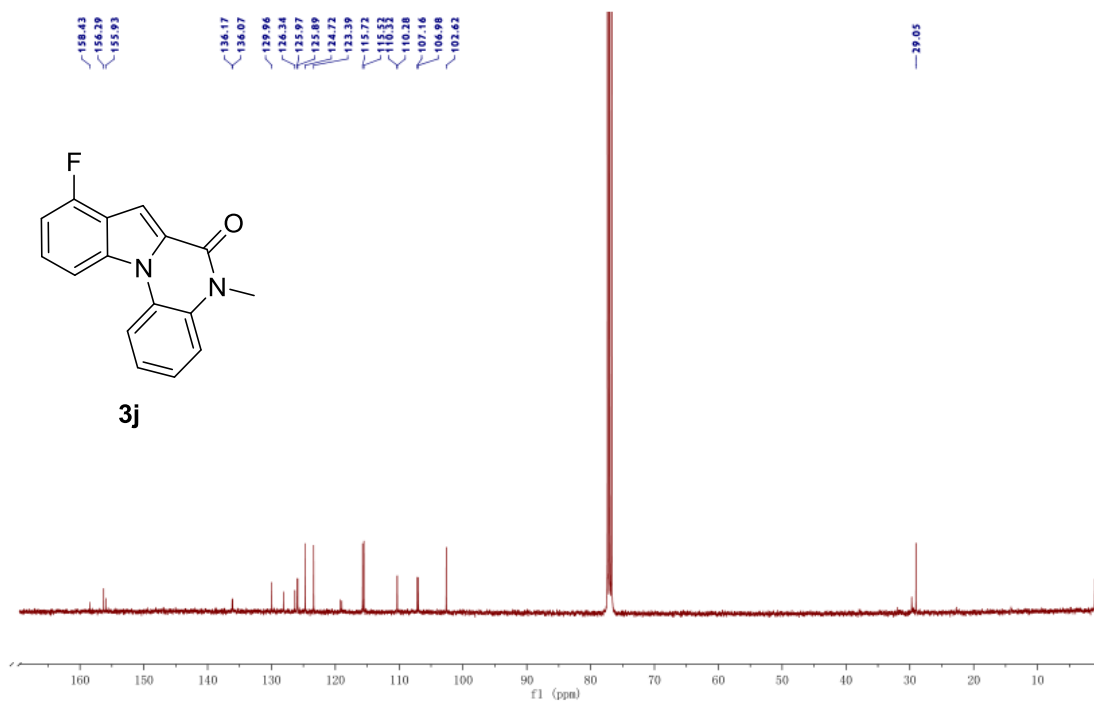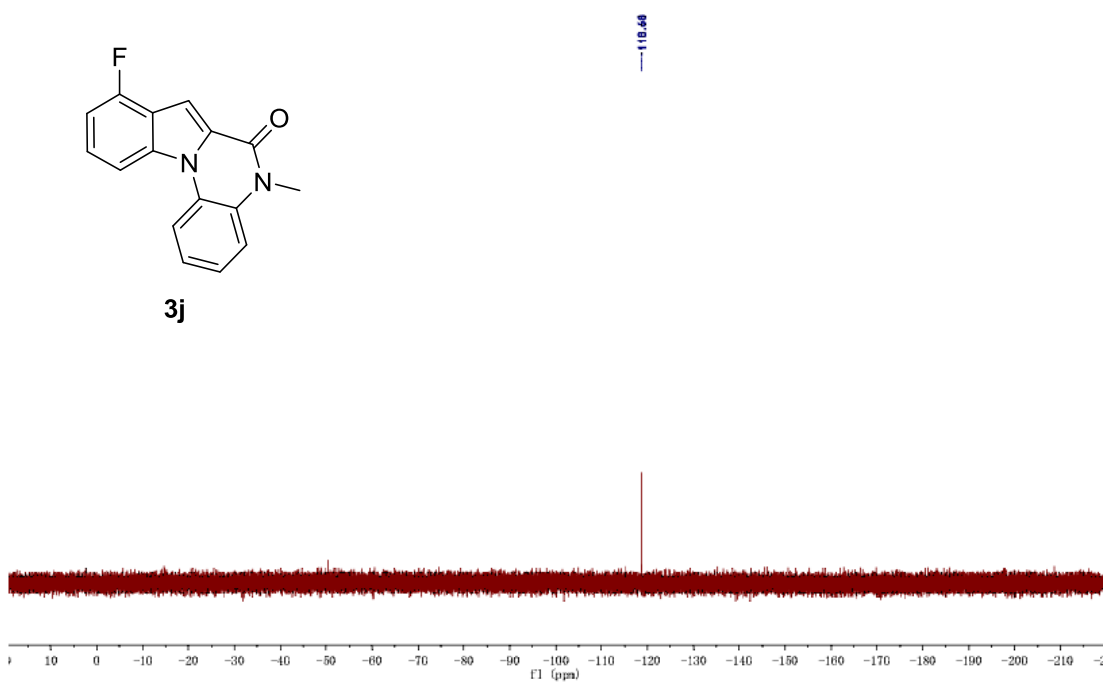

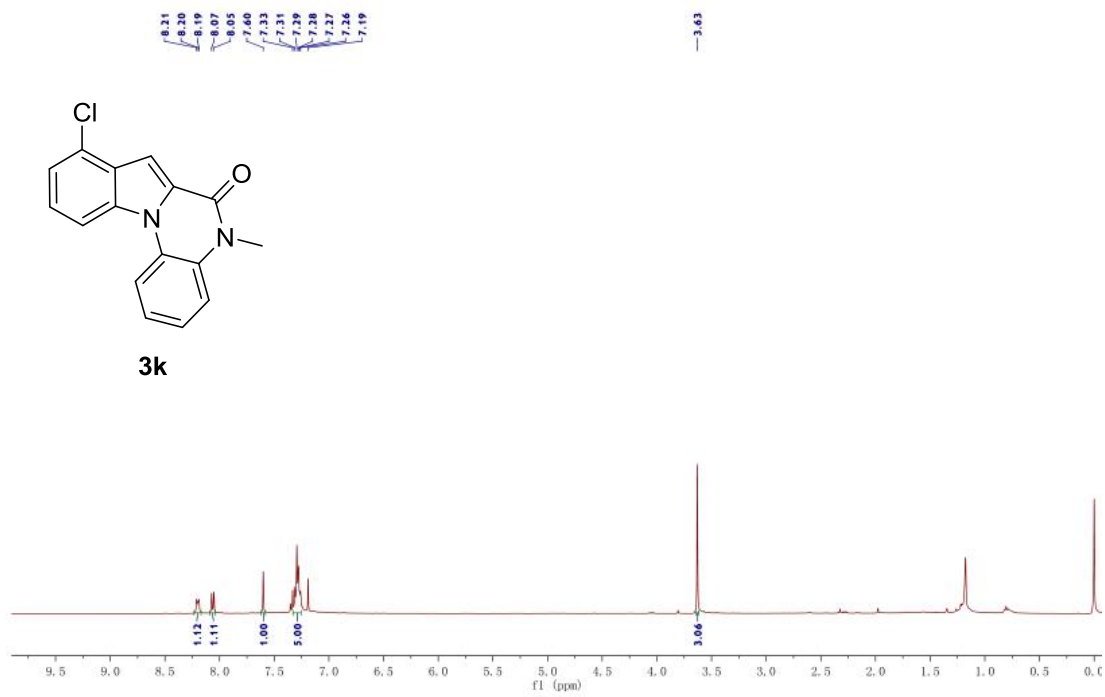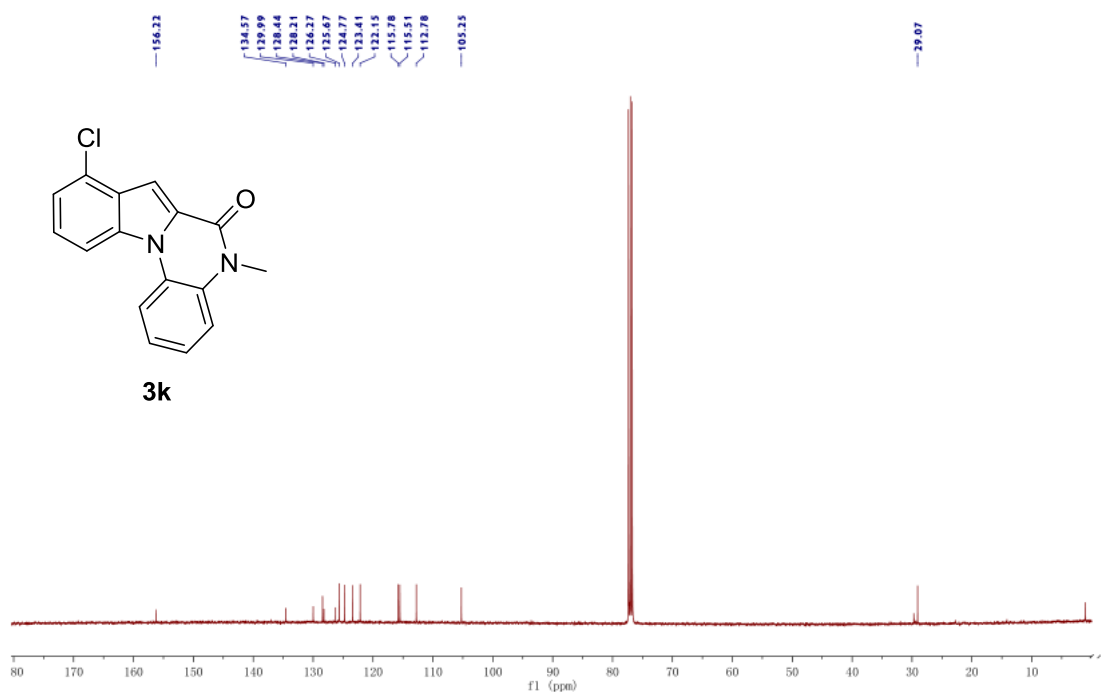

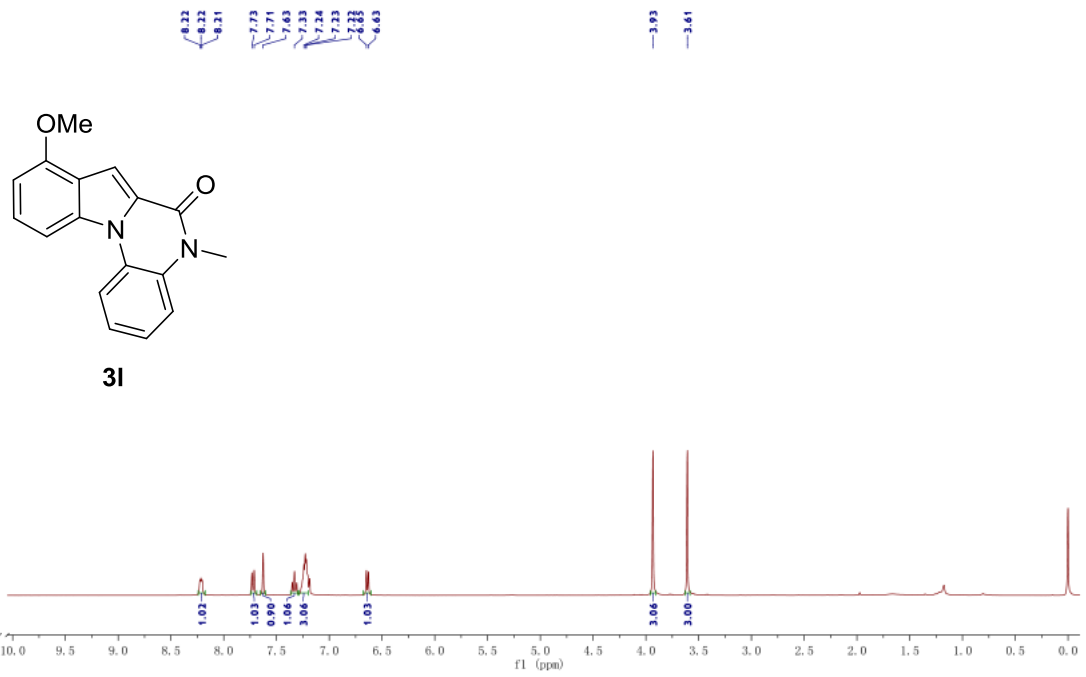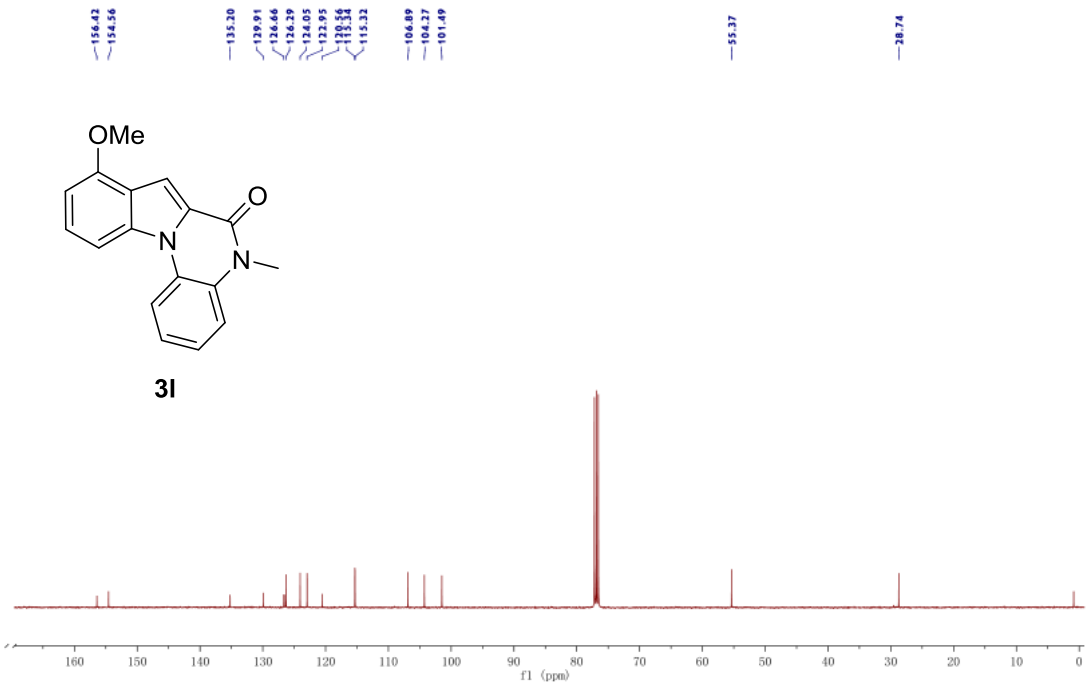

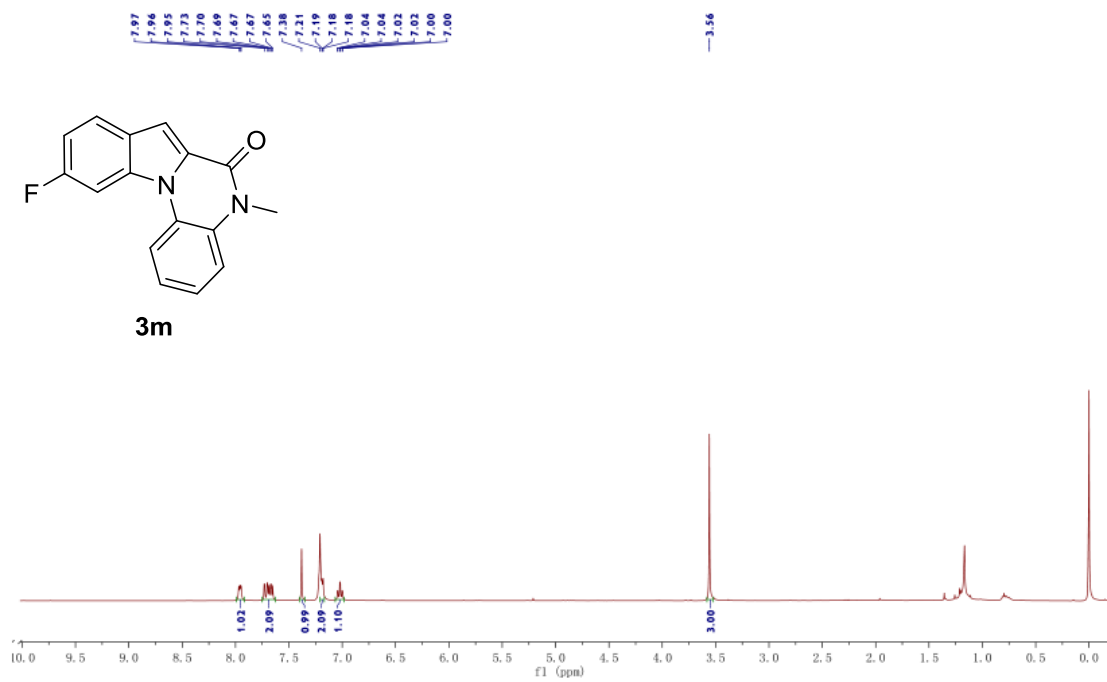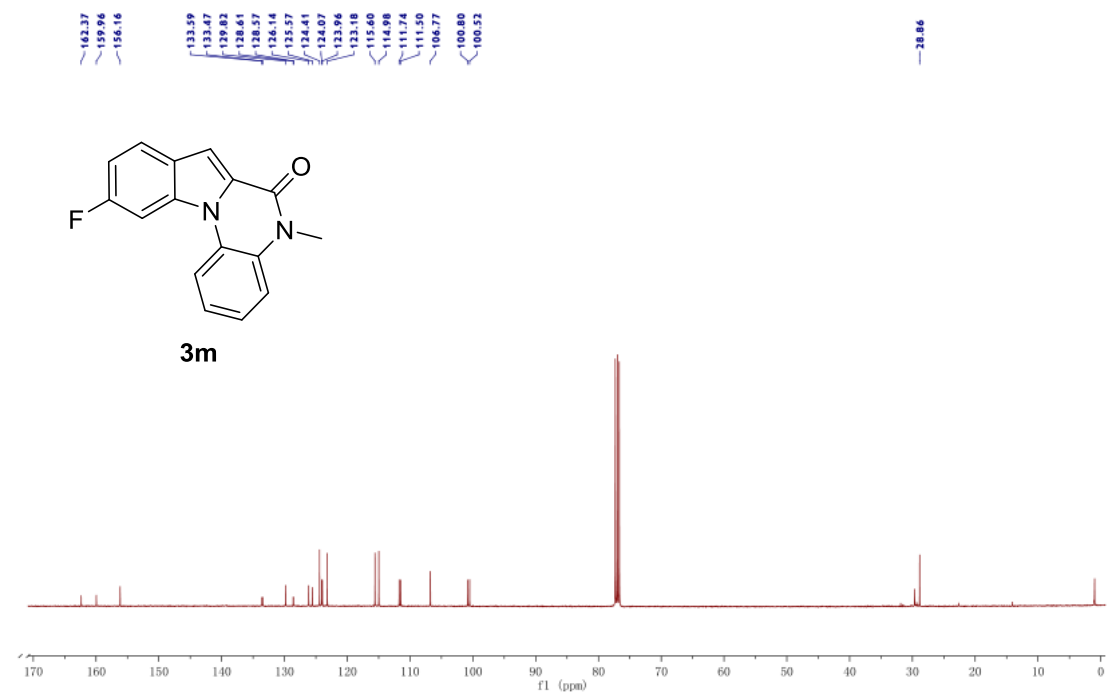



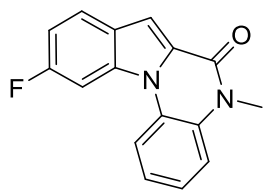

3m

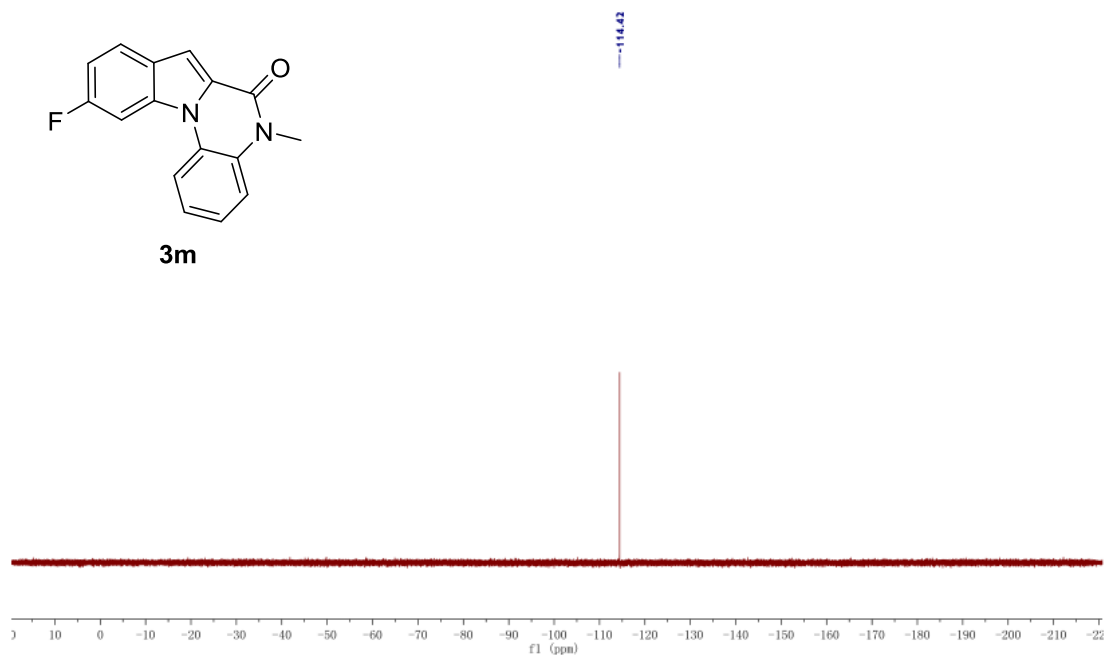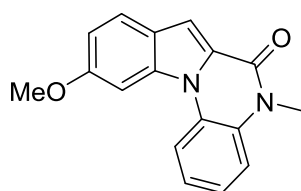

3n

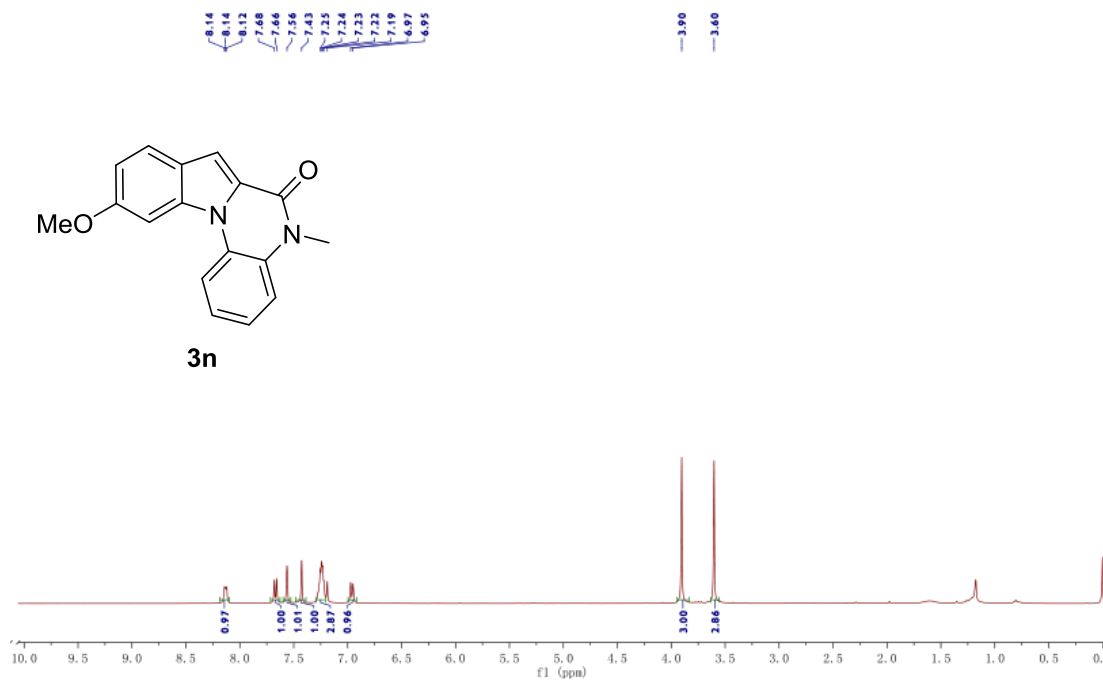

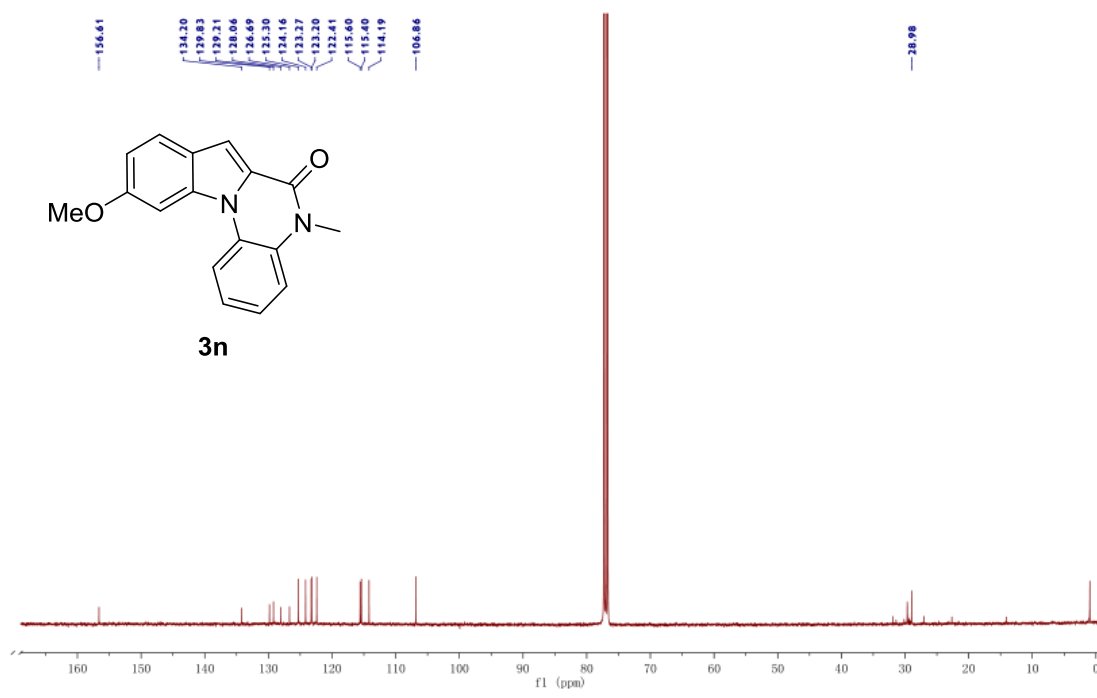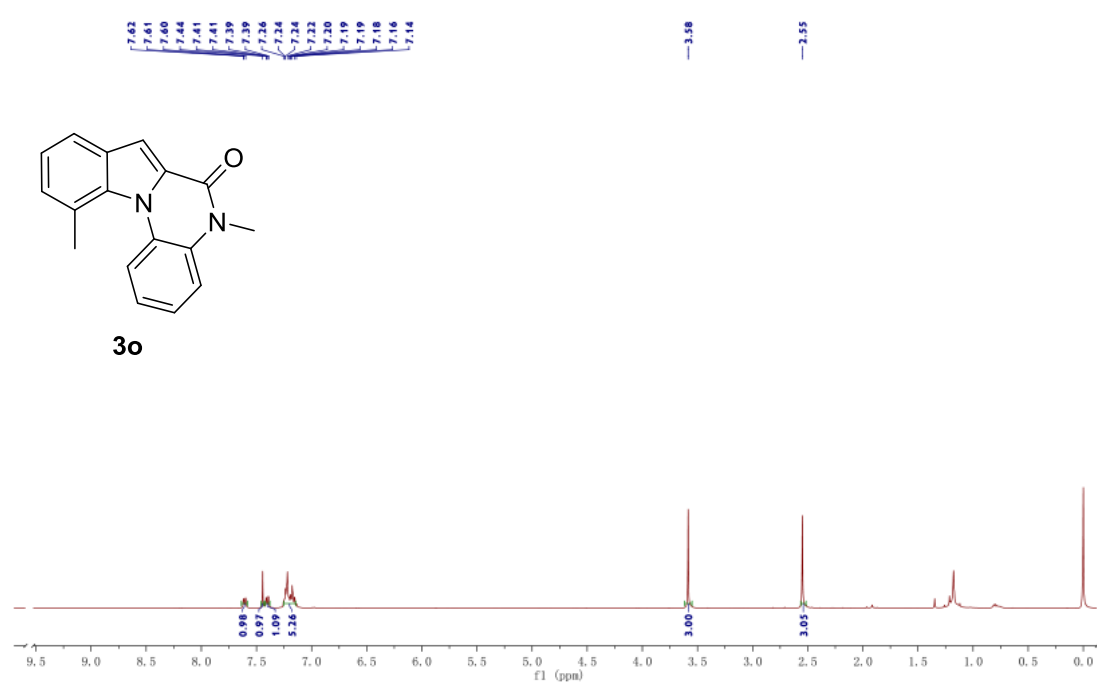

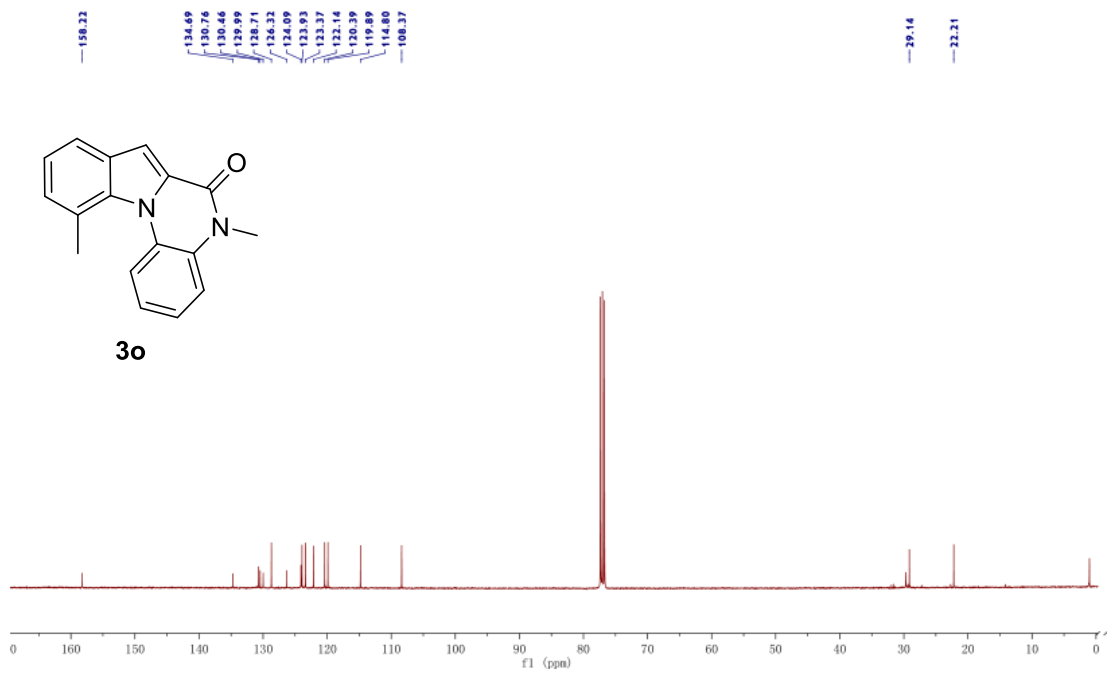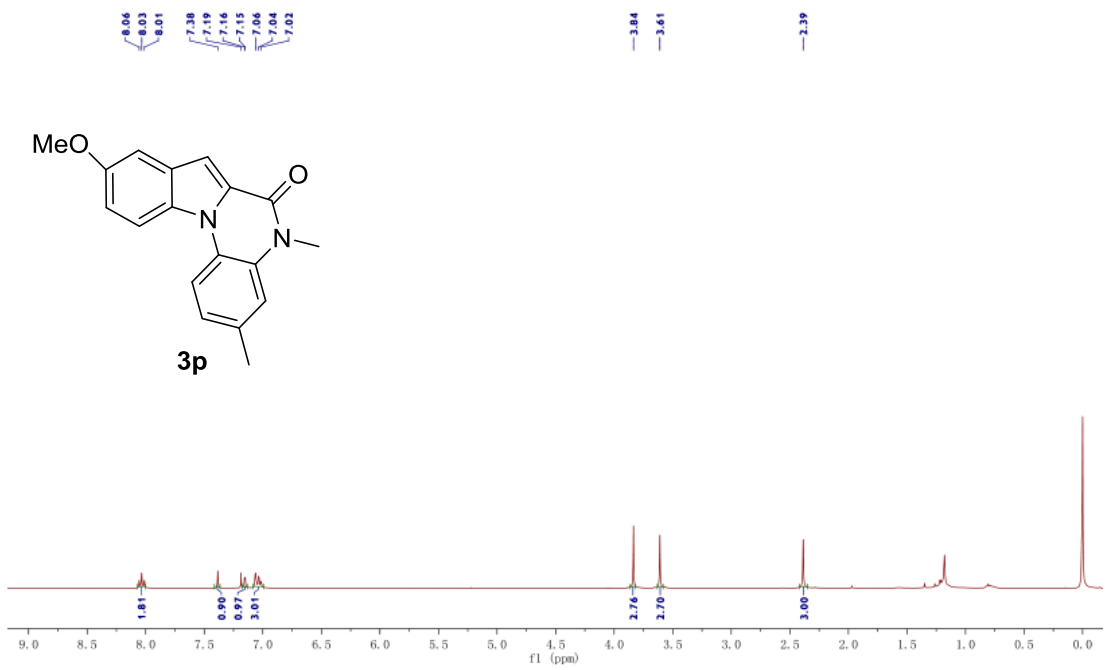

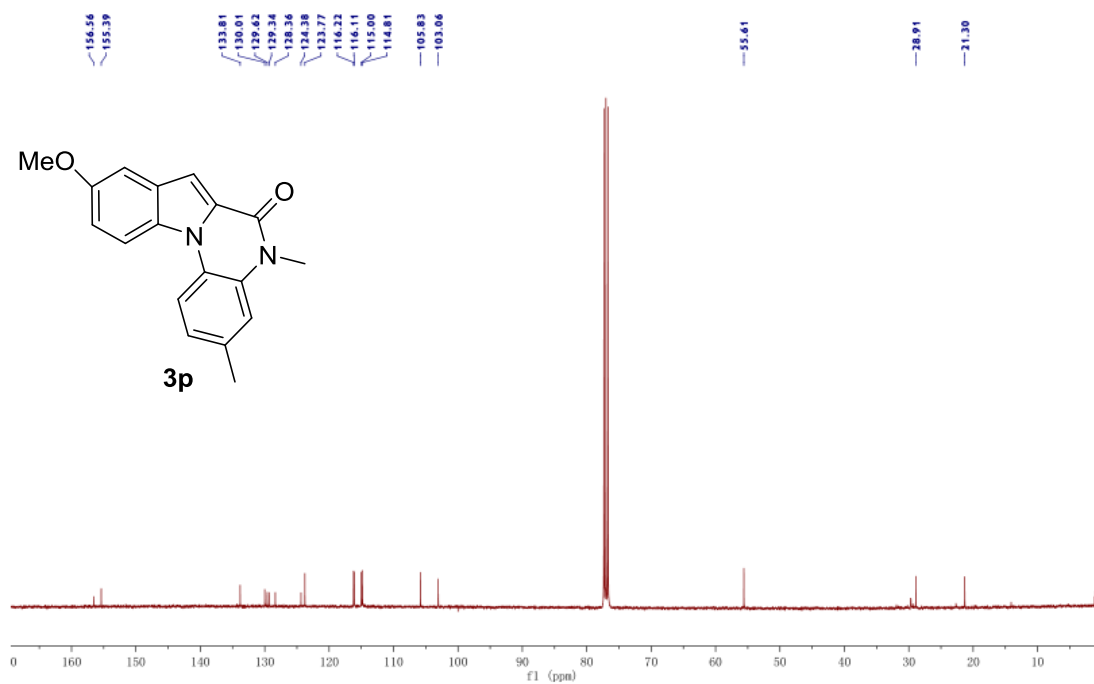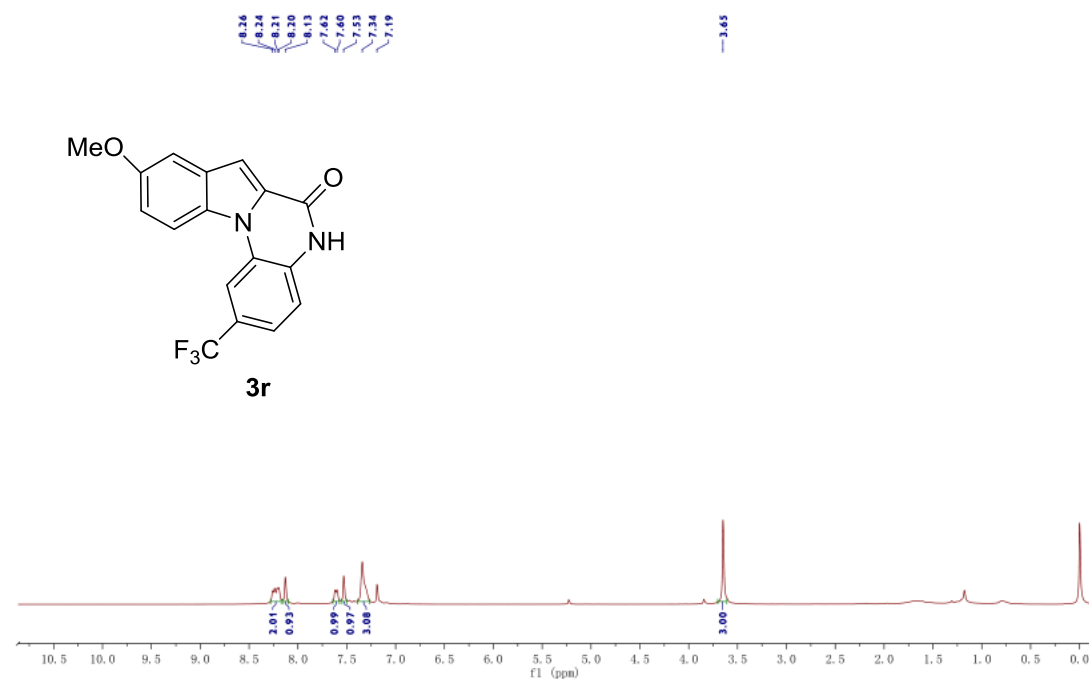

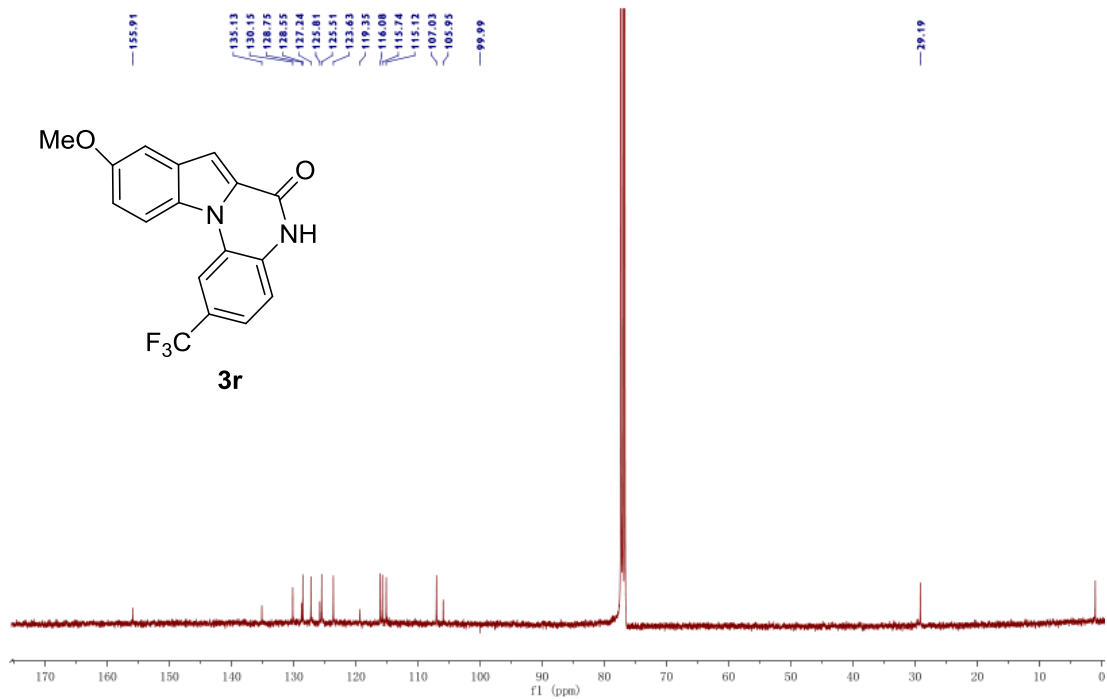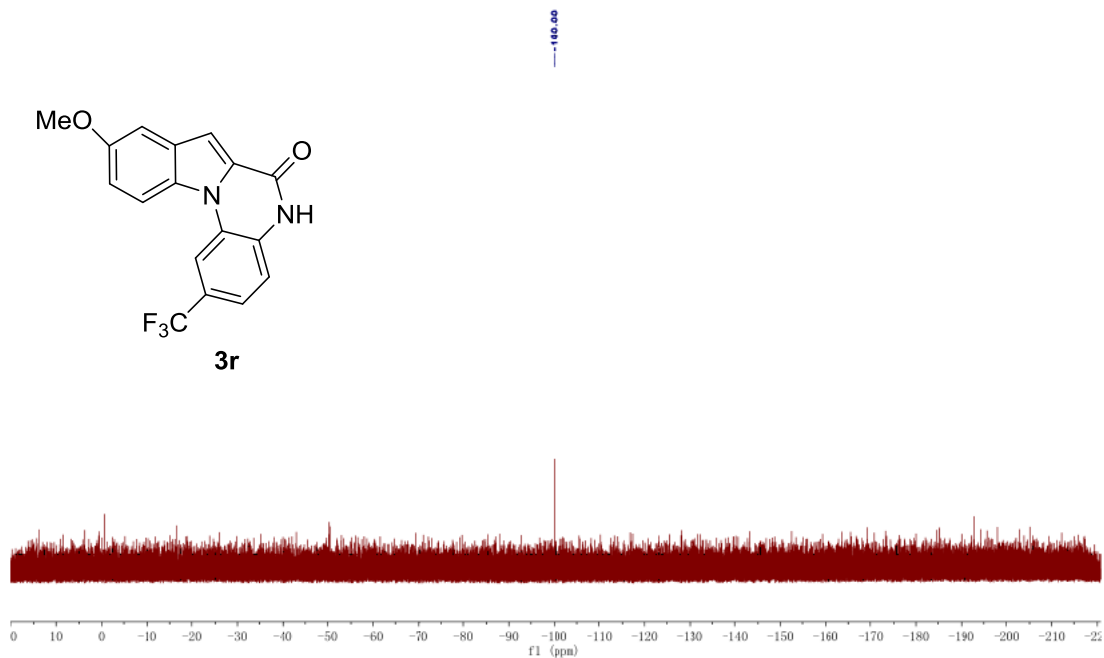

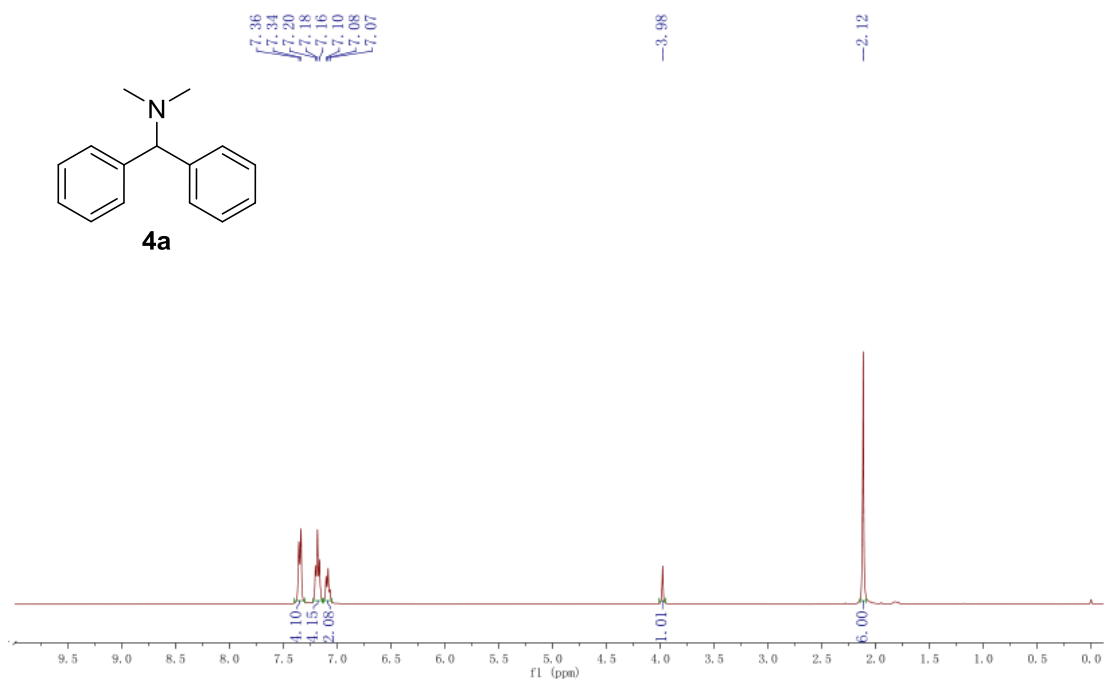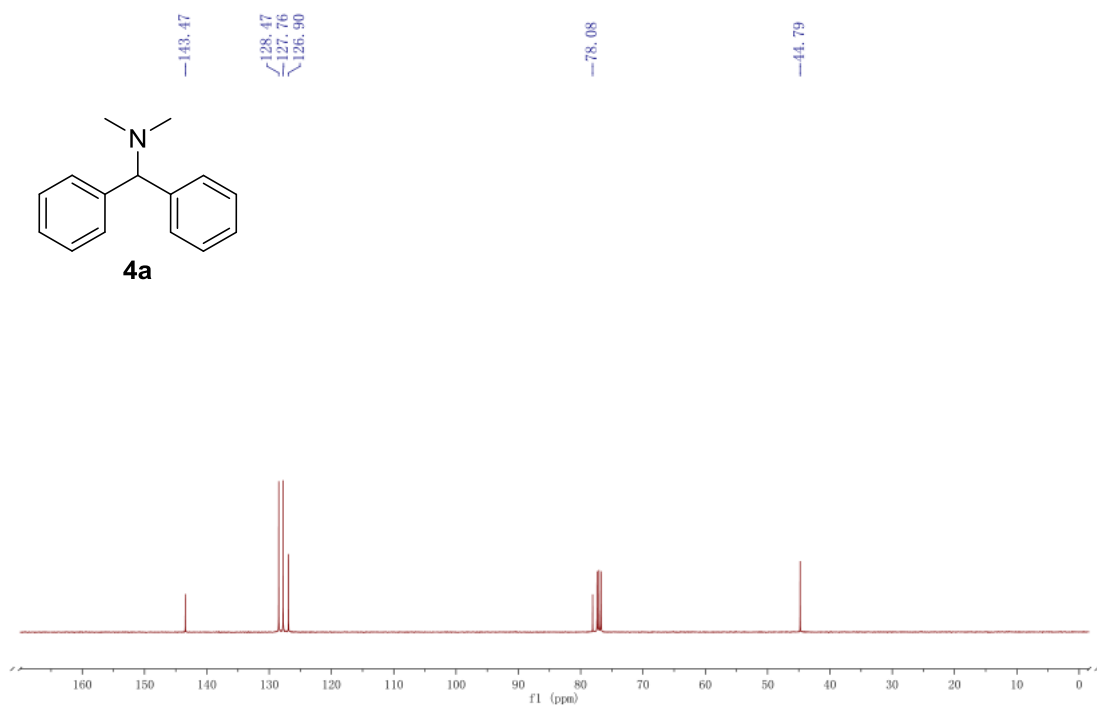

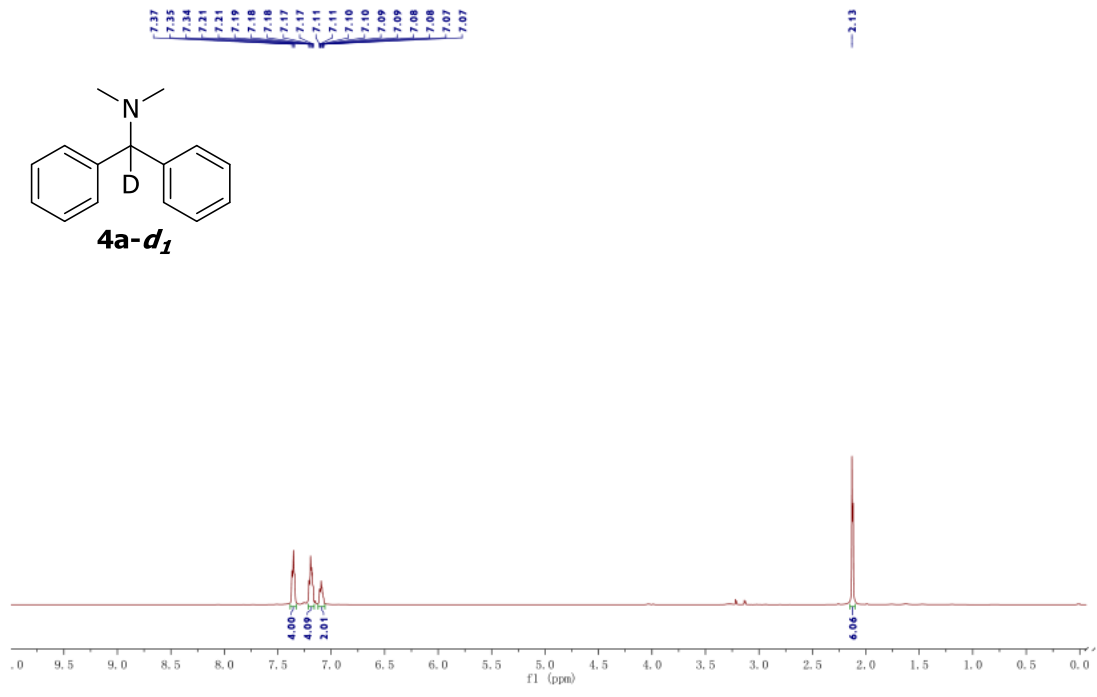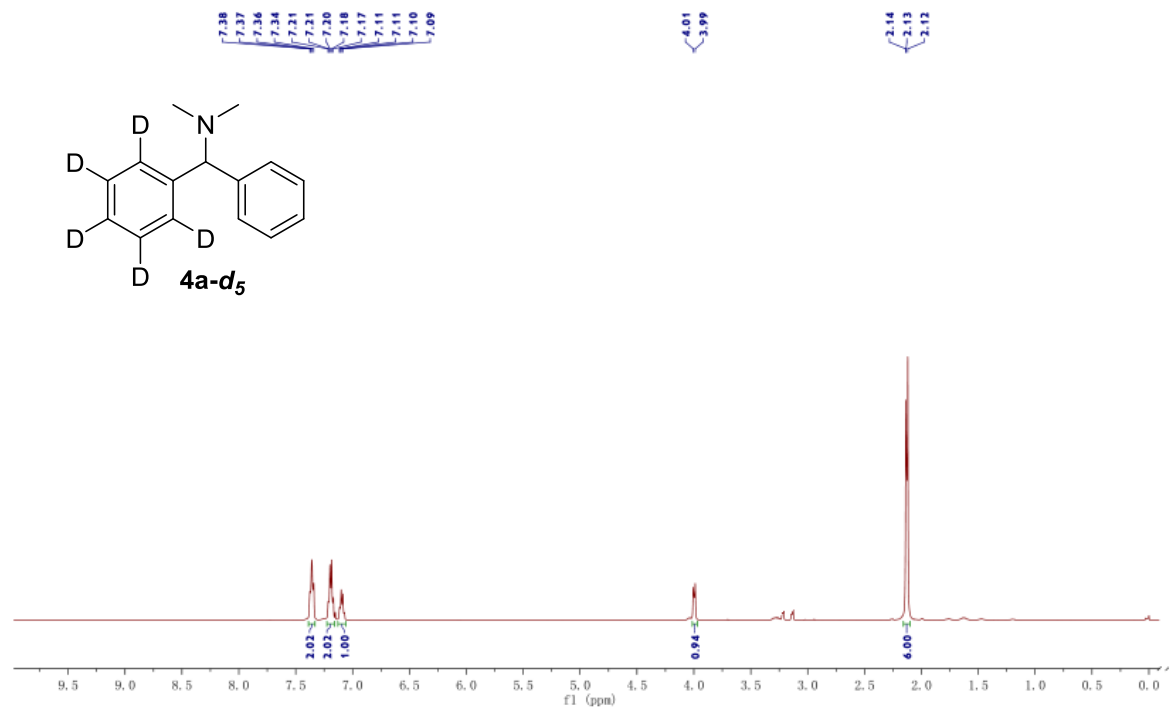

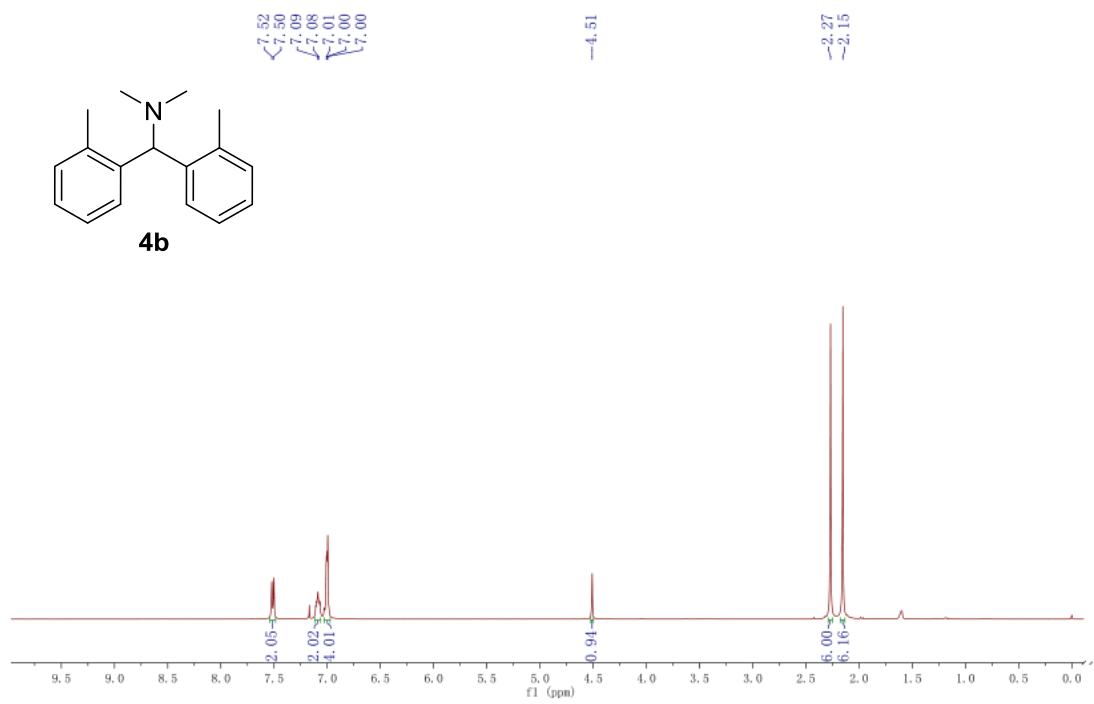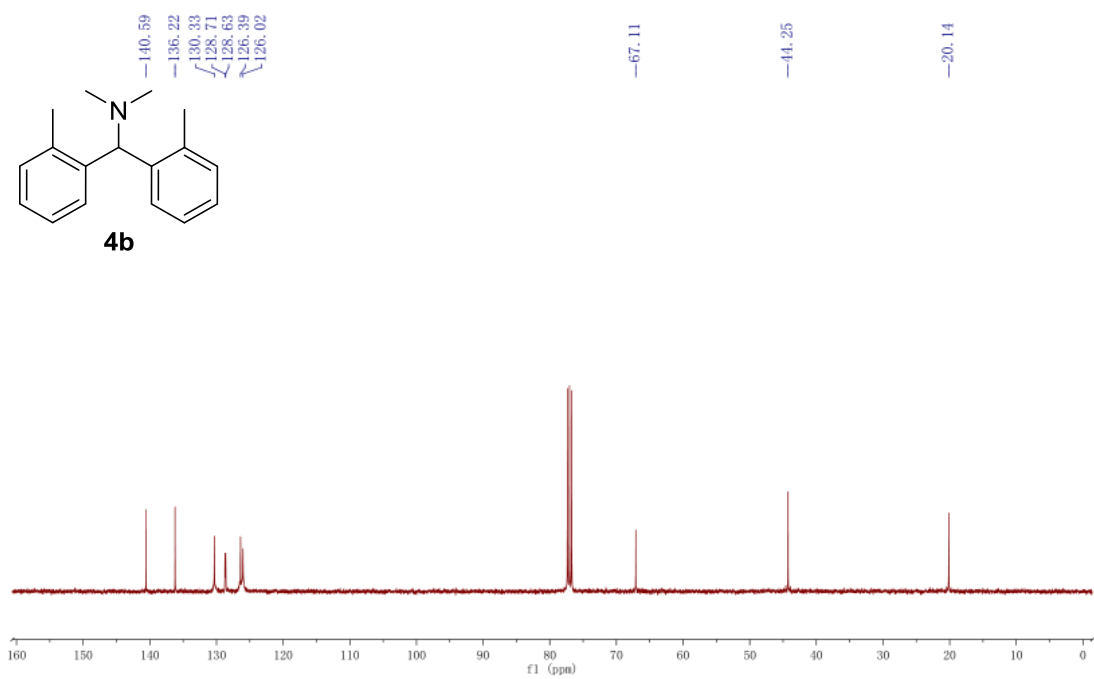



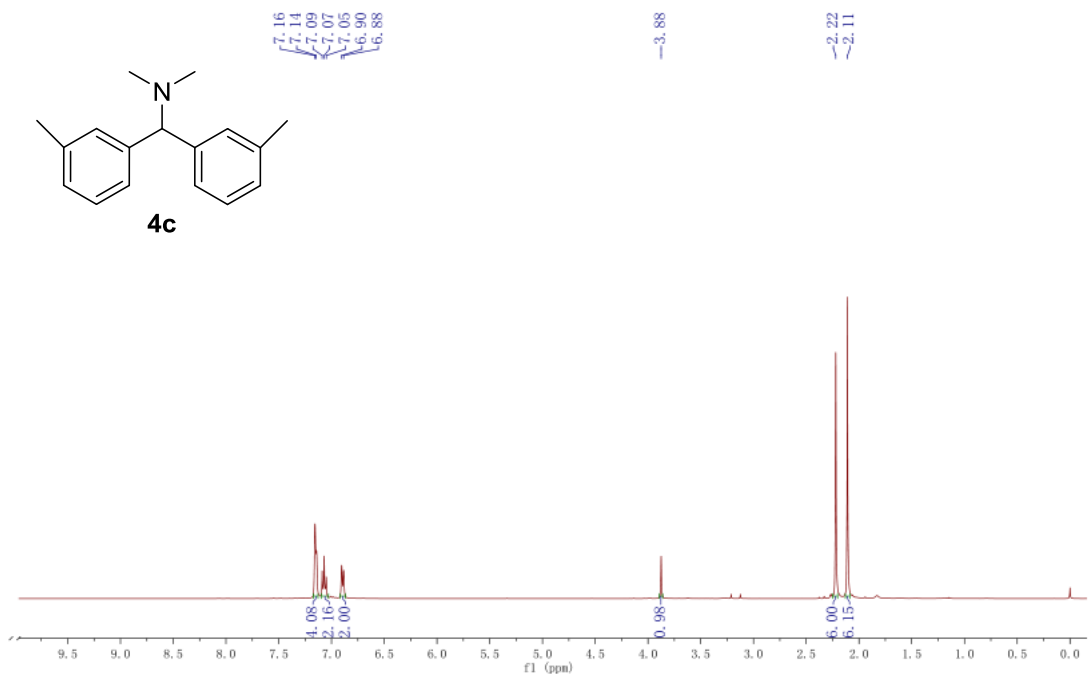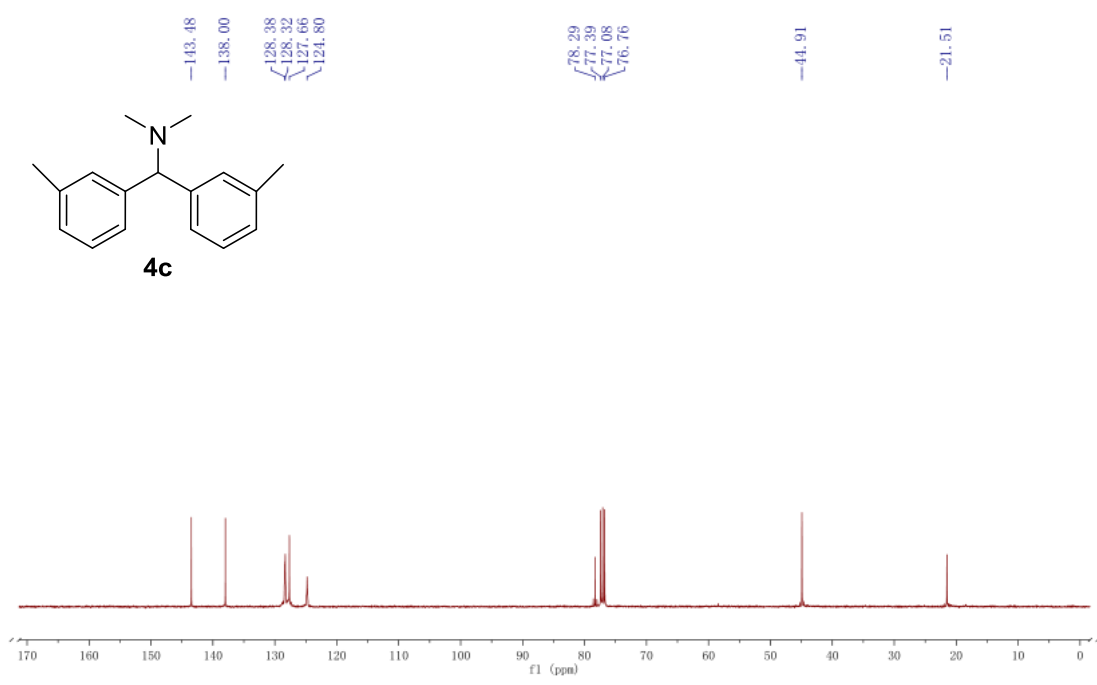

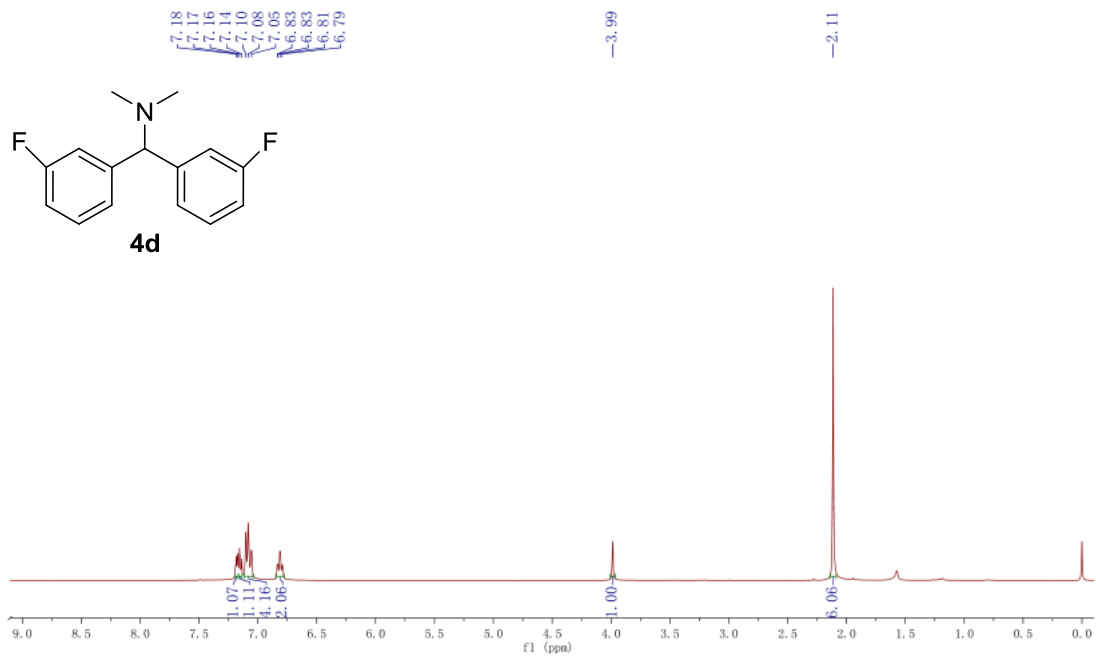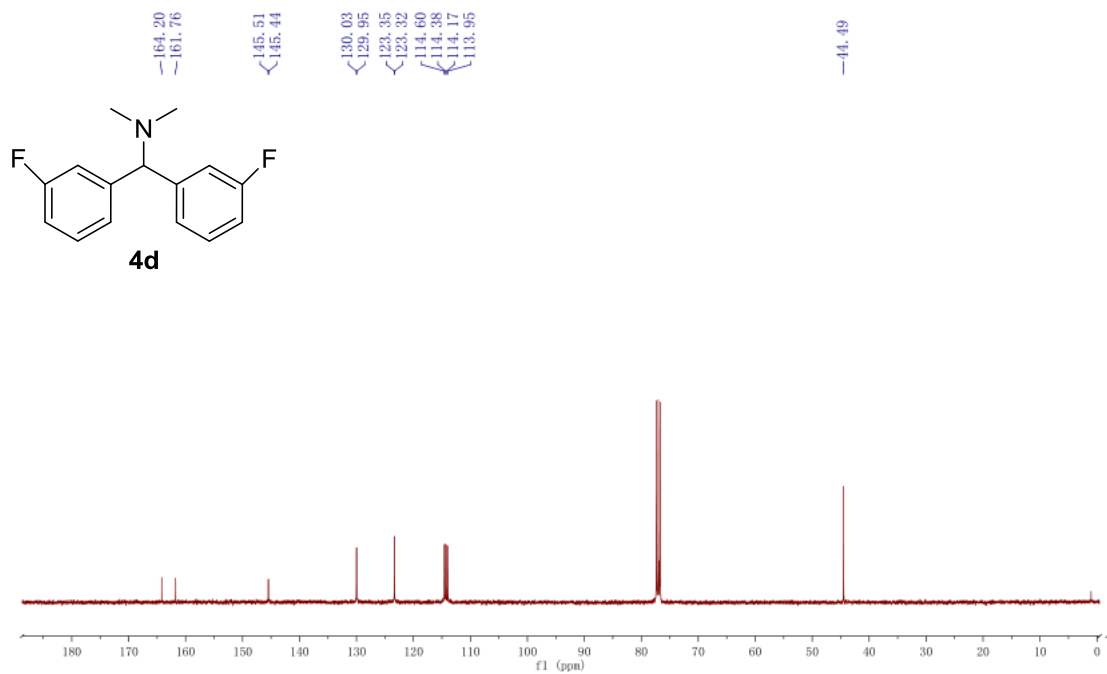

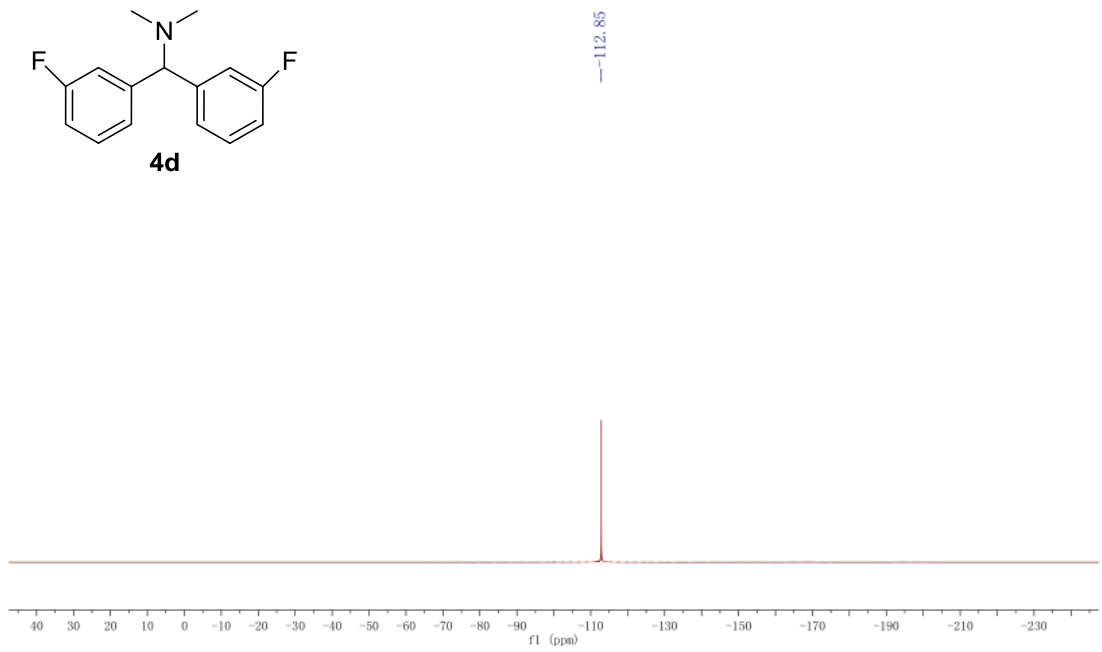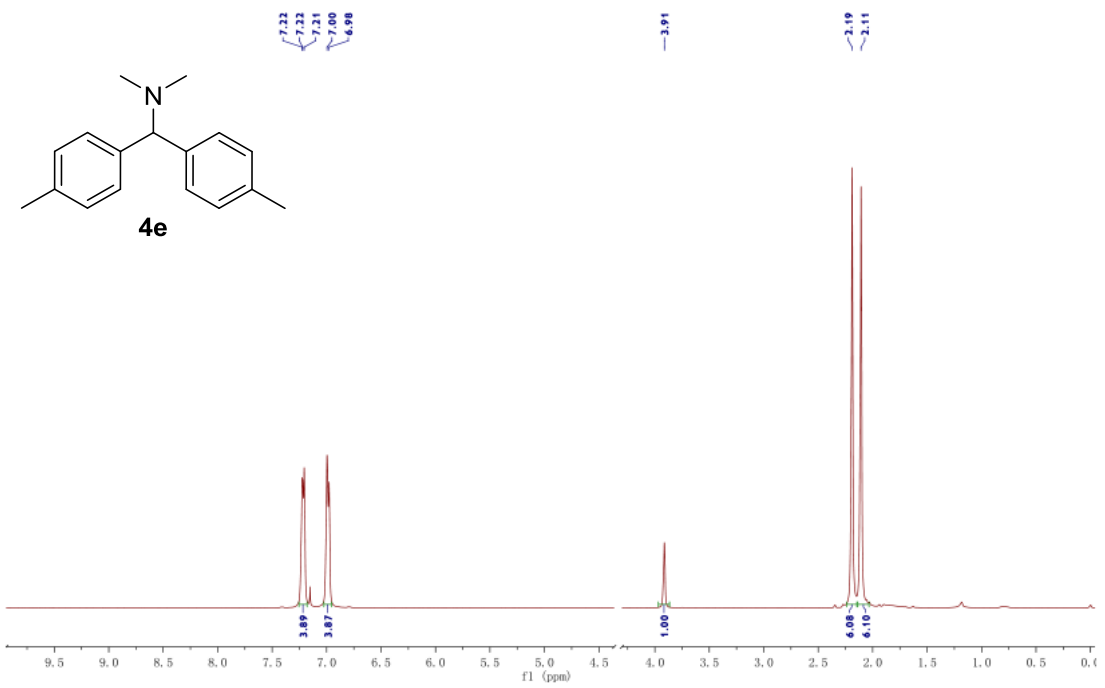

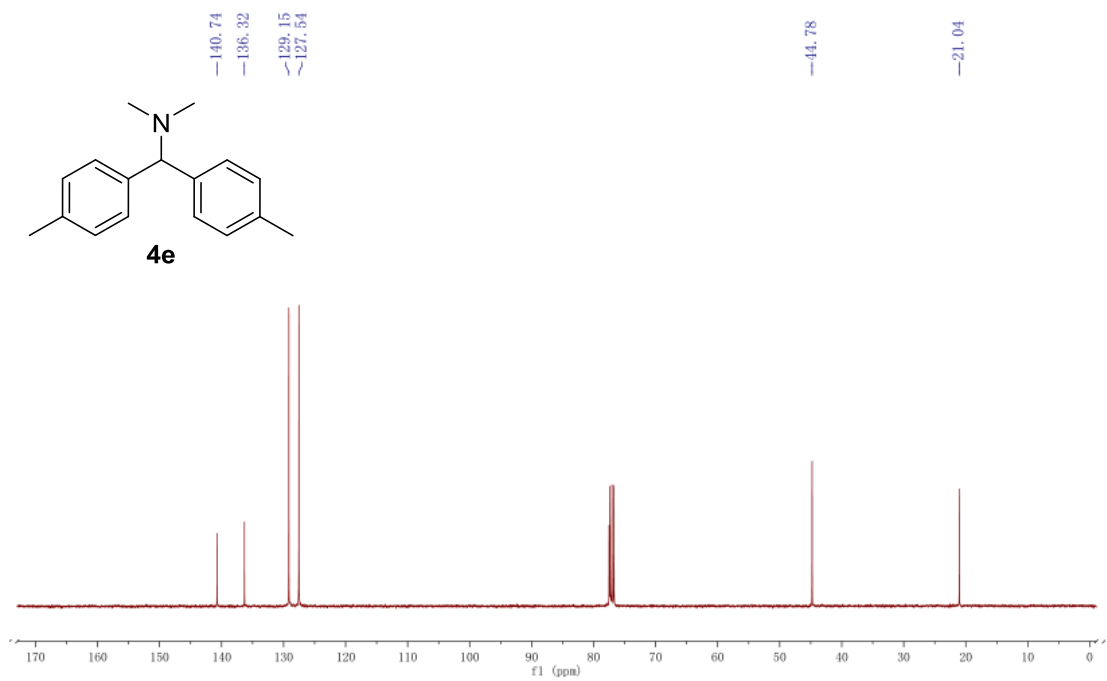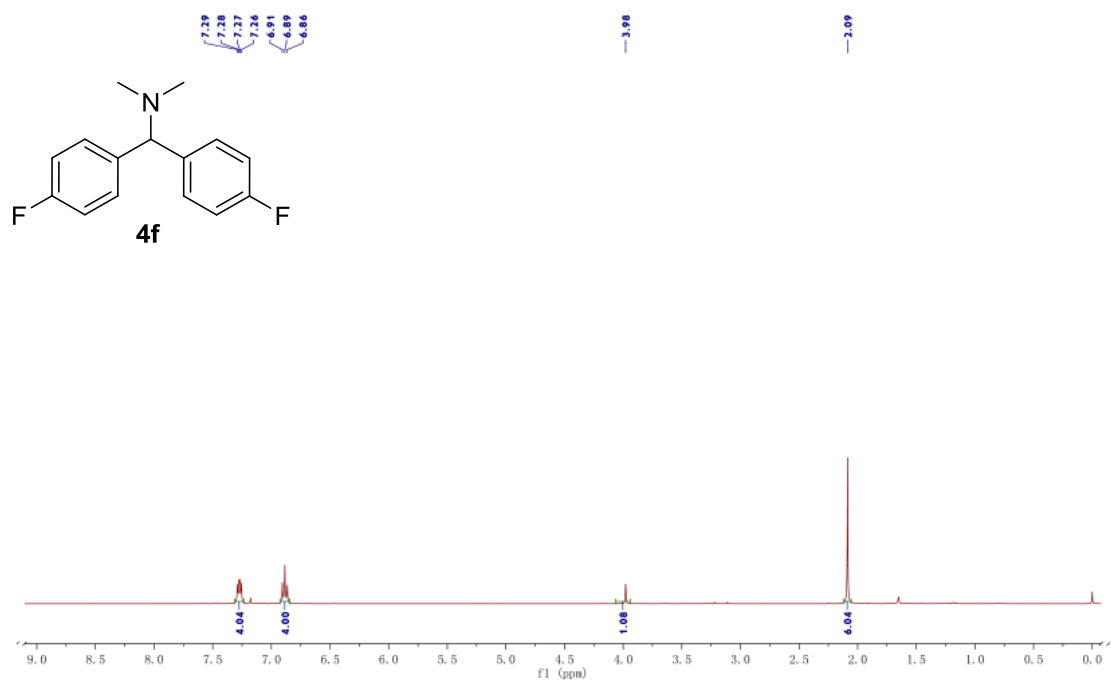

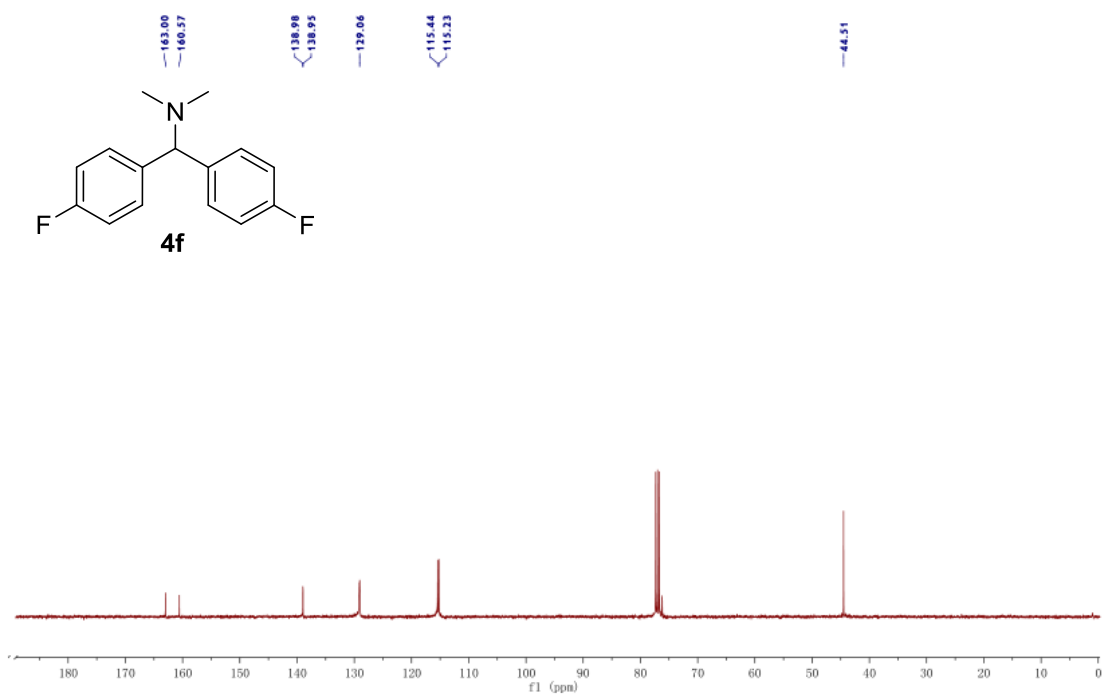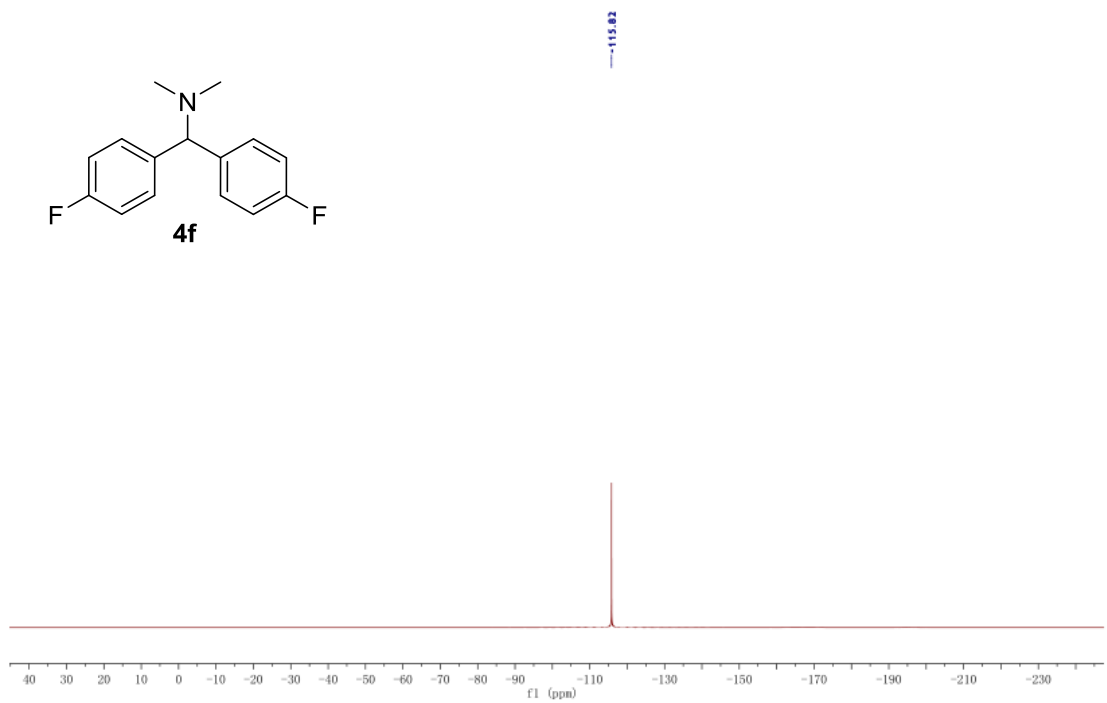

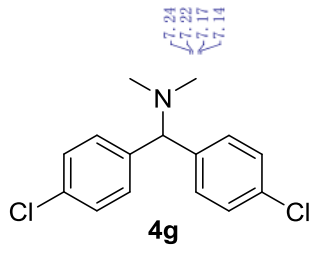

-3.95

-2.07

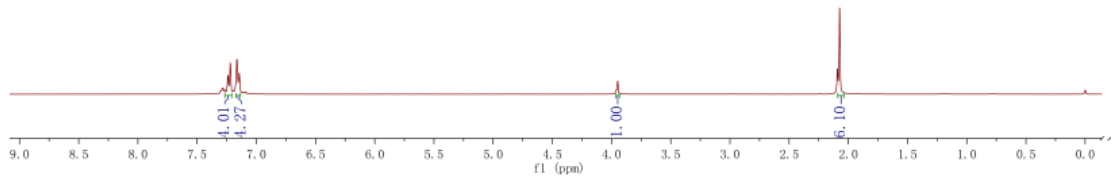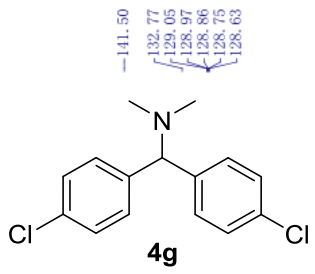

-44.48

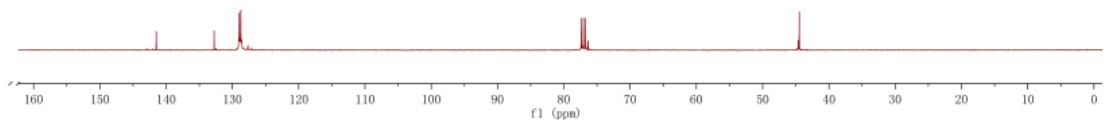

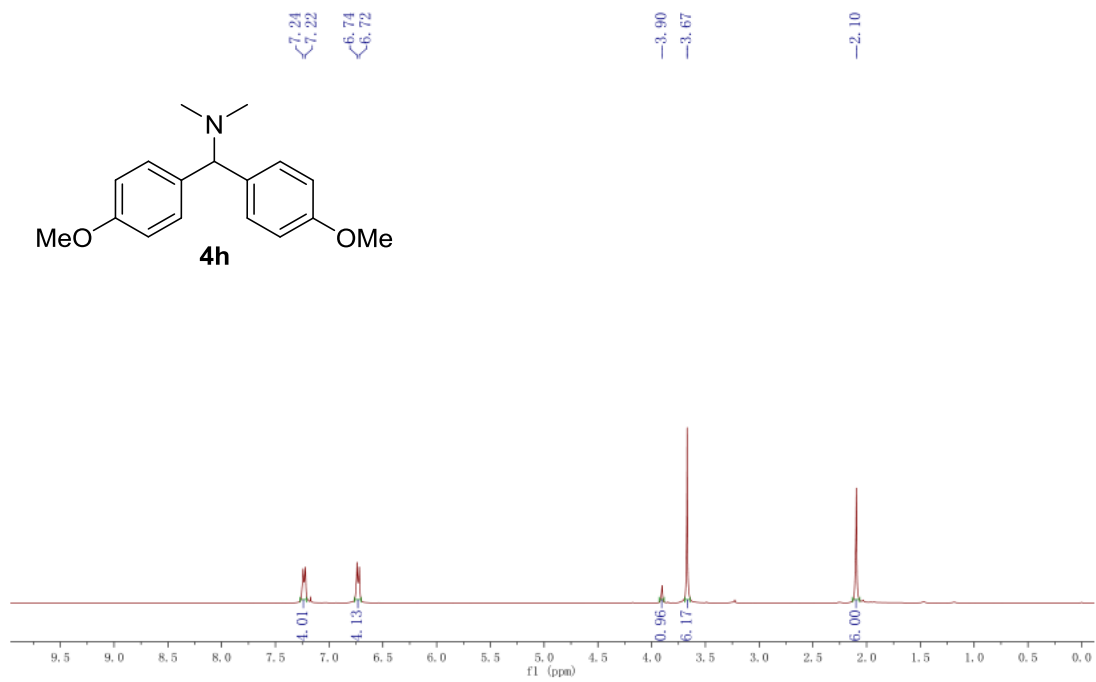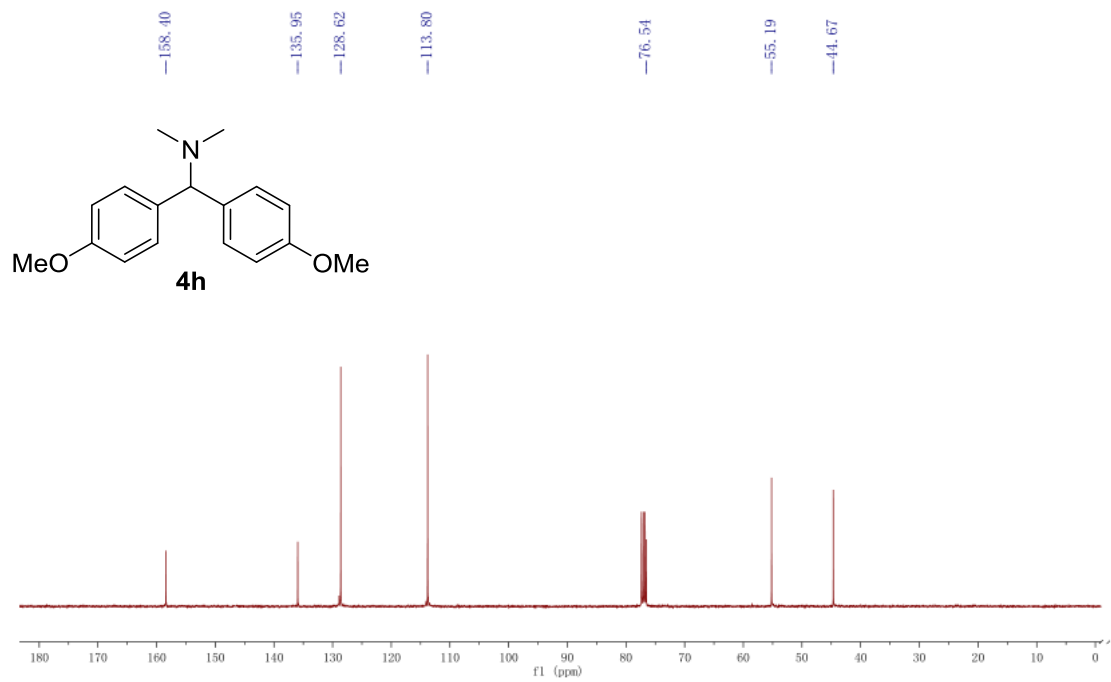

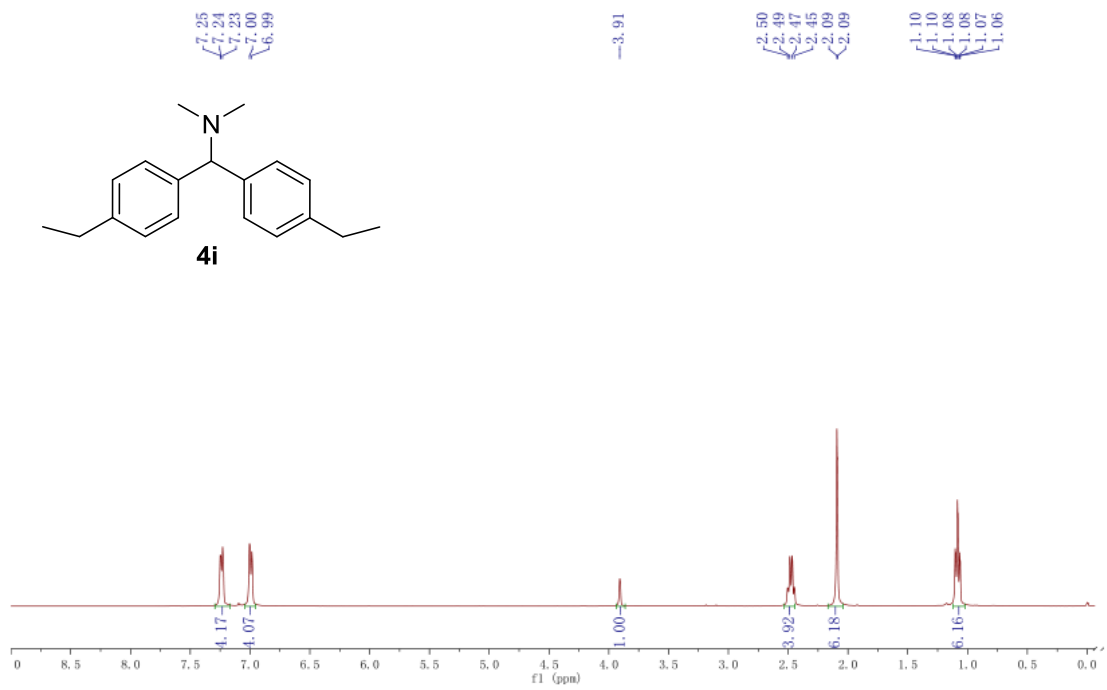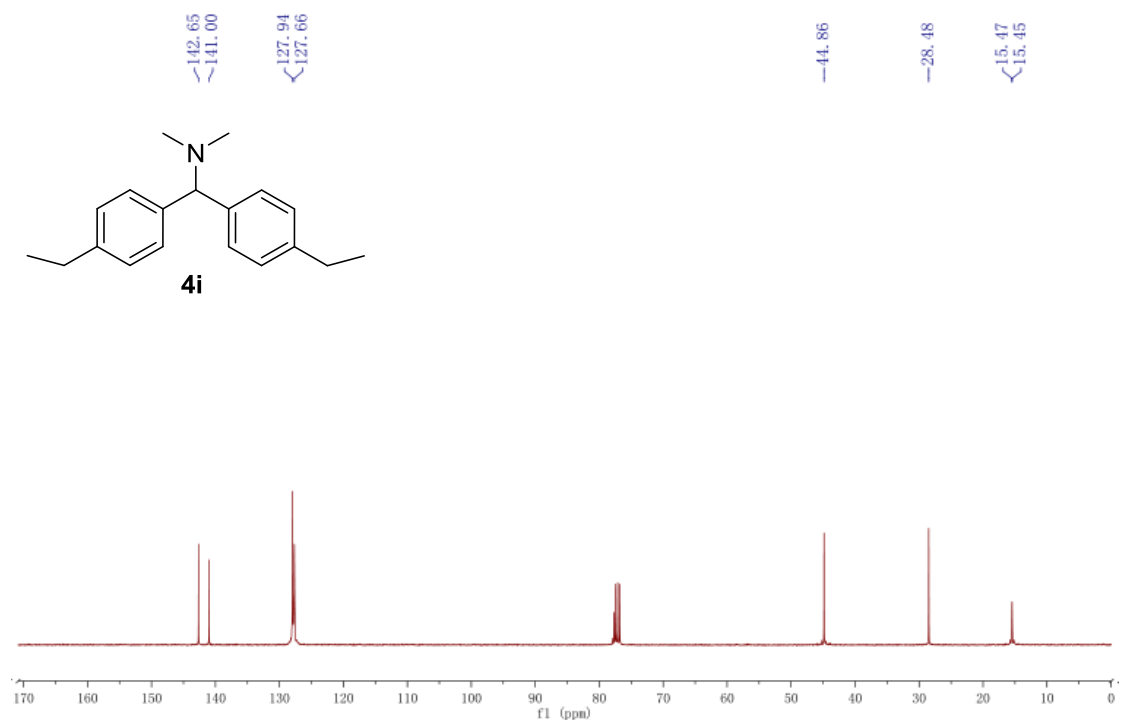



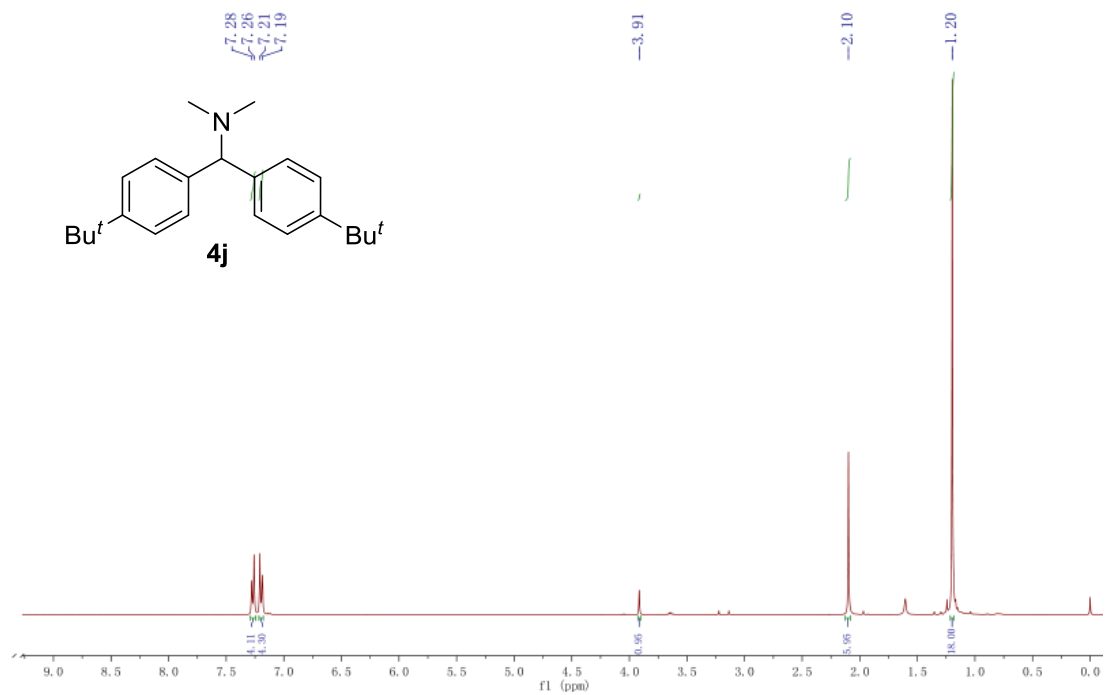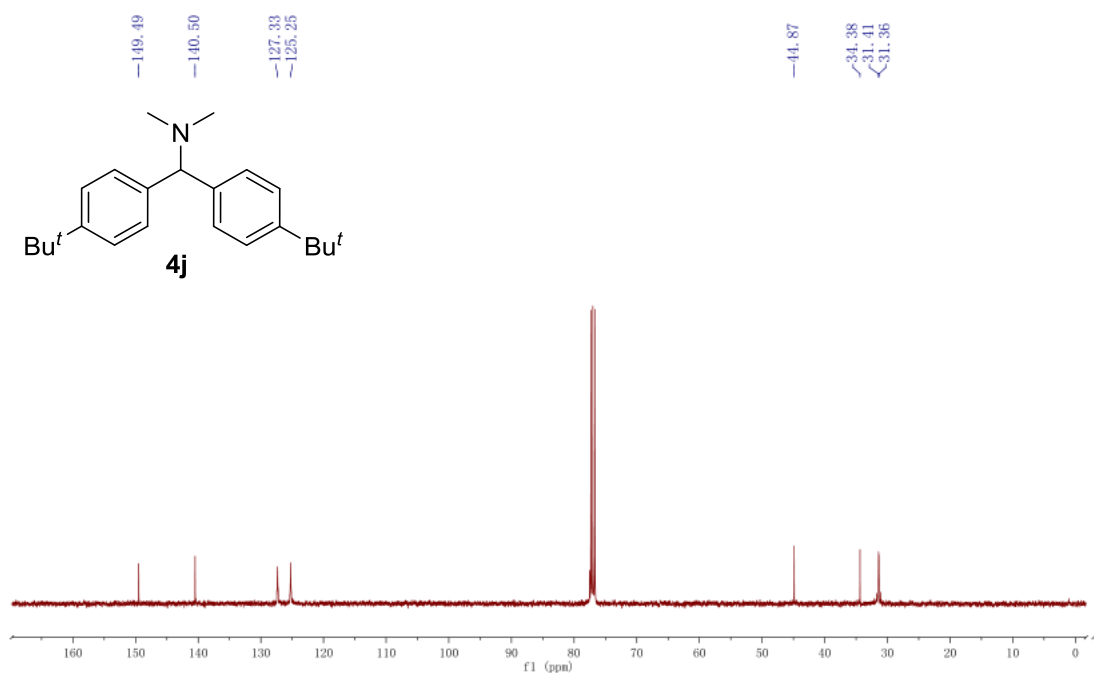

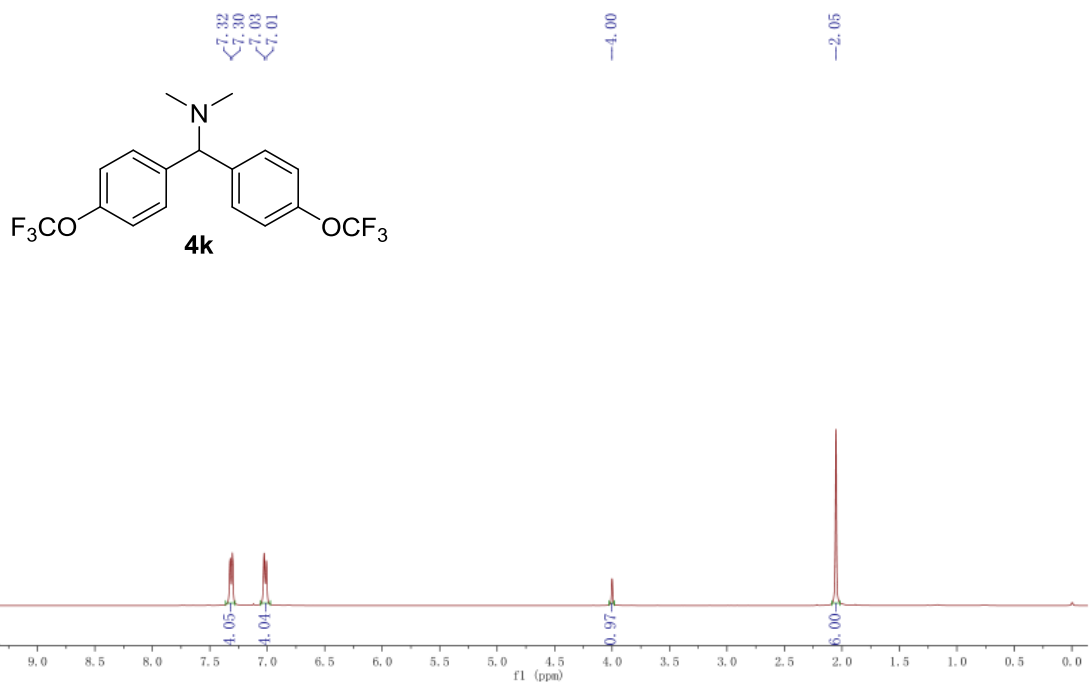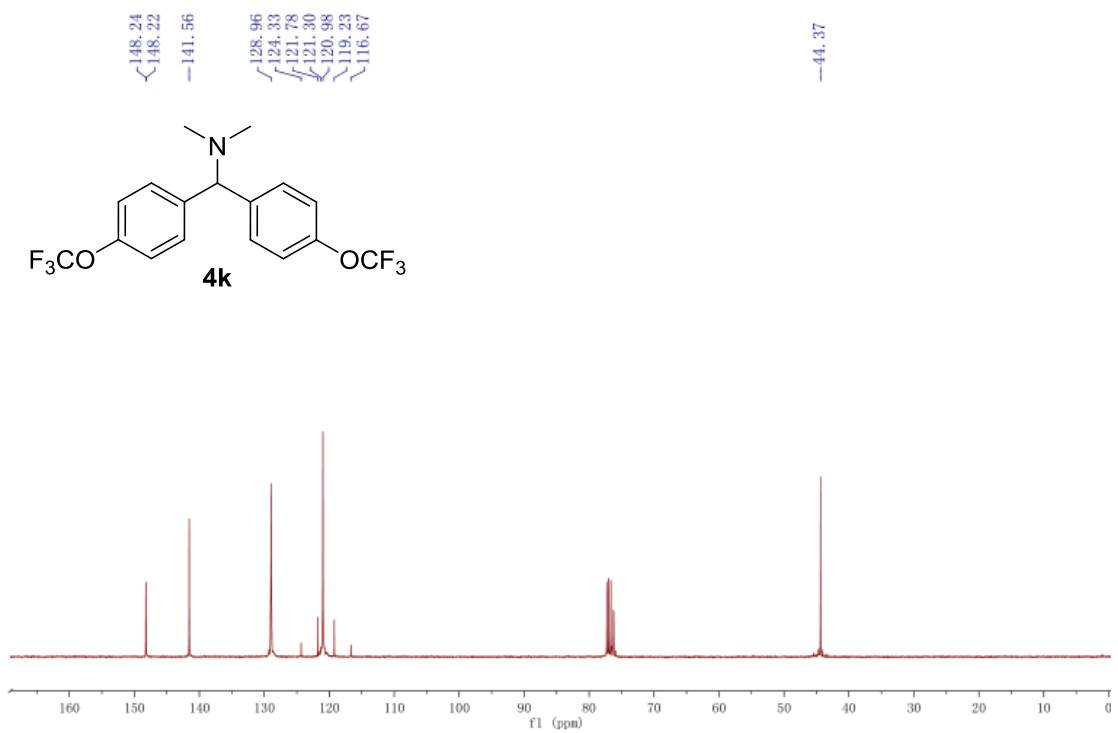

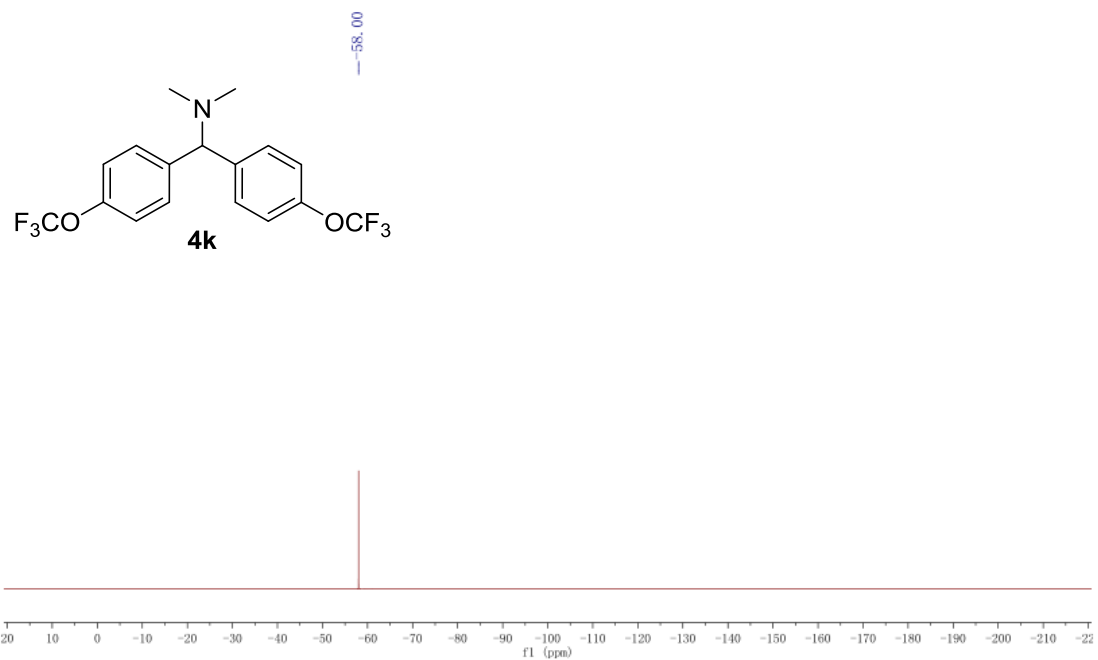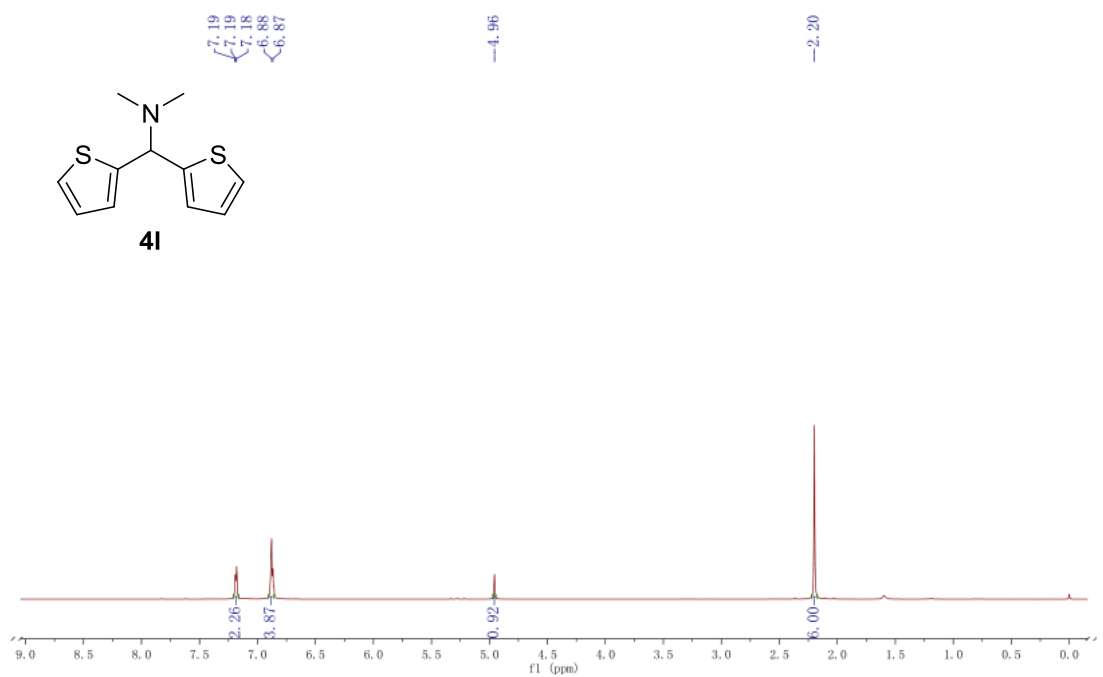

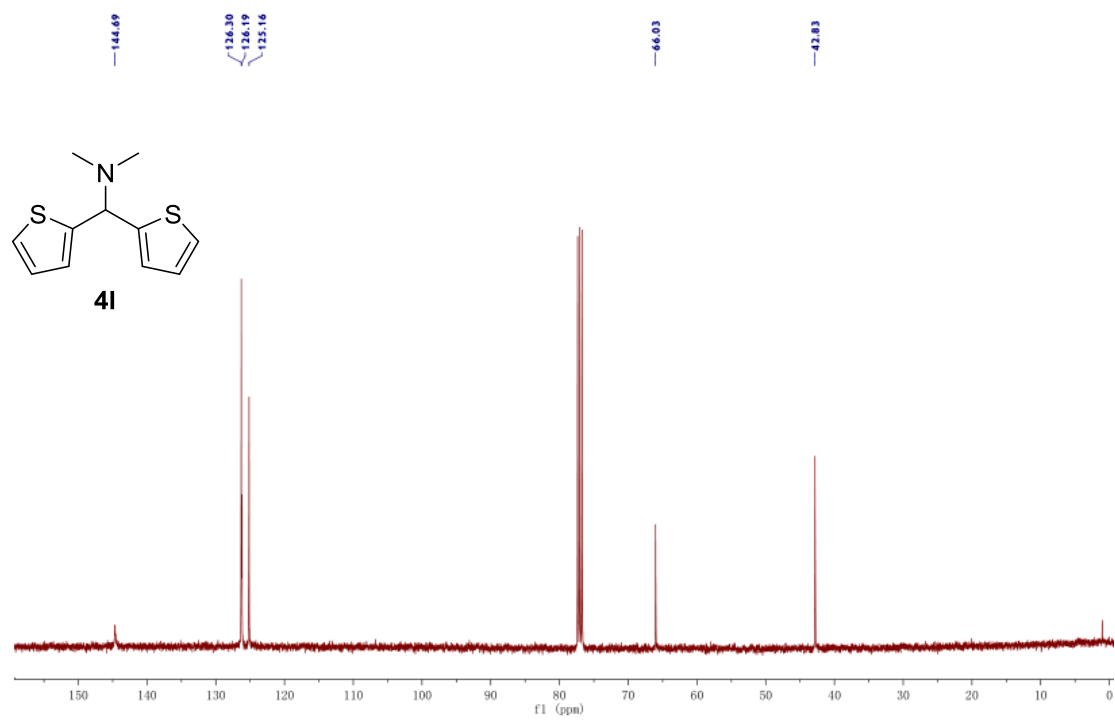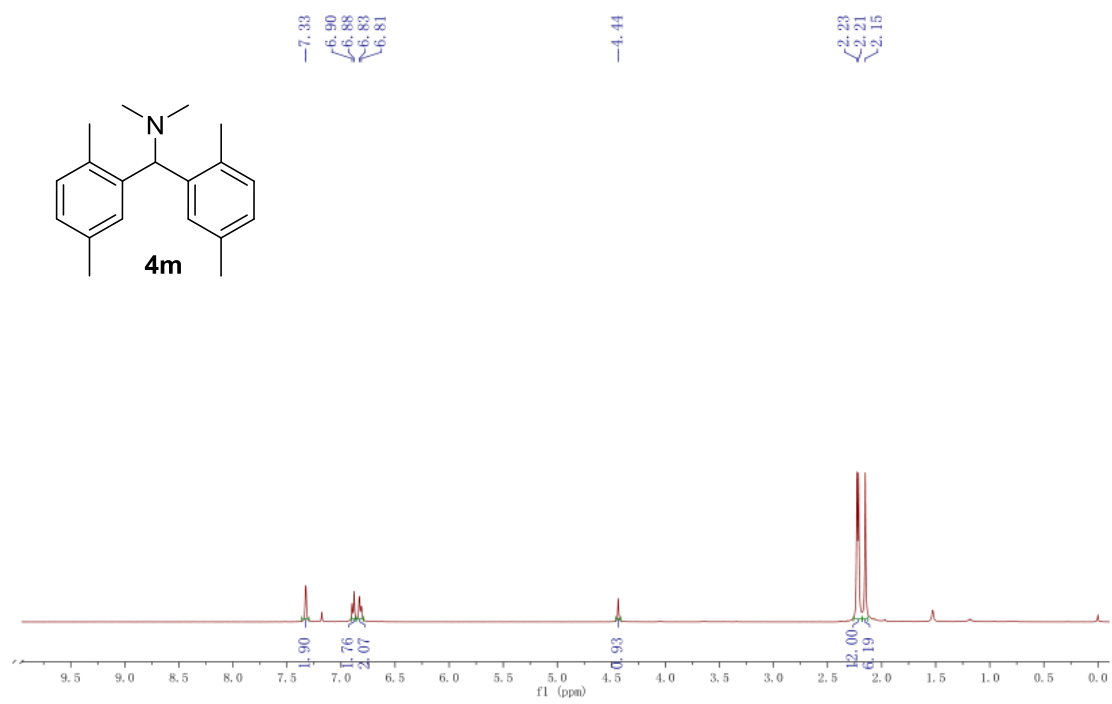

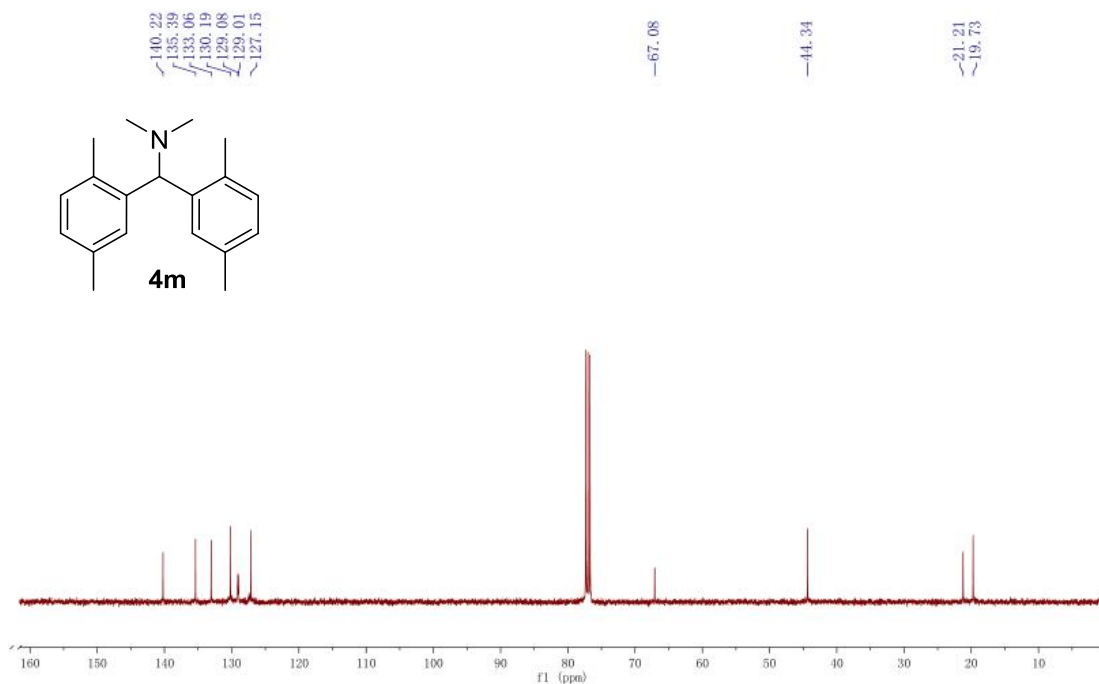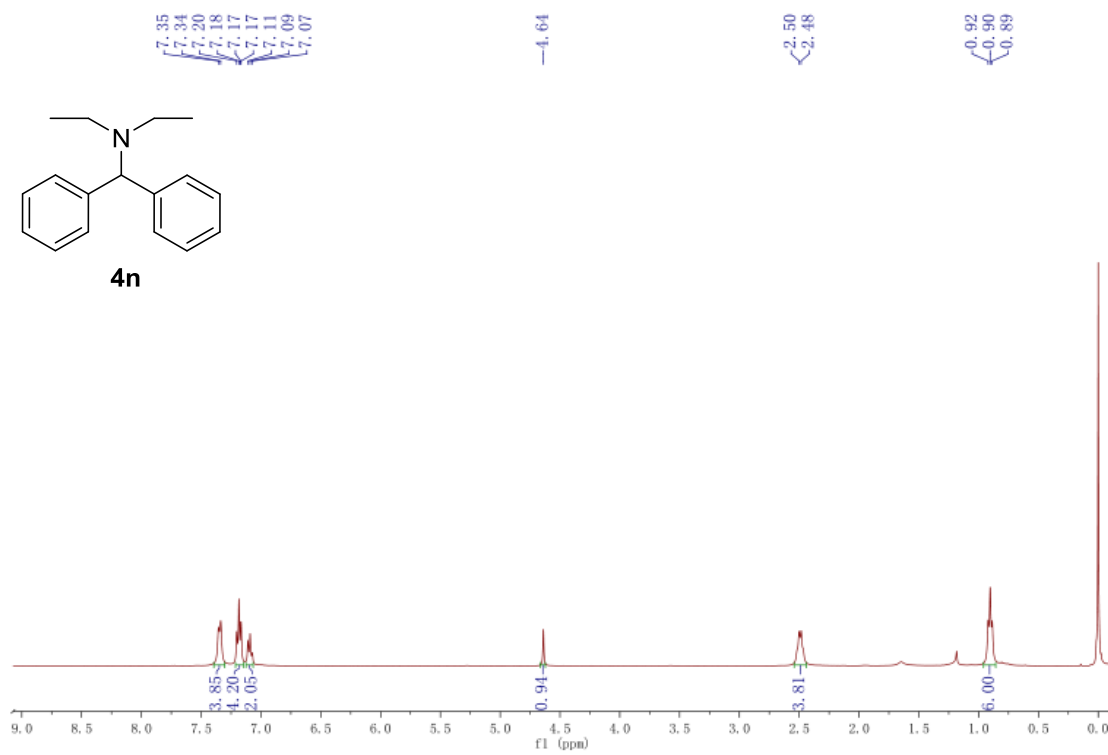

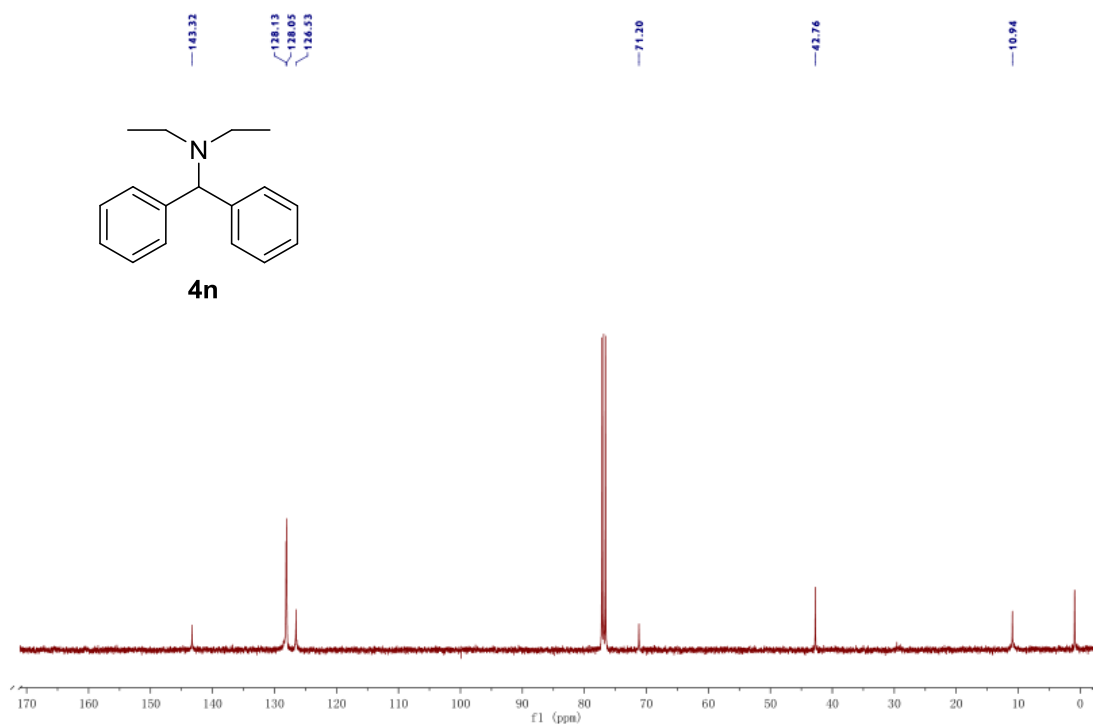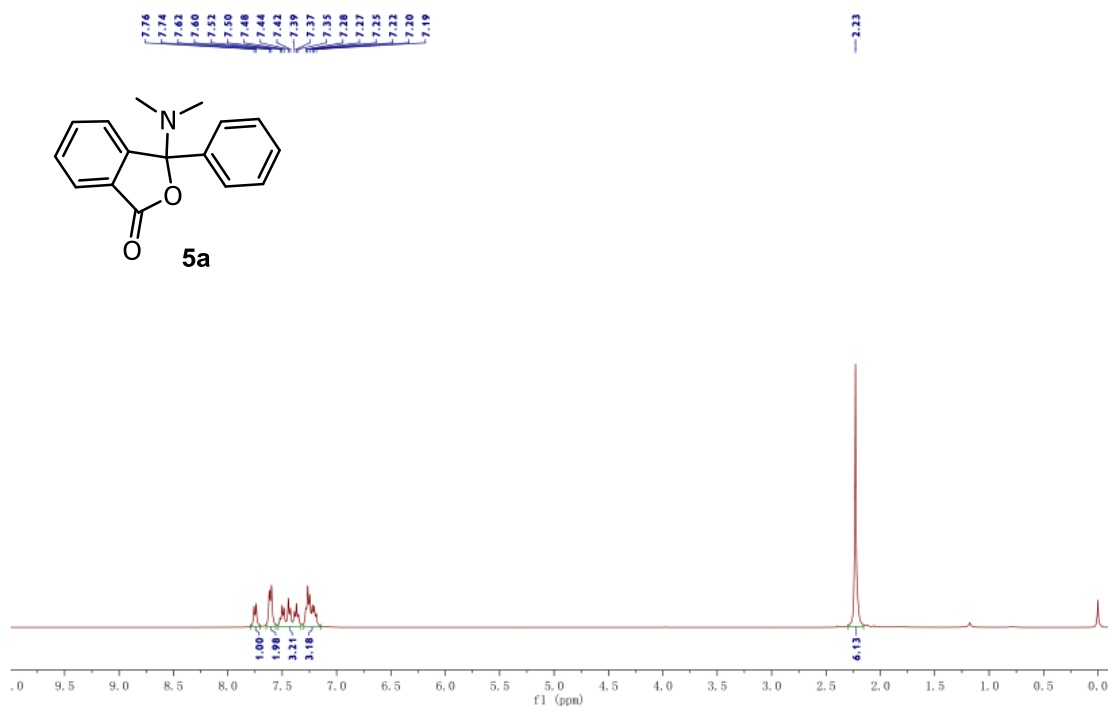

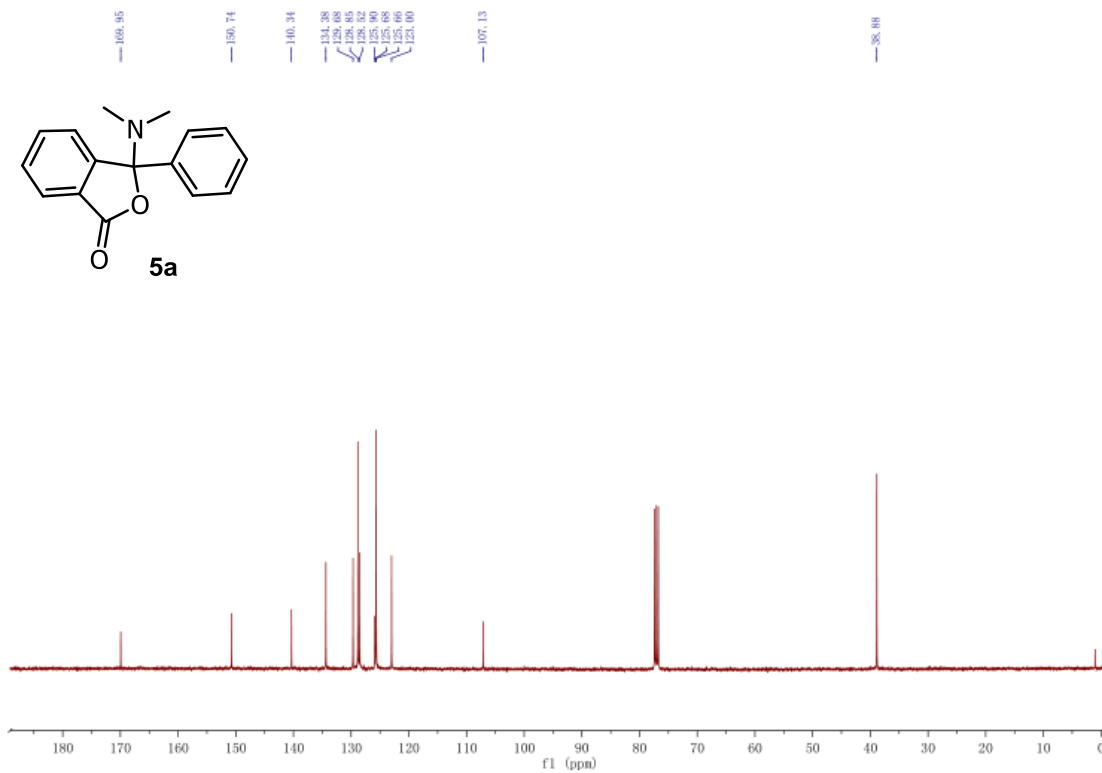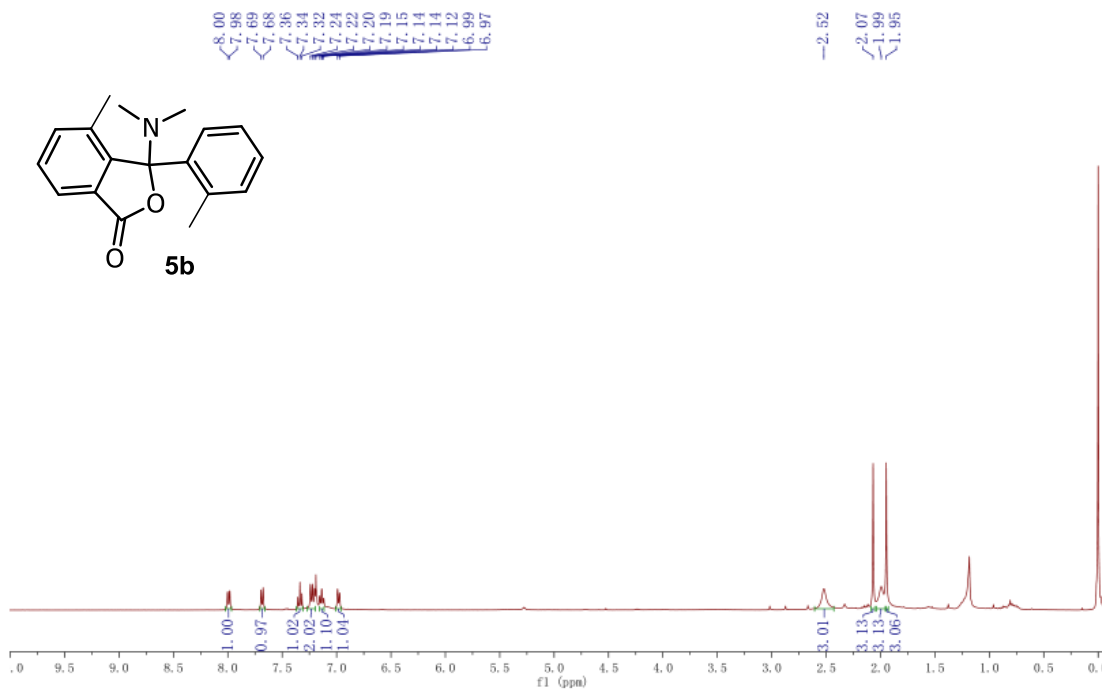

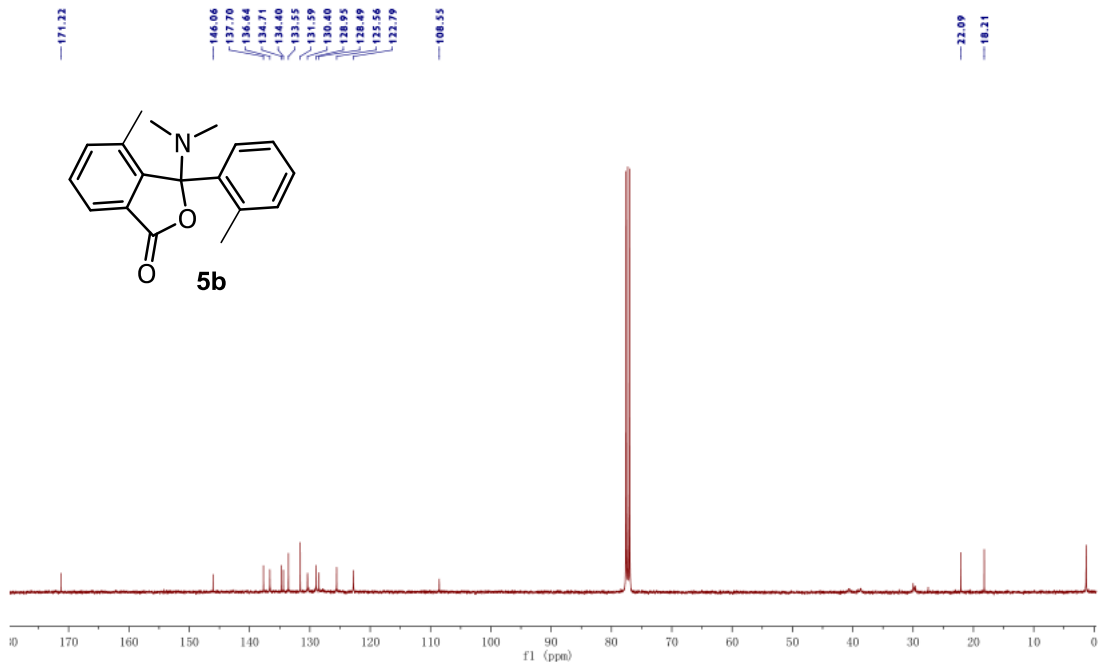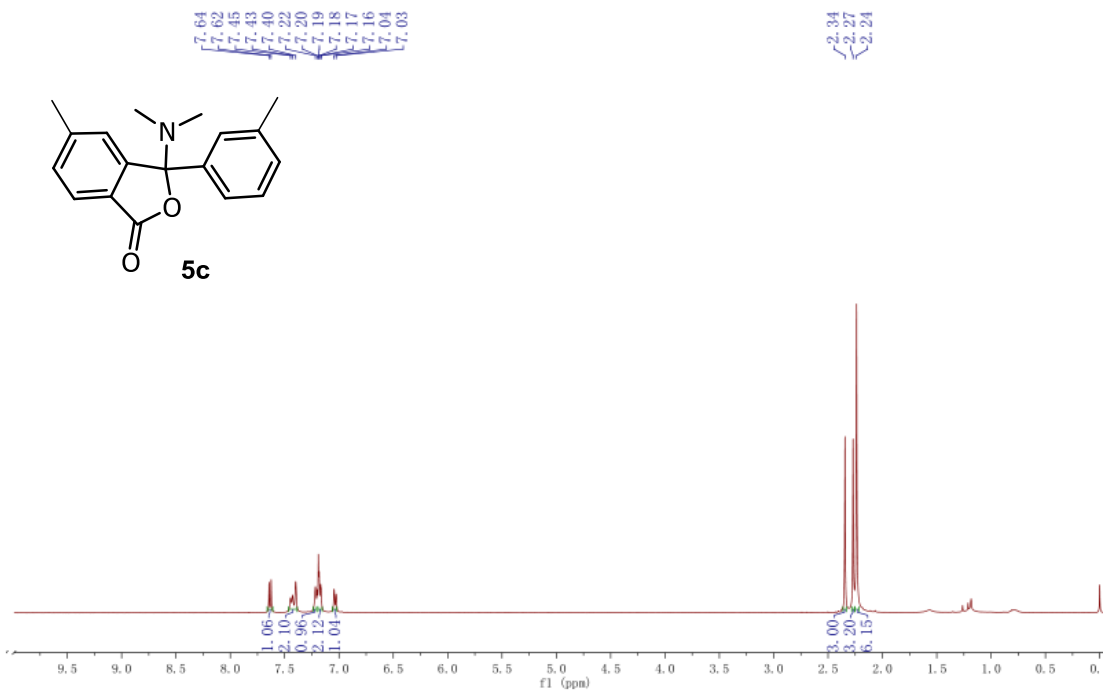



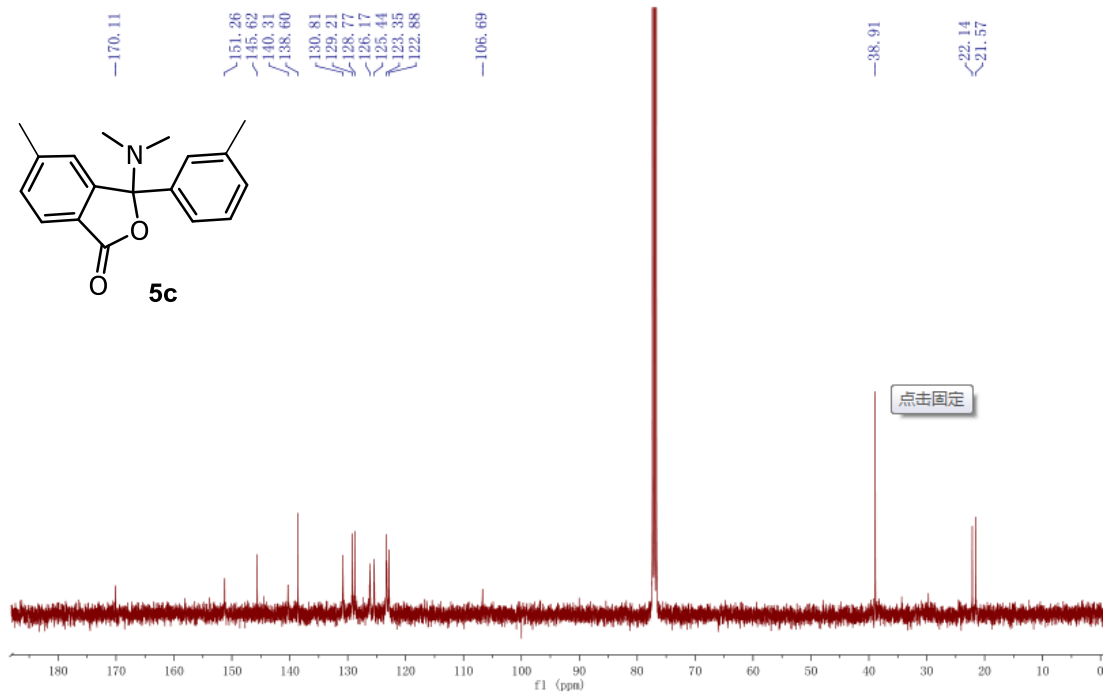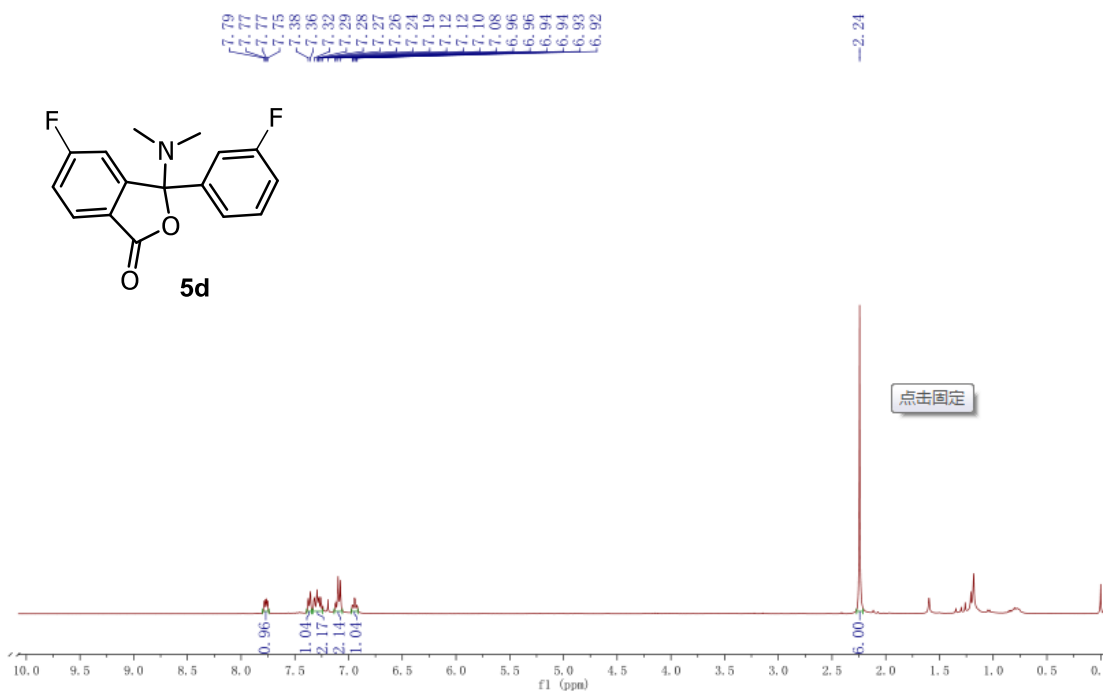

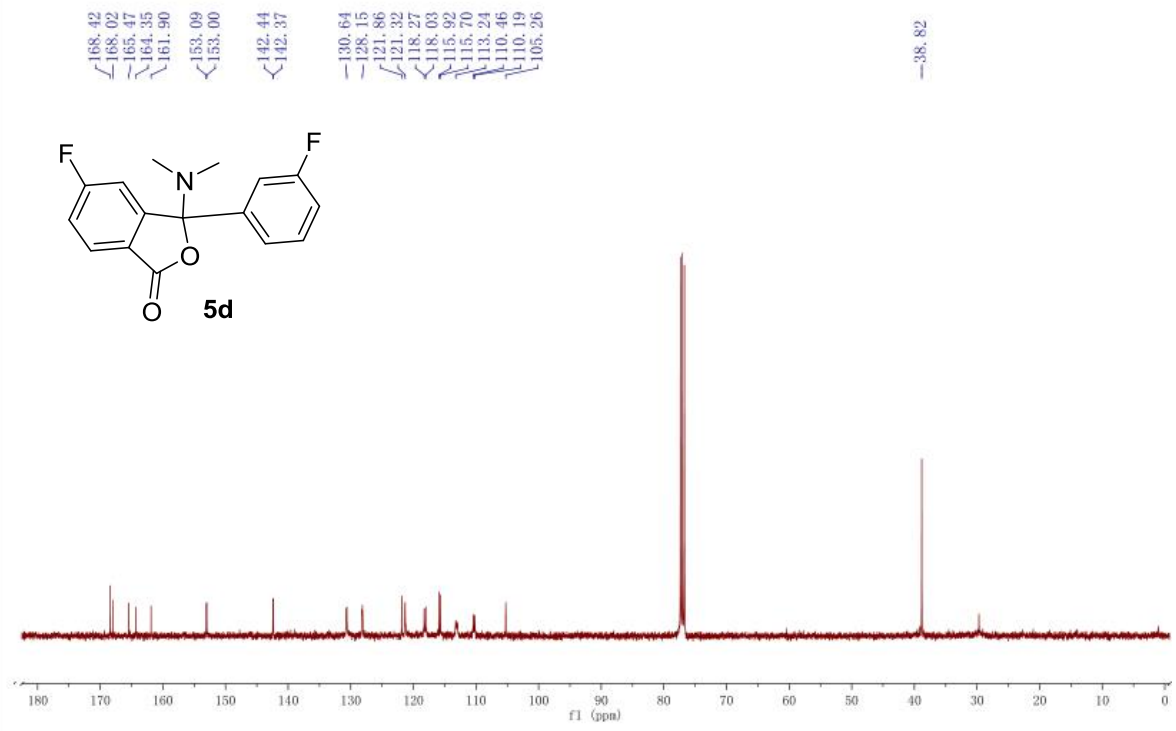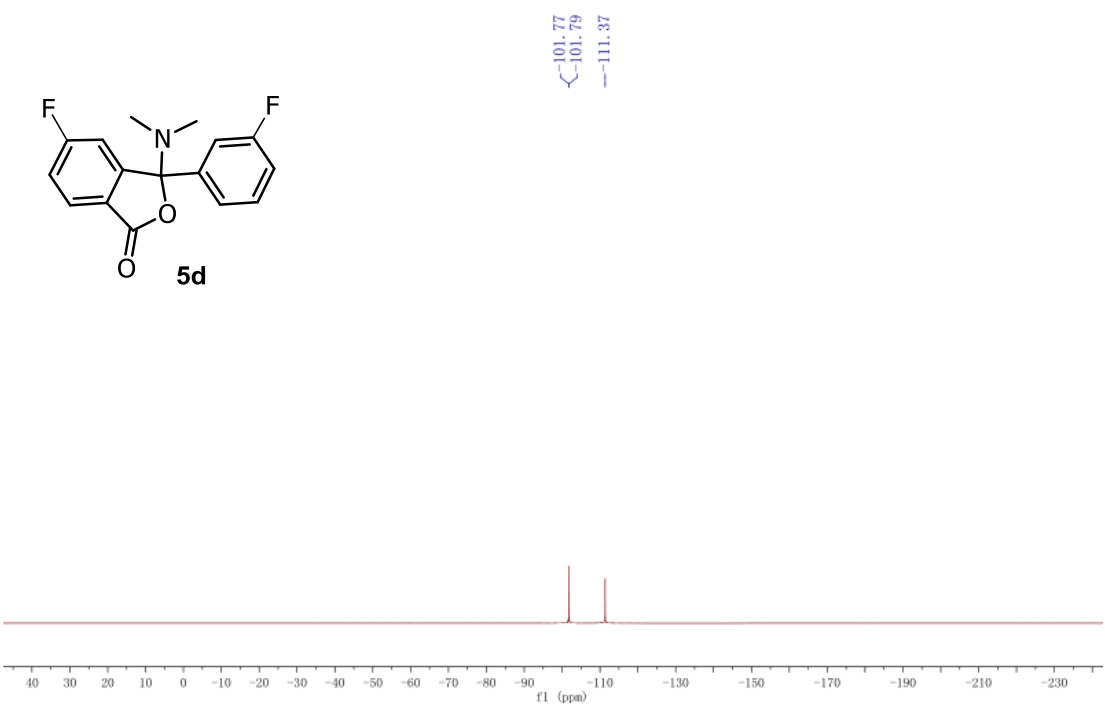

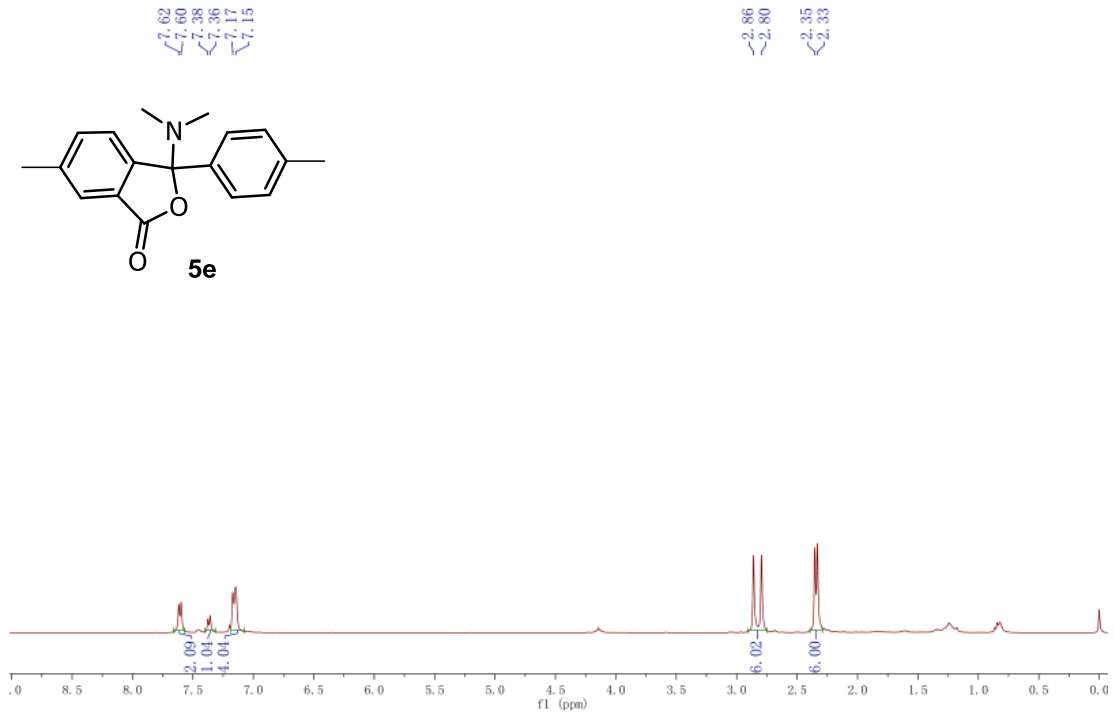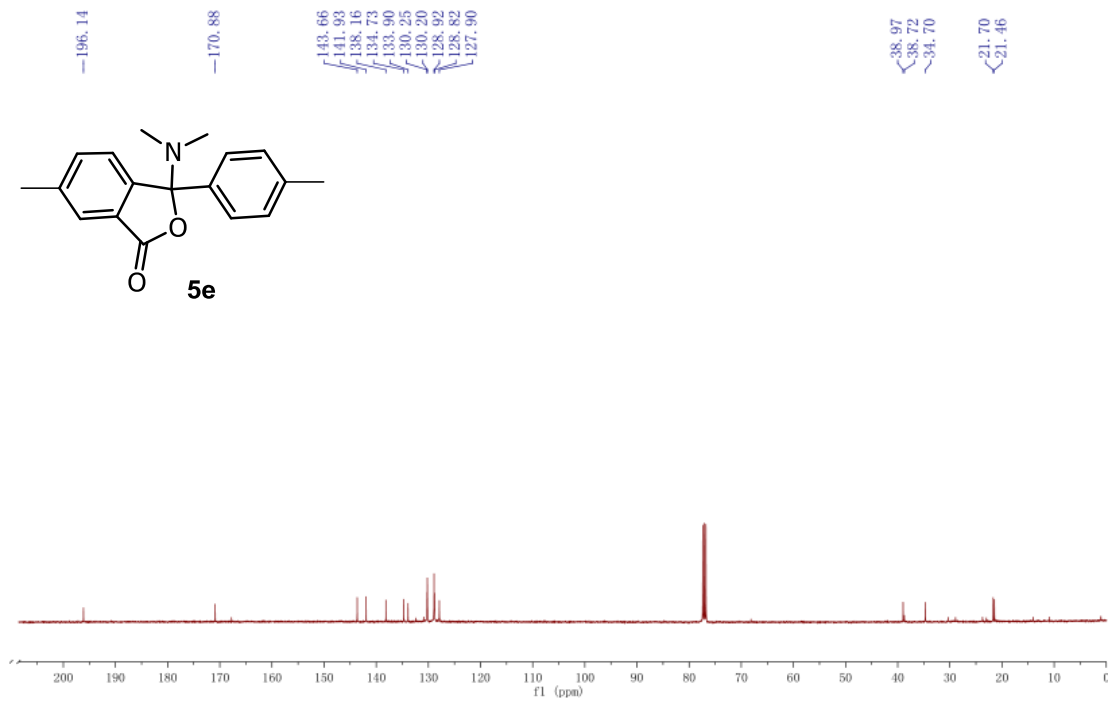

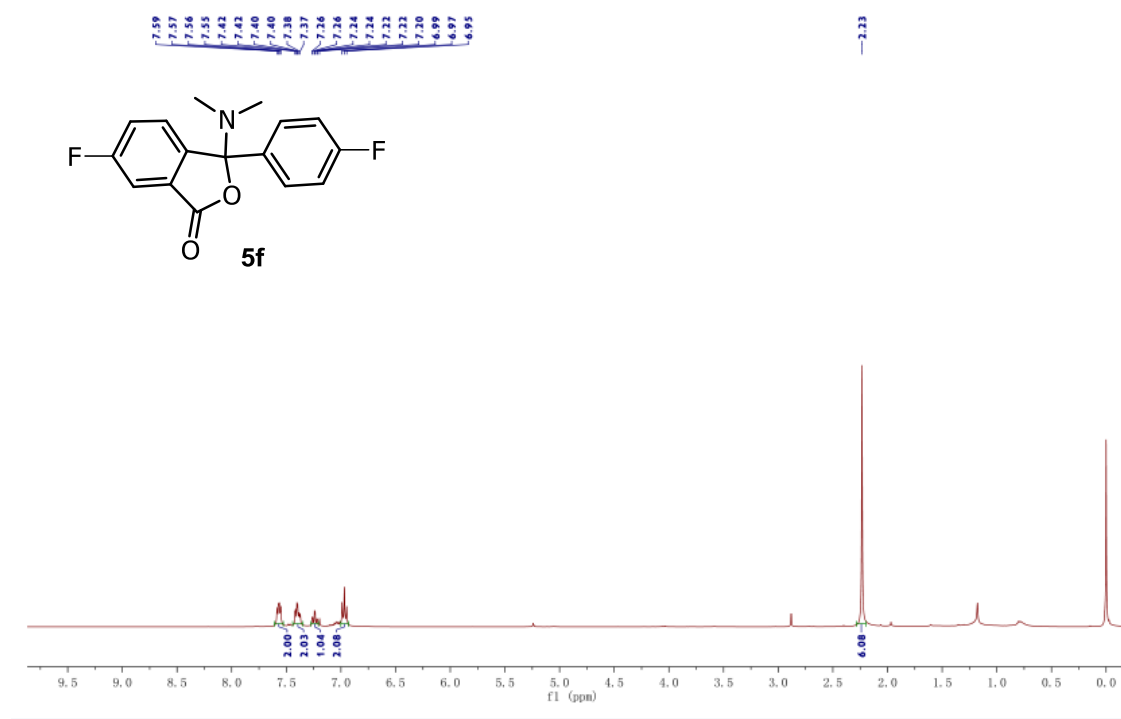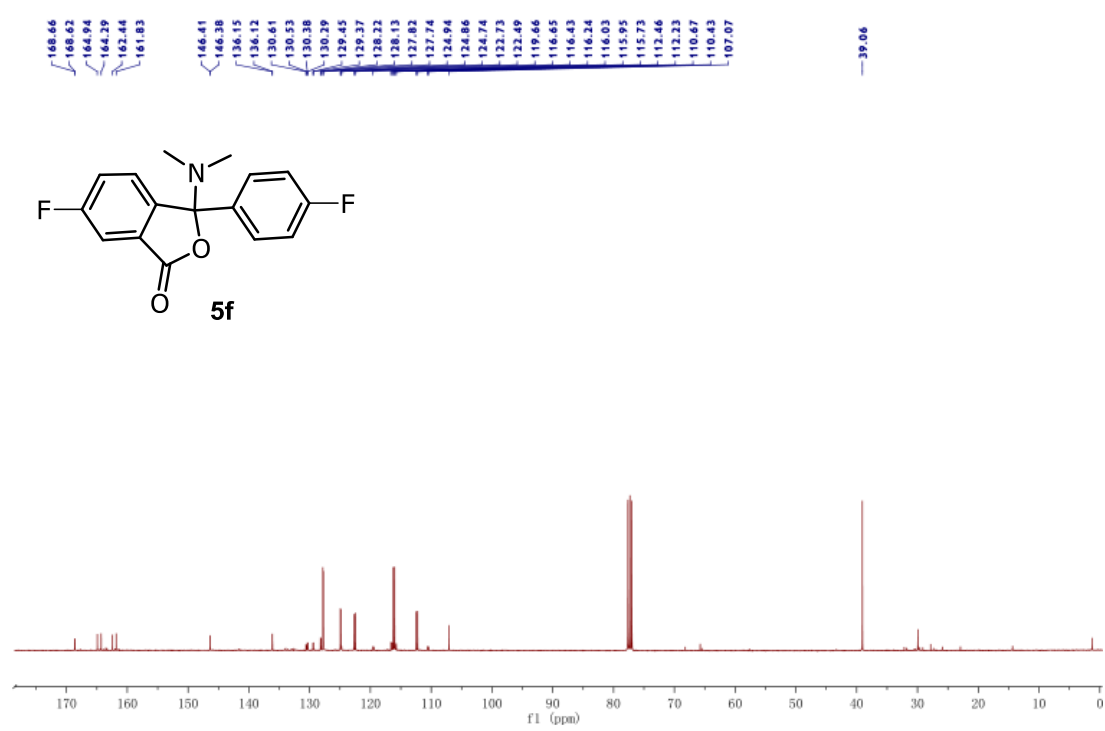

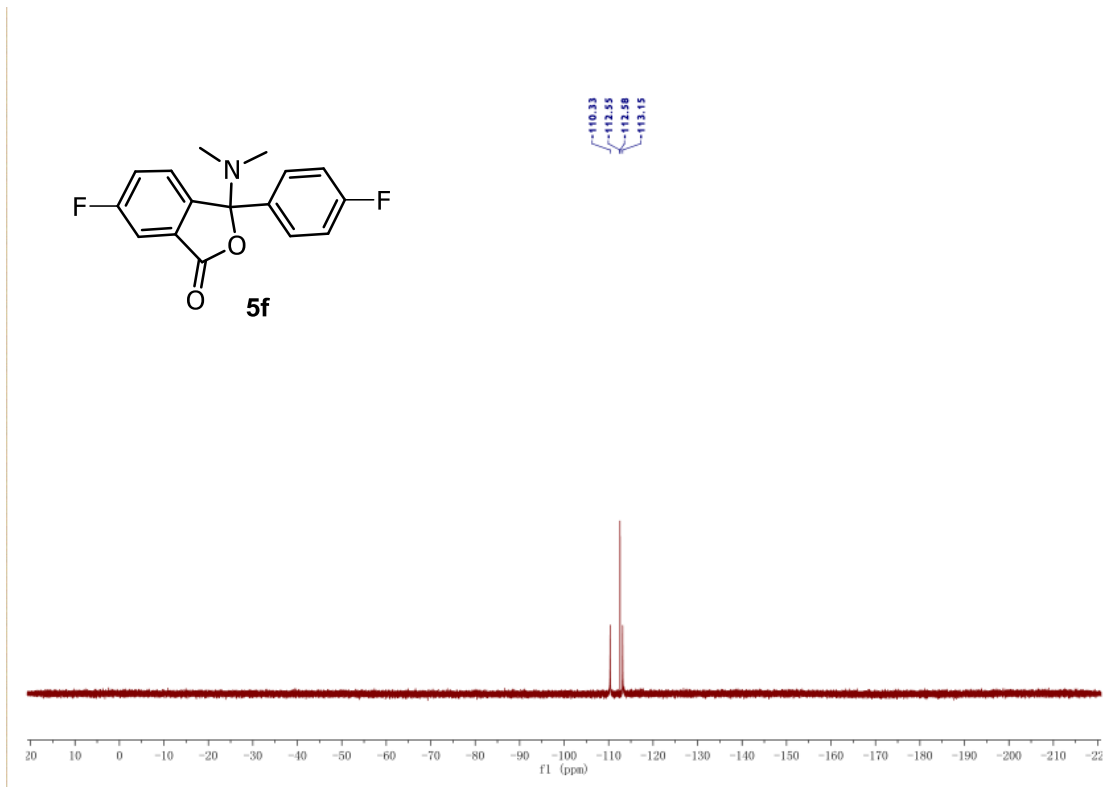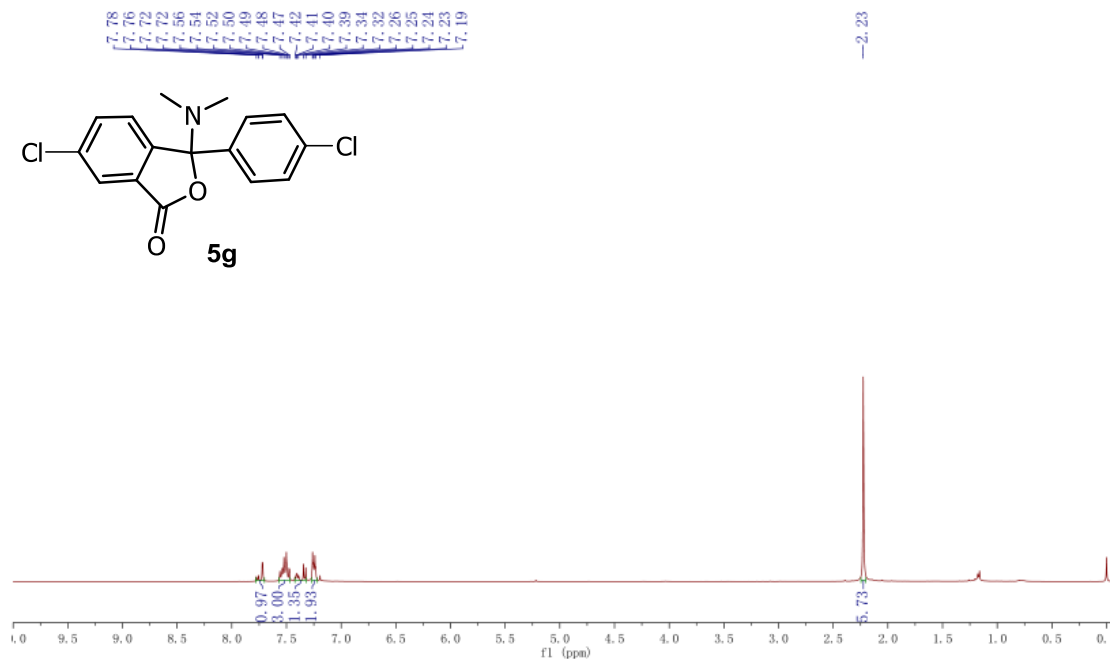

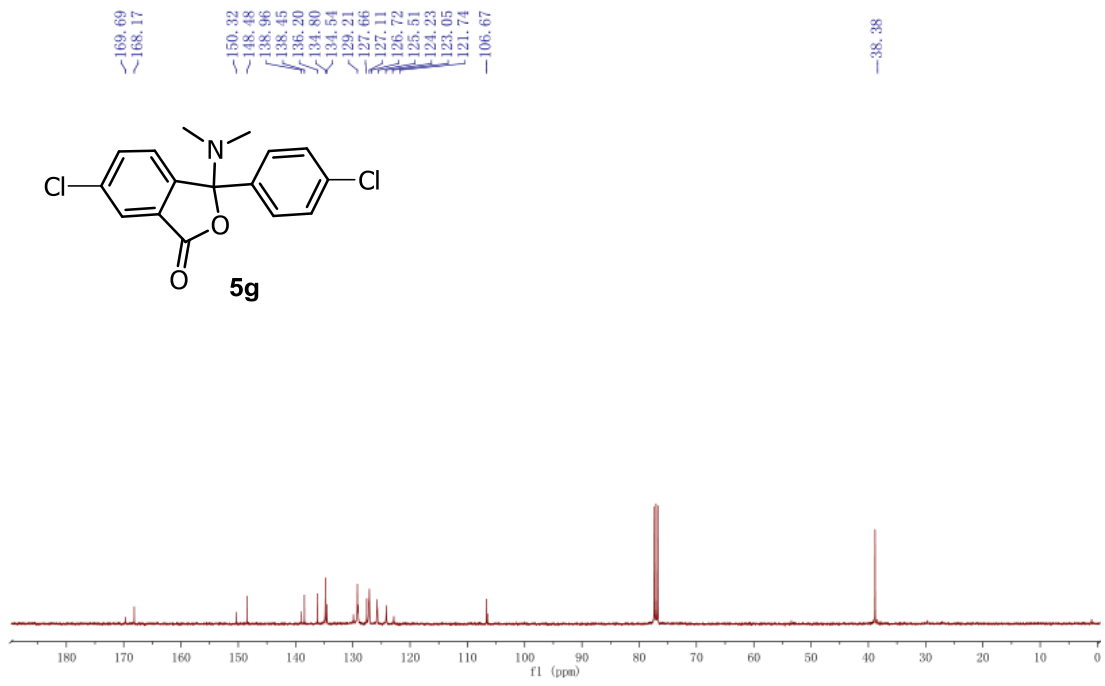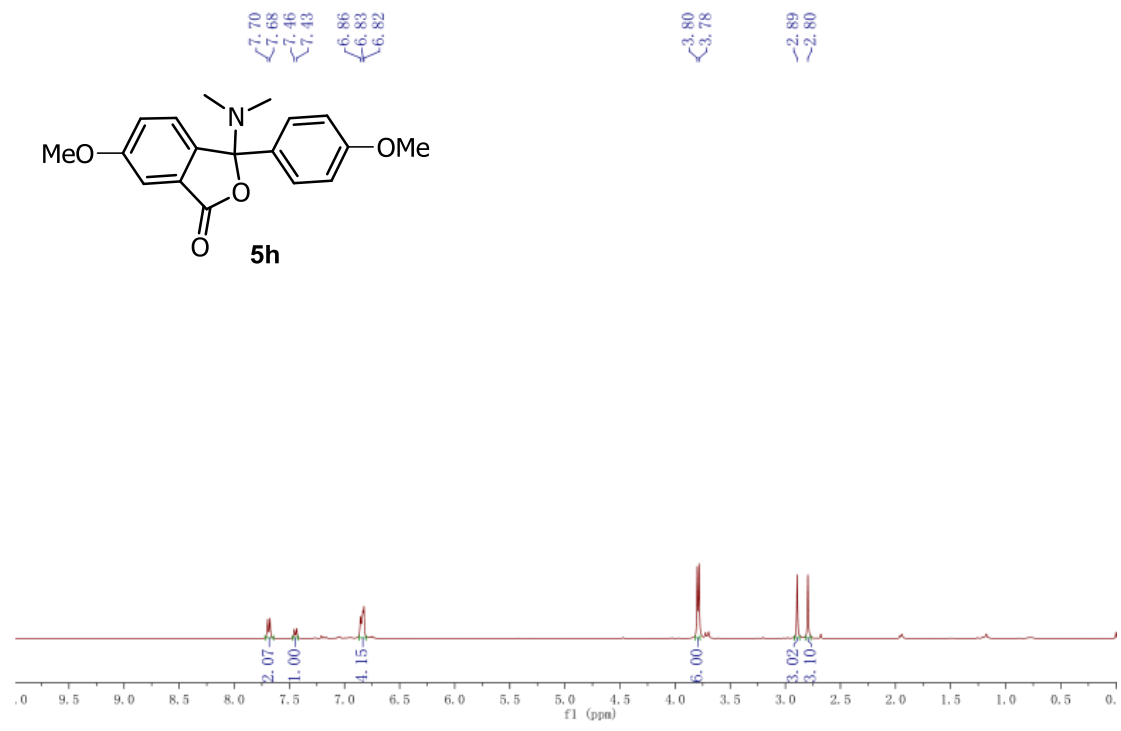

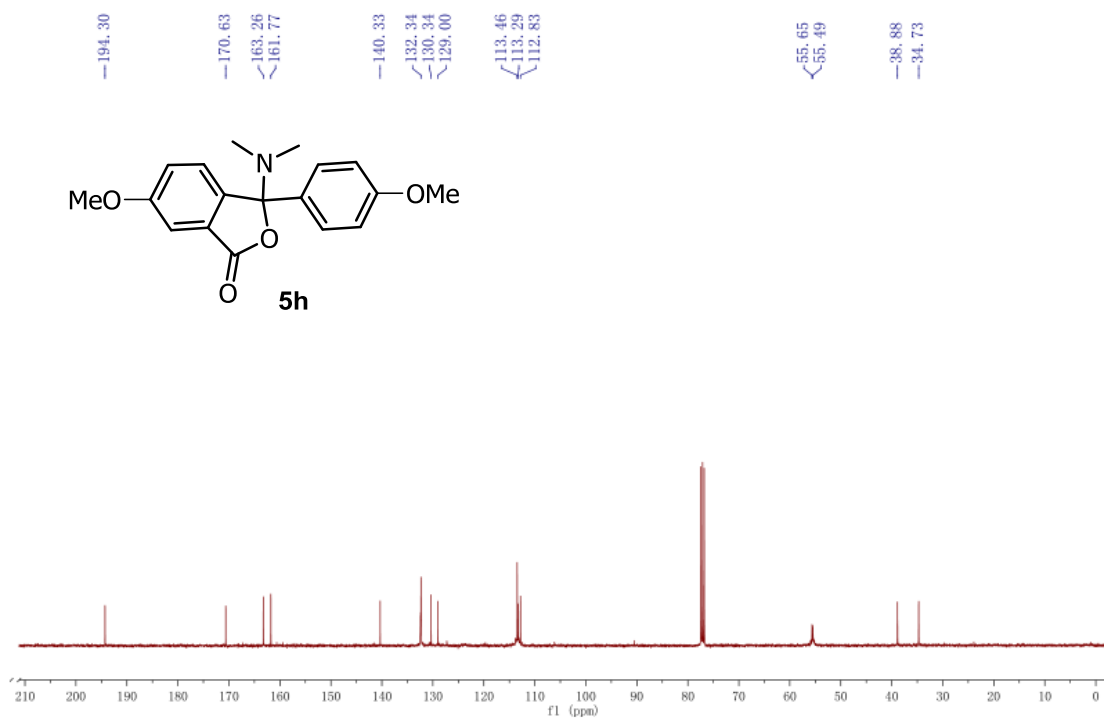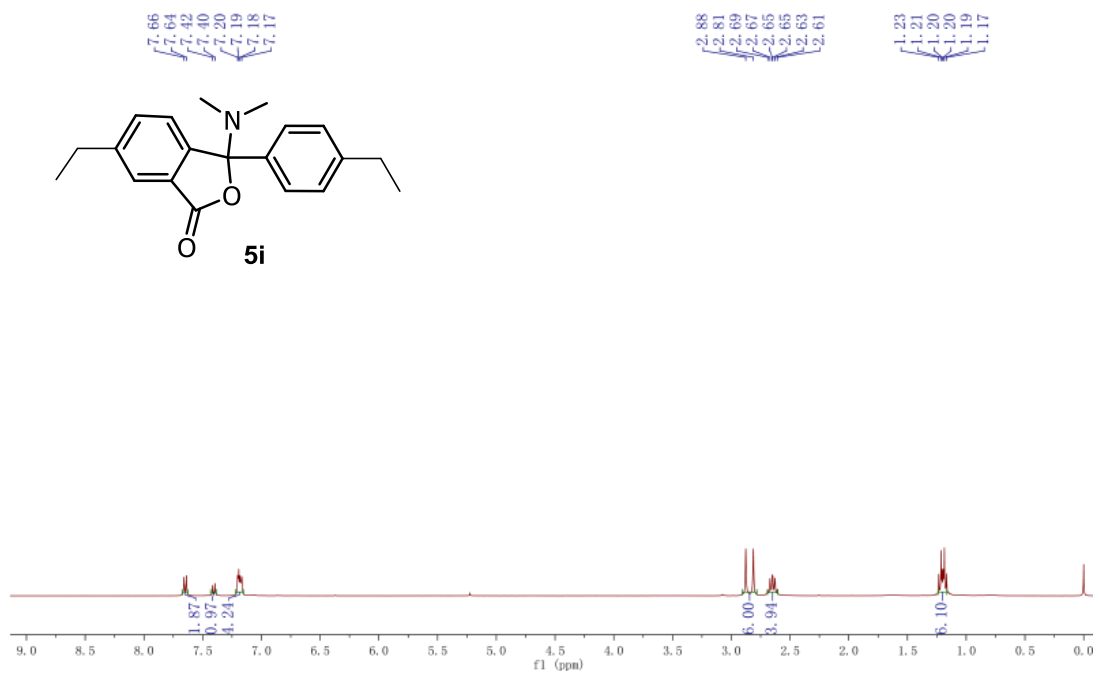

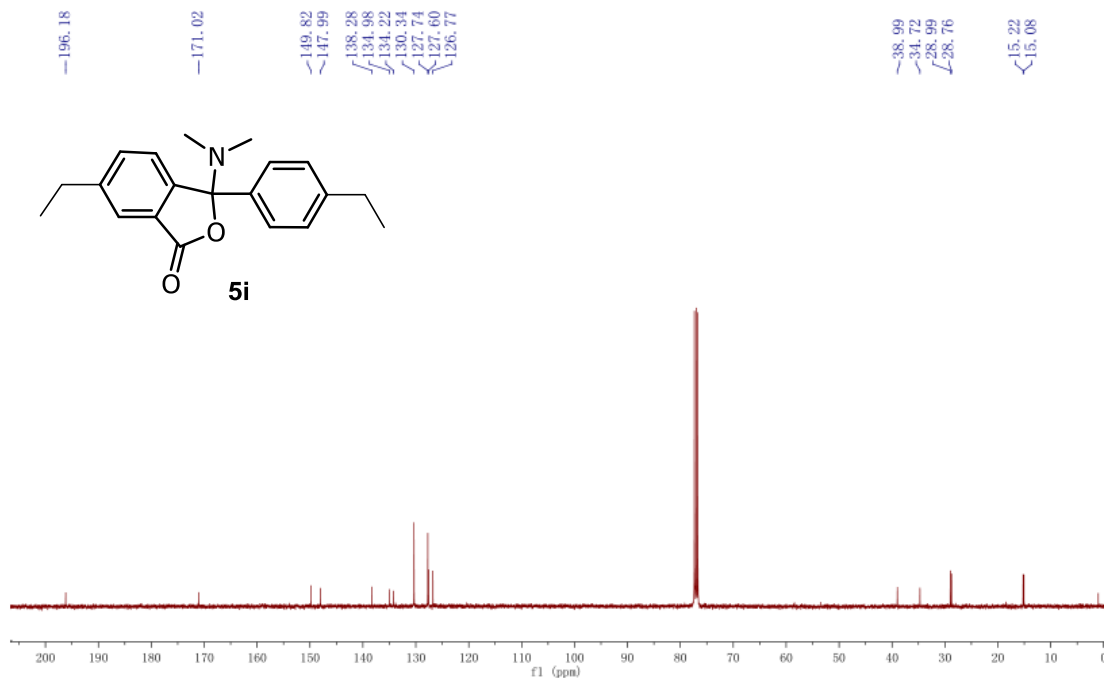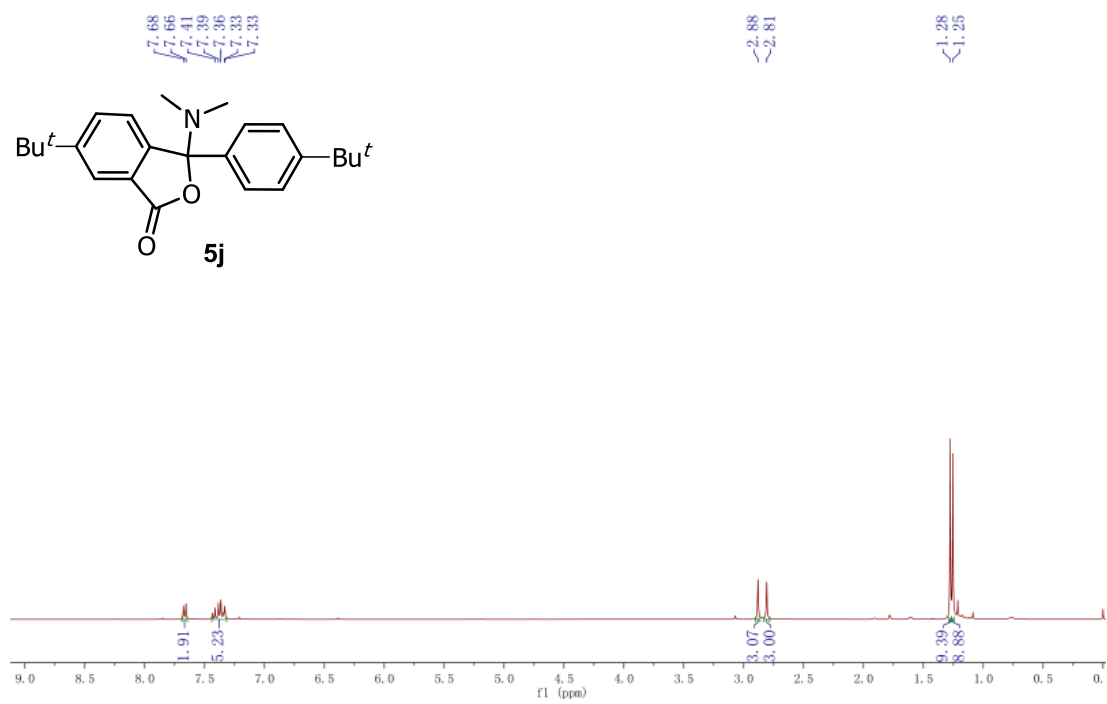



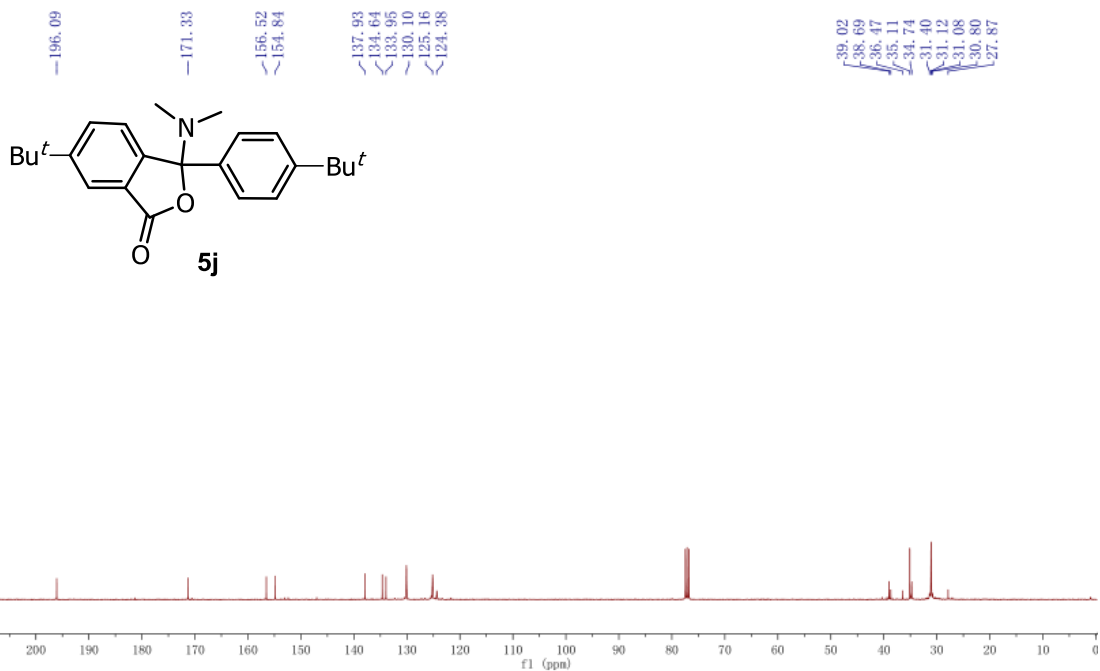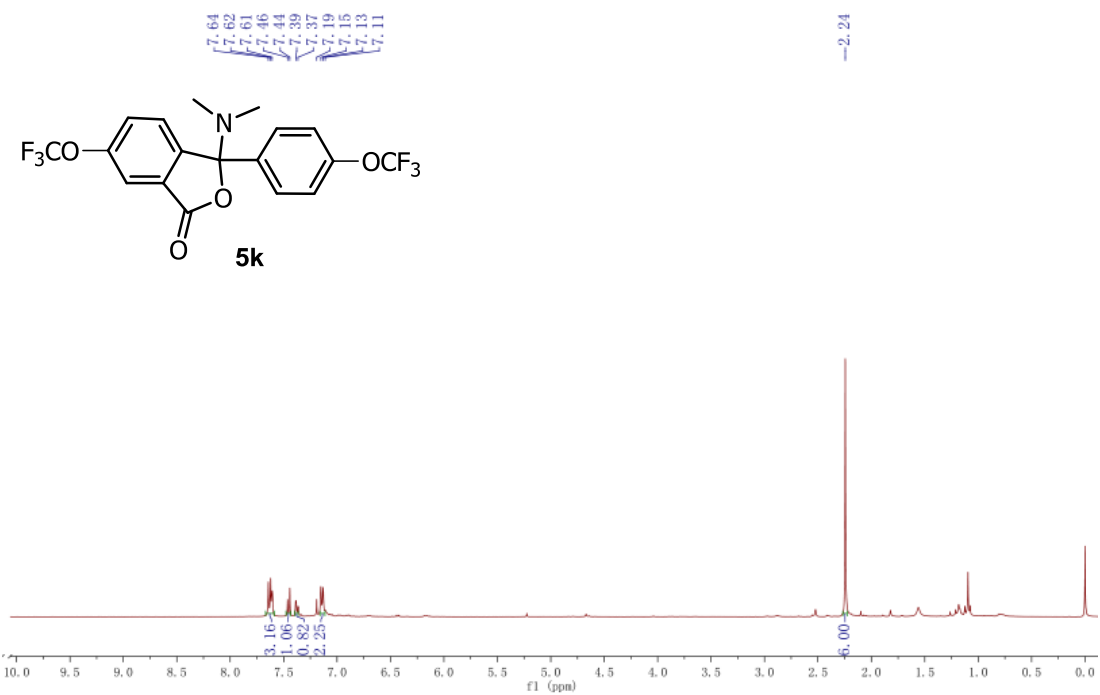

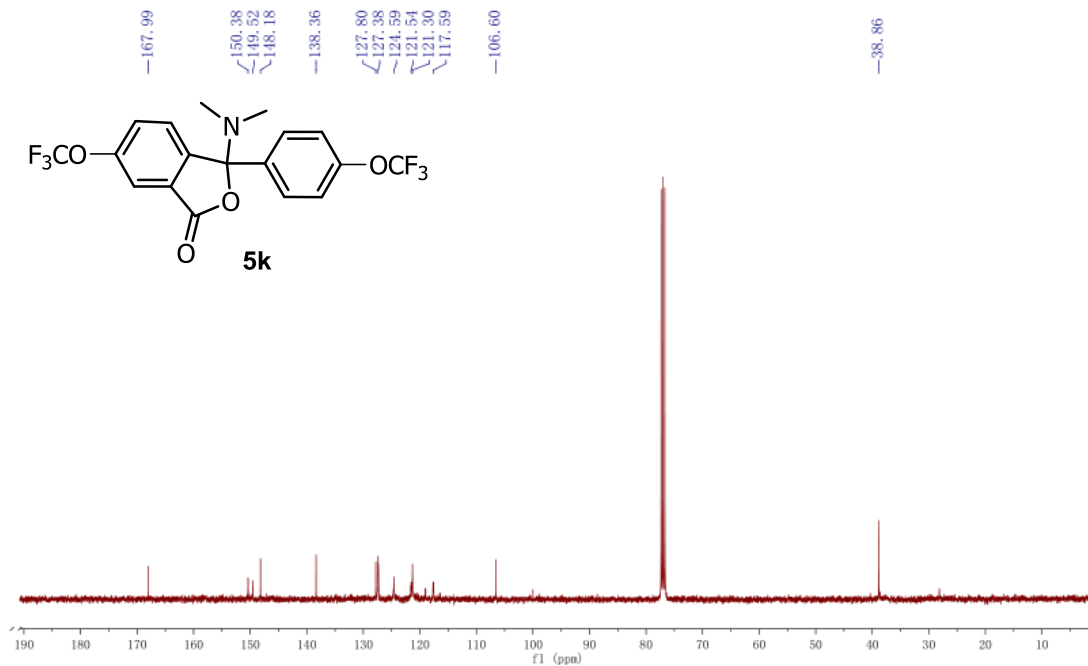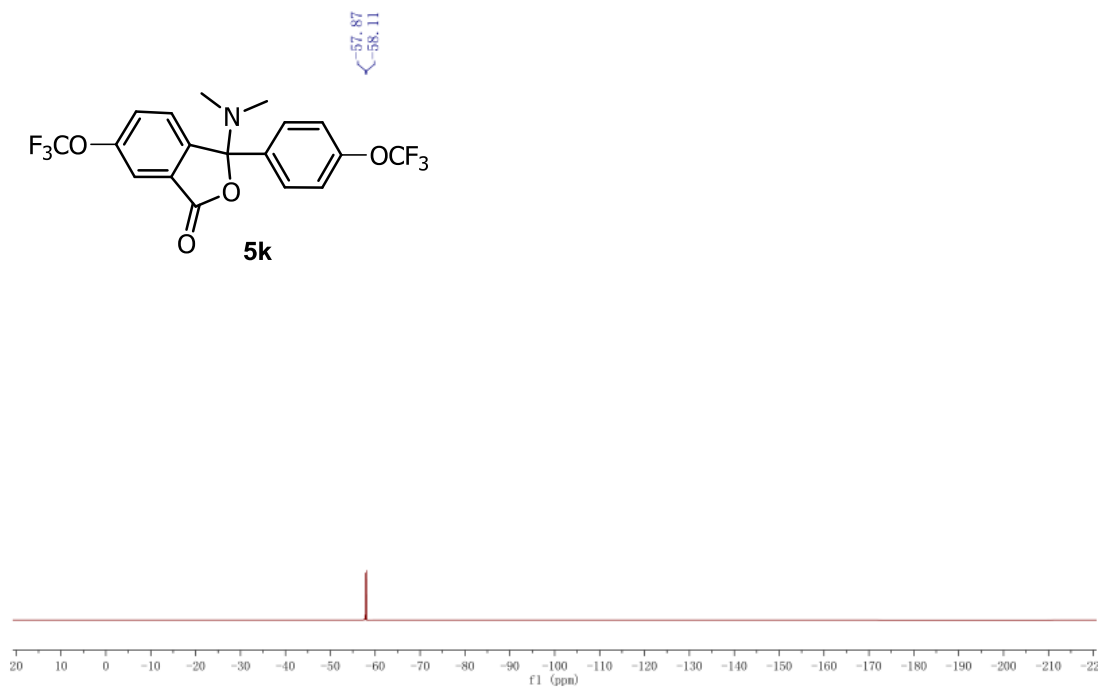

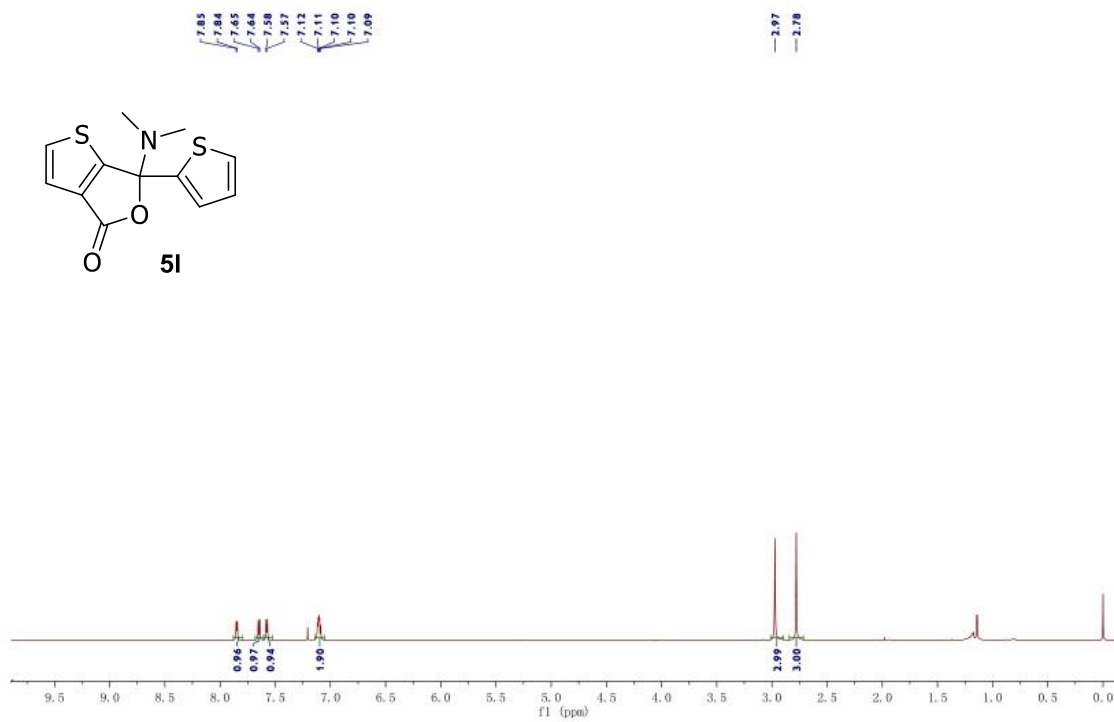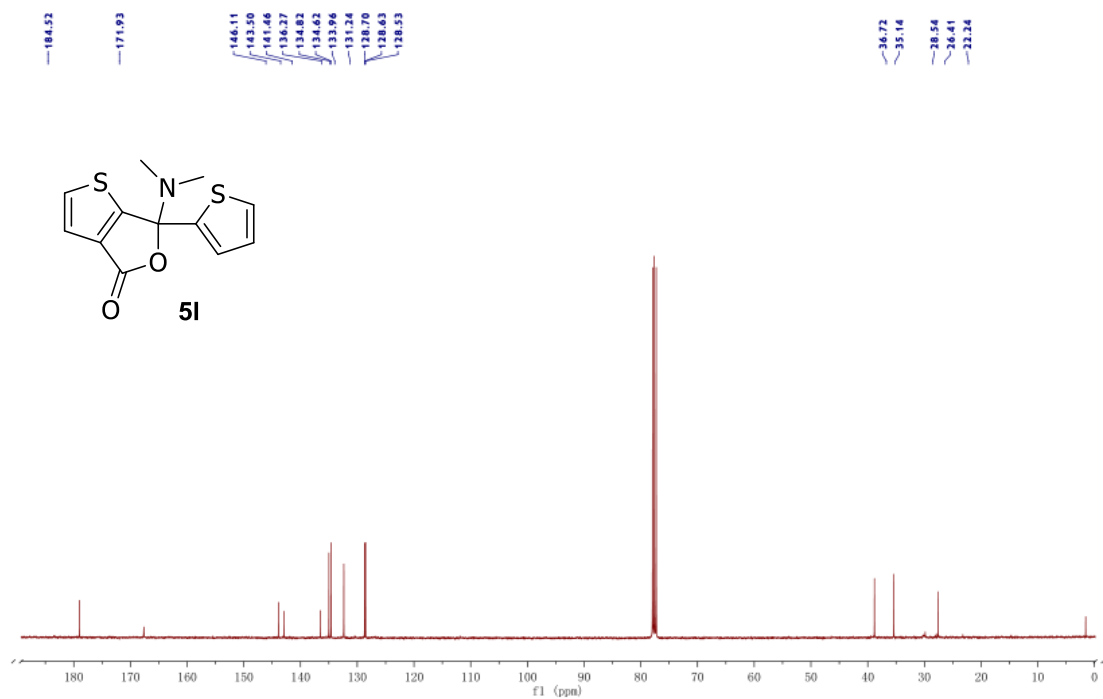

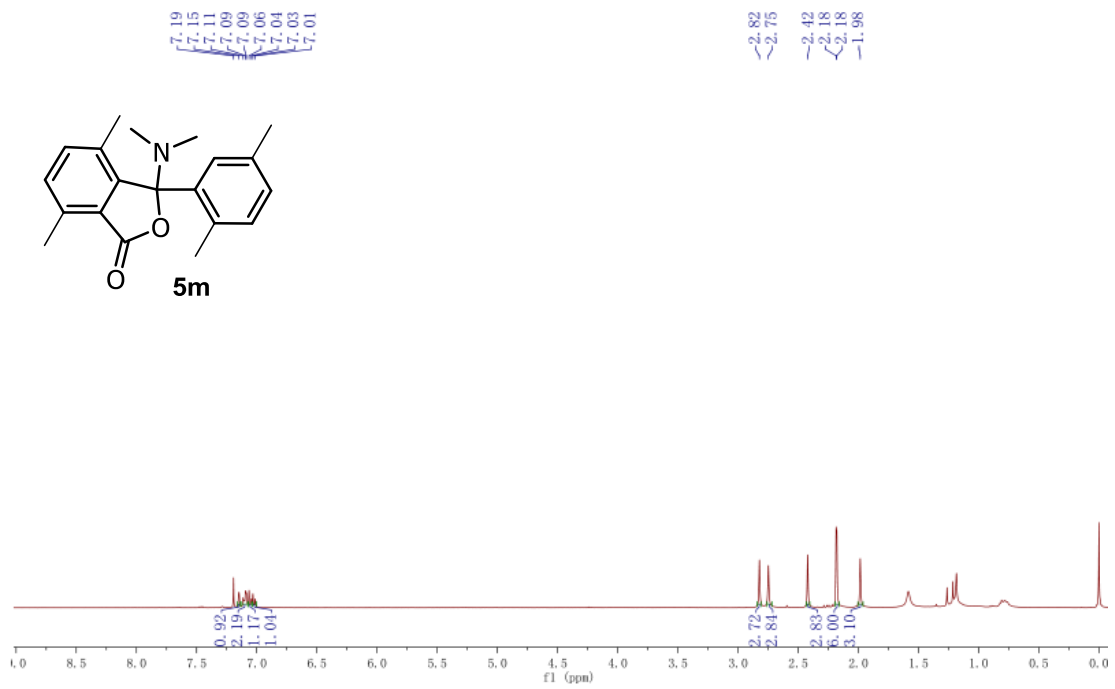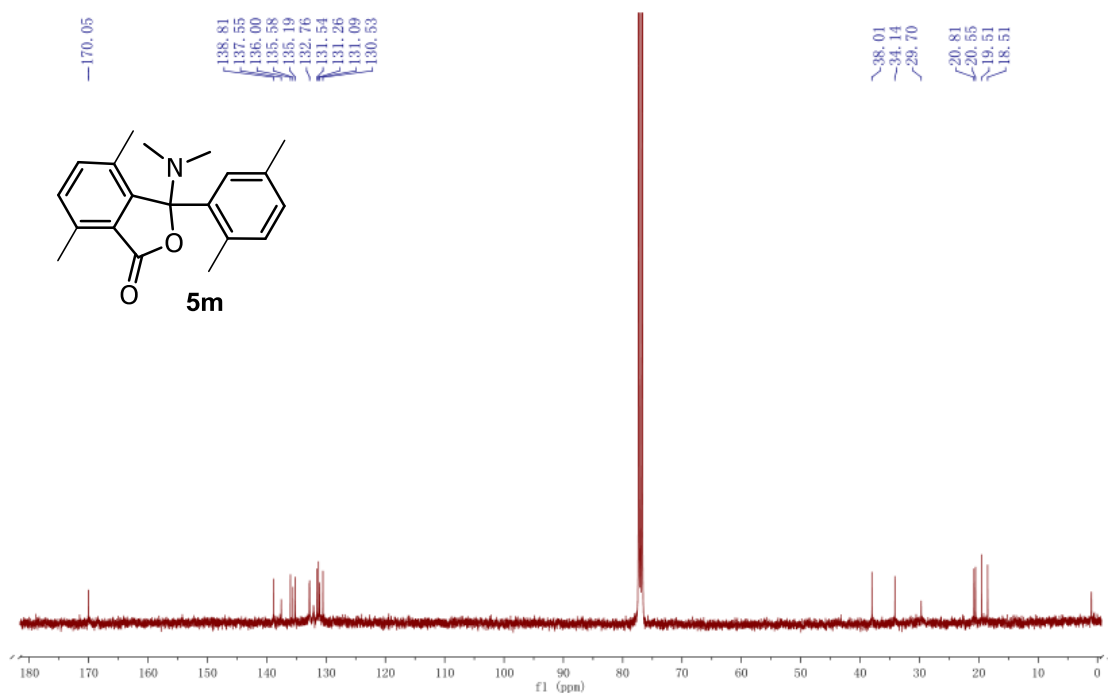

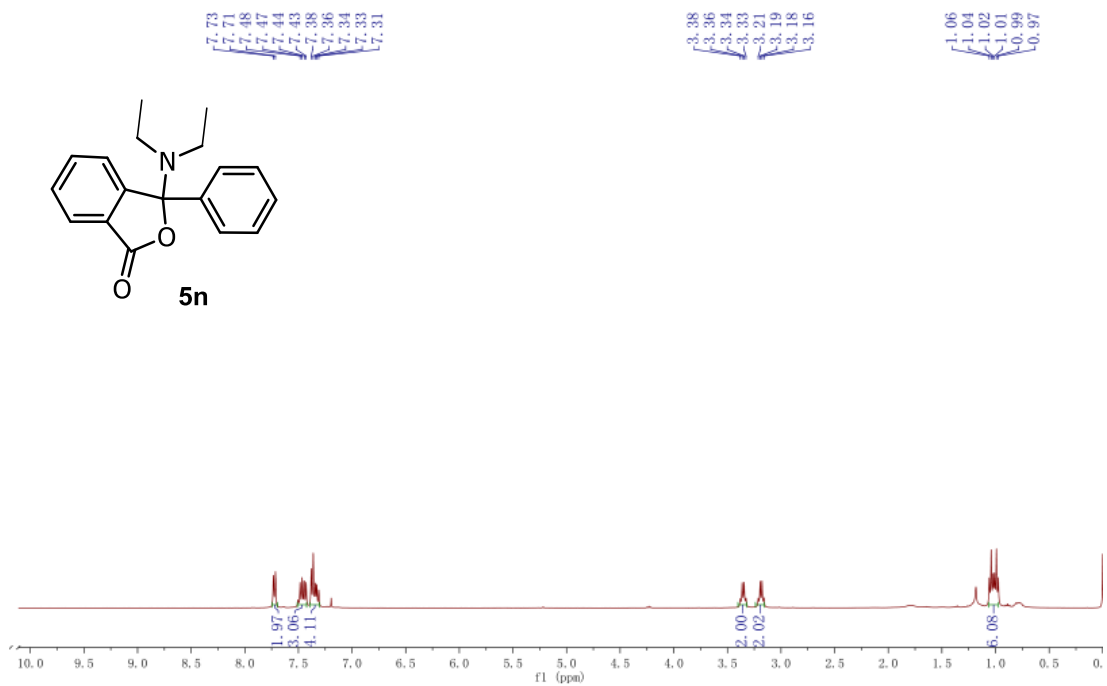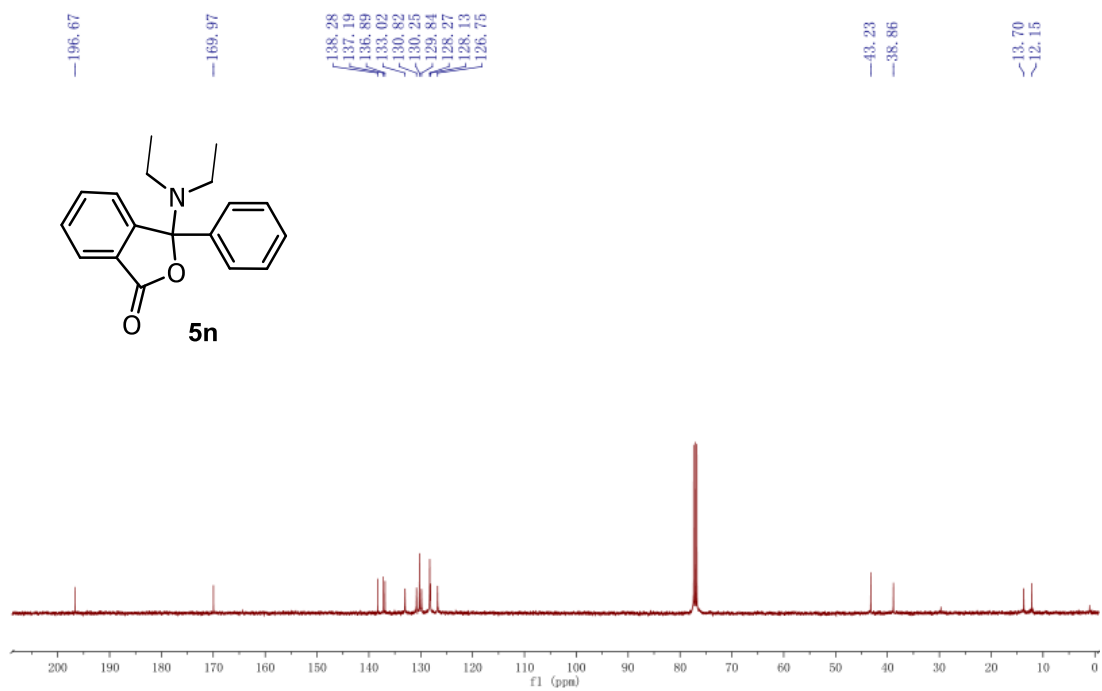

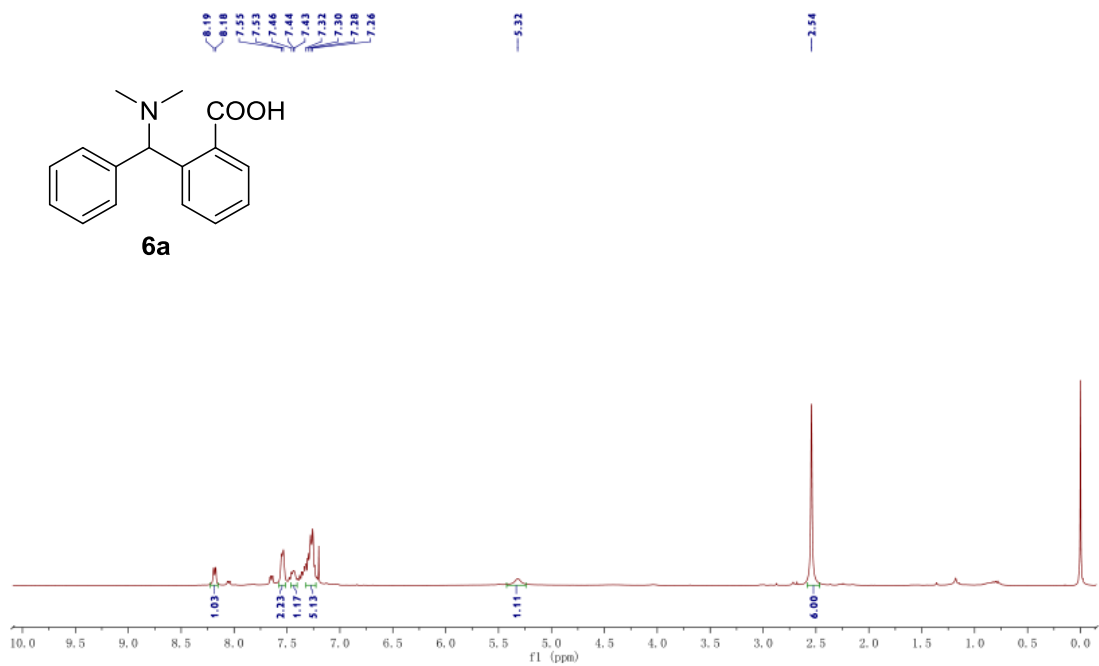

Supplement: SC-010-C9SC03081F-s001.pdf [file SC-010-C9SC03081F-s001.pdf]
